# Supplementary material for: Systematic Design of Adenosine Analogs as Inhibitors of a Clostridioides difficile-Specific DNA Adenine Methyltransferase Required for Normal Sporulation and Persistence
Source: PubMed Central journal article supplement — J Med Chem. 2022 Dec 29;66(1):934–50. doi: 10.1021/acs.jmedchem.2c01789 (PMC9841527; doi:10.1021/acs.jmedchem.2c01789), 2022-12-29

## SUPPORTING INFORMATION

### **Systematic design of adenosine analogs as inhibitors of a *Clostridioides difficile*-specific DNA adenine methyltransferase required for normal sporulation and persistence**

Jujun Zhou,<sup>1</sup> John R. Horton,<sup>1</sup> Martina Menna,<sup>2</sup> Francesco Fiorentino,<sup>2</sup> Ren Ren,<sup>1</sup> Dan Yu,<sup>1</sup> Taraneh Hajian,<sup>3</sup> Masoud Vedadi,<sup>3,4</sup> Giulia Mazzocanti,<sup>2</sup> Alessia Ciogli,<sup>2</sup> Elmar Weinhold,<sup>5</sup> Michael Hüben,<sup>5</sup> Robert M. Blumenthal,<sup>6</sup> Xing Zhang,<sup>1</sup> Antonello Mai,<sup>2,7,\*</sup> Dante Rotili,<sup>2,\*</sup> and Xiaodong Cheng<sup>1,\*</sup>

<sup>1</sup>Department of Epigenetics and Molecular Carcinogenesis, University of Texas MD Anderson Cancer Center, Houston, TX 77030, USA

<sup>2</sup>Department of Drug Chemistry and Technologies, Sapienza University of Rome, P.le A. Moro 5, 00185 Rome, Italy

<sup>3</sup>Structural Genomics Consortium, University of Toronto, Toronto, ON M5S 1A8, Canada

<sup>4</sup>Department of Pharmacology and Toxicology, University of Toronto, Toronto, ON M5S 1A8, Canada

<sup>5</sup>Institute of Organic Chemistry, RWTH Aachen University, D-52056 Aachen, Germany

<sup>6</sup>Department of Medical Microbiology and Immunology, and Program in Bioinformatics, The University of Toledo College of Medicine and Life Sciences, Toledo, OH 43614, USA

<sup>7</sup>Pasteur Institute, Cenci-Bolognetti Foundation, Sapienza University of Rome, P.le A. Moro 5, 00185 Rome, Italy

\* Correspondence: antonello.mai@uniroma1.it (AM); dante.rotili@uniroma1.it (DR); XCheng5@mdanderson.org (XC)

|                                                                                             |
|---------------------------------------------------------------------------------------------|
| <b>Contents</b>                                                                             |
| <b>Table S1.</b> Elemental analyses for final compounds <b>10-12, 14-21, and 31-42</b>      |
| <b>Table S2.</b> Summary of X-ray data collection and refinement statistics                 |
| <b>Table S3.</b> The predicted cell permeability of compounds <b>16, 38, and 39</b>         |
| <b>Figure S1.</b> Compounds <b>201-241</b> related to <b>MTA</b>                            |
| <b>Figure S2.</b> Raw data of MTase-Glo <sup>TM</sup> inhibition assay and ITC measurements |
| <b>Figure S3.</b> APNEA (compound <b>9</b> ) contains an impurity                           |
| <b>Figure S4.</b> Chemical stability of compound <b>39</b>                                  |
| <b>References</b>                                                                           |
| HR-MS spectra and HPLC traces of compounds <b>1-42</b>                                      |
| HPLC traces of compounds <b>201-241</b>                                                     |
| <b>Molecular Formula Strings</b> (in a separate CSV file)                                   |

**Table S1.** Elemental Analyses for Final Compounds **10-12, 14-21, and 31-42.**

| Lab code | Compd     | Formula                                                       | Calculated, % |      |       | Found, % |      |       |
|----------|-----------|---------------------------------------------------------------|---------------|------|-------|----------|------|-------|
|          |           |                                                               | C             | H    | N     | C        | H    | N     |
| MC4742   | <b>10</b> | C <sub>24</sub> H <sub>25</sub> N <sub>5</sub> O <sub>4</sub> | 64.42         | 5.63 | 15.65 | 64.52    | 5.63 | 15.60 |
| MC4736   | <b>11</b> | C <sub>22</sub> H <sub>23</sub> N <sub>5</sub> O <sub>4</sub> | 62.70         | 5.50 | 16.62 | 62.82    | 5.50 | 16.55 |
| MC4737   | <b>12</b> | C <sub>22</sub> H <sub>23</sub> N <sub>5</sub> O <sub>4</sub> | 62.70         | 5.50 | 16.62 | 62.81    | 5.51 | 16.56 |
| MC4741   | <b>14</b> | C <sub>19</sub> H <sub>23</sub> N <sub>5</sub> O <sub>4</sub> | 59.21         | 6.02 | 18.17 | 59.30    | 6.04 | 18.10 |
| MC4800   | <b>15</b> | C <sub>19</sub> H <sub>24</sub> N <sub>6</sub> O <sub>4</sub> | 56.99         | 6.04 | 20.99 | 57.11    | 6.05 | 20.92 |
| MC4761   | <b>16</b> | C <sub>19</sub> H <sub>23</sub> N <sub>5</sub> O <sub>5</sub> | 56.85         | 5.78 | 17.45 | 56.97    | 5.78 | 17.39 |
| MC4760   | <b>17</b> | C <sub>20</sub> H <sub>25</sub> N <sub>5</sub> O <sub>5</sub> | 57.82         | 6.07 | 16.86 | 57.92    | 6.08 | 16.81 |
| MC4756   | <b>18</b> | C <sub>20</sub> H <sub>25</sub> N <sub>5</sub> O <sub>4</sub> | 60.14         | 6.31 | 17.53 | 60.25    | 6.32 | 17.47 |
| MC4757   | <b>19</b> | C <sub>21</sub> H <sub>27</sub> N <sub>5</sub> O <sub>4</sub> | 61.00         | 6.58 | 16.94 | 61.12    | 6.58 | 16.87 |
| MC4795   | <b>20</b> | C <sub>15</sub> H <sub>23</sub> N <sub>5</sub> O <sub>5</sub> | 50.98         | 6.56 | 19.82 | 51.11    | 6.58 | 19.76 |
| MC4758   | <b>21</b> | C <sub>22</sub> H <sub>29</sub> N <sub>5</sub> O <sub>4</sub> | 61.81         | 6.84 | 16.38 | 61.91    | 6.85 | 16.32 |
| MC4764   | <b>31</b> | C <sub>22</sub> H <sub>28</sub> N <sub>6</sub> O <sub>4</sub> | 59.99         | 6.41 | 19.08 | 60.09    | 6.42 | 19.01 |
| MC4770   | <b>32</b> | C <sub>21</sub> H <sub>23</sub> N <sub>7</sub> O <sub>4</sub> | 57.66         | 5.30 | 22.41 | 57.78    | 5.30 | 22.34 |
| MC4771   | <b>33</b> | C <sub>17</sub> H <sub>24</sub> N <sub>6</sub> O <sub>4</sub> | 54.24         | 6.43 | 22.33 | 54.36    | 6.44 | 22.26 |
| MC4776   | <b>34</b> | C <sub>18</sub> H <sub>28</sub> N <sub>6</sub> O <sub>4</sub> | 55.09         | 7.19 | 21.41 | 55.20    | 7.19 | 21.35 |
| MC4769   | <b>35</b> | C <sub>17</sub> H <sub>26</sub> N <sub>6</sub> O <sub>5</sub> | 51.77         | 6.64 | 21.31 | 51.90    | 6.65 | 21.25 |
| MC4778   | <b>36</b> | C <sub>18</sub> H <sub>29</sub> N <sub>7</sub> O <sub>4</sub> | 53.06         | 7.17 | 24.06 | 53.18    | 7.18 | 23.99 |
| MC4830   | <b>37</b> | C <sub>21</sub> H <sub>32</sub> N <sub>6</sub> O <sub>6</sub> | 54.30         | 6.94 | 18.09 | 54.44    | 6.95 | 18.02 |
| MC4777   | <b>38</b> | C <sub>22</sub> H <sub>34</sub> N <sub>6</sub> O <sub>6</sub> | 55.22         | 7.16 | 17.56 | 55.34    | 7.18 | 17.50 |
| MC4799   | <b>39</b> | C <sub>23</sub> H <sub>36</sub> N <sub>6</sub> O <sub>6</sub> | 56.08         | 7.37 | 17.06 | 56.20    | 7.38 | 17.00 |
| MC4831   | <b>40</b> | C <sub>22</sub> H <sub>34</sub> N <sub>6</sub> O <sub>6</sub> | 55.22         | 7.16 | 17.56 | 55.35    | 7.17 | 17.49 |
| MC4832   | <b>41</b> | C <sub>23</sub> H <sub>34</sub> N <sub>6</sub> O <sub>6</sub> | 56.31         | 6.99 | 17.13 | 56.43    | 7.00 | 17.07 |
| MC4919   | <b>42</b> | C <sub>18</sub> H <sub>28</sub> N <sub>6</sub> O <sub>4</sub> | 55.09         | 7.19 | 21.41 | 55.22    | 7.19 | 21.34 |

Table S2. Summary of X-ray data collection at wavelength=1Å of beamline APS 222-ID and refinement statistics (\*) of space group  $P2_12_12_1$  ( $\alpha=\beta=\gamma=90^\circ$ )

| Date Collected                                                  | 03/2021                | 06/2021                   | 06/2021                   | 06/2021                   | 06/2021                   | 06/2021                   | 07/2021                  |
|-----------------------------------------------------------------|------------------------|---------------------------|---------------------------|---------------------------|---------------------------|---------------------------|--------------------------|
| compound                                                        | 214 (MTA)              | <b>2</b><br>(161; MC4679) | <b>3</b><br>(162; MC4680) | <b>8</b><br>(163; MC4681) | <b>4</b><br>(164; MC4682) | <b>6</b><br>(165; MC4683) | <b>9</b><br>(168; APNEA) |
| PDB Code                                                        | 8CXS                   | 8CXU                      | 8CXV                      | 8CXY                      | 8CXW                      | 8CXX                      | 8CY2                     |
| Cell dimensions (Å)                                             | 81.97, 161.16, 230.80  | 81.45, 161.24, 229.52     | 81.46, 161.34, 229.79     | 81.36, 161.36, 229.75     | 81.33, 161.63, 229.60     | 81.76, 161.47, 230.27     | 81.53, 161.81, 230.34    |
| Resolution (Å)                                                  | 41.87-2.49 (2.89-2.49) | 44.86-2.28 (2.37-2.28)    | 44.88-2.26 (2.37-2.26)    | 48.71-2.19 (2.27-2.19)    | 46.80-2.78 (2.89-2.78)    | 44.29-2.34 (2.43-2.34)    | 45.17-2.81 (2.89-2.81)   |
| <sup>a</sup> R <sub>merge</sub>                                 | 0.292 (2.295)          | 0.233 (1.70)              | 0.244 (2.09)              | 0.166 (1.93)              | 0.224 (1.51)              | 0.165 (1.46)              | 0.465 (3.28)             |
| R <sub>pim</sub>                                                | 0.074 (0.700)          | 0.072 (0.733)             | 0.070 (0.788)             | 0.040 (0.575)             | 0.110 (0.789)             | 0.048 (0.499)             | 0.141 (1.081)            |
| CC <sub>1/2</sub> , CC*                                         | (0.469, 0.799)         | (0.410, 0.762)            | (0.344, 0.715)            | (0.762, 0.930)            | (0.394, 0.752)            | (0.503, 0.818)            | (0.402, 0.758)           |
| <sup>b</sup> <I/σI>                                             | 11.4 (1.3)             | 10.0 (0.9)                | 10.9 (1.0)                | 14.9 (1.4)                | 7.4 (1.1)                 | 14.4 (1.2)                | 8.0 (1.1)                |
| Completeness (%)                                                | 99.6 (94.9)            | 93.5 (74.8)               | 95.0 (90.5)               | 95.0 (83.4)               | 99.6 (99.6)               | 96.5 (76.0)               | 99.9 (99.9)              |
| Redundancy                                                      | 14.9 (10.1)            | 8.9 (4.8)                 | 12.4 (6.8)                | 14.4 (9.1)                | 5.1 (4.5)                 | 12.1 (8.1)                | 11.6 (9.9)               |
| Observed reflections                                            | 1,578,071              | 1,147,875                 | 1,650,078                 | 2,167,132                 | 390,186                   | 1,497,945                 | 861,139                  |
| Unique reflections                                              | 106,240                | 129,038                   | 133,608                   | 147,745                   | 76,354                    | 123,740                   | 74,091                   |
| <b>Refinement</b>                                               |                        |                           |                           |                           |                           |                           |                          |
| Resolution (Å)                                                  | 2.49                   | 2.28                      | 2.26                      | 2.19                      | 2.78                      | 2.34                      | 2.81                     |
| No. reflections                                                 | 106,072                | 128,797                   | 133,381                   | 147,569                   | 76,256                    | 123,583                   | 73,994                   |
| <sup>c</sup> R <sub>work</sub> / <sup>d</sup> R <sub>free</sub> | 0.179 / 0.213          | 0.186 / 0.222             | 0.177 / 0.205             | 0.174 / 0.203             | 0.184 / 0.230             | 0.179 / 0.206             | 0.171 / 0.222            |
| No. Atoms                                                       |                        |                           |                           |                           |                           |                           |                          |
| Protein                                                         | 13,408                 | 13,407                    | 13,421                    | 13,401                    | 13,372                    | 13,464                    | 13,280                   |
| DNA                                                             | 1704                   | 1704                      | 1704                      | 1704                      | 1704                      | 1704                      | 1704                     |
| Inhibitor                                                       | 60                     | 81                        | 81                        | 81                        | 87                        | 84                        | 84                       |
| Solvent                                                         | 440                    | 629                       | 736                       | 759                       | 406                       | 582                       | 348                      |
| B Factors (Å <sup>2</sup> )                                     |                        |                           |                           |                           |                           |                           |                          |
| Protein                                                         | 51.1                   | 46.2                      | 48.0                      | 48.7                      | 51.7                      | 52.8                      | 56.0                     |
| DNA                                                             | 56.1                   | 50.2                      | 54.8                      | 54.9                      | 59.7                      | 59.6                      | 64.5                     |
| Inhibitor                                                       | 53.1                   | 55.4                      | 54.5                      | 48.9                      | 64.9                      | 70.3                      | 65.3                     |
| Solvent                                                         | 41.2                   | 41.9                      | 43.8                      | 45.3                      | 38.4                      | 46.8                      | 44.5                     |
| <b>R.m.s. deviations</b>                                        |                        |                           |                           |                           |                           |                           |                          |
| Bond lengths (Å)                                                | 0.003                  | 0.003                     | 0.004                     | 0.004                     | 0.003                     | 0.003                     | 0.004                    |
| Bond angles (°)                                                 | 0.6                    | 0.6                       | 0.6                       | 0.6                       | 0.5                       | 0.6                       | 0.6                      |

\* Values in parenthesis correspond to highest resolution shell;

<sup>a</sup> R<sub>merge</sub> =  $\sum |I - \langle I \rangle| / \sum I$ , where I is the observed intensity and  $\langle I \rangle$  is the averaged intensity from multiple observations;<sup>b</sup>  $\langle I/\sigma I \rangle$  = averaged ratio of the intensity (I) to the error of the intensity ( $\sigma I$ );<sup>c</sup> R<sub>work</sub> =  $\sum |F_{obs} - F_{cal}| / \sum |F_{obs}|$ , where F<sub>obs</sub> and F<sub>cal</sub> are the observed and calculated structure factors, respectively;<sup>d</sup> R<sub>free</sub> was calculated using a randomly chosen subset (5%) of the reflections not used in refinement.

Table S2 (Continues) Summary of X-ray data collection at wavelength=1Å of beamline APS 22-ID and refinement statistics (\*) of space group  $P2_12_12_1$  ( $\alpha=\beta=\gamma=90^\circ$ )

| Date Collected                                                  | 09/2021                    | 11/2021                    | 11/2021                    | 11/2021                    | 03/2022                    | 03/2022                    | 03/2021                   |
|-----------------------------------------------------------------|----------------------------|----------------------------|----------------------------|----------------------------|----------------------------|----------------------------|---------------------------|
| Inhibitor                                                       | <b>14</b><br>(174; MC4741) | <b>18</b><br>(178; MC4756) | <b>19</b><br>(179; MC5757) | <b>16</b><br>(181; MC4761) | <b>15</b><br>(197; MC4800) | <b>39</b><br>(199; MC4799) | <b>1</b><br>(101; MC4624) |
| PDB Code                                                        | 8CXZ                       | 8CY0                       | 8CY1                       | 8CY4                       | 8CY3                       | 8CY5                       | 8CXT                      |
| Cell dimensions (Å)                                             | 81.44, 161.43, 229.71      | 81.37, 160.86, 230.38      | 81.25, 161.57, 229.93      | 81.31, 161.76, 229.95      | 81.24, 161.24, 229.58      | 81.55, 161.23, 230.29      | 82.21, 161.67, 230.80     |
| Resolution (Å)                                                  | 45.89-2.35 (2.43-2.35)     | 47.01-2.65 (2.74-2.65)     | 44.89-2.38 (2.48-2.38)     | 44.10-2.34 (2.43-2.34)     | 46.9-2.65 (2.74-2.65)      | 47.03-2.50 (2.58-2.50)     | 44.23-2.61 (2.74-2.61)    |
| <sup>a</sup> R <sub>merge</sub>                                 | 0.210 (1.36)               | 0.281 (1.89)               | 0.282 (1.80)               | 0.251 (1.73)               | 0.279 (1.64)               | 0.244 (1.35)               | 0.337 (2.535)             |
| R <sub>pim</sub>                                                | 0.071 (0.519)              | 0.116 (0.926)              | 0.100 (0.728)              | 0.076 (0.661)              | 0.083 (0.646)              | 0.057 (0.642)              | 0.063 (0.678)             |
| CC <sub>1/2</sub> , CC*                                         | (0.356, 0.724)             | (0.363, 0.730)             | (0.374, 0.738)             | (0.472, 0.801)             | (0.387, 0.747)             | (0.431, 0.776)             | (0.468, 0.799)            |
| <sup>b</sup> <I/σI>                                             | 12.4 (1.2)                 | 8.1 (1.1)                  | 8.0 (0.81)                 | 10.2 (0.95)                | 8.6 (0.8)                  | 12.7 (1.0)                 | 11.3 (1.2)                |
| Completeness (%)                                                | 99.5 (97.4)                | 99.8 (99.6)                | 96.2 (77.7)                | 96.6 (86.9)                | 97.3 (85.5)                | 99.3 (93.4)                | 100.0 (99.8)              |
| Redundancy                                                      | 12.7 (6.6)                 | 6.6 (4.5)                  | 8.6 (4.9)                  | 10.9 (6.3)                 | 11.3 (6.0)                 | 12.6 (4.4)                 | 23.8 (9.7)                |
| Observed reflections                                            | 1,588,738                  | 582,034                    | 1,012,216                  | 1,339,925                  | 966,027                    | 1,329,225                  | 2,164,493                 |
| Unique reflections                                              | 125,490                    | 88,696                     | 117,552                    | 122,653                    | 85,741                     | 105,385                    | 91,039                    |
| <b>Refinement</b>                                               |                            |                            |                            |                            |                            |                            |                           |
| Resolution (Å)                                                  | 2.35                       | 2.65                       | 2.38                       | 2.34                       | 2.65                       | 2.50                       | 2.61                      |
| No. reflections                                                 | 125,292                    | 88,571                     | 117,266                    | 121,299                    | 85,314                     | 105,232                    | 90,810                    |
| <sup>c</sup> R <sub>work</sub> / <sup>d</sup> R <sub>free</sub> | 0.174 / 0.204              | 0.173 / 0.221              | 0.182 / 0.227              | 0.173 / 0.207              | 0.190 / 0.226              | 0.177 / 0.210              | 0.189 / 0.224             |
| No. Atoms                                                       |                            |                            |                            |                            |                            |                            |                           |
| Protein                                                         | 13,424                     | 13,368                     | 13,386                     | 13,402                     | 13,368                     | 13,397                     | 13,241                    |
| DNA                                                             | 1704                       | 1704                       | 1704                       | 1704                       | 1704                       | 1704                       | 1704                      |
| Inhibitor                                                       | 84                         | 87                         | 90                         | 87                         | 87                         | 105                        | 78                        |
| Solvent                                                         | 849                        | 498                        | 747                        | 818                        | 305                        | 609                        | 136                       |
| B Factors (Å <sup>2</sup> )                                     |                            |                            |                            |                            |                            |                            |                           |
| Protein                                                         | 53.2                       | 58.3                       | 58.1                       | 51.1                       | 74.9                       | 65.0                       | 68.9                      |
| DNA                                                             | 61.2                       | 68.0                       | 68.1                       | 58.0                       | 85.9                       | 73.0                       | 73.5                      |
| Inhibitor                                                       | 53.4                       | 62.8                       | 63.2                       | 55.1                       | 78.4                       | 66.9                       | 79.8                      |
| Solvent                                                         | 48.0                       | 47.7                       | 51.0                       | 45.8                       | 60.4                       | 55.2                       | 56.2                      |
| <b>R.m.s. deviations</b>                                        |                            |                            |                            |                            |                            |                            |                           |
| Bond lengths (Å)                                                | 0.003                      | 0.003                      | 0.003                      | 0.003                      | 0.003                      | 0.002                      | 0.003                     |
| Bond angles (°)                                                 | 0.6                        | 0.5                        | 0.6                        | 0.6                        | 0.5                        | 0.5                        | 0.6                       |

\* Values in parenthesis correspond to highest resolution shell;

<sup>a</sup> R<sub>merge</sub> =  $\sum |I - \langle I \rangle| / \sum I$ , where I is the observed intensity and  $\langle I \rangle$  is the averaged intensity from multiple observations;

<sup>b</sup> <I/σI> = averaged ratio of the intensity (I) to the error of the intensity (σI);

<sup>c</sup> R<sub>work</sub> =  $\sum |F_{obs} - F_{cal}| / \sum |F_{obs}|$ , where F<sub>obs</sub> and F<sub>cal</sub> are the observed and calculated structure factors, respectively;

<sup>d</sup> R<sub>free</sub> was calculated using a randomly chosen subset (5%) of the reflections not used in refinement.

**Table S3.** The predicted cell permeability of compounds **16**, **38**, and **39**

| Compound  |                        | Caco2 permeability ( $P_{app}$ )  |                                      | Human intestinal absorption |                 | References                                                |
|-----------|------------------------|-----------------------------------|--------------------------------------|-----------------------------|-----------------|-----------------------------------------------------------|
|           |                        | pkCSM<br>( $\times 10^{-6}$ cm/s) | PreADMET<br>( $\times 10^{-6}$ cm/s) | pkCSM<br>(%)                | PreADMET<br>(%) |                                                           |
| <b>16</b> | -                      | 1.77                              | 1.68                                 | 63.9                        | 74.4            | -                                                         |
| <b>38</b> | -                      | 1.85                              | 1.93                                 | 60.6                        | 73.5            | -                                                         |
| <b>39</b> | -                      | 1.78                              | 1.57                                 | 61.5                        | 76.2            | -                                                         |
| <b>7</b>  | Nitrobenzylthioinosine | 0.79                              | 0.33                                 | 73.9                        | 64.9            | In cells <sup>1</sup>                                     |
| <b>9</b>  | APNEA                  | 1.81                              | 1.45                                 | 62.1                        | 74.0            | In cells/tissues <sup>2,3</sup><br>In vivo <sup>4,5</sup> |
| <b>13</b> | A2AR-agonist-1         | 1.81                              | 0.54                                 | 70.0                        | 75.7            | In vivo <sup>6</sup>                                      |

We have performed *in silico* cell permeability prediction using two different tools: pkCSM (<https://biosig.lab.uq.edu.au/>)<sup>7</sup> and PreADMET (<https://preadmet.webservice.bmdrc.org/>). Both tools enable the prediction of Caco-2 cell permeability and human intestinal absorption.

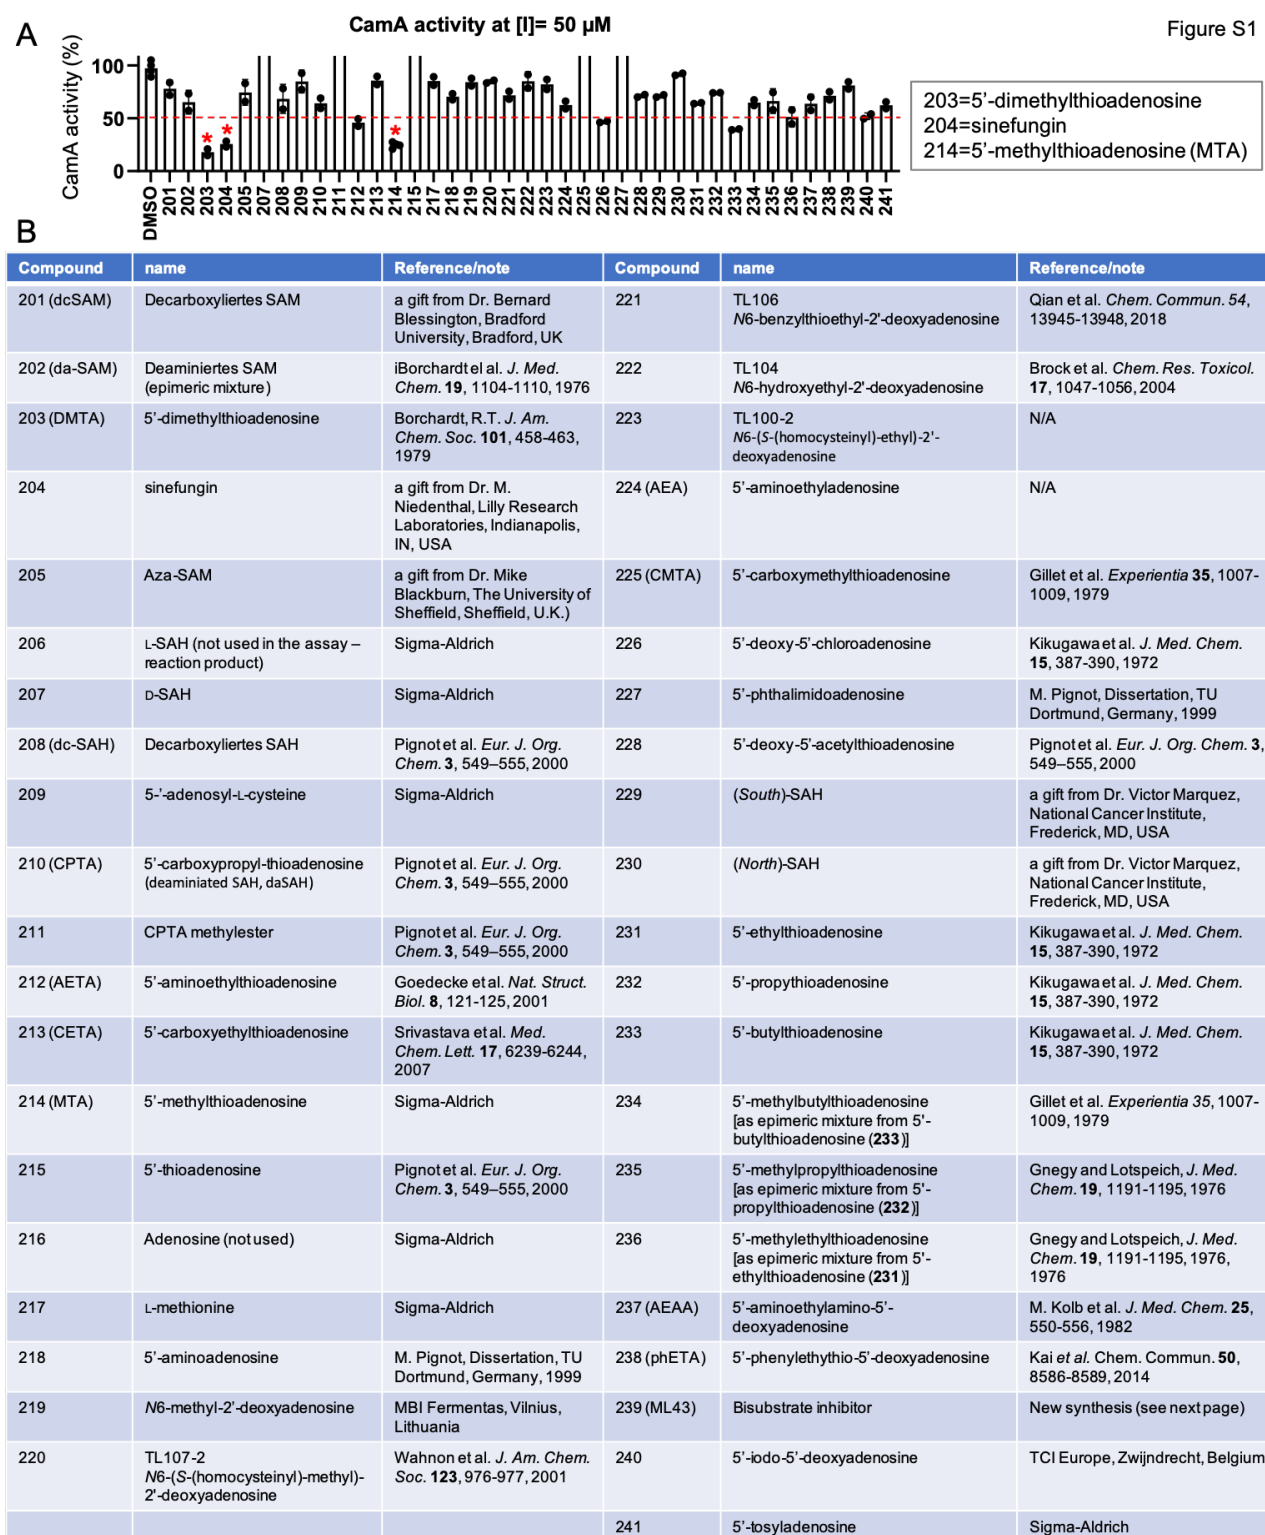

**Figure S1.** (A) Screen of CamA inhibition against SAM analogs at [I]=50  $\mu$ M, in the presence of 40  $\mu$ M co-substrate SAM. Three compounds, **203** (dMTA), **204** (sinefungin) and **214** (MTA), have inhibitions at >50% CamA activity. Compounds **207**, **211**, **215**, **225** and **227** might interfere with the Promega MTase-Glo<sup>TM</sup> luminescent assay used in the study (see Figure S3). (B) Compound information (see HPLC traces of compounds 201-241).

Figure S2

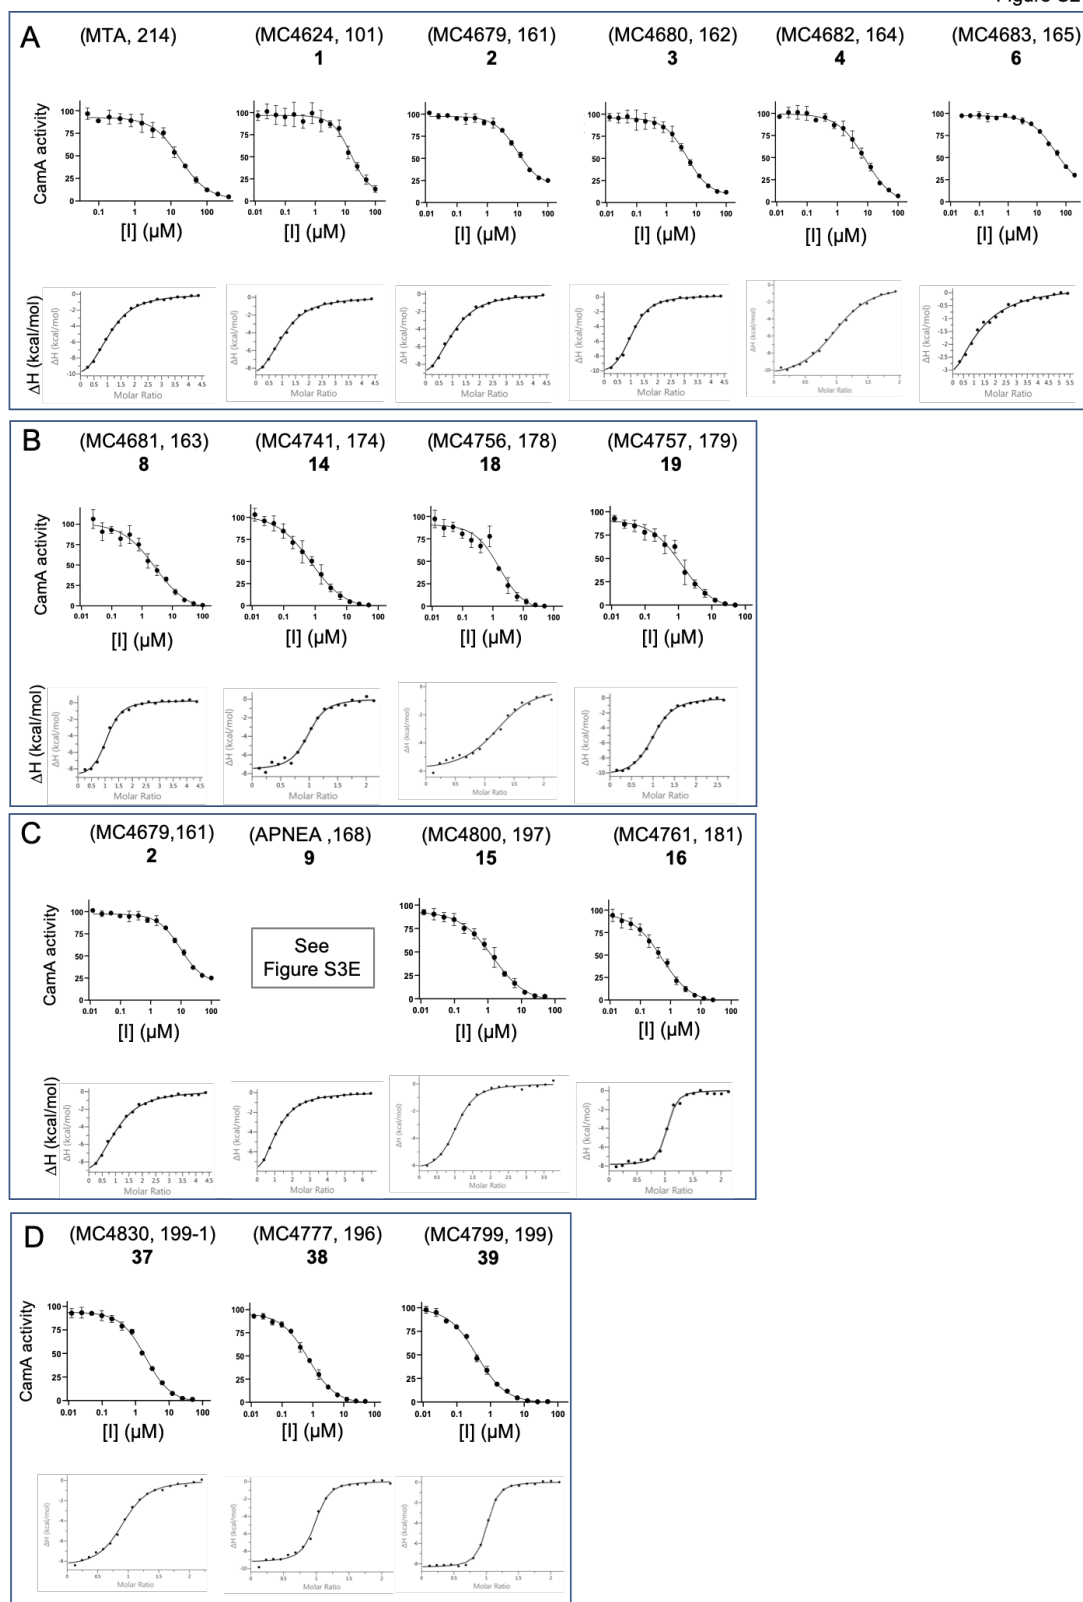

**Figure S2. Raw data of MTase-Glo<sup>TM</sup> inhibition assay (top panels) and ITC measurements (bottom panels). (A) Related to Figure 3. (B) Related to Figure 4. (C) Related to Figure 5. (D) Related to Figure 6.**



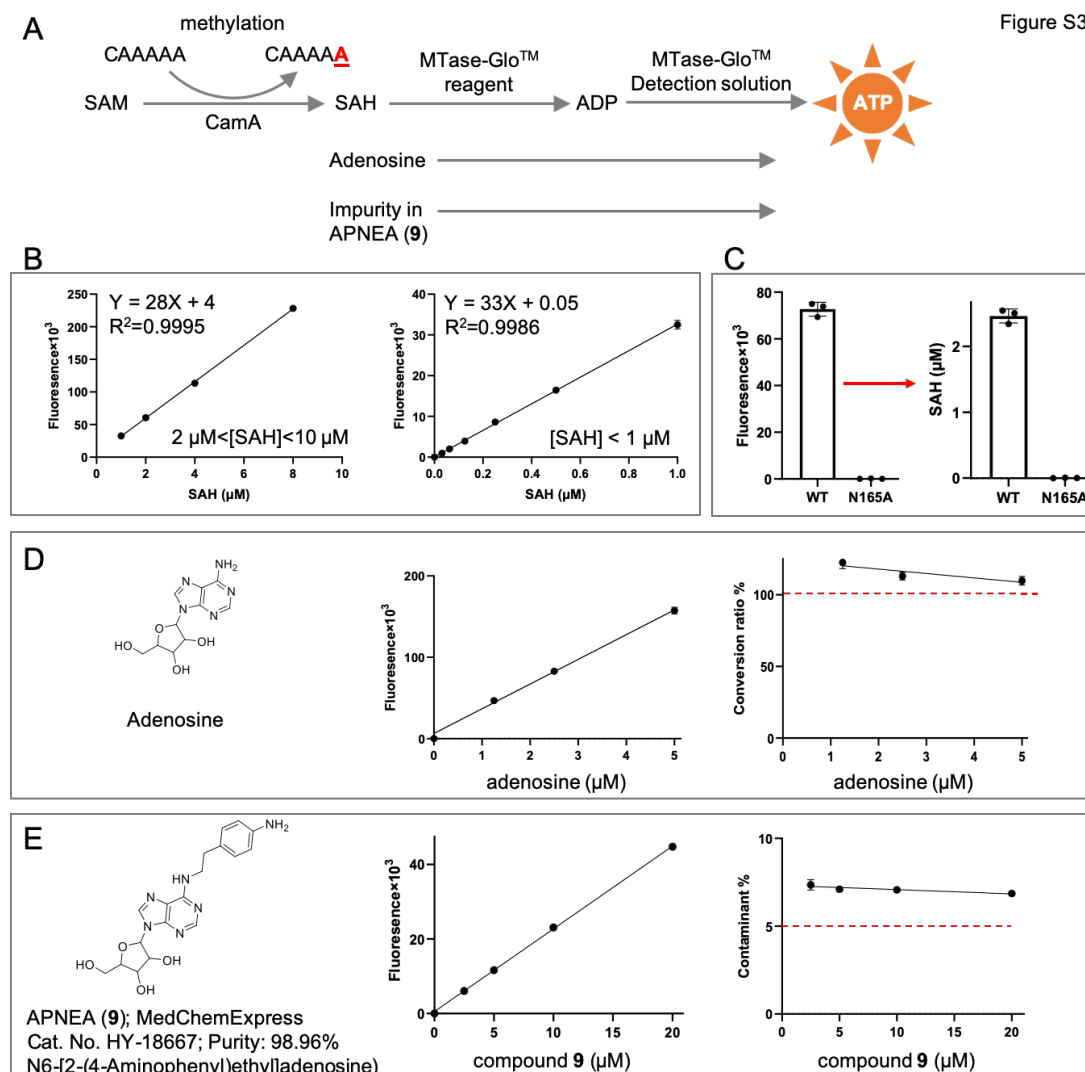

**Figure S3. APNEA (compound 9) contains an impurity that interferes with MTase-Glo™ assay.**

(A) Schematic steps of CamA-mediated methylation. After the methylation reaction is complete, the MTase-Glo™ Reagent and Detection Solution (provided by Promega) convert SAH to ATP and measure the light from the luciferase reaction. (B) Standard curves for the Promega bioluminescence assay as a function of SAH concentrations in the range of above or below 1  $\mu\text{M}$  (left and right panels) ( $N = 2$ ). (C) Enzymatic activity of CamA wild-type (WT) and catalytic mutant (N165A) (left: the raw reading of luminescence signal; right: converted SAH concentration). There is no component in the methylation reaction that interference with the luminescent assay. (D) Adenosine acts like SAH in the MTase-Glo™ assay which converts nearly 100% of adenosine to ATP. (E) APNEA (compound 9) contains a  $>5\%$  impurity which interferes with MTase-Glo™ assay.

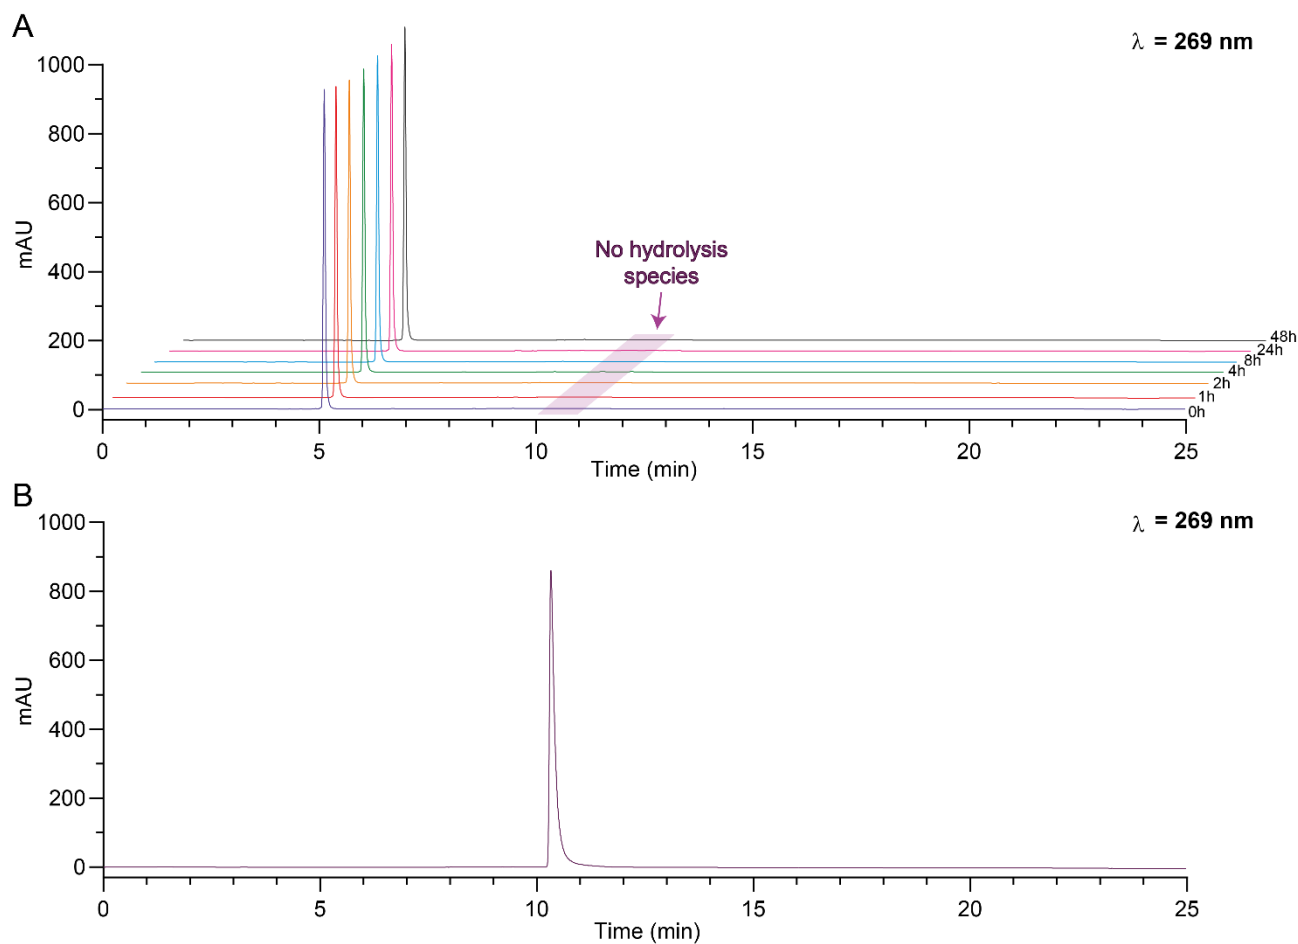

**Figure S4.** Evaluation of compound **39** stability in assay buffer. We assessed the stability of compound **39** in a water solution containing 50 mM Tris-HCl pH 7.5 and 100 mM NaCl, similar to the enzymatic inhibition assay buffer. Specifically, we dissolved the compound in the buffer ( $c = 0.5$  mg/mL), incubated the solution at 37 °C and then performed analytical HPLC under the same conditions described in the Experimental section. HPLC runs were performed at time 0 and after 1, 2, 4, 8, 24, and 48 h of incubation (**A**). As a comparison, the hydrolysis/deprotection product of **39**, i.e. compound **42**, was also dissolved in the same buffer and analyzed via HPLC (**B**). There is no significant difference between the HPLC profiles of compound **39** at different incubation times and no hydrolysis product formation was observed at any time point, thereby compound **39** is chemically stable under the tested conditions. This observation agrees with that *tert*-butyl carbamate moiety is resistant to hydrolysis under physiological pH conditions<sup>8</sup>. Indeed, given the presence of the additional oxygen, three possible resonance structures can be found which contribute to the increased stability of carbamates compared to amides<sup>9</sup>. Moreover, carbamates are being increasingly chosen as peptide mimetic groups because of their metabolic stability and many examples of carbamate-containing drugs, such as the anthelmintic drugs albendazole and mebendazole, the chemotherapeutic mitomycin C, and the antiasthma agent zafirlukast<sup>10</sup>.

## References

- (1) Griffiths, M. et al. Cloning of a human nucleoside transporter implicated in the cellular uptake of adenosine and chemotherapeutic drugs. *Nat Med.* 3(1): 89-93 (1997)
- (2) Gardner, N.M. and Broadley, K.J. Analysis of the atypical characteristics of adenosine receptors mediating negative inotropic and chronotropic responses of guinea-pig isolated atria and papillary muscles. *Br. J. Pharmacol.* 127(7): 1619-2 (1999)
- (3) Deguchi, H. et al. Adenosine regulates tissue factor expression on endothelial cells. *Thromb. Res.* 91(2): 57-64 (1998)
- (4) Borowicz K. K. et al. N6-2-(4-aminophenyl)ethyl-adenosine enhances the anticonvulsive activity of antiepileptic drugs. *Eur J Pharmacol.* 327(2-3):125-133 (1997)
- (5) Fozard J.R. et al. Mast cell degranulation following adenosine A3 receptor activation in rats. *Eur. J. Pharmacol.* 298(3):293-7 (1996)
- (6) Chou, A. H. et al. T1-11 and JMF1907 ameliorate polyglutamine-expanded ataxin-3-induced neurodegeneration, transcriptional dysregulation and ataxic symptom in the SCA3 transgenic mouse. *Neuropharmacology* 99:308-17 (2015)
- (7) Pires, D. E. V. et al. pkCSM: Predicting Small-Molecule Pharmacokinetic and Toxicity Properties Using Graph-Based Signatures. *J. Med. Chem.* 58 (9):4066-4072 (2015).
- (8) Wuts, P. G. M. and Greene, T. W. Chapter 7: Protection for the Amino Group in Protective Groups in *Organic Synthesis*, 4th ed.; Wiley: Hoboken, NJ (2006)
- (9) Cox, C. and Lectka, T. Solvent Effects on the Barrier to Rotation in Carbamates. *J. Org. Chem.* 63, 2426-2427 (1998)
- (10) Gosh, A. K. and Brindisi, M. Organic carbamates in drug design and medicinal chemistry. *J. Med. Chem.* 58, 2895-2940 (2015)

**1**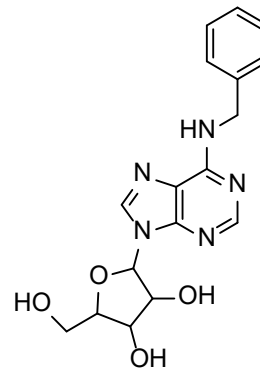

1 #1-30 RT: 0.02-0.41 AV: 30 NL: 2.45E7 T: FTMS  
 + p ESI Full ms [100.00-2000.00]

Full scan ESI(+)

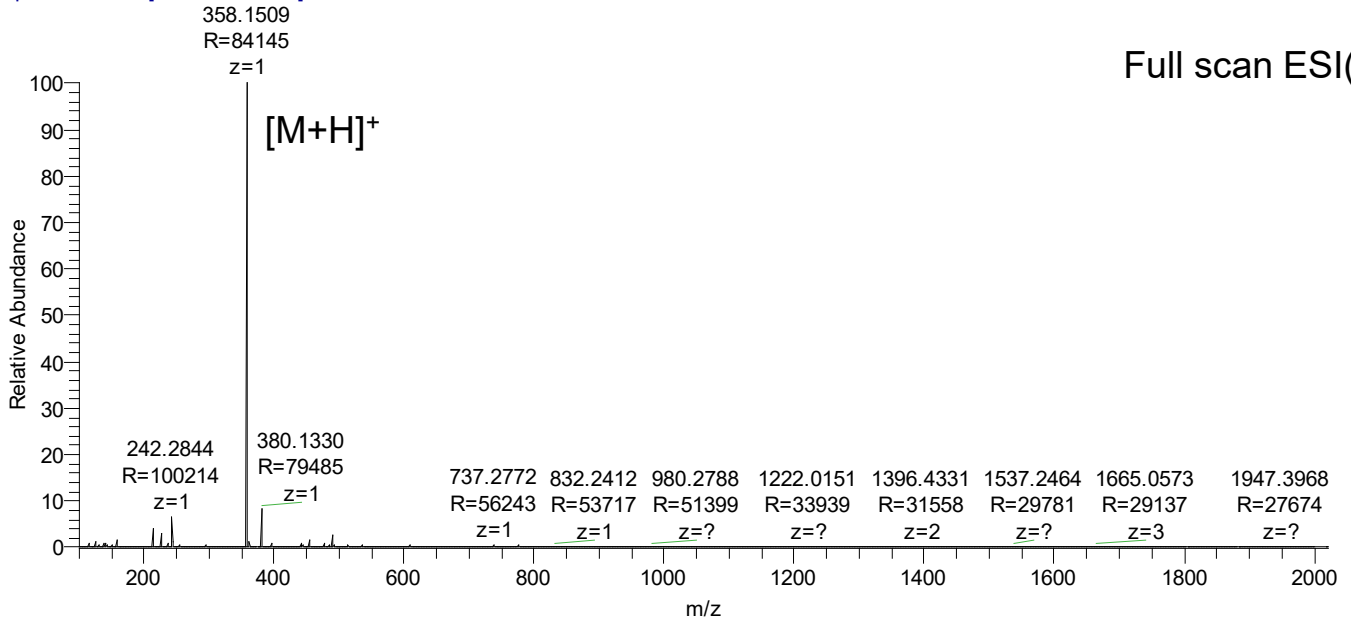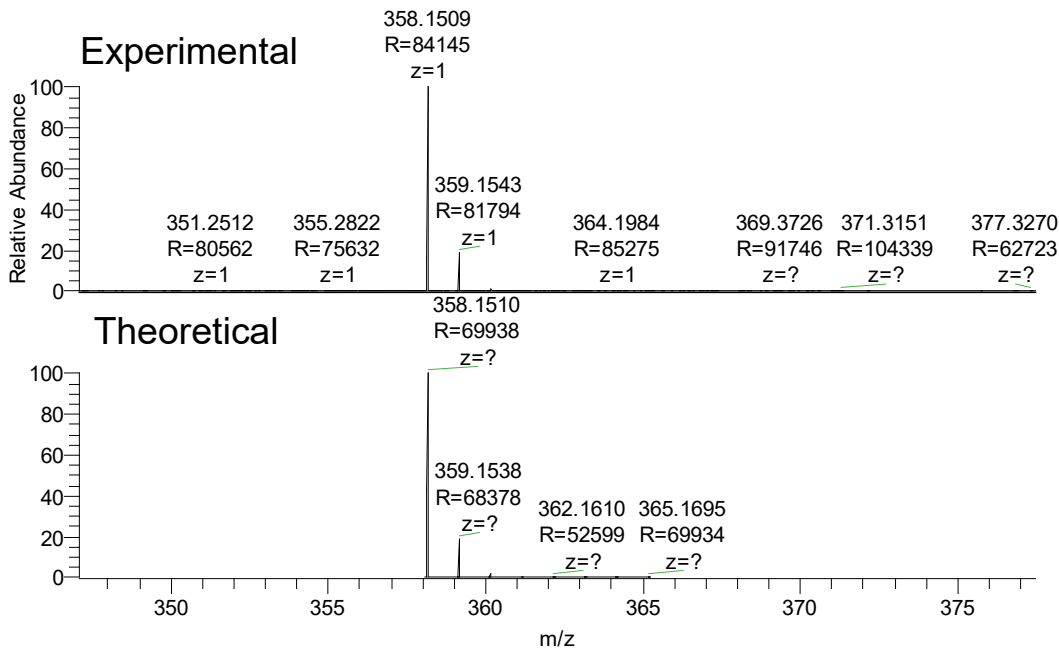

NL:  
 2.45E7  
 #1-30 RT:  
 0.02-0.41 AV: 30 T: FTMS +  
 p ESI Full ms  
 [100.00-2000.00]

NL:  
 1.90E4  
 C<sub>17</sub>H<sub>19</sub>N<sub>5</sub>O<sub>4</sub> +H:  
 C<sub>17</sub>H<sub>20</sub>N<sub>5</sub>O<sub>4</sub>  
 p (gss, s /p:40) Chrg 1  
 R: 70000 Res .Pwr . @FWHM

$\Delta m = 0.28$  ppm

**1**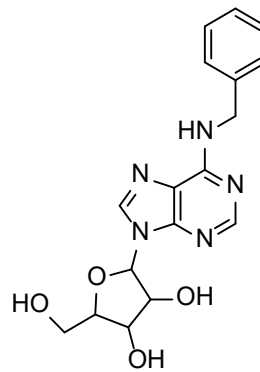 $\lambda = 254 \text{ nm}$ 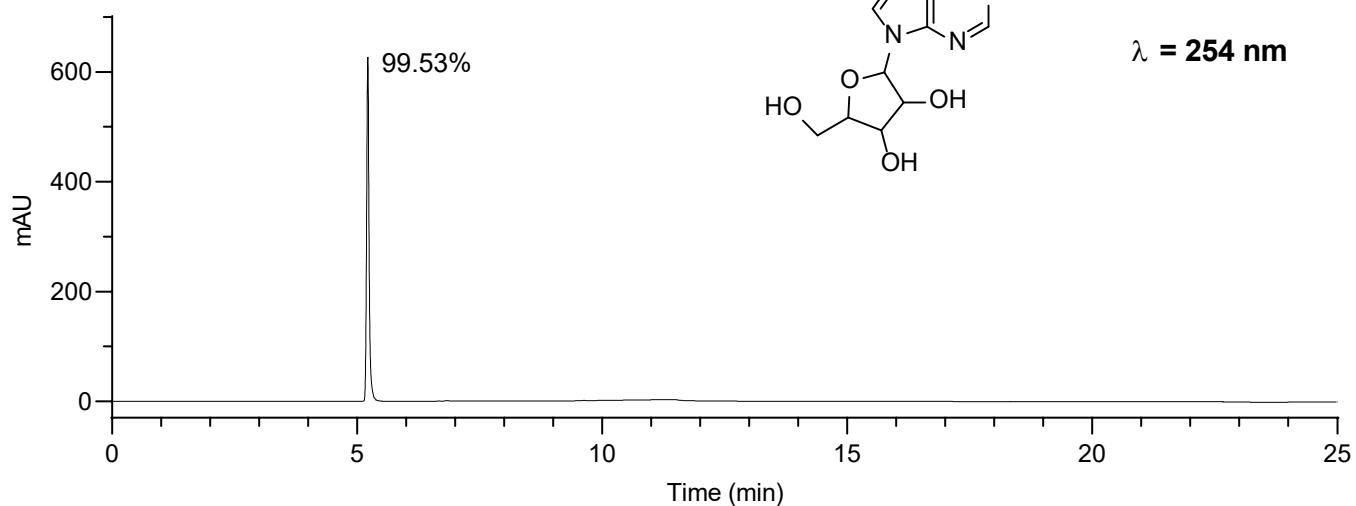 $\lambda = 269 \text{ nm}$ 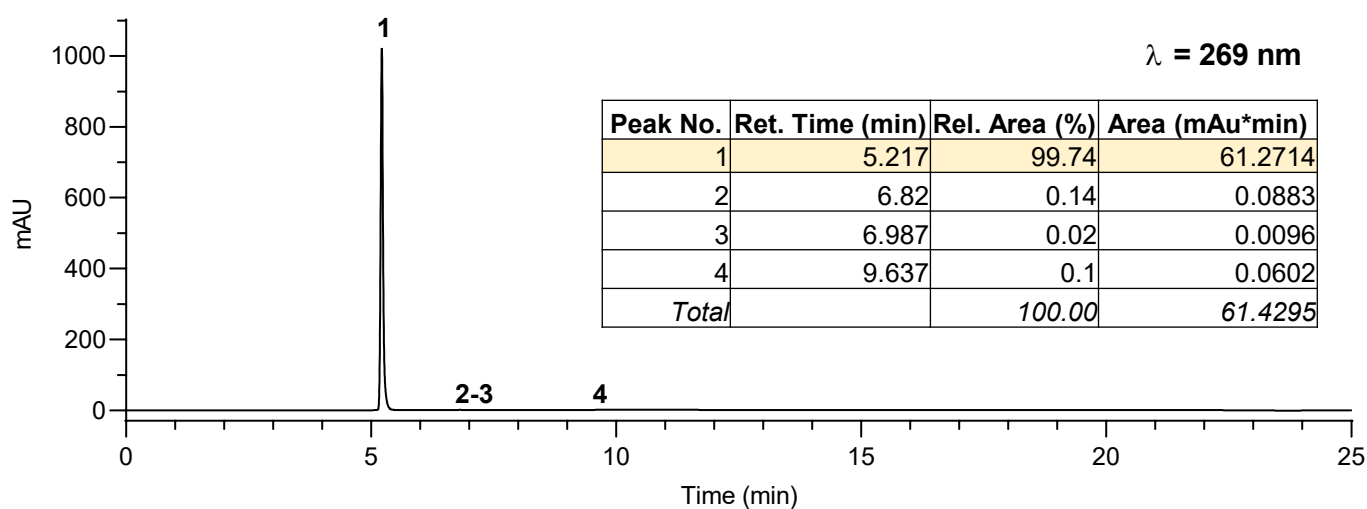 $\lambda = 280 \text{ nm}$ 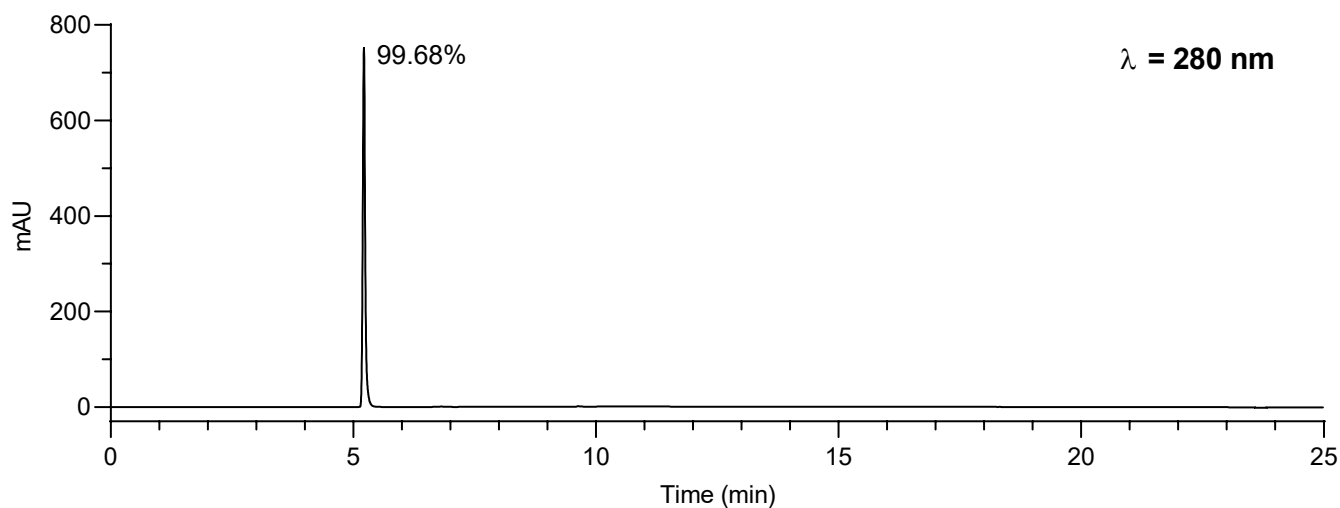

2

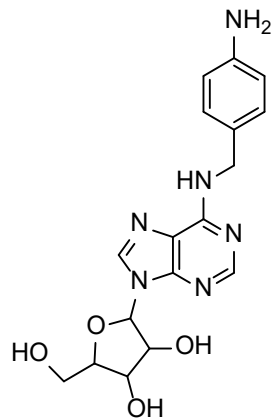

2 #1-17 RT: 0.02-0.23 AV: 17 NL: 5.55E7 T: FTMS  
+ p ESI Full ms [100.00-2000.00]

Full scan ESI(+)

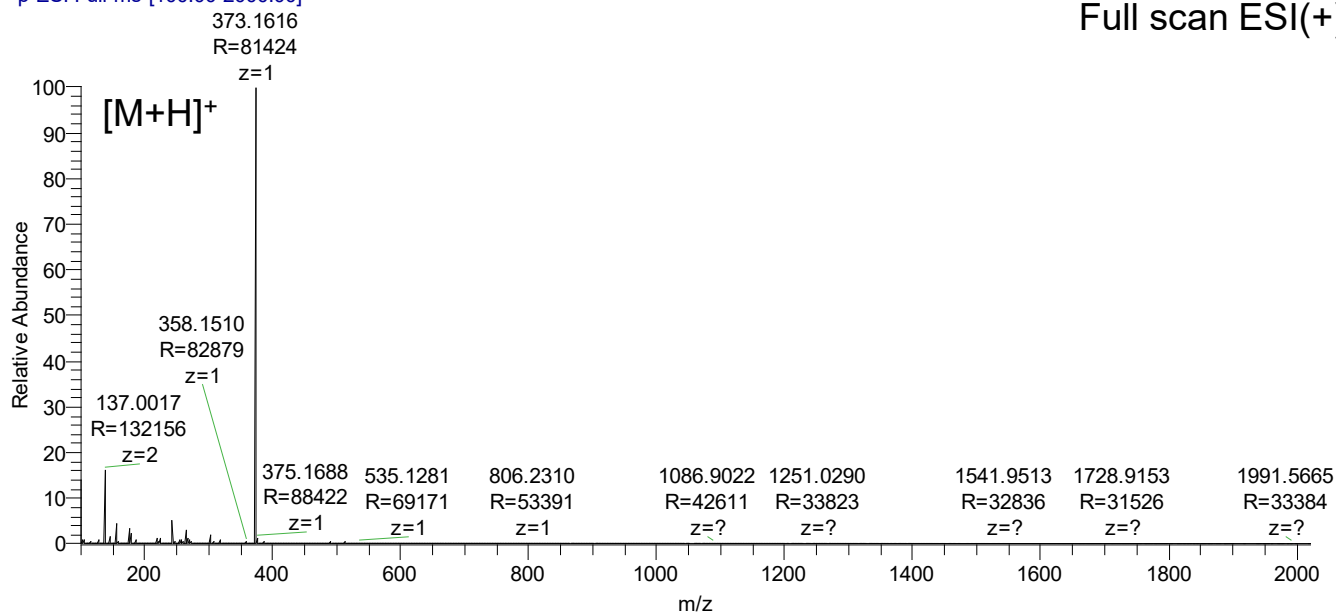

Experimental

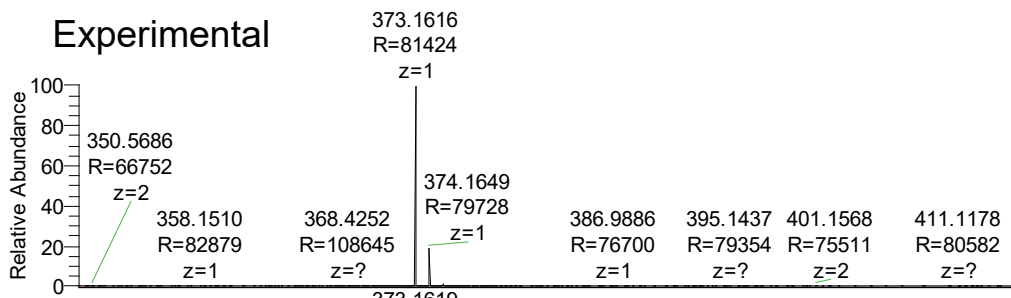

NL:  
5.55E7  
2#1-17 RT:  
0.02-0.23 AV: 17 T: FTMS +  
p ESI Full ms  
[100.00-2000.00]

Theoretical

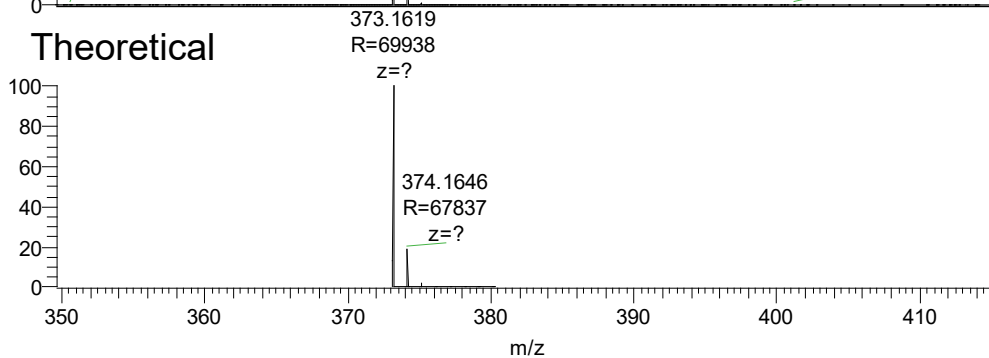

NL:  
1.89E4  
C<sub>17</sub>H<sub>20</sub>N<sub>6</sub>O<sub>4</sub> +H:  
C<sub>17</sub>H<sub>21</sub>N<sub>6</sub>O<sub>4</sub>  
p (gss, s /p:40) Chrg 1  
R: 70000 Res .Pwr. @FWHM

$\Delta m = 0.80 \text{ ppm}$

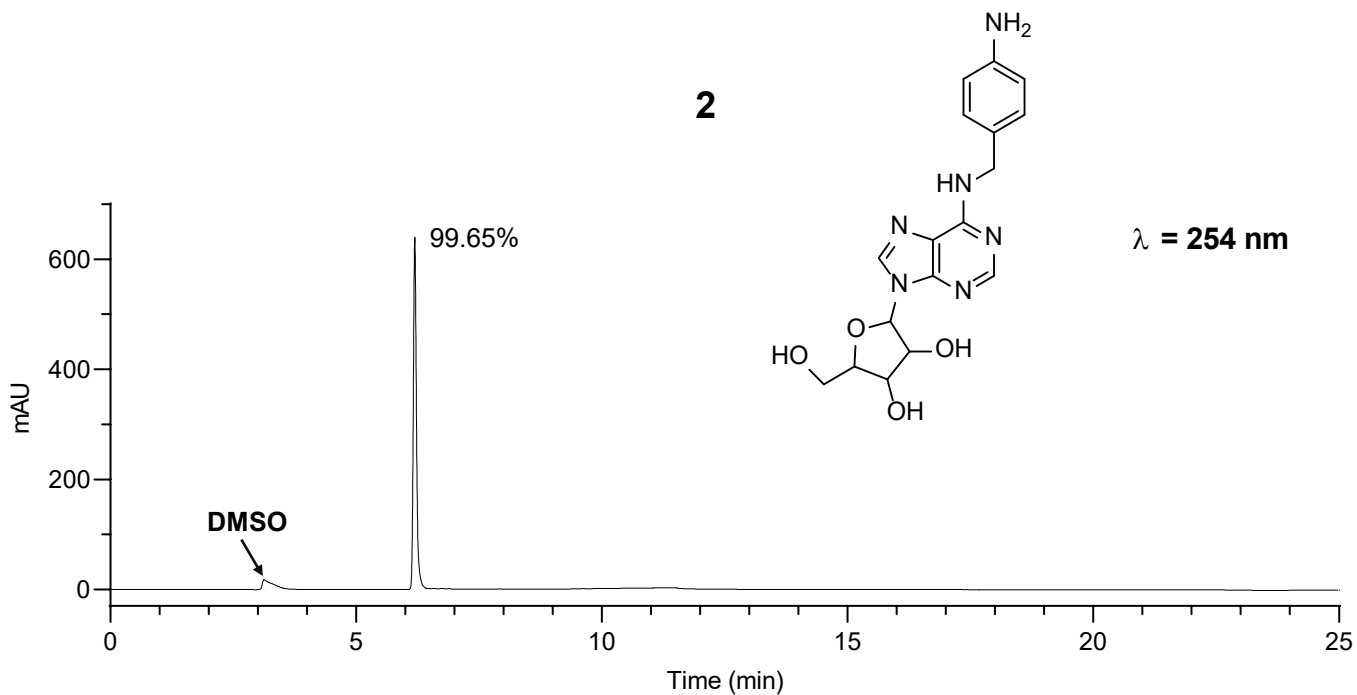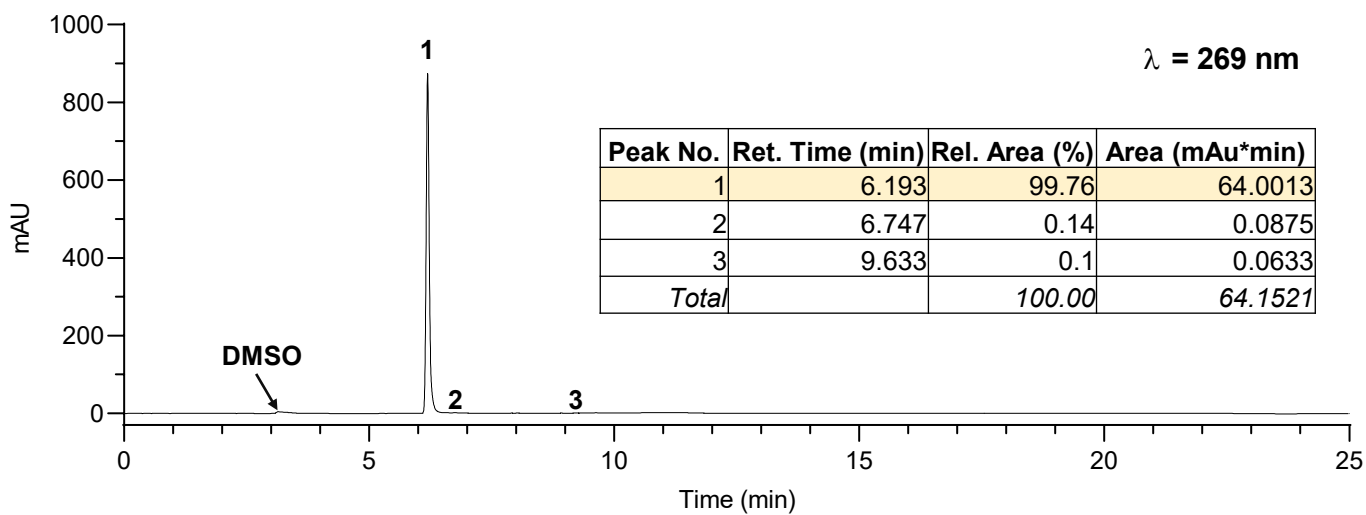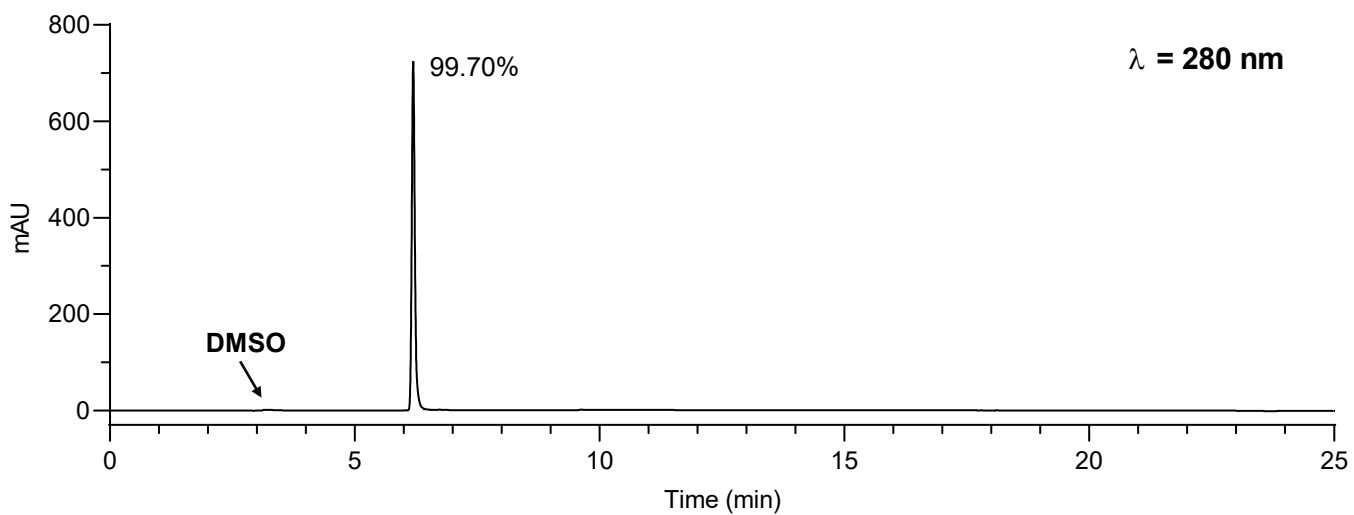

3

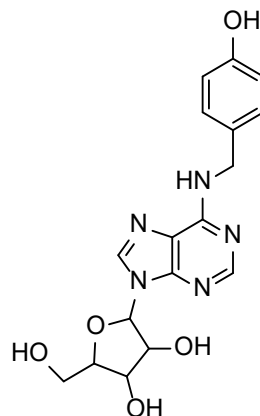

3 #2-30 RT: 0.03-0.42 AV: 29 NL: 1.36E7 T: FTMS  
+ p ESI Full ms [100.00-2000.00]

Full scan ESI(+)

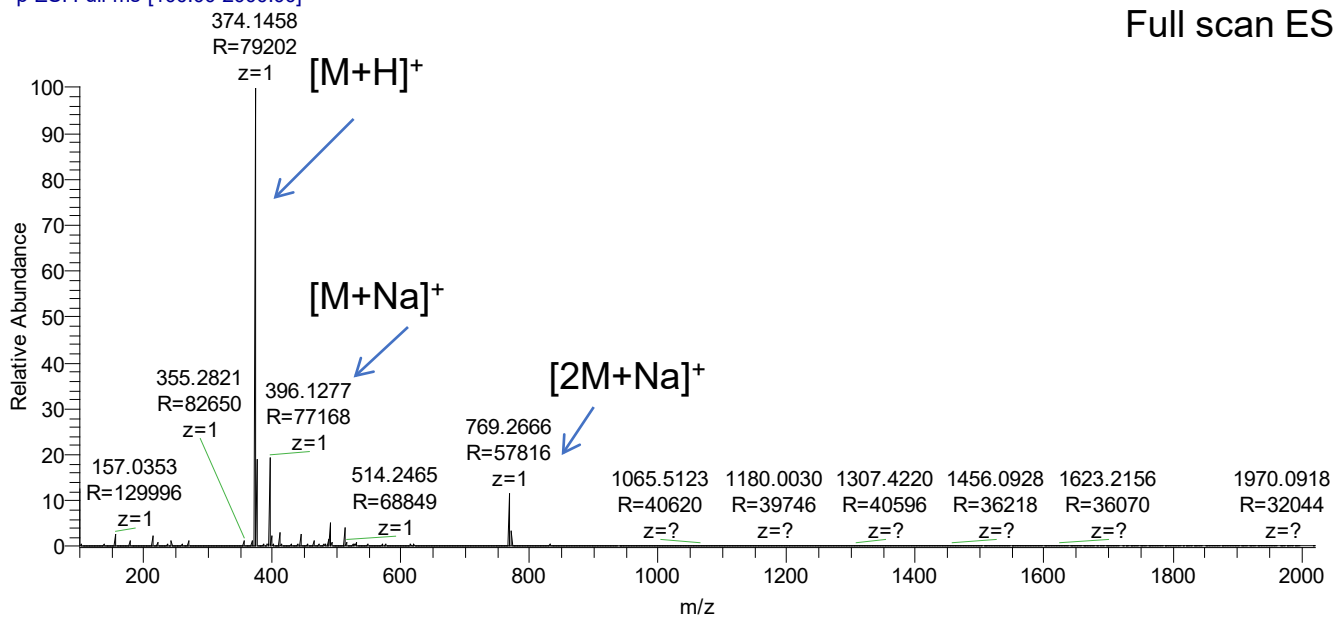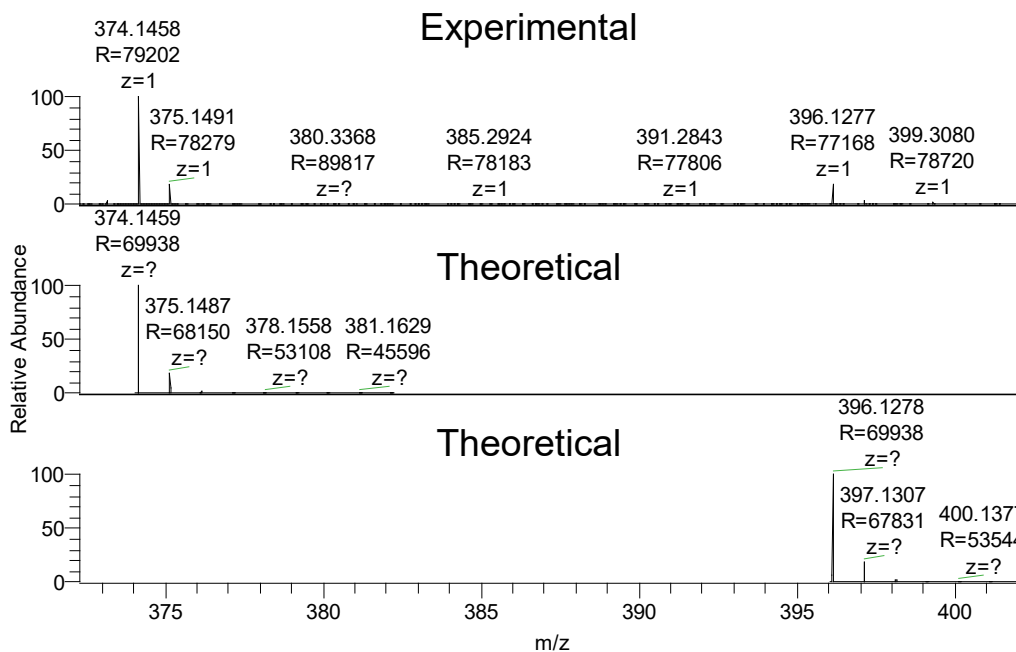

NL:  
1.36E7  
3#2-30 RT:  
0.03-0.42 AV: 29 T: FTMS +  
p ESI Full ms  
[100.00-2000.00]

NL:  $\Delta m = 0.27 \text{ ppm}$   
1.89E4

$C_{17}H_{19}N_5O_5 + H$ :  
 $C_{17}H_{20}N_5O_5$   
p (gss, s /p:40) Chrg 1  
R: 70000 Res .Pwr . @FWHM

NL:  $\Delta m = 0.25 \text{ ppm}$   
1.89E4

$C_{17}H_{19}N_5O_5 + Na$ :  
 $C_{17}H_{19}N_5O_5 Na_1$   
p (gss, s /p:40) Chrg 1  
R: 70000 Res .Pwr . @FWHM



**3**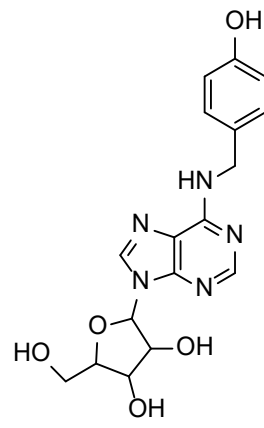 $\lambda = 254 \text{ nm}$ 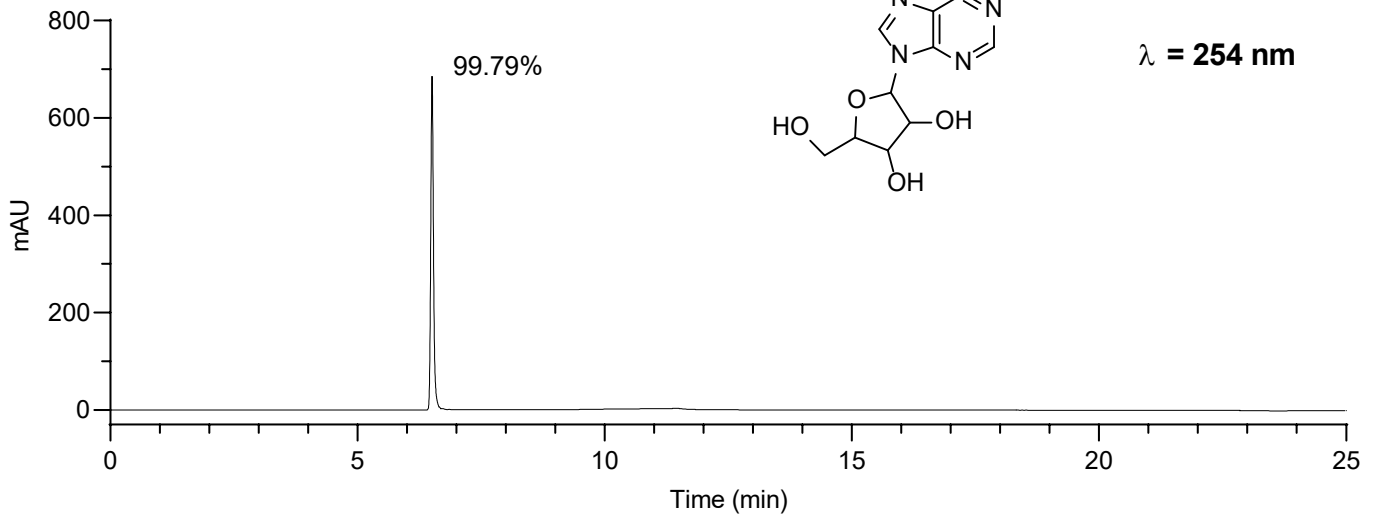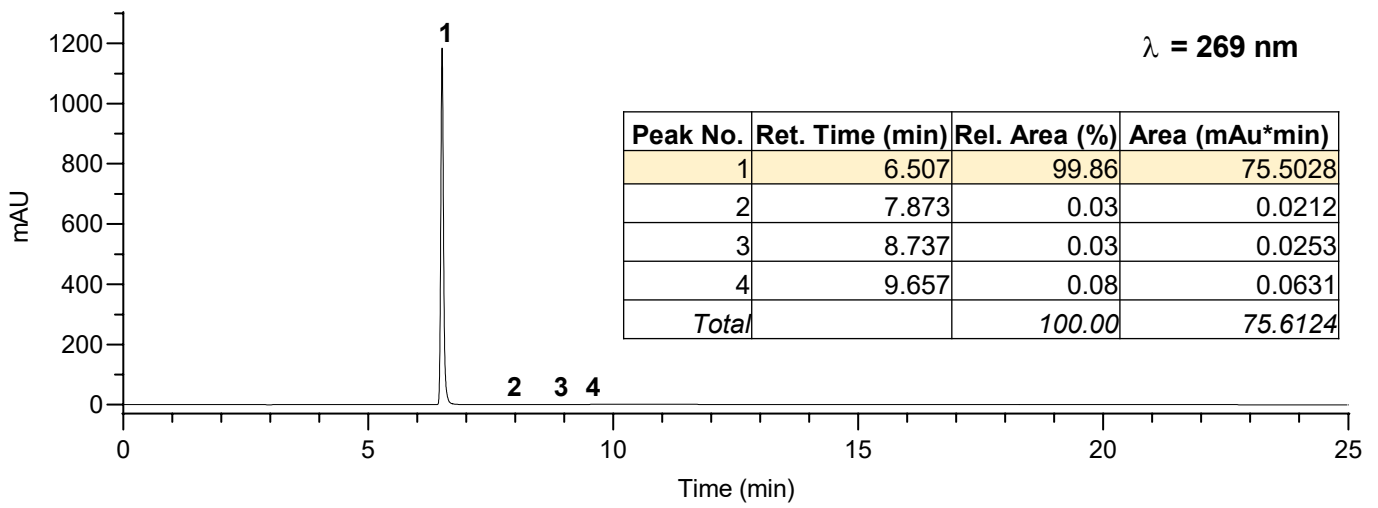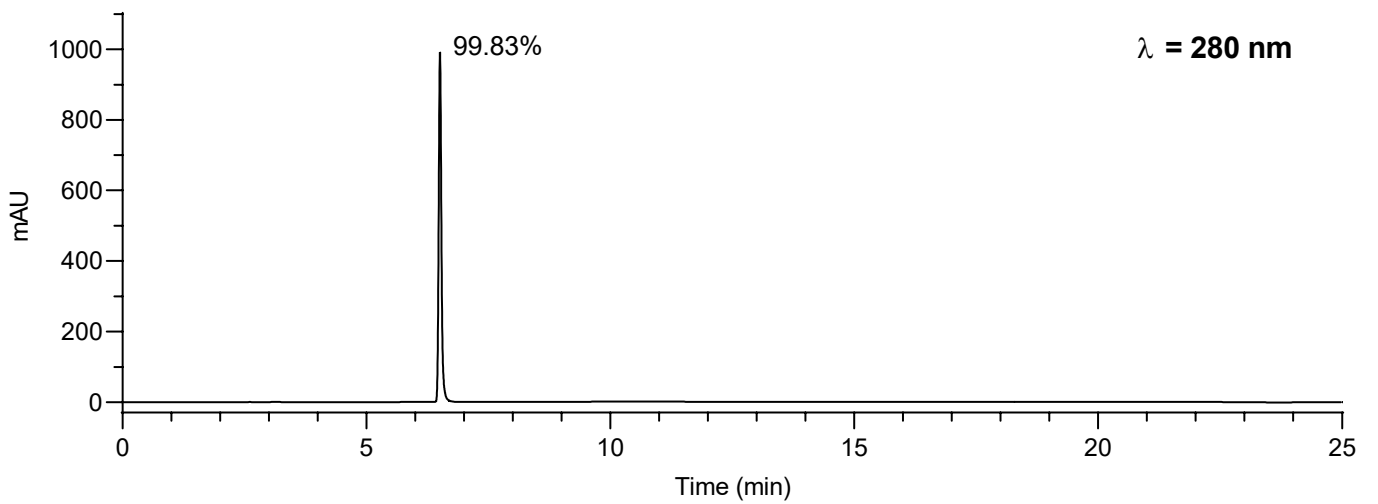

4

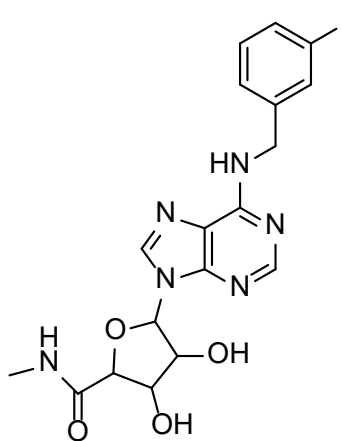

4 #1-10 RT: 0.02-0.14 AV: 10 NL: 6.90E7 T: FTMS  
+ p ESI Full ms [100.00-2000.00]

Full scan ESI(+)

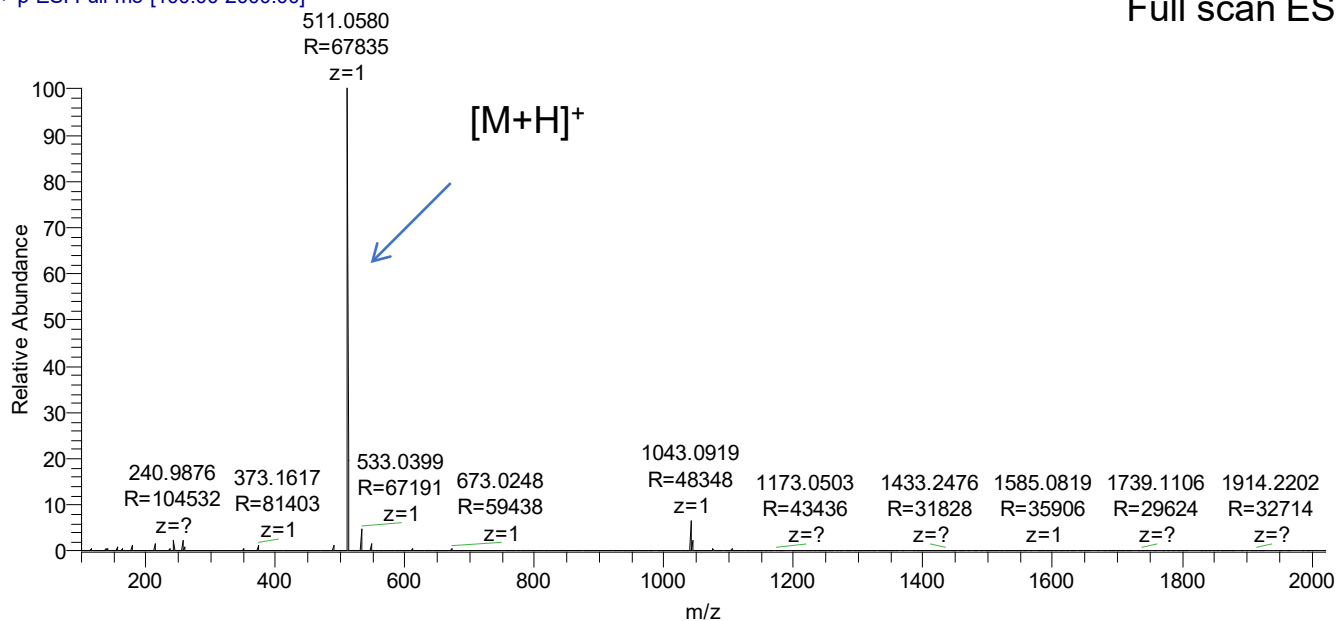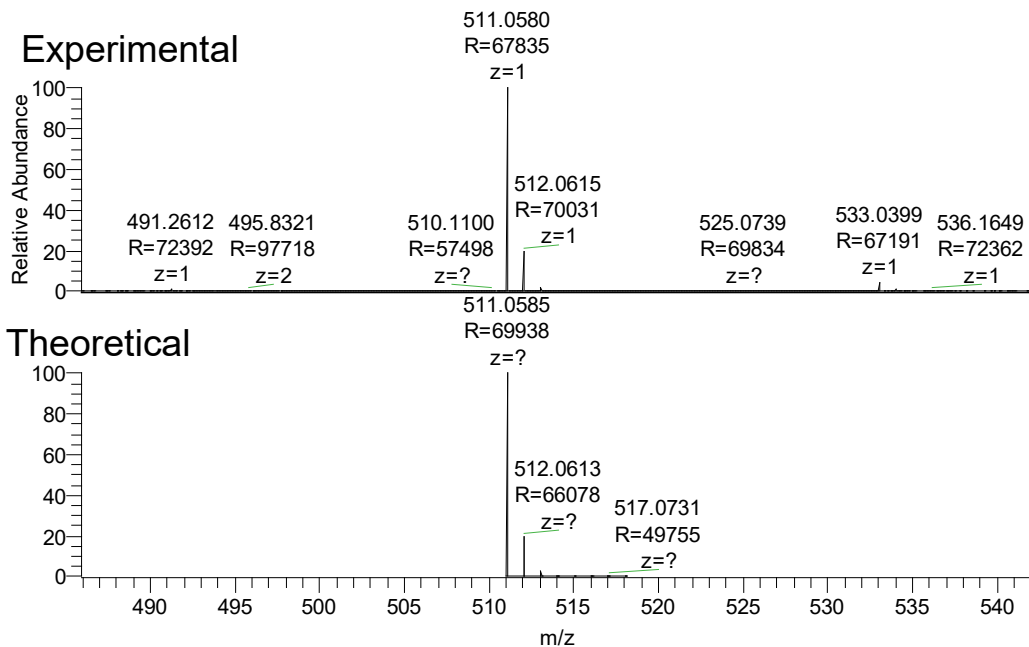

NL:  
6.90E7  
4#1-10 RT:  
0.02-0.14 AV: 10 T: FTMS +  
p ESI Full ms  
[100.00-2000.00]

NL:  
1.87E4  
C<sub>18</sub>H<sub>19</sub>N<sub>6</sub>O<sub>4</sub> +H:  
C<sub>18</sub>H<sub>20</sub>I<sub>1</sub>N<sub>6</sub>O<sub>4</sub>  
p (gss, s /p:40) Chrg 1  
R: 70000 Res .Pwr. @FWHM

$\Delta m = 0.98 \text{ ppm}$

**4**

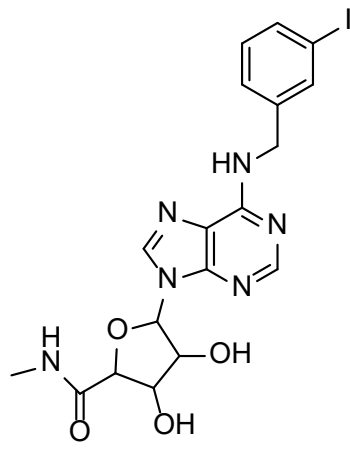

$\lambda = 254 \text{ nm}$

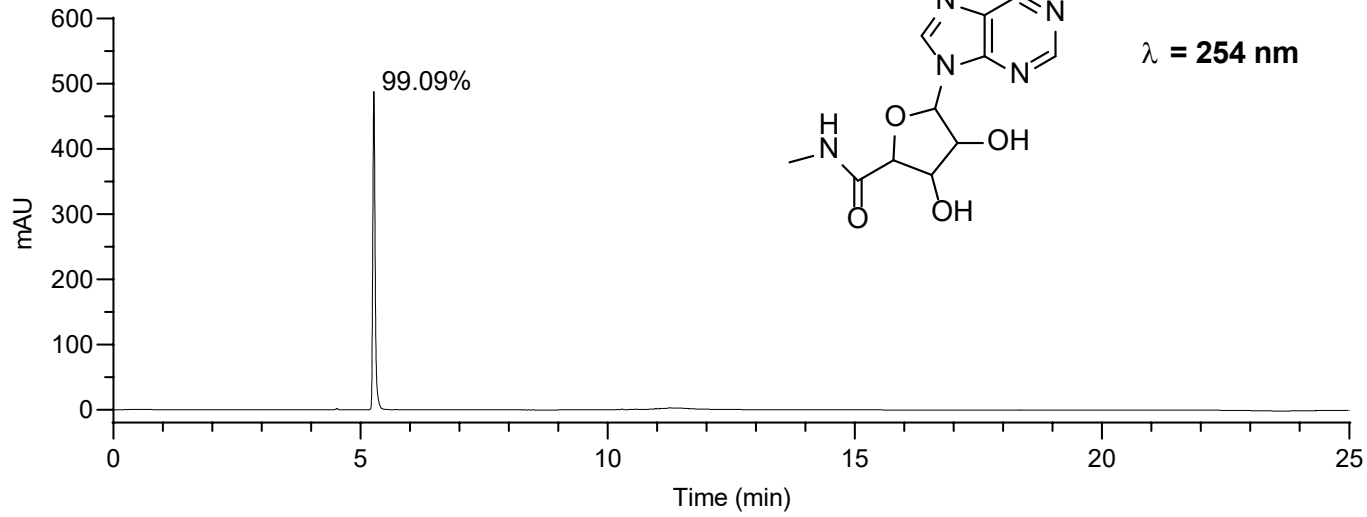

$\lambda = 269 \text{ nm}$

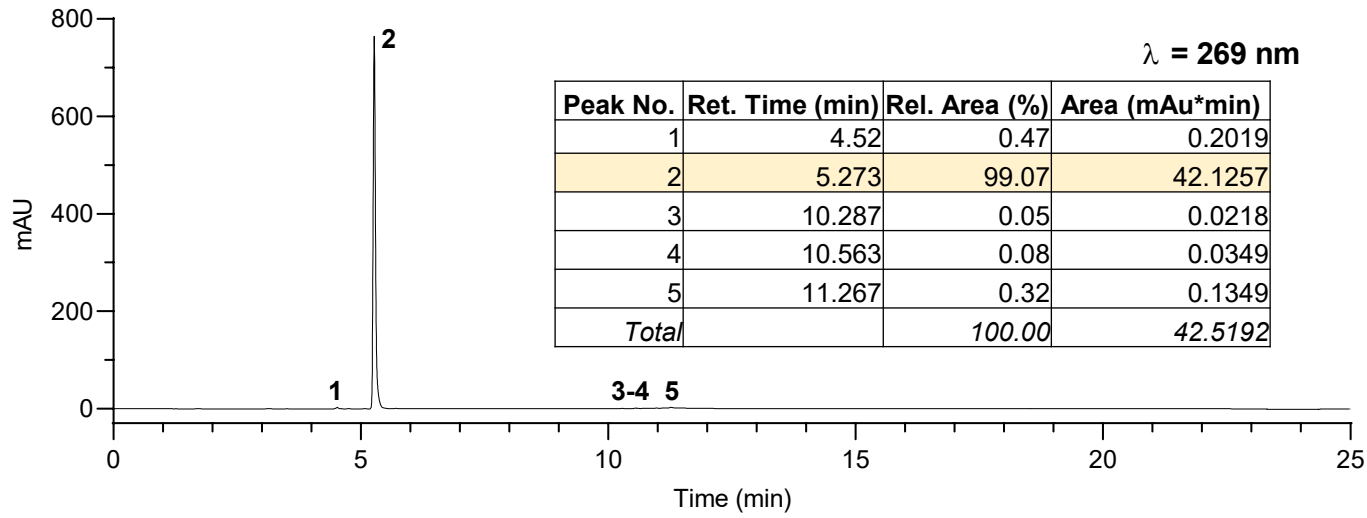

$\lambda = 280 \text{ nm}$

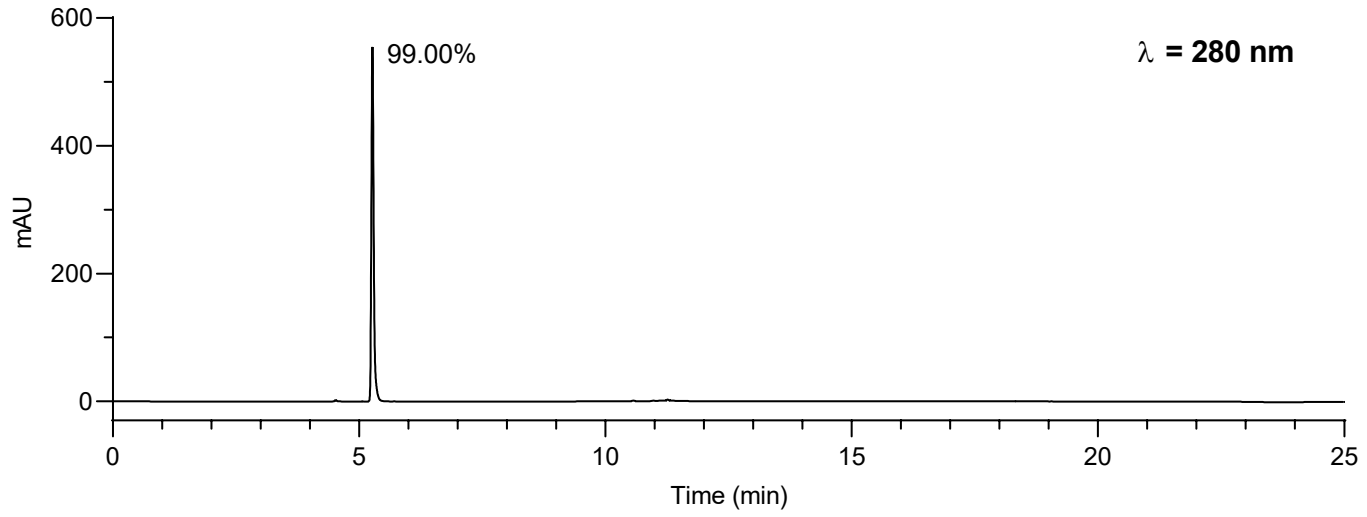

**5**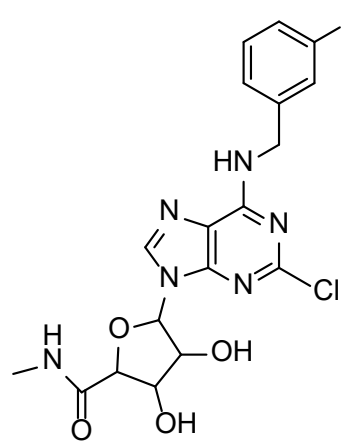

5 #1-30 RT: 0.02-0.41 AV: 30 NL: 1.49E7 T: FTMS  
+ p ESI Full ms [100.00-2000.00]

Full scan ESI(+)

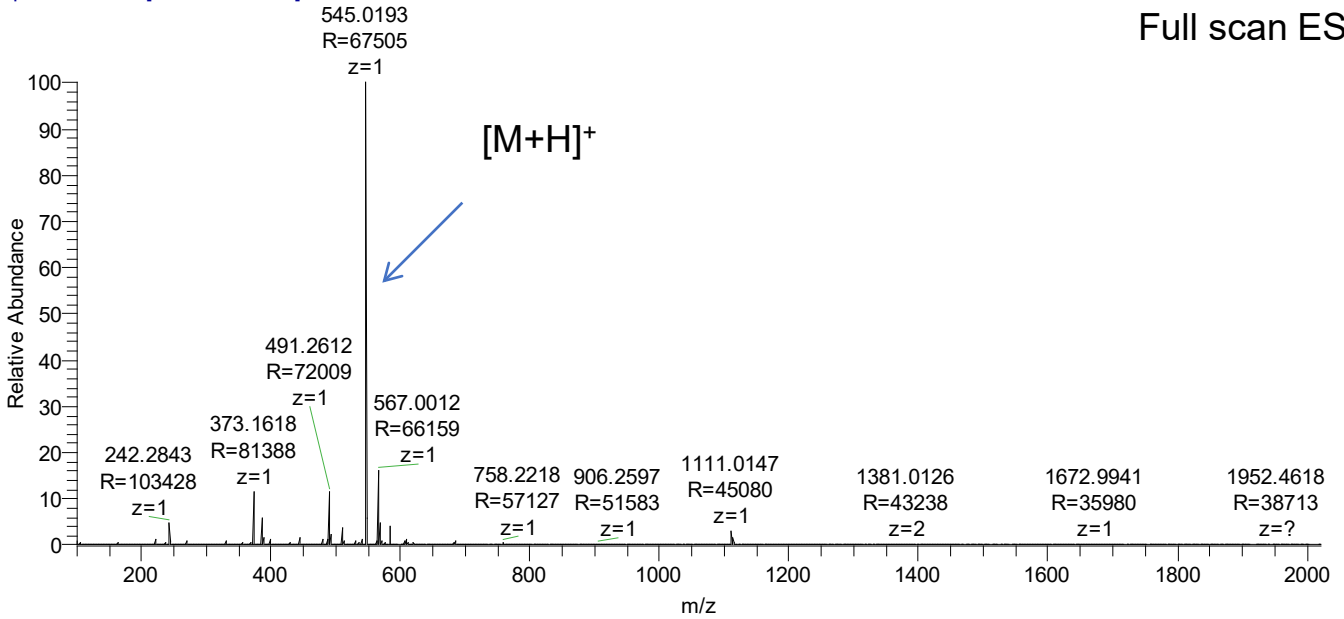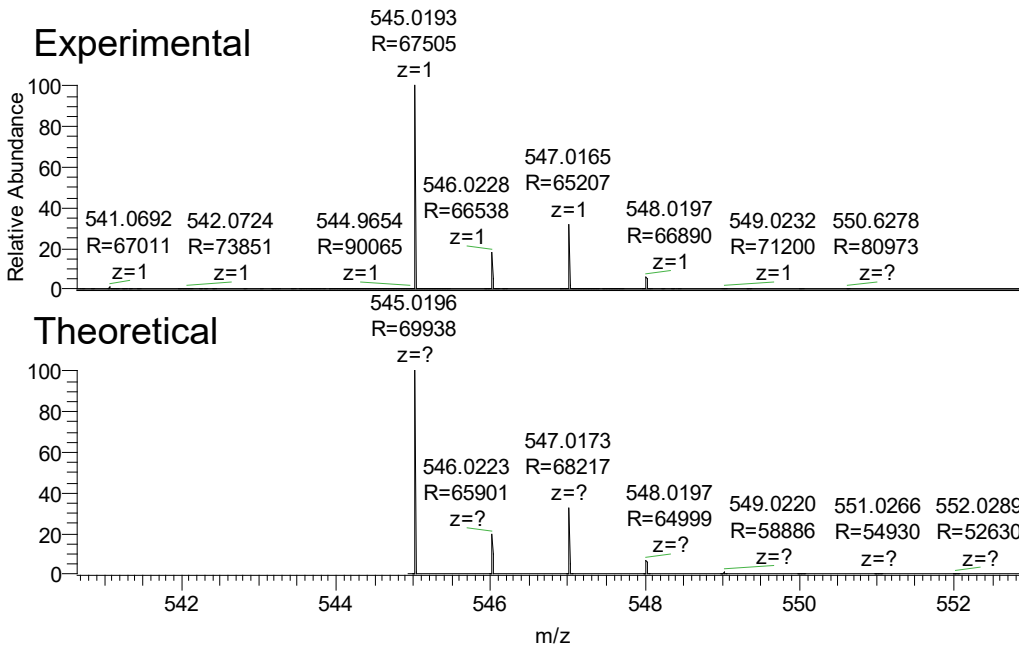

NL:  
1.49E7  
5#1-30 RT:  
0.02-0.41 AV: 30 T: FTMS +  
p ESI Full ms  
[100.00-2000.00]

NL:  
1.42E4  
C<sub>8</sub>H<sub>8</sub>ClIN<sub>6</sub>O<sub>4</sub> +H:  
C<sub>8</sub>H<sub>9</sub>Cl<sub>1</sub>I<sub>1</sub>N<sub>6</sub>O<sub>4</sub>  
p (gss, s /p:40) Chrg 1  
R: 70000 Res .Pwr. @FWHM

$\Delta m = 0.55 \text{ ppm}$

**5**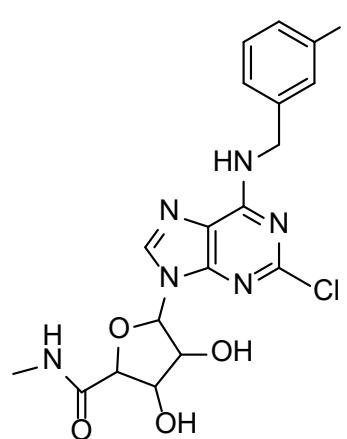 $\lambda = 254 \text{ nm}$ 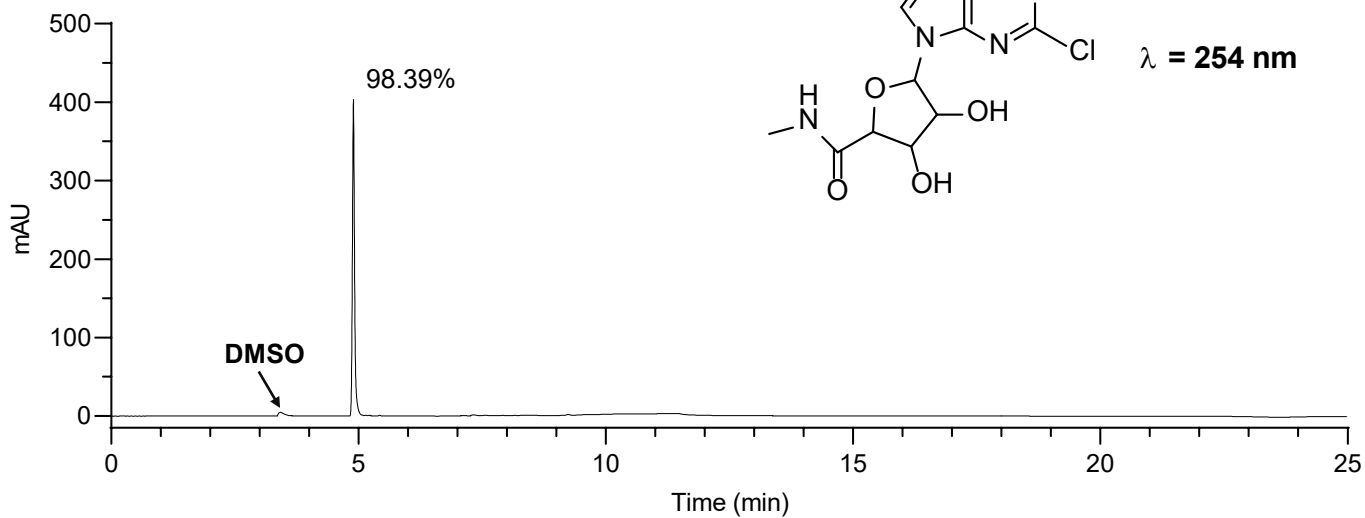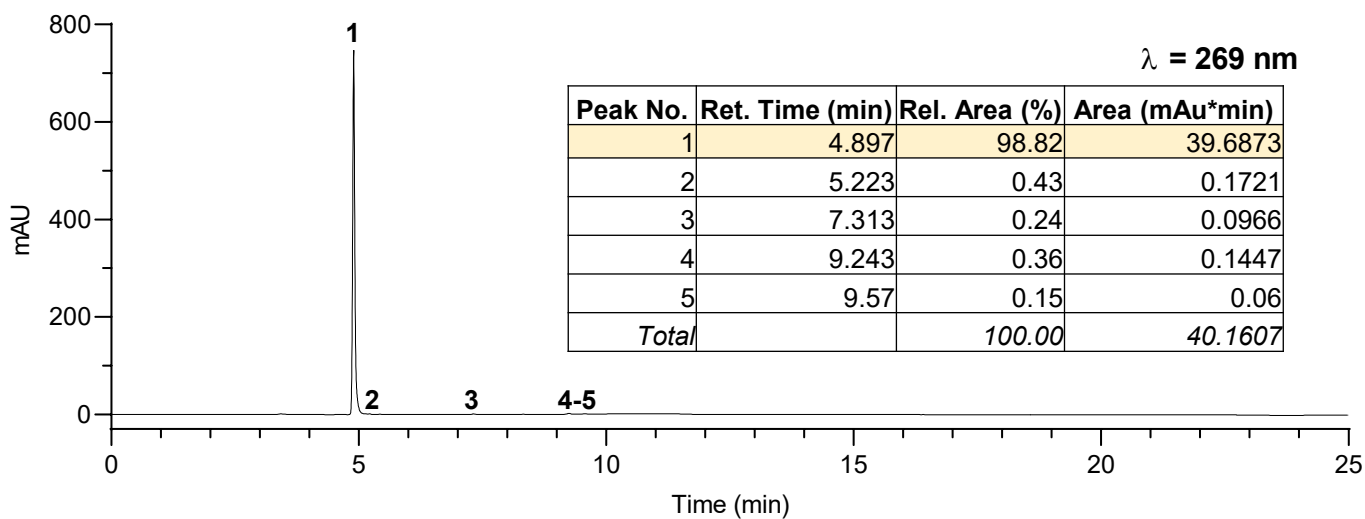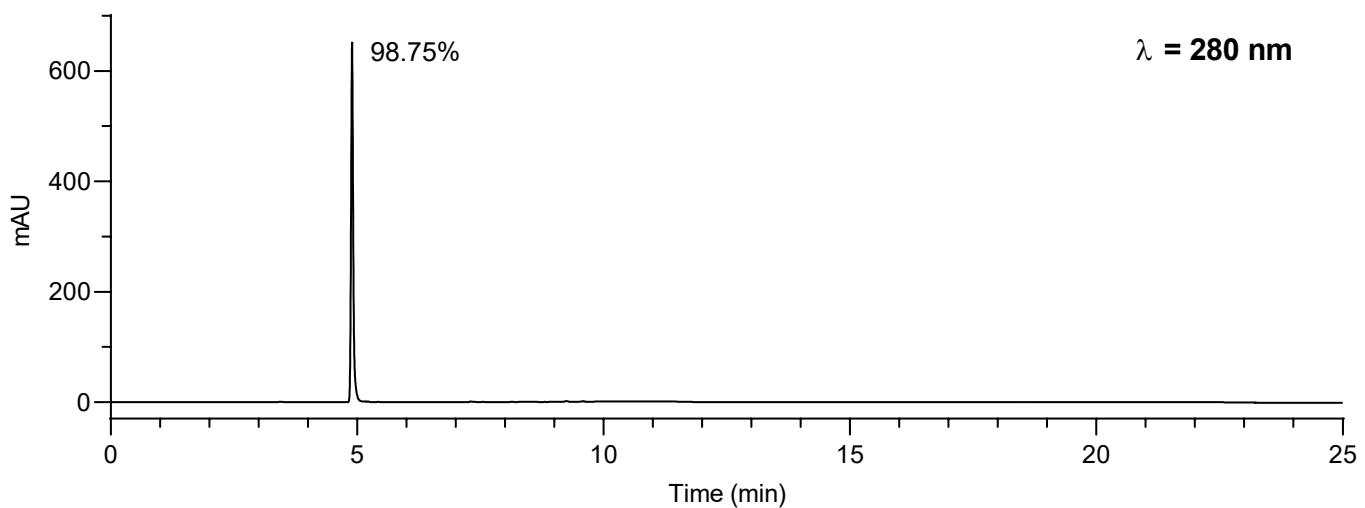

6

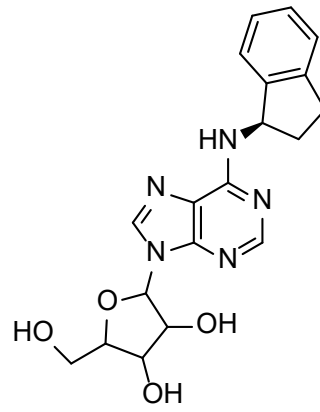

6 #1-30 RT: 0.02-0.41 AV: 30 NL: 3.52E7 T: FTMS

+ p ESI Full ms [100.00-2000.00]

Full scan ESI(+)

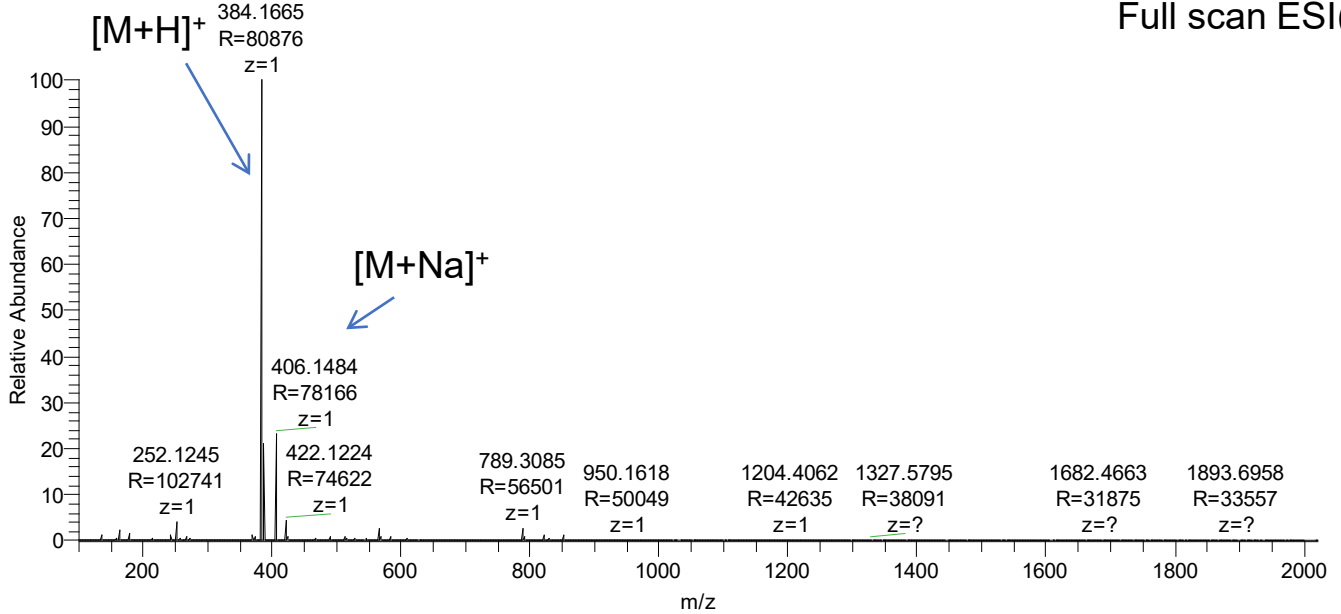

Experimental

NL:

3.52E7

6#1-30 RT:

0.02-0.41 AV: 30 T: FTMS +

p ESI Full ms

[100.00-2000.00]

NL:  $\Delta m = 0.26$  ppm

1.85E4

C<sub>8</sub>H<sub>21</sub>N<sub>5</sub>O<sub>4</sub> +H:C<sub>8</sub>H<sub>22</sub>N<sub>5</sub>O<sub>4</sub>

p (gss, s /p:40) Chrg 1

R: 70000 Res .Pwr . @FWHM

NL:  $\Delta m = 0.49$  ppm

1.86E4

C<sub>8</sub>H<sub>21</sub>N<sub>5</sub>O<sub>4</sub> +Na:C<sub>8</sub>H<sub>21</sub>N<sub>5</sub>O<sub>4</sub> Na<sub>1</sub>

p (gss, s /p:40) Chrg 1

R: 70000 Res .Pwr . @FWHM

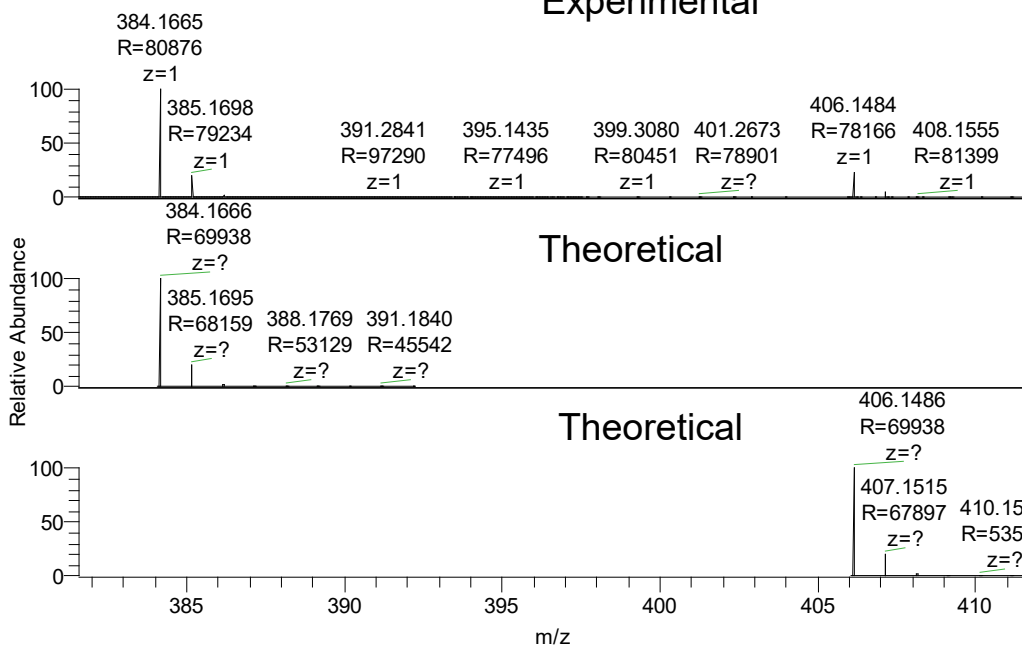

**6**

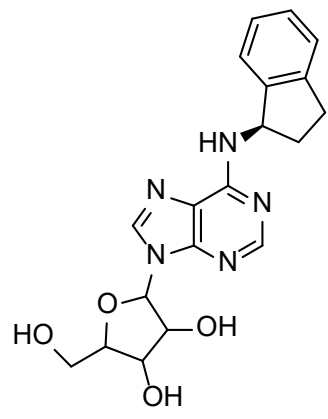

$\lambda = 254 \text{ nm}$

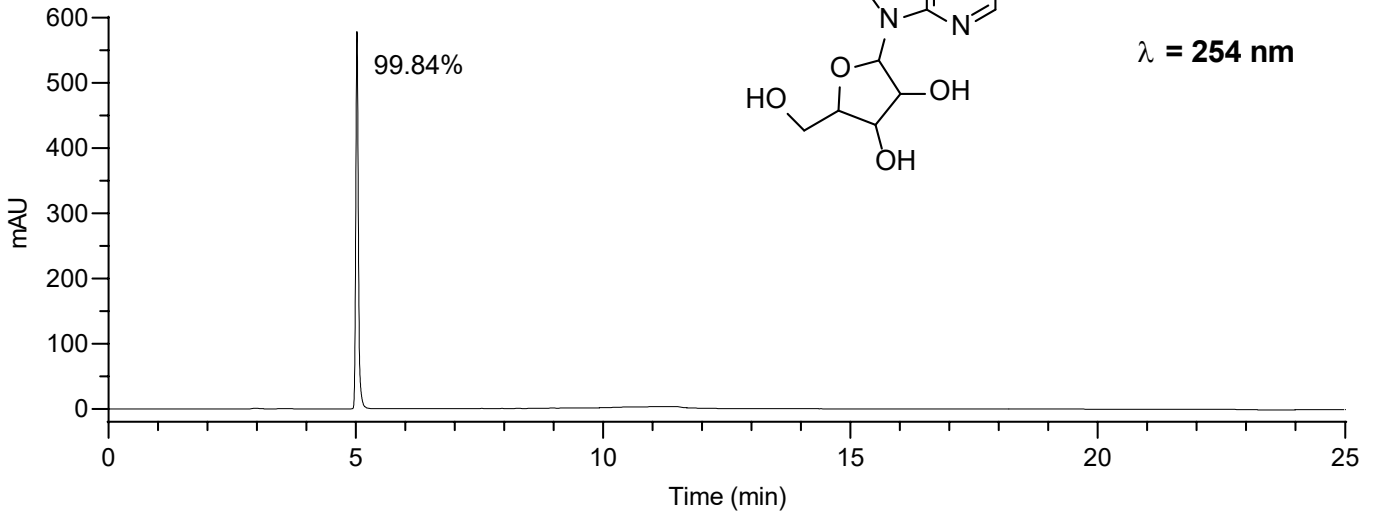

$\lambda = 269 \text{ nm}$

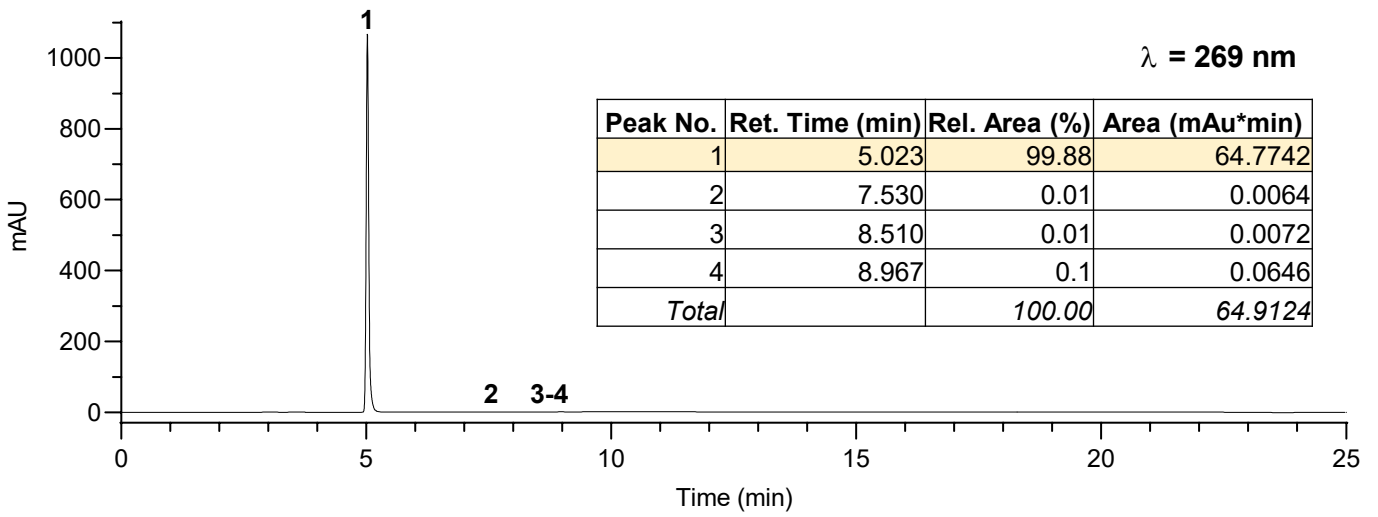

$\lambda = 280 \text{ nm}$

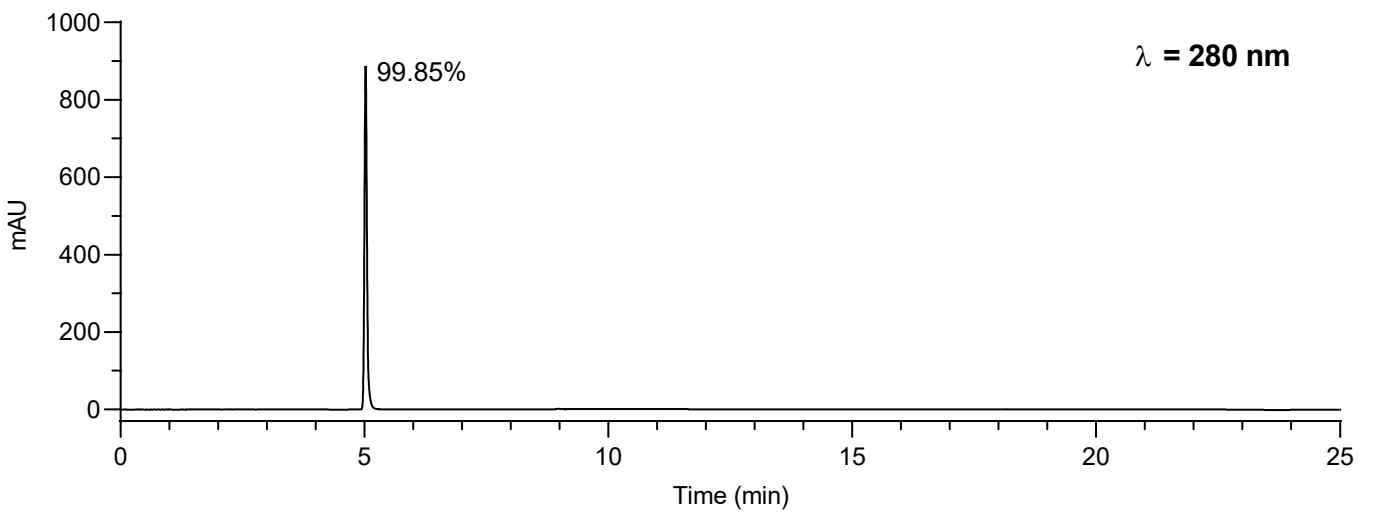

7

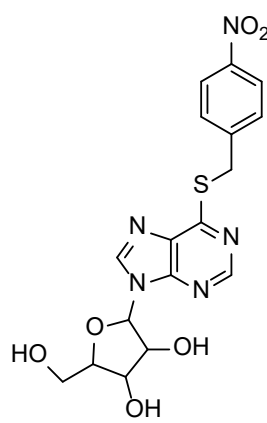

7 #1-29 RT: 0.02-0.40 AV: 29 NL: 2.02E7 T: FTMS  
+ p ESI Full ms [100.00-2000.00]

Full scan ESI(+)

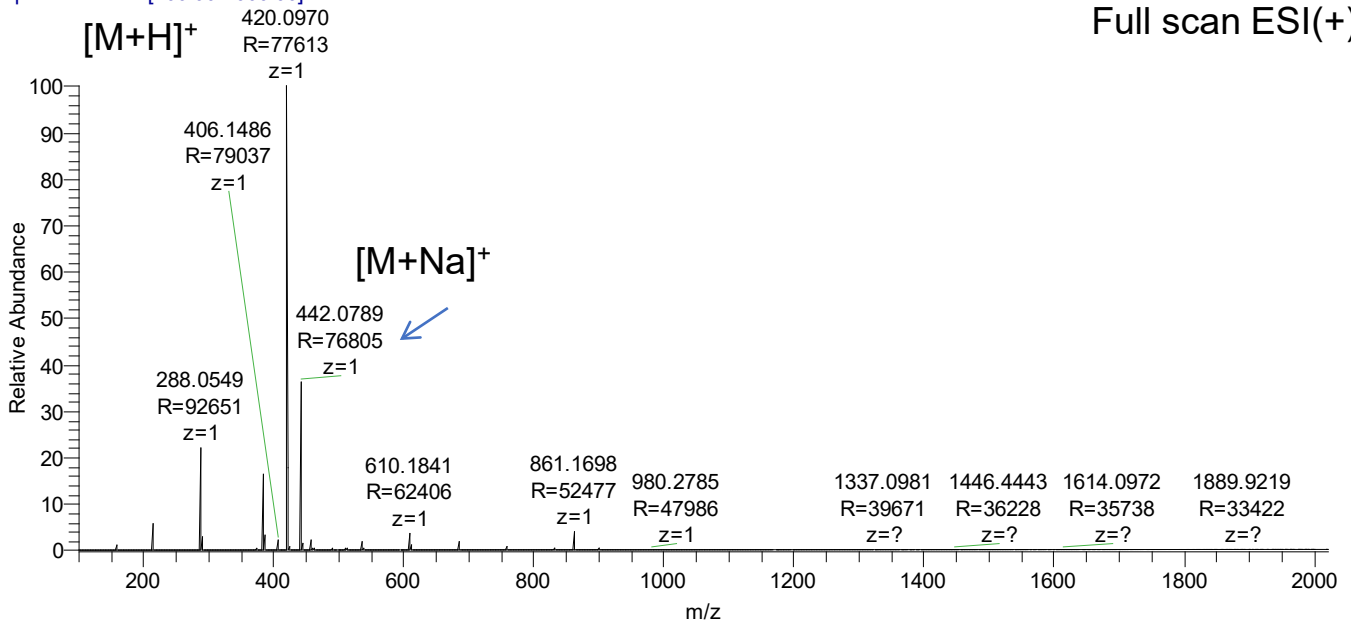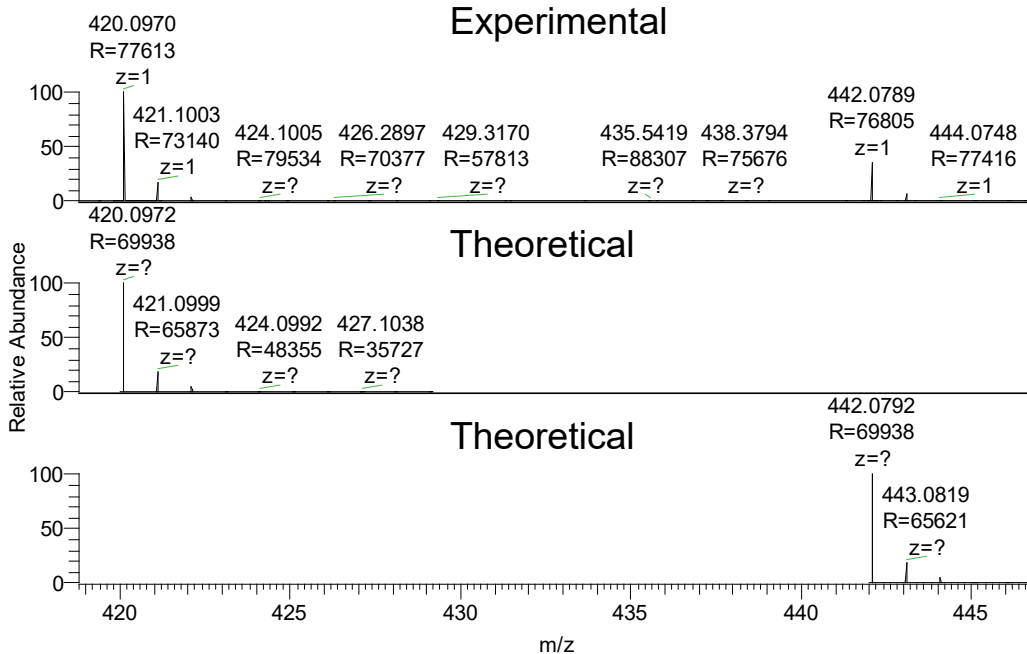

NL: 2.02E7  
7#1-29 RT: 0.02-0.40 AV: 29 T: FTMS +  
p ESI Full ms [100.00-2000.00]

NL: 1.79E4  $\Delta m = 0.48$  ppm

$C_{17}H_{17}N_5O_6S + H$ :  
 $C_{17}H_{18}N_5O_6S_1$   
p (gss, s /p:40) Chrg 1  
R: 70000 Res .Pwr . @FWHM

NL: 1.79E4  $\Delta m = 0.68$  ppm

$C_{17}H_{17}N_5O_6S + Na$ :  
 $C_{17}H_{17}N_5O_6S_1Na_1$   
p (gss, s /p:40) Chrg 1  
R: 70000 Res .Pwr . @FWHM



**7**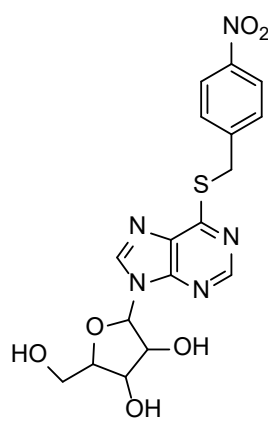 $\lambda = 254 \text{ nm}$ 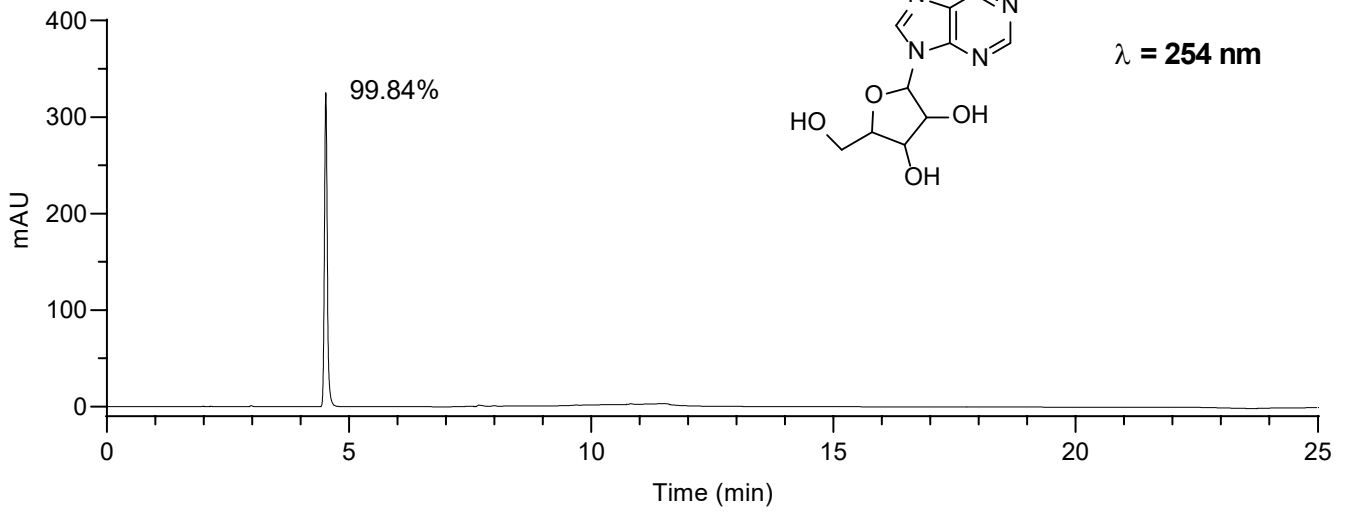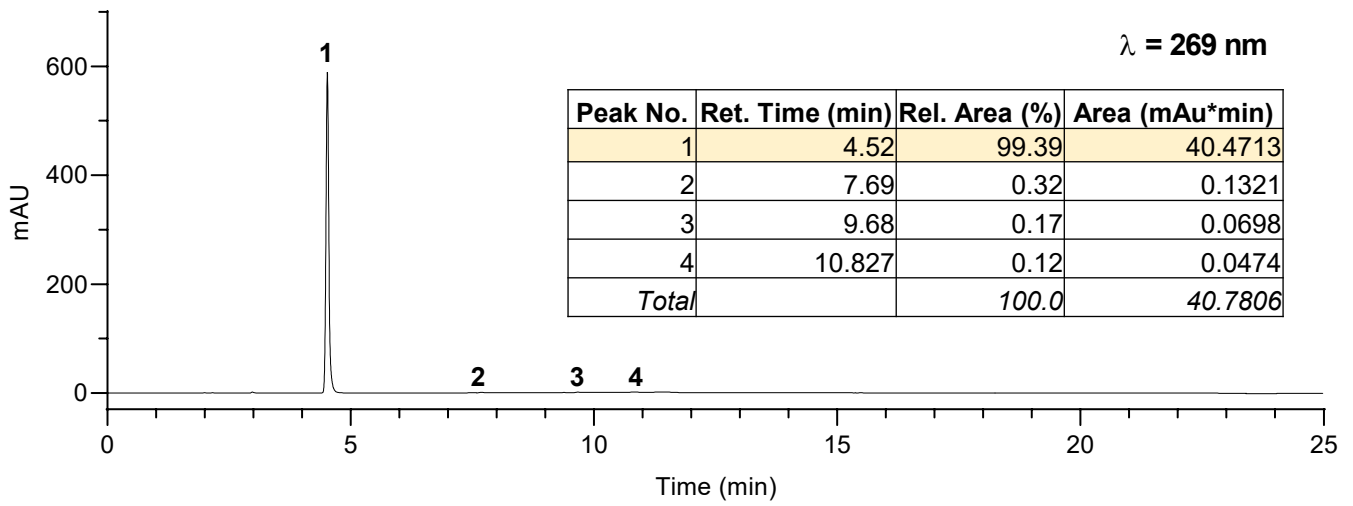 $\lambda = 269 \text{ nm}$ 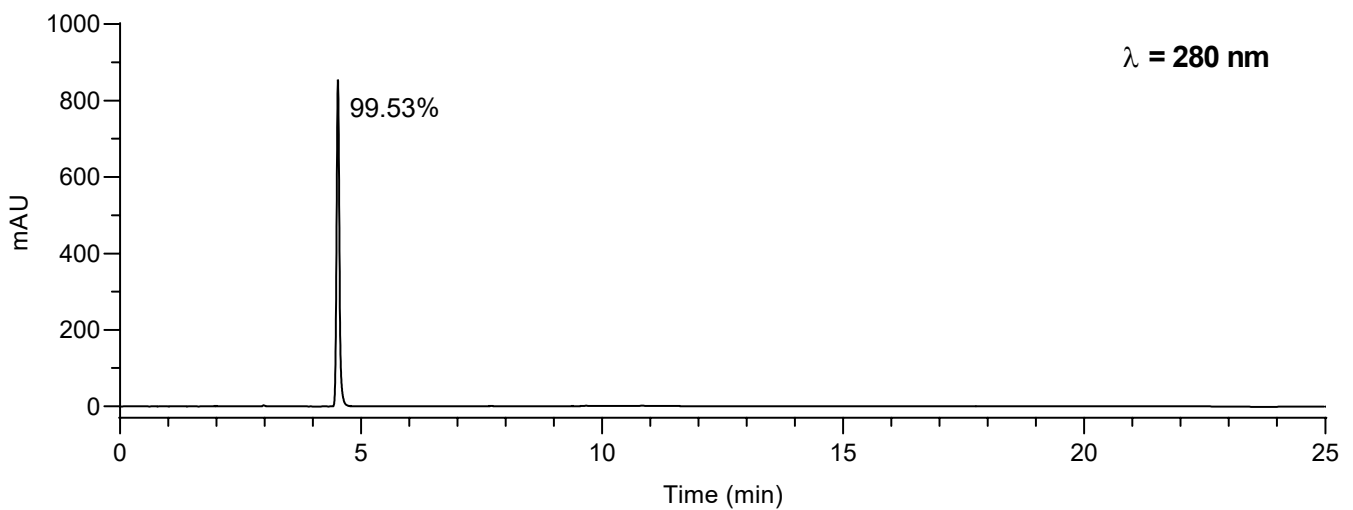 $\lambda = 280 \text{ nm}$

8

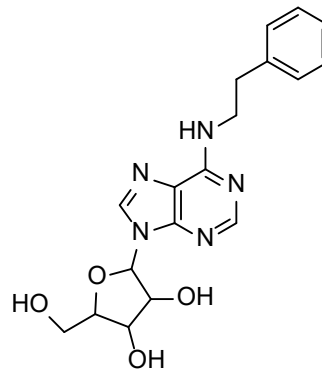

8 #2-30 RT: 0.03-0.41 AV: 29 NL: 1.30E8 T: FTMS  
+ p ESI Full ms [100.00-2000.00]

Full scan ESI(+)

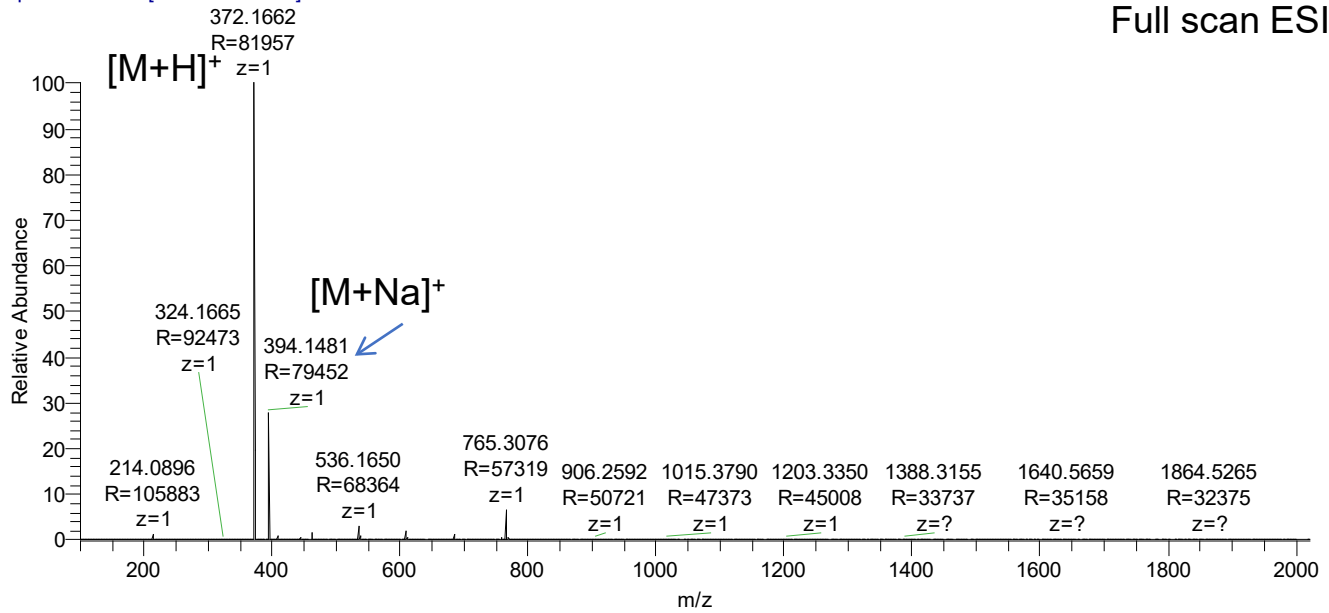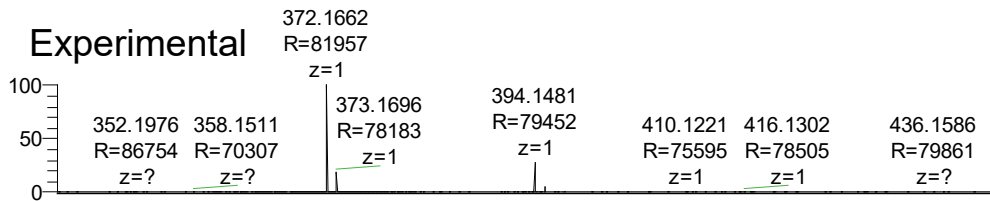

NL:  
1.30E8  
8#2-30 RT:  
0.03-0.41 AV: 29 T: FTMS +  
p ESI Full ms  
[100.00-2000.00]

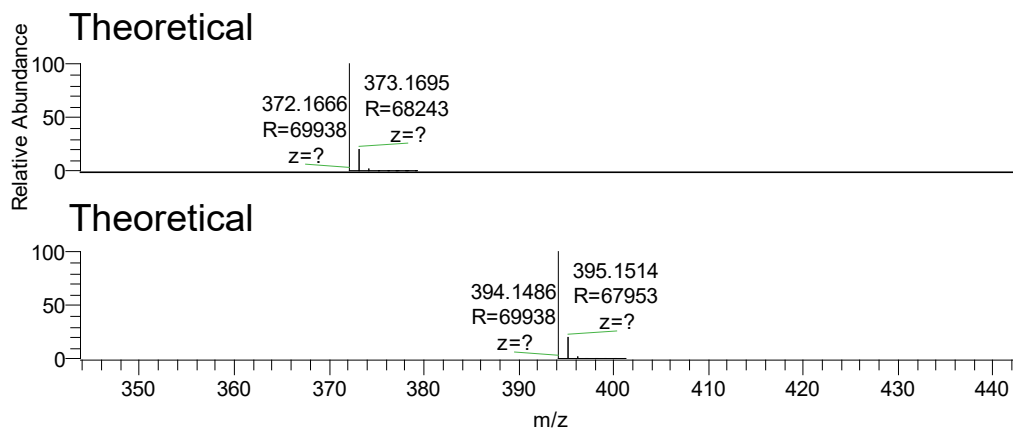

NL:  
1.87E4  $\Delta m = 0.85 \text{ ppm}$   
 $C_{18}H_{21}N_5O_4 + H$   
 $C_{18}H_{22}N_5O_4$   
p (gss, s /p:40) Chrg 1  
R: 70000 Res .Pwr. @FWHM

NL:  
1.88E4  $\Delta m = 1.27 \text{ ppm}$   
 $C_{18}H_{21}N_5O_4 + Na$   
 $C_{18}H_{21}N_5O_4 Na_1$   
p (gss, s /p:40) Chrg 1  
R: 70000 Res .Pwr. @FWHM

**8**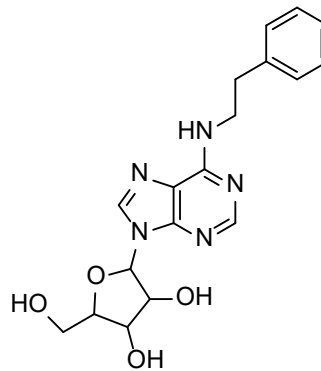 $\lambda = 254 \text{ nm}$ 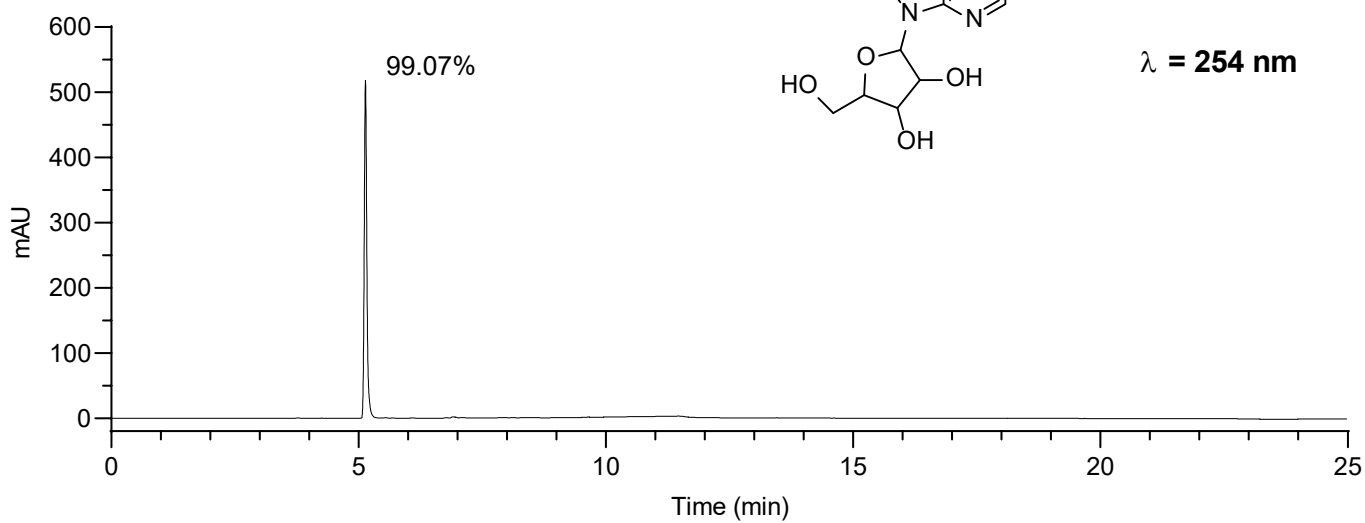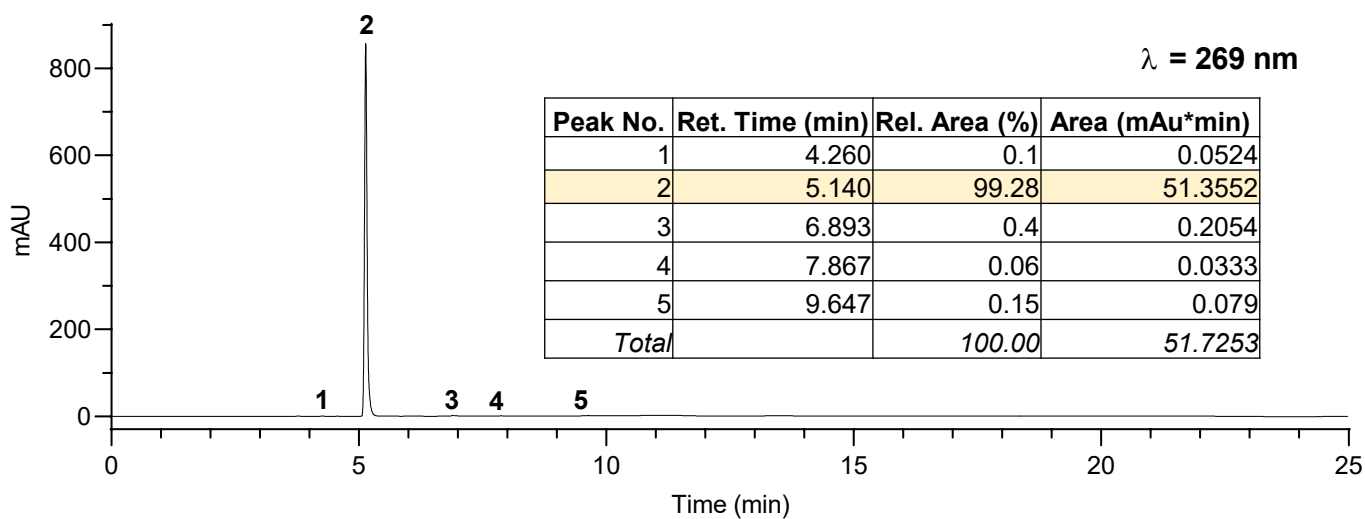 $\lambda = 280 \text{ nm}$ 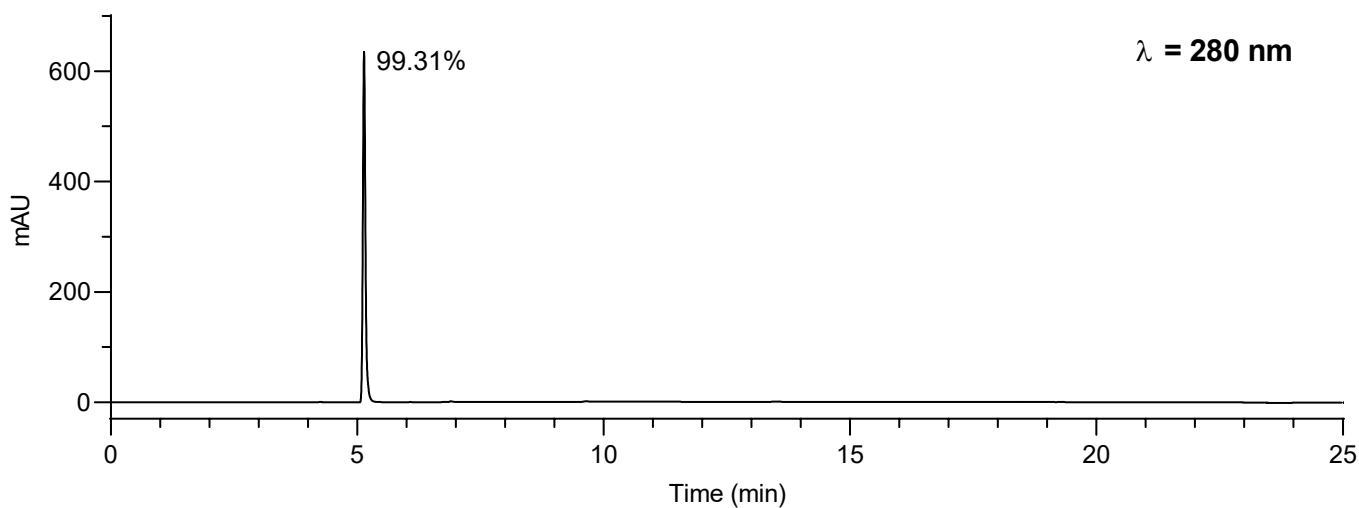

# 9 - APNEA

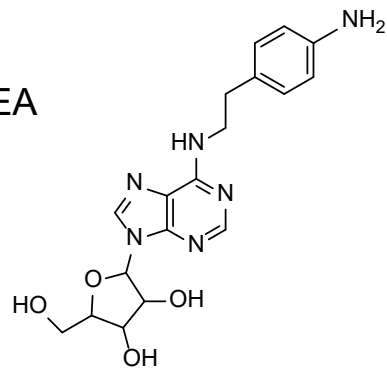

9\_APNEA #1-30 RT: 0.02-0.41 AV: 30 NL: 5.42E7 T: FTMS +  
p ESI Full ms [100.00-2000.00]

Full scan ESI(+)

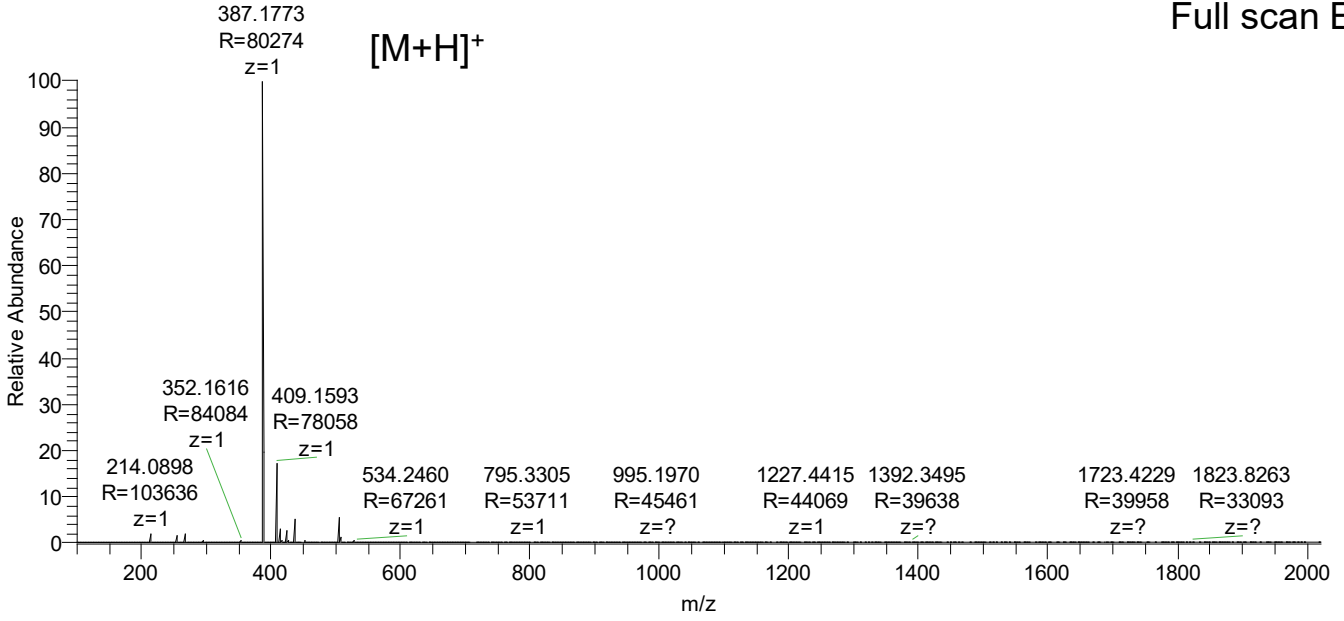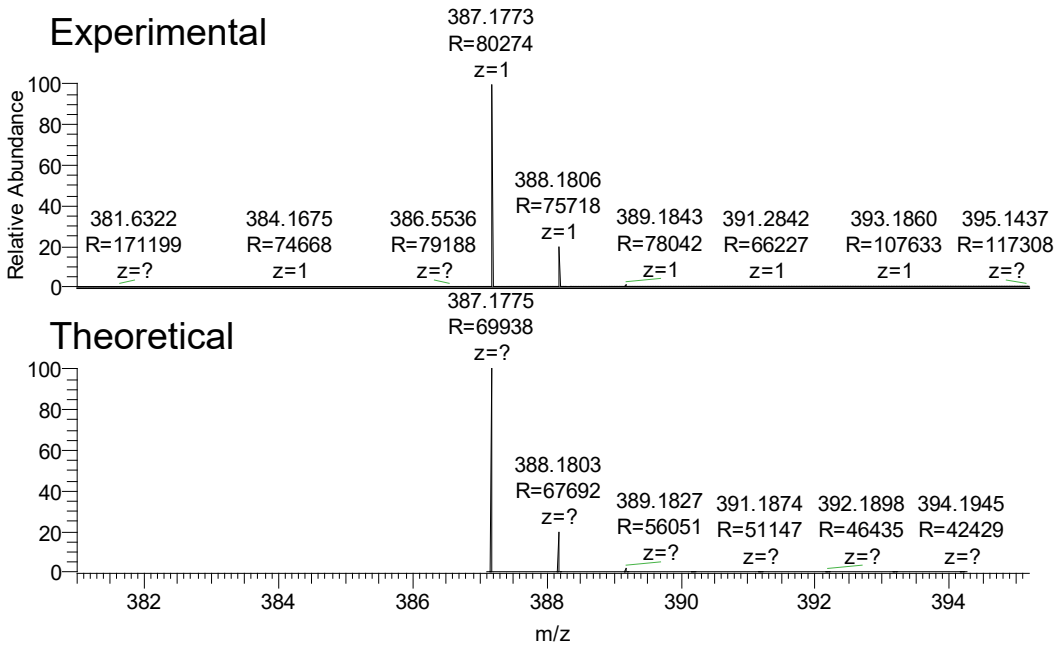

NL:  
5.42E7  
9\_APNEA#1-30 RT:  
0.02-0.41 AV: 30 T: FTMS +  
p ESI Full ms  
[100.00-2000.00]

NL:  
1.87E4  
C<sub>8</sub>H<sub>22</sub>N<sub>6</sub>O<sub>4</sub> +H:  
C<sub>8</sub>H<sub>23</sub>N<sub>6</sub>O<sub>4</sub>  
p (gss, s /p:40) Chrg 1  
R: 70000 Res .Pwr. @FWHM

$\Delta m = 0.52$  ppm

# 9 - APNEA

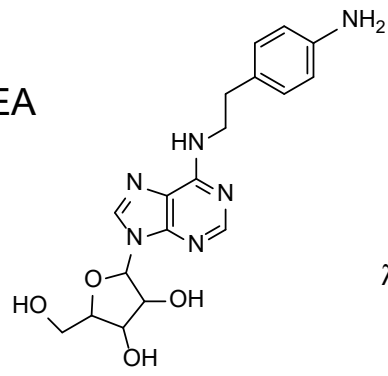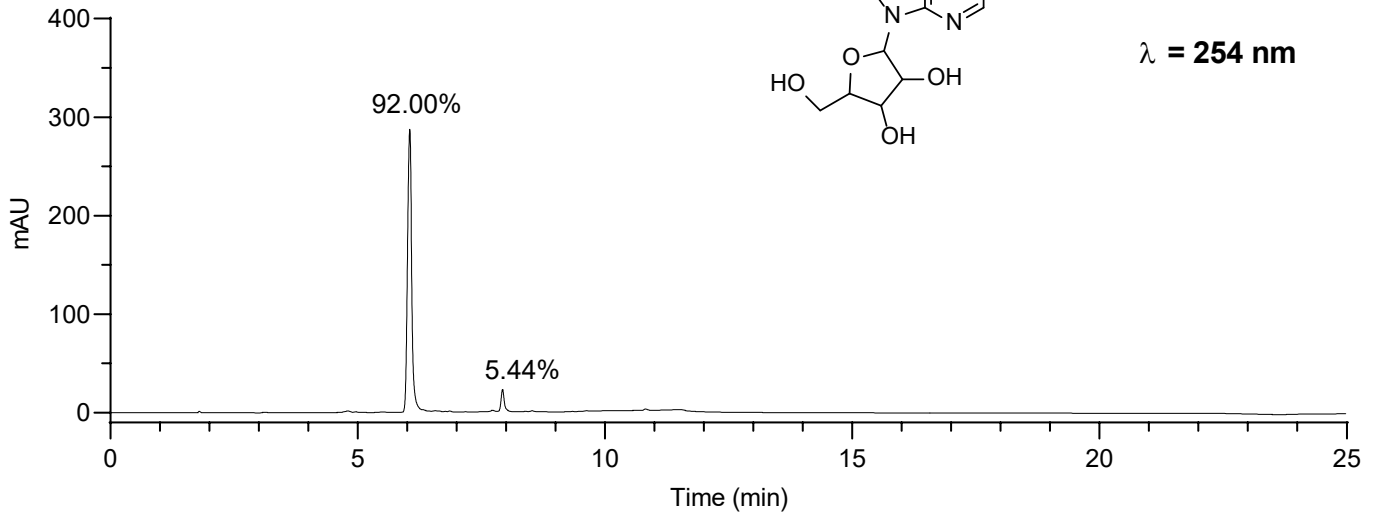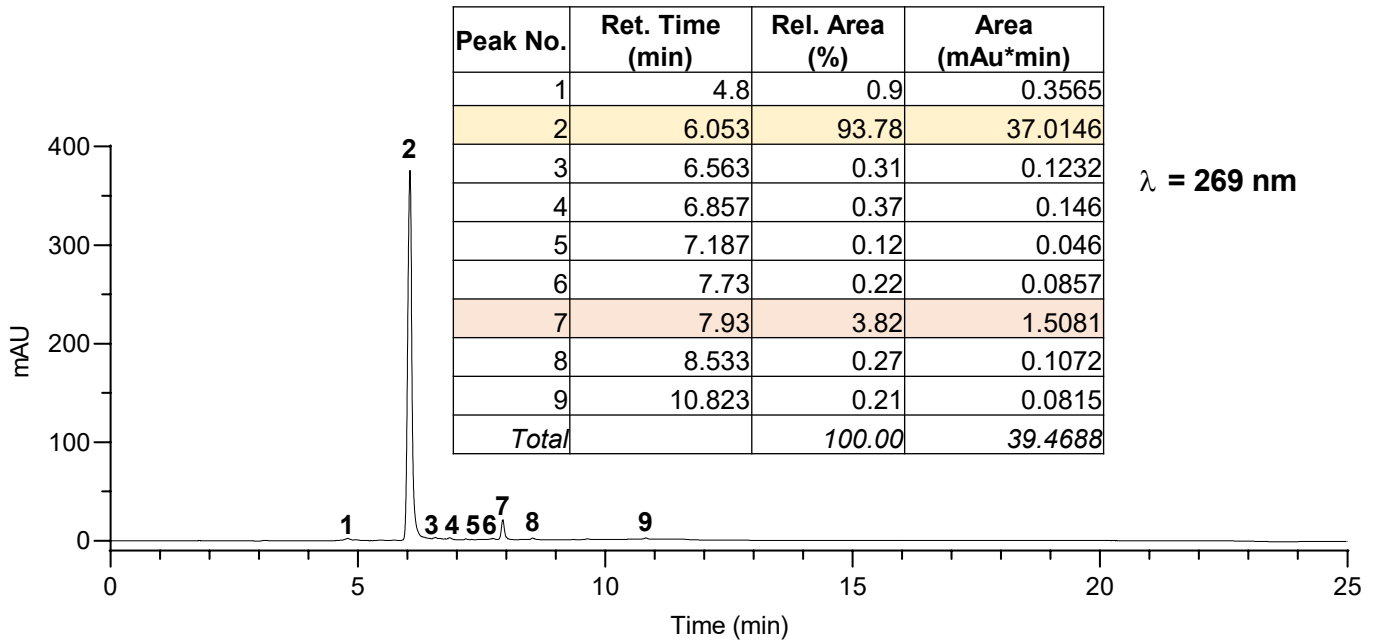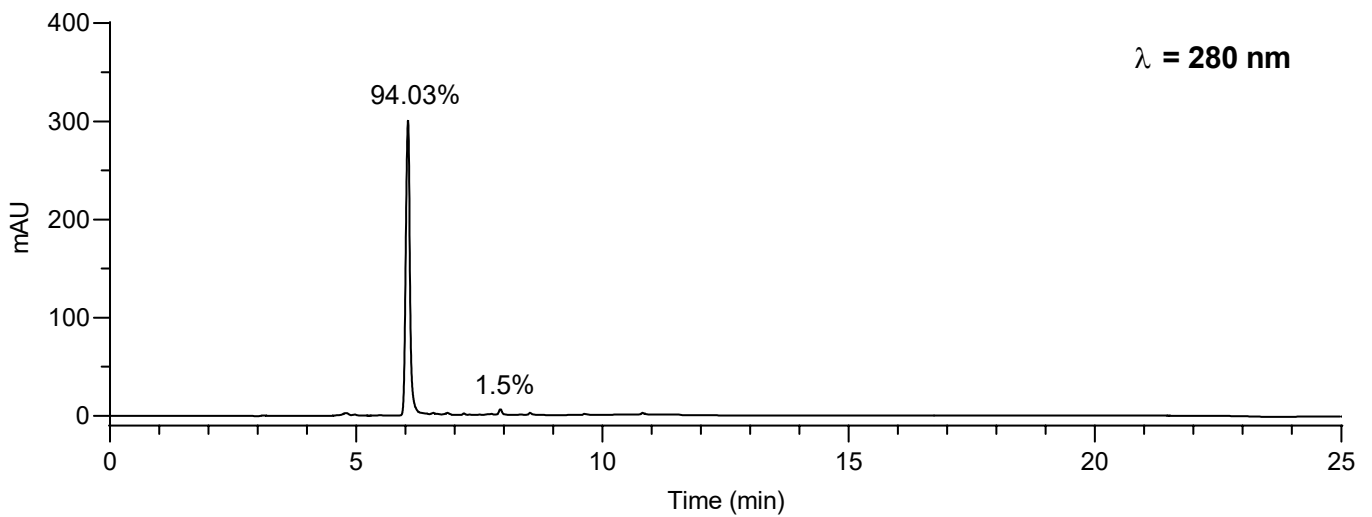

10

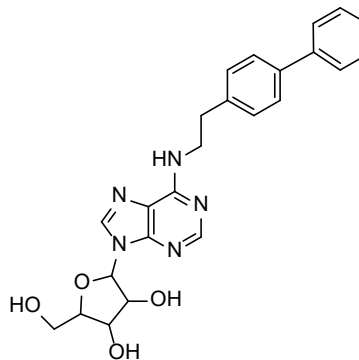

10#1-30 RT: 0.02-0.43 AV: 30 NL: 6.41E6 T: FTMS + p  
ESI Full ms [100.00-2000.00]

Full scan ESI(+)

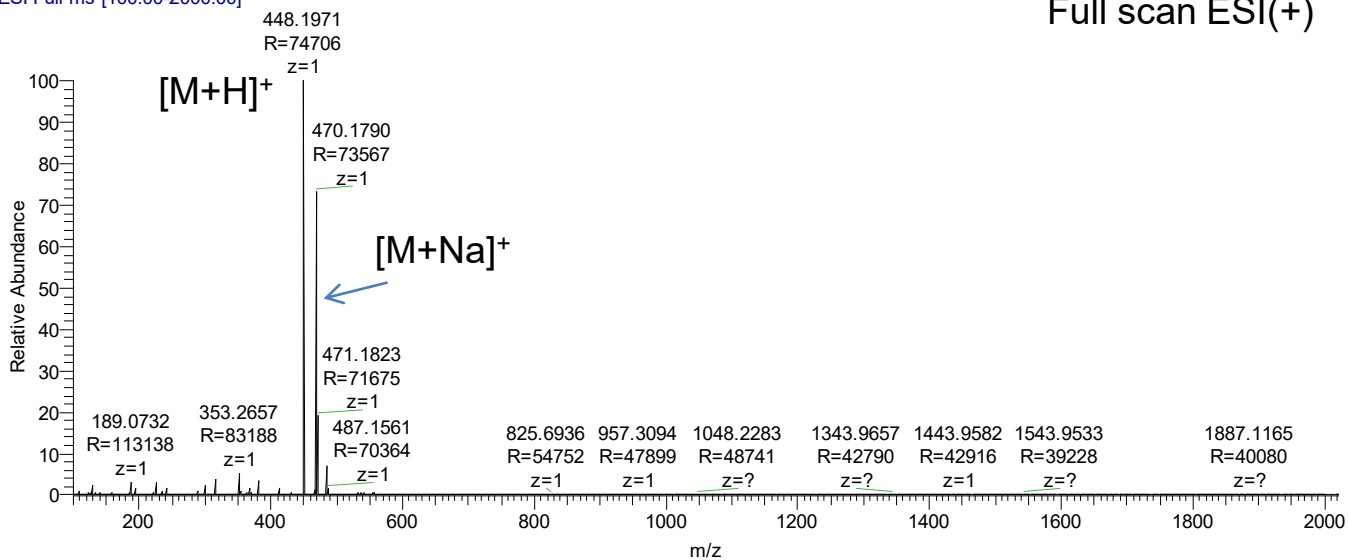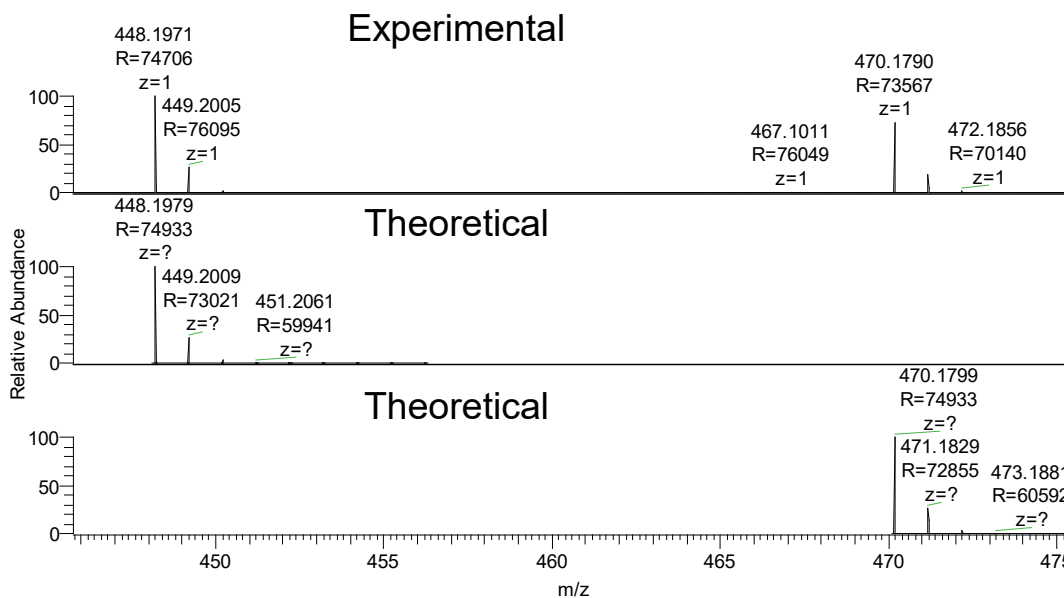

NL:  
6.41E6  
10#1-30 RT: 0.02-0.43 AV:  
30 T: FTMS + p ESI Full ms  
[100.00-2000.00]

NL: 1.76E4  $\Delta m = 1.78$  ppm

C<sub>24</sub>H<sub>25</sub>N<sub>5</sub>O<sub>4</sub> + H:  
C<sub>24</sub>H<sub>26</sub>N<sub>5</sub>O<sub>4</sub>  
p (gss, s /p:40) Chrg 1  
R: 75000 Res .Pwr. @FWHM

NL: 1.76E4  $\Delta m = 1.91$  ppm

C<sub>24</sub>H<sub>25</sub>N<sub>5</sub>O<sub>4</sub> + Na:  
C<sub>24</sub>H<sub>25</sub>N<sub>5</sub>O<sub>4</sub>Na<sub>1</sub>  
p (gss, s /p:40) Chrg 1  
R: 75000 Res .Pwr. @FWHM

**10**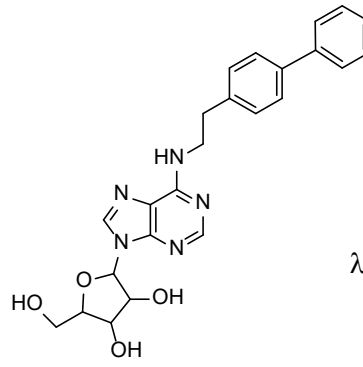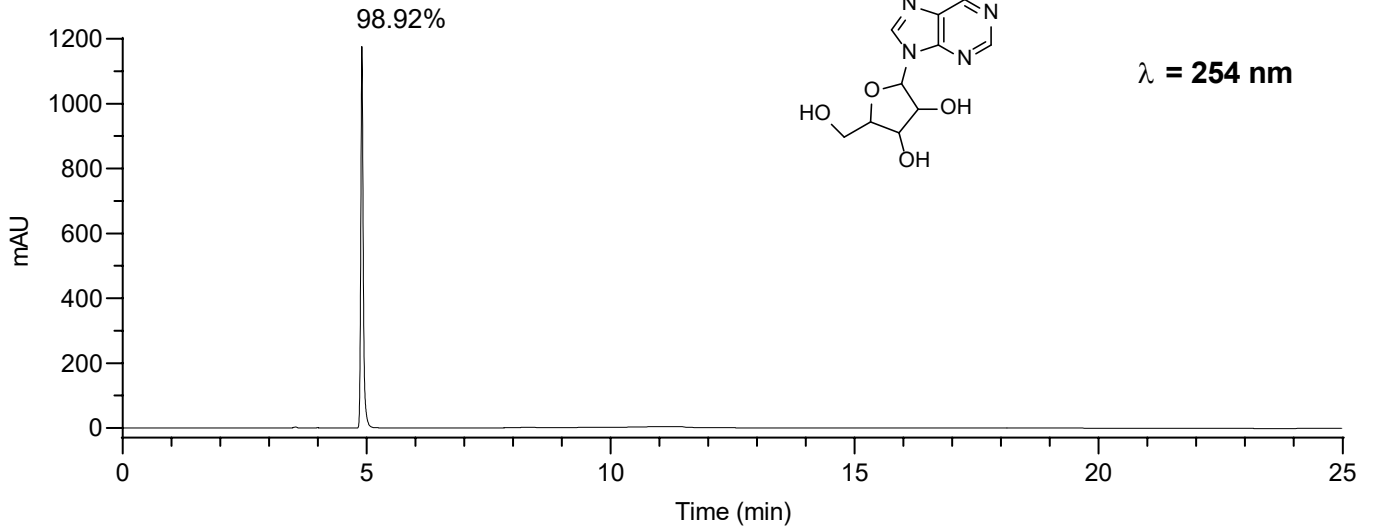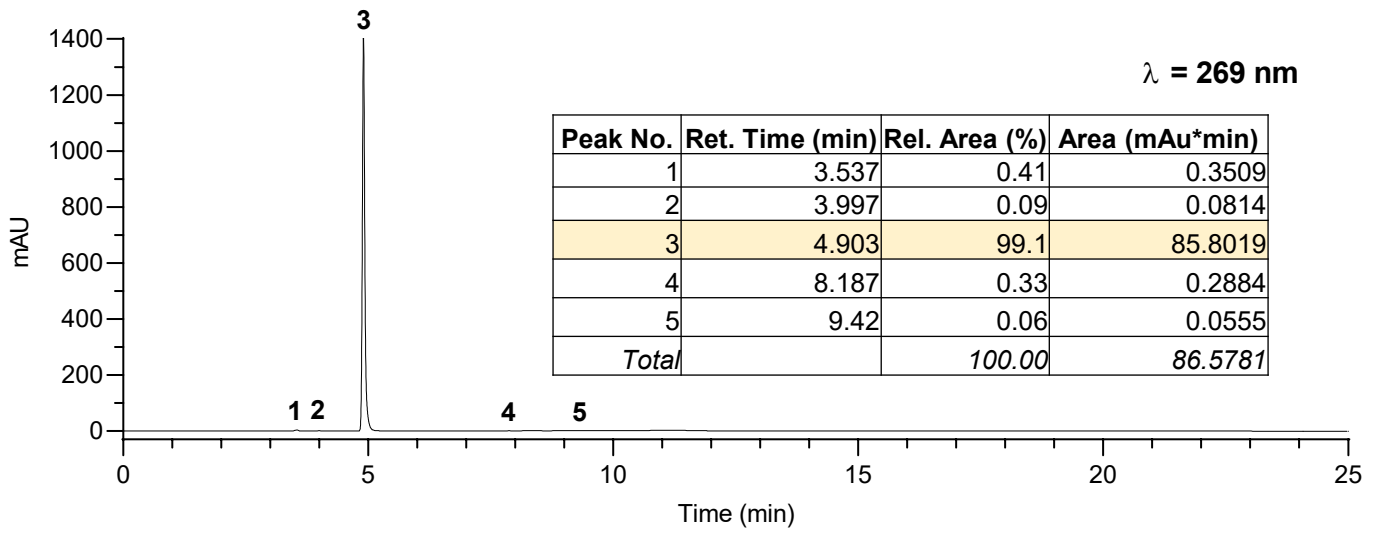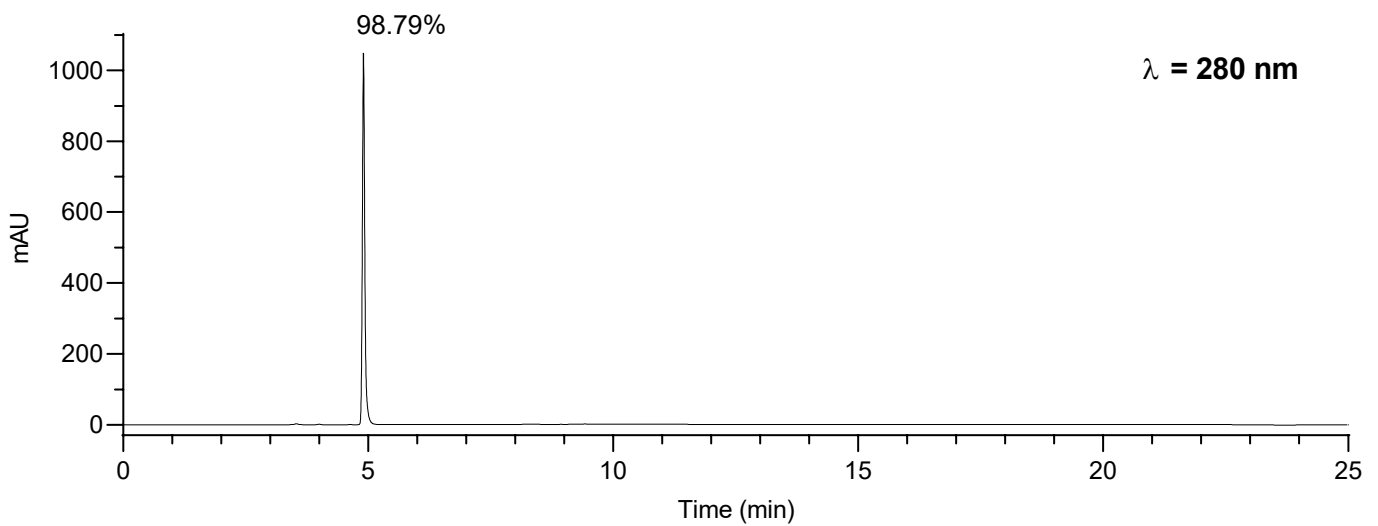

11

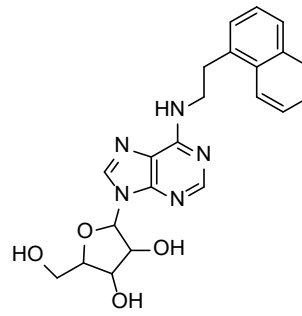

11 #1-30 RT: 0.02-0.41 AV: 30 NL: 4.07E7 T: FTMS  
+ p ESI Full ms [100.00-2000.00]

Full scan ESI(+)

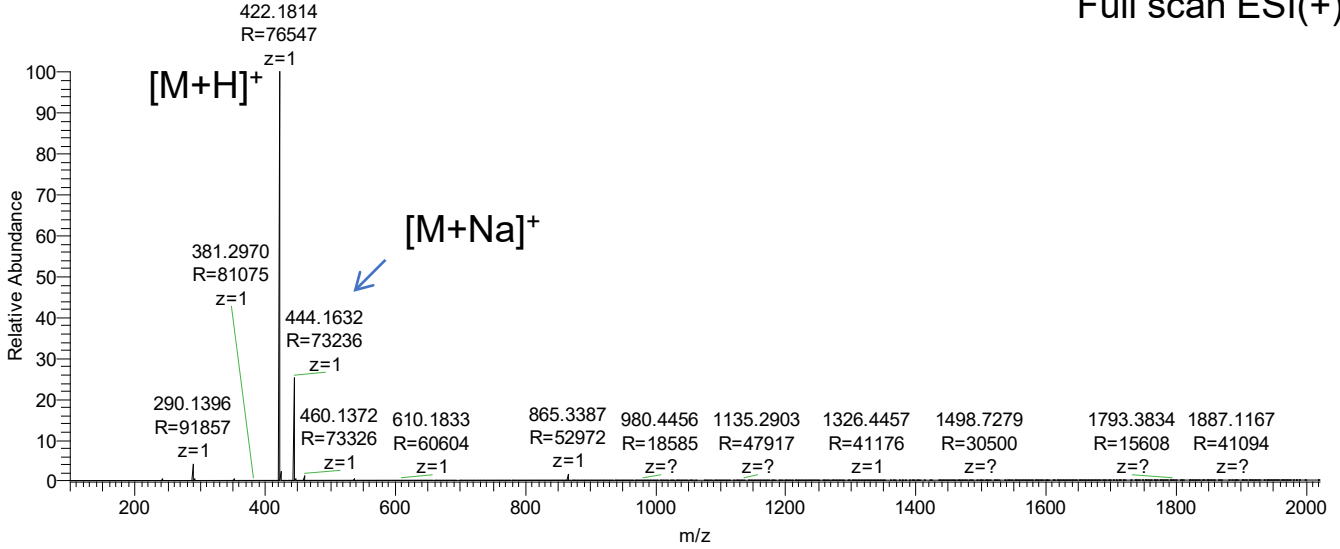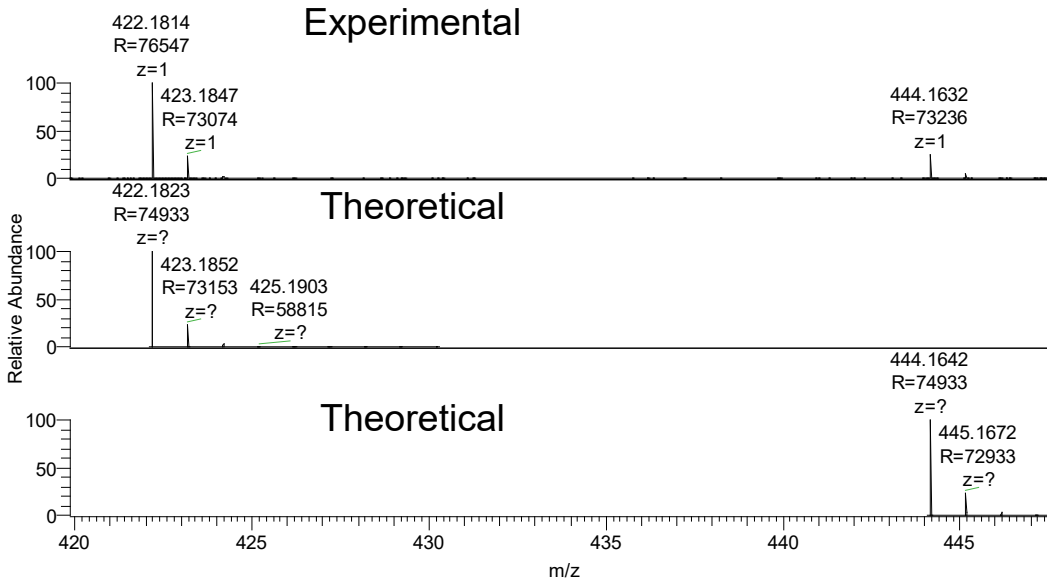

NL:  
4.07E7  
11#1-30 RT: 0.02-0.41 AV:  
30 T: FTMS + p ESI Full ms  
[100.00-2000.00]

NL: 1.80E4  $\Delta m = 2.13 \text{ ppm}$

C<sub>22</sub>H<sub>23</sub>N<sub>5</sub>O<sub>4</sub> + H:  
C<sub>22</sub>H<sub>24</sub>N<sub>5</sub>O<sub>4</sub>  
p (gss, s /p:40) Chrg 1  
R: 75000 Res .Pwr . @FWHM

NL: 1.80E4  $\Delta m = 2.25 \text{ ppm}$

C<sub>22</sub>H<sub>23</sub>N<sub>5</sub>O<sub>4</sub> + Na:  
C<sub>22</sub>H<sub>23</sub>N<sub>5</sub>O<sub>4</sub>Na  
p (gss, s /p:40) Chrg 1  
R: 75000 Res .Pwr . @FWHM



**11**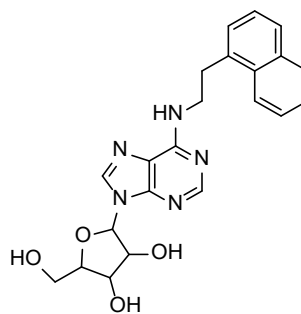 $\lambda = 254 \text{ nm}$ 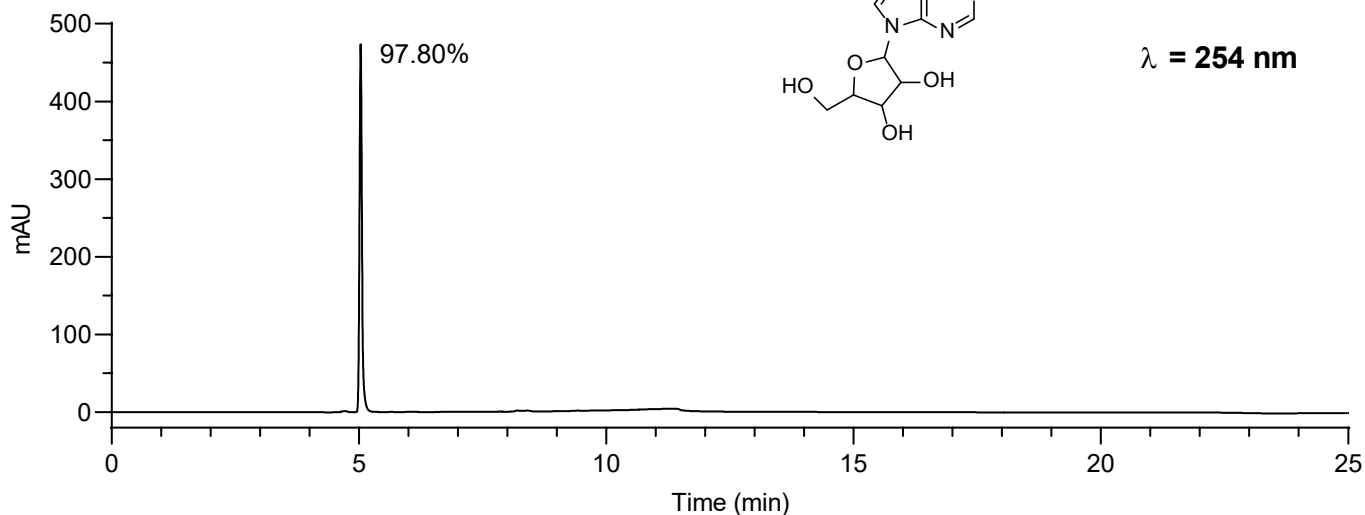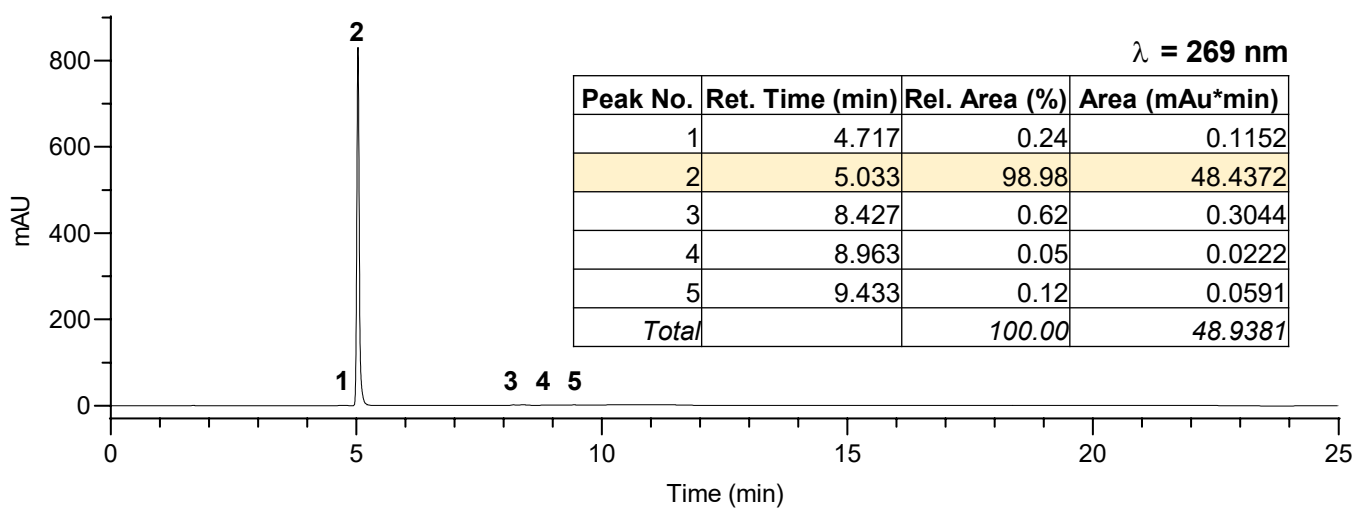 $\lambda = 280 \text{ nm}$ 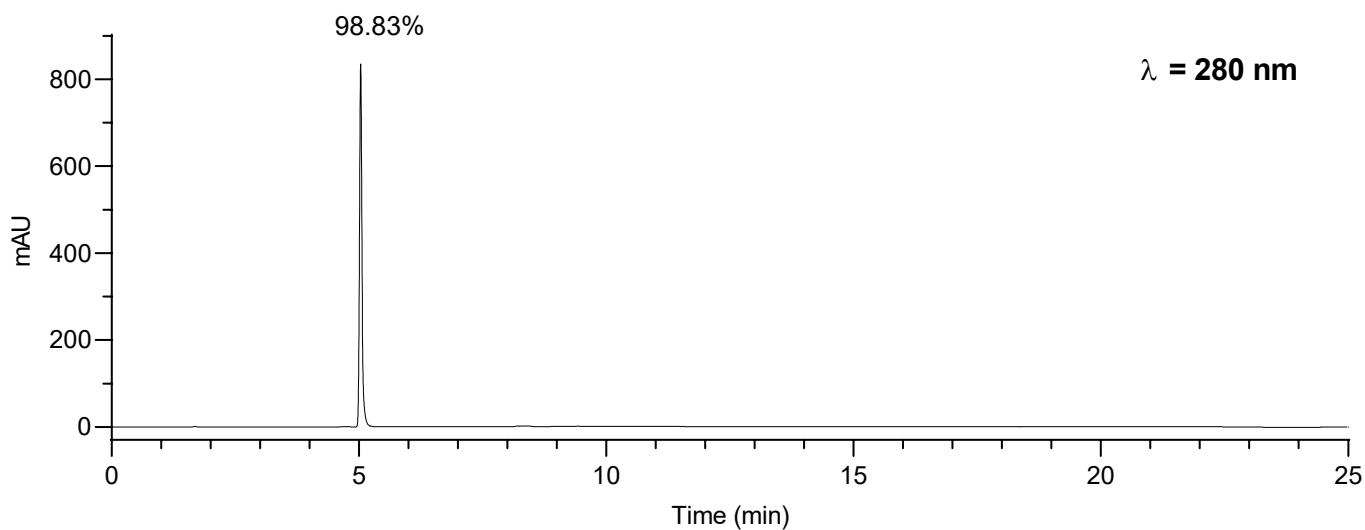

12

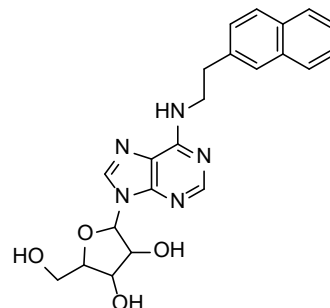

12 #1-30 RT: 0.02-0.41 AV: 30 NL: 4.08E7 T: FTMS  
+ p ESI Full ms [100.00-2000.00]

Full scan ESI(+)

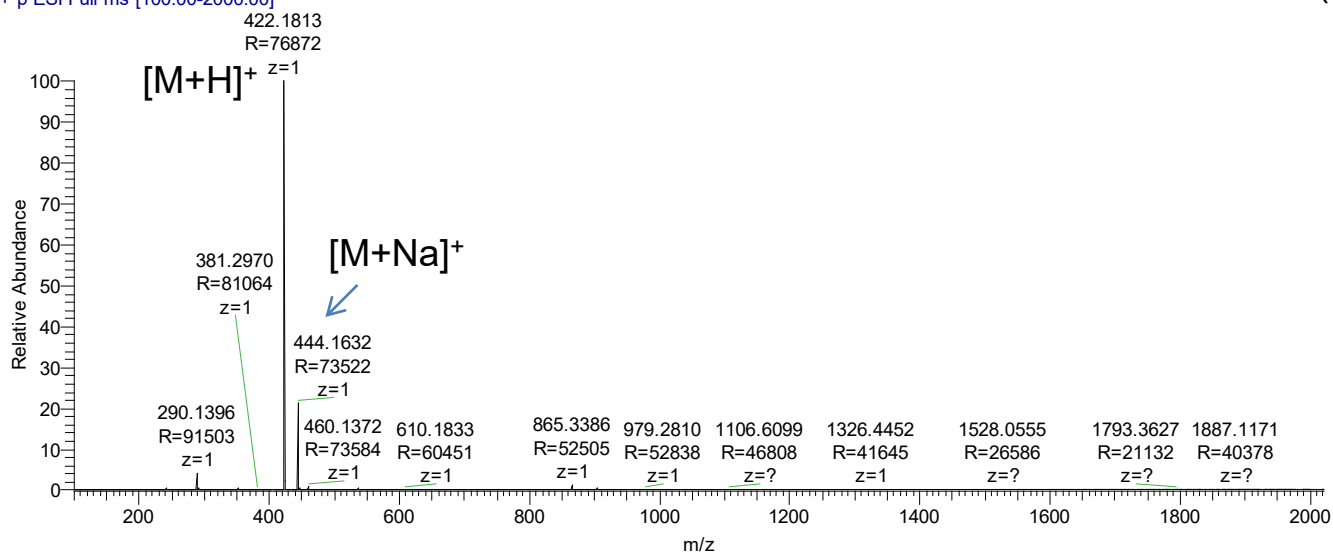

Experimental

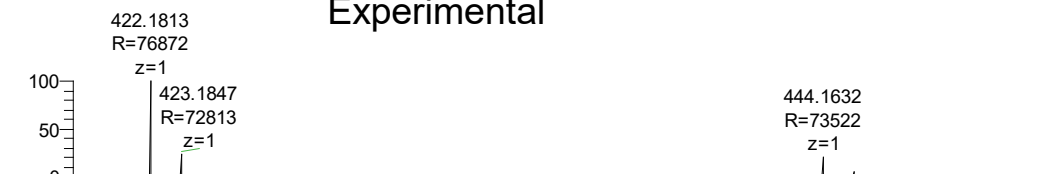

NL:  
4.08E7  
12#1-30 RT: 0.02-0.41 AV:  
30 T: FTMS + p ESI Full ms  
[100.00-2000.00]

Theoretical

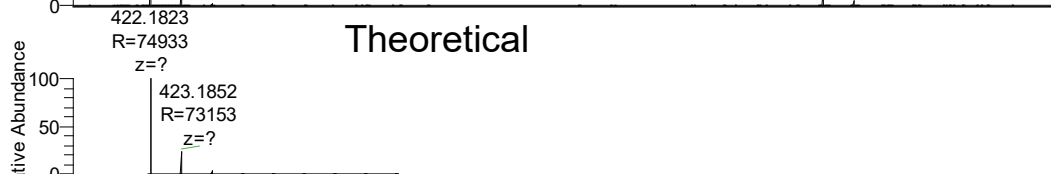

NL:  
1.80E4  $\Delta m = 2.36\text{ppm}$   
C<sub>22</sub>H<sub>23</sub>N<sub>5</sub>O<sub>4</sub> +H:  
C<sub>22</sub>H<sub>24</sub>N<sub>5</sub>O<sub>4</sub>  
p (gss, s /p:40) Chrg 1  
R: 75000 Res .Pwr . @FWHM

Theoretical

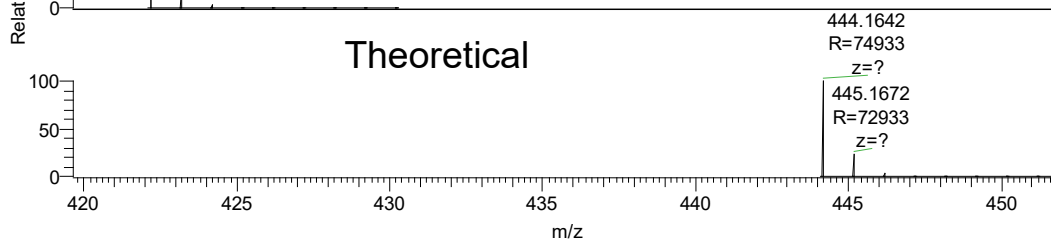

NL:  
1.80E4  $\Delta m = 2.25\text{ppm}$   
C<sub>22</sub>H<sub>23</sub>N<sub>5</sub>O<sub>4</sub> +Na:  
C<sub>22</sub>H<sub>23</sub>N<sub>5</sub>O<sub>4</sub>Na<sub>1</sub>  
p (gss, s /p:40) Chrg 1  
R: 75000 Res .Pwr . @FWHM

**12**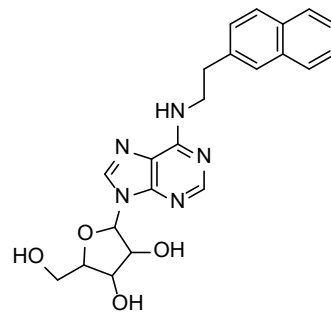 $\lambda = 254 \text{ nm}$ 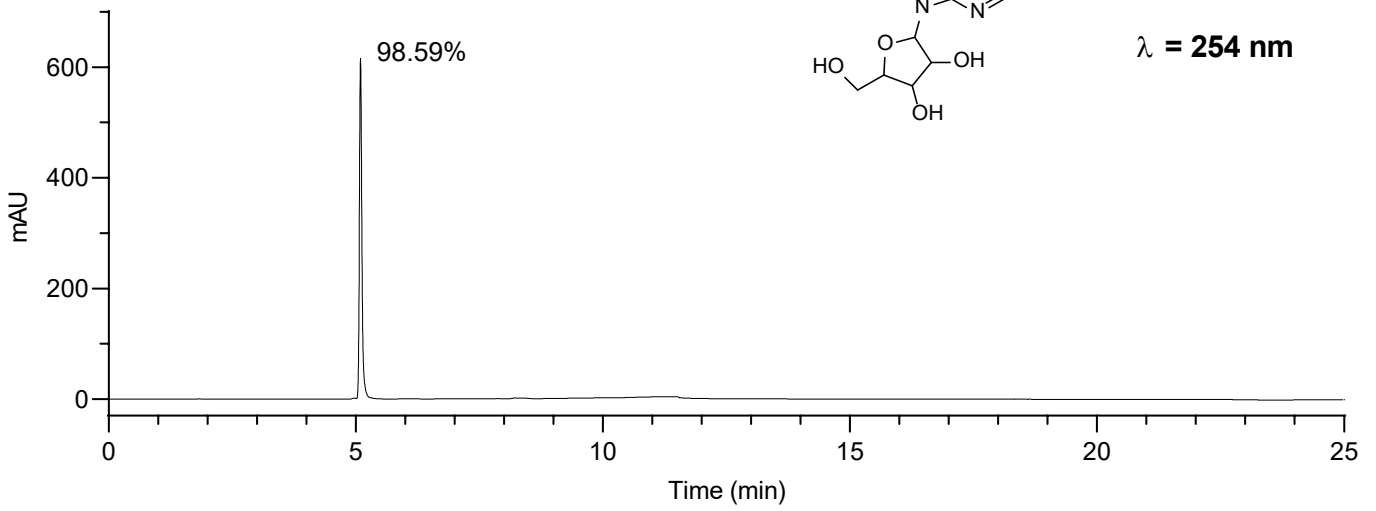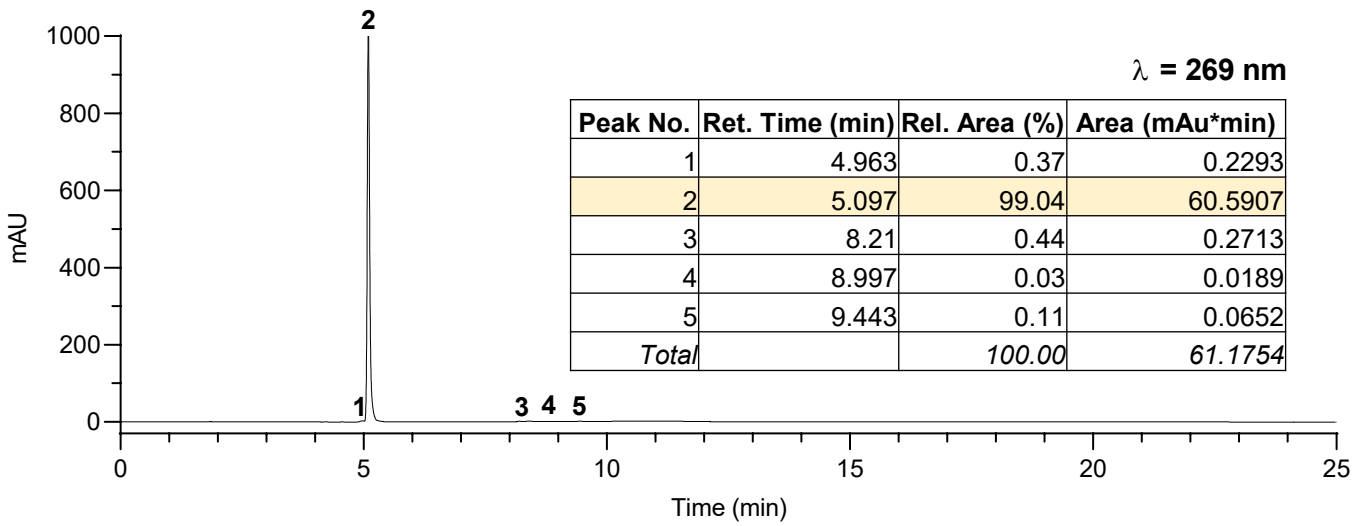 $\lambda = 269 \text{ nm}$ 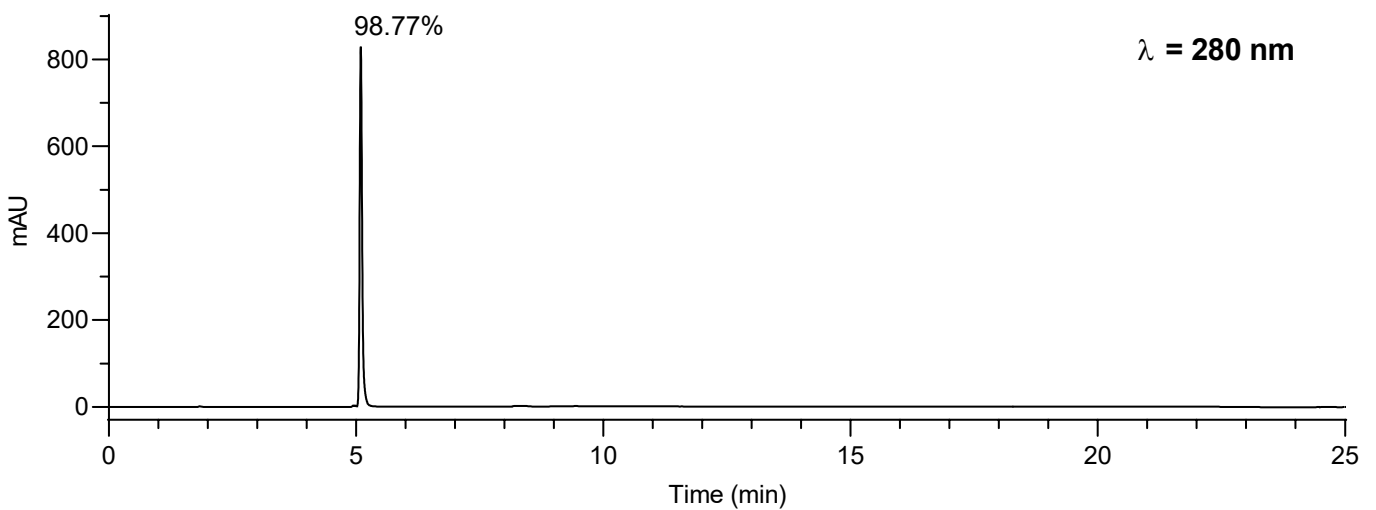 $\lambda = 280 \text{ nm}$

13

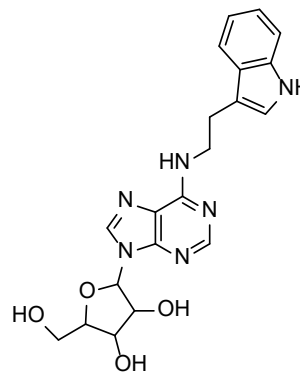

13 #2-30 RT: 0.03-0.42 AV: 29 NL: 1.11E7 T: FTMS  
+ p ESI Full ms [100.00-2000.00]

Full scan ESI(+)

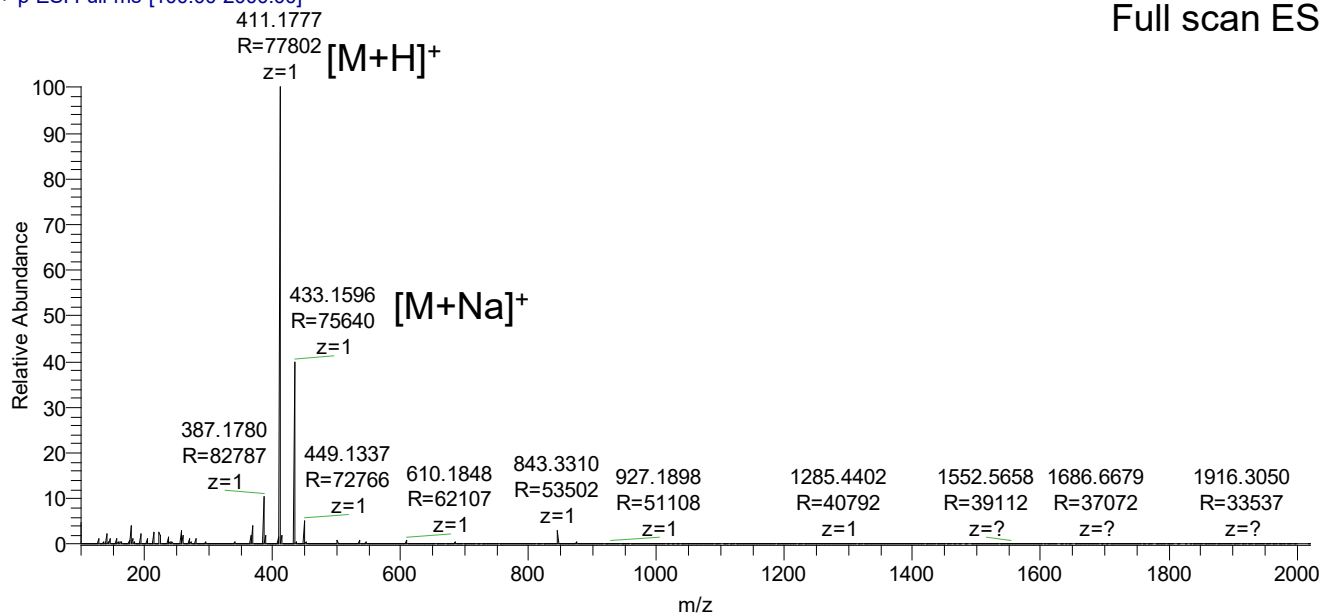

## Experimental

NL: 1.11E7  
13#2-30 RT: 0.03-0.42 AV: 29 T: FTMS + p ESI Full ms [100.00-2000.00]

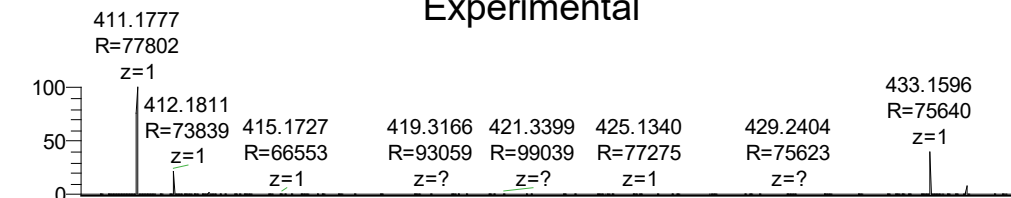

NL: 1.83E4  $\Delta m = 0.49 \text{ ppm}$

C<sub>20</sub>H<sub>22</sub>N<sub>6</sub>O<sub>4</sub> + H:  
C<sub>20</sub>H<sub>23</sub>N<sub>6</sub>O<sub>4</sub>  
p (gss, s /p:40) Chrg 1  
R: 70000 Res .Pwr . @FWHM

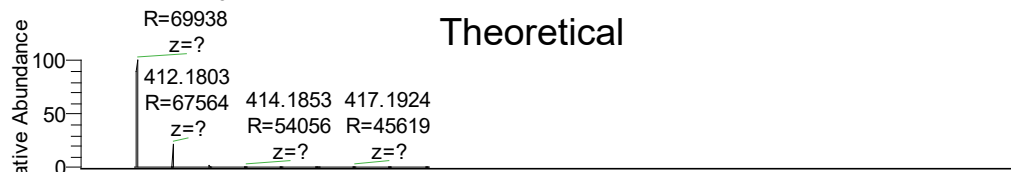

NL: 1.83E4  $\Delta m = 0.23 \text{ ppm}$

C<sub>20</sub>H<sub>22</sub>N<sub>6</sub>O<sub>4</sub> + Na:  
C<sub>20</sub>H<sub>22</sub>N<sub>6</sub>O<sub>4</sub>Na<sub>1</sub>  
p (gss, s /p:40) Chrg 1  
R: 70000 Res .Pwr . @FWHM

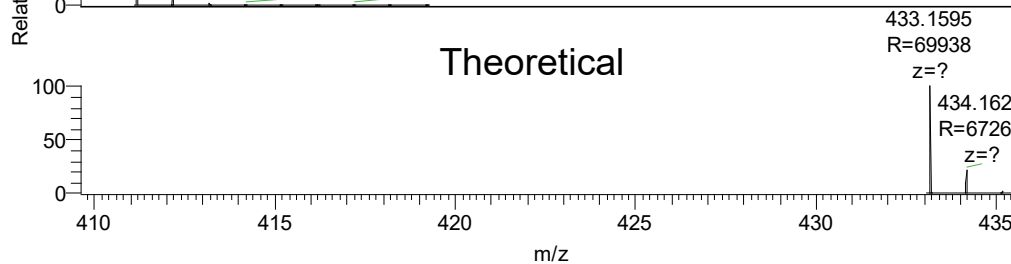

13

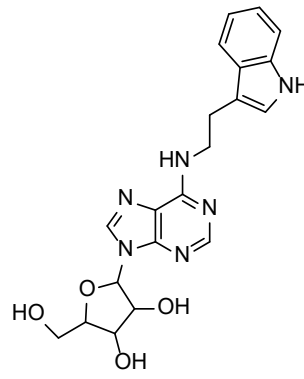

$\lambda = 254 \text{ nm}$

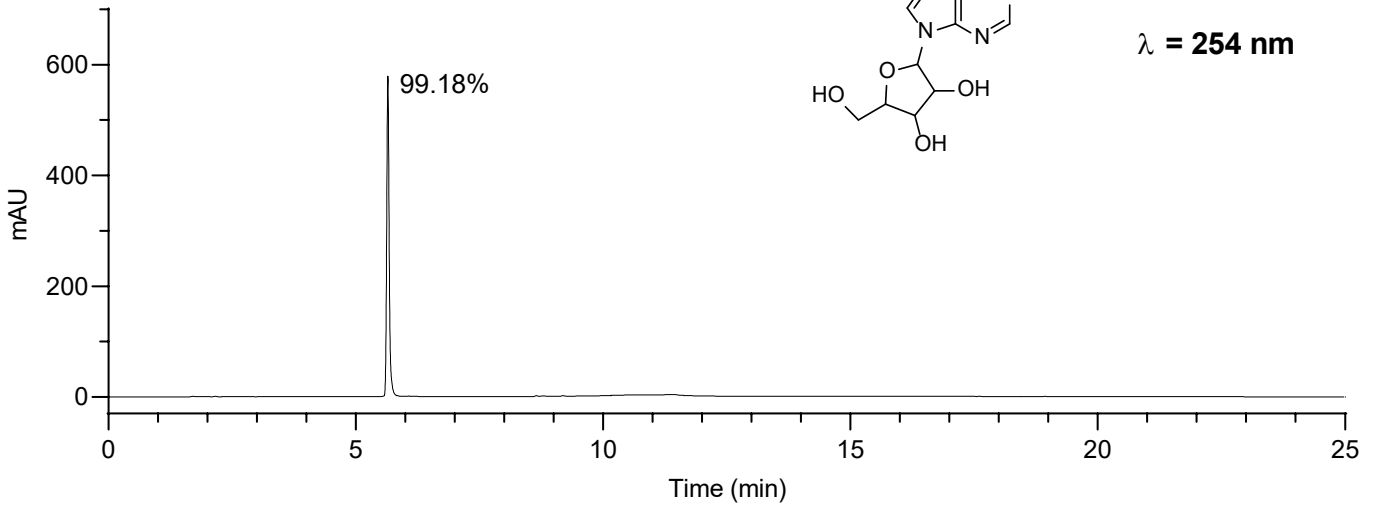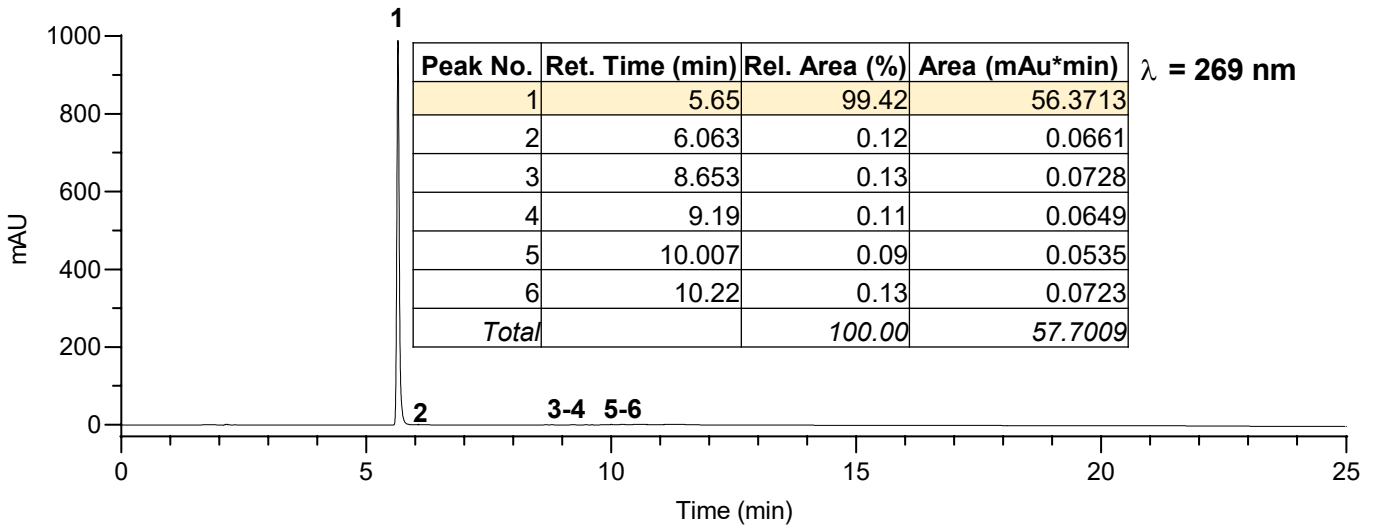

$\lambda = 269 \text{ nm}$

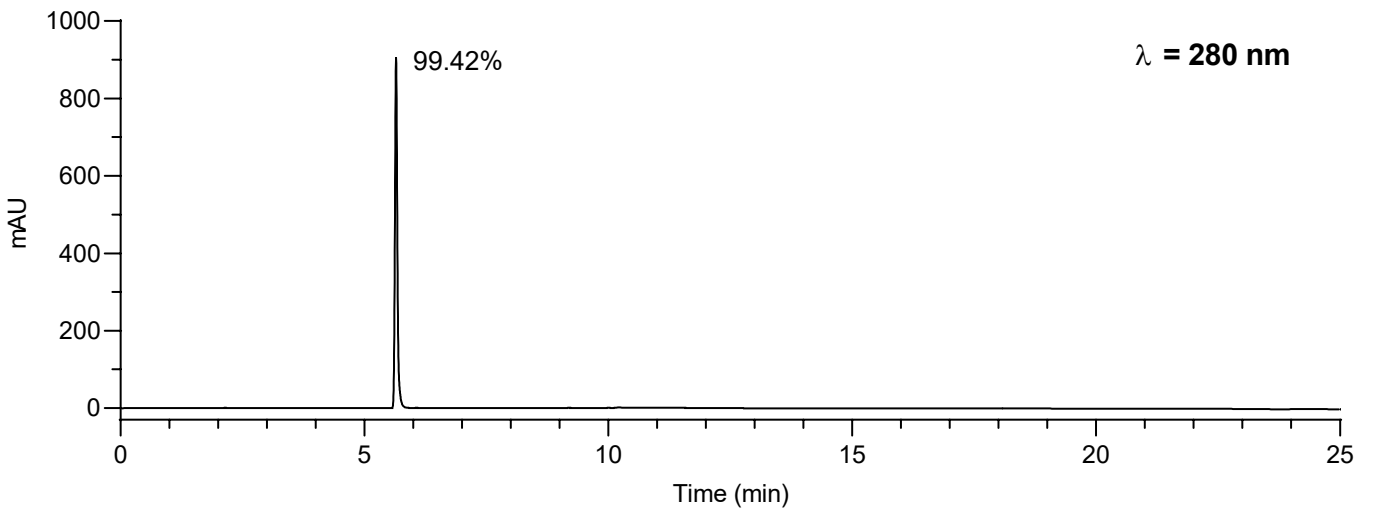

$\lambda = 280 \text{ nm}$

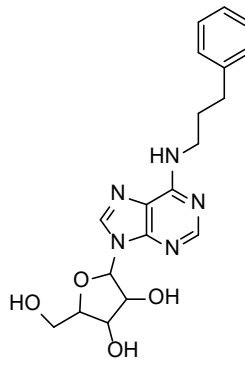

14 #1-30 RT: 0.02-0.44 AV: 30 NL: 3.31E6 T: FTMS  
+ p ESI Full ms [100.00-2000.00]

Full scan ESI(+)

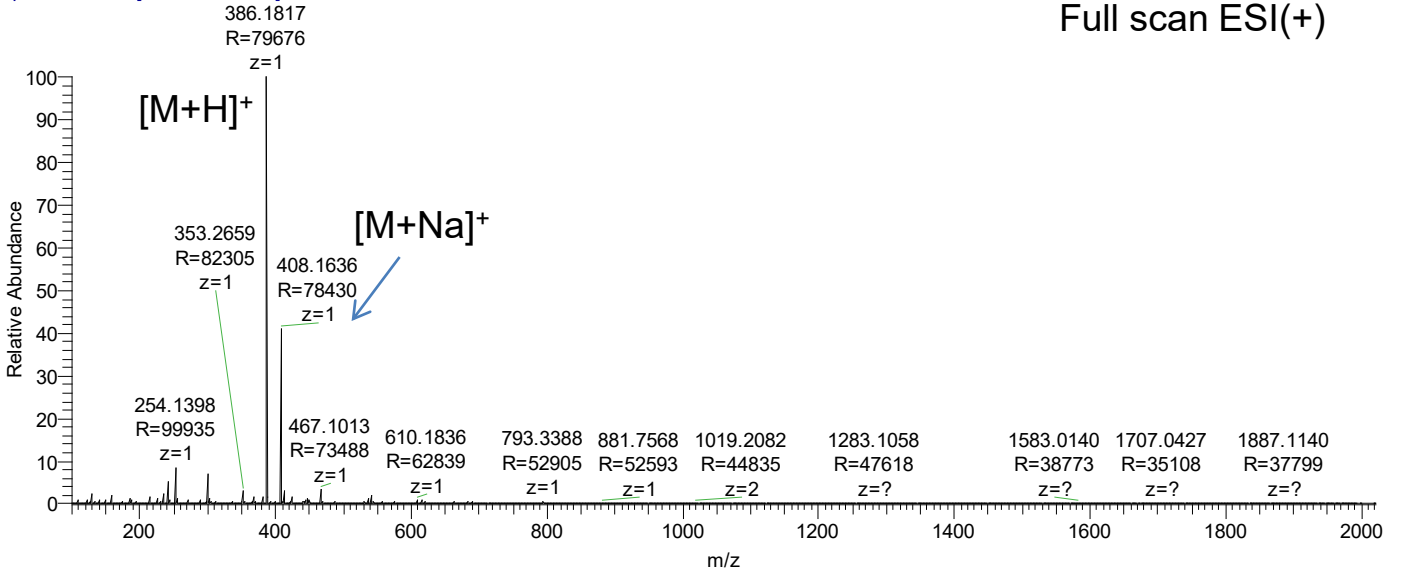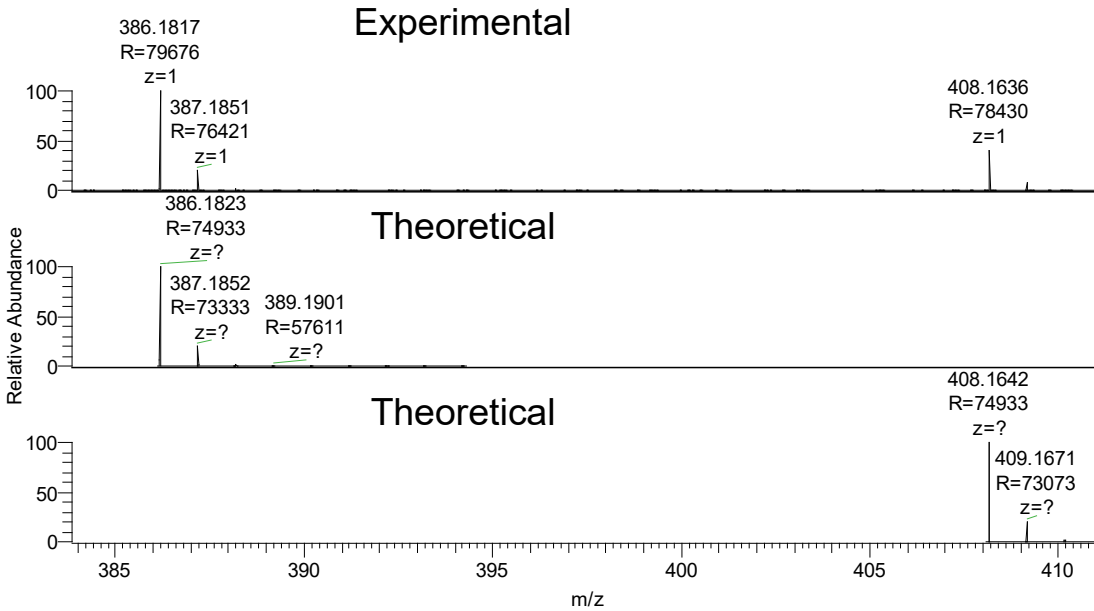

NL: 3.31E6  
14#1-30 RT: 0.02-0.44 AV: 30 T: FTMS + p ESI Full ms [100.00-2000.00]

NL: 1.85E4  $\Delta m = 1.55\text{ppm}$

C<sub>23</sub>H<sub>23</sub>N<sub>5</sub>O<sub>4</sub> + H:  
C<sub>23</sub>H<sub>24</sub>N<sub>5</sub>O<sub>4</sub>  
p (gss, s /p:40) Chrg 1  
R: 75000 Res .Pwr . @FWHM

NL: 1.85E4  $\Delta m = 1.47\text{ppm}$

C<sub>23</sub>H<sub>23</sub>N<sub>5</sub>O<sub>4</sub> + Na:  
C<sub>23</sub>H<sub>23</sub>N<sub>5</sub>O<sub>4</sub>Na<sub>1</sub>  
p (gss, s /p:40) Chrg 1  
R: 75000 Res .Pwr . @FWHM

**14**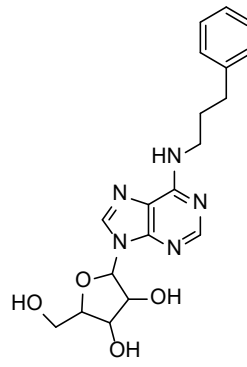 $\lambda = 254 \text{ nm}$ 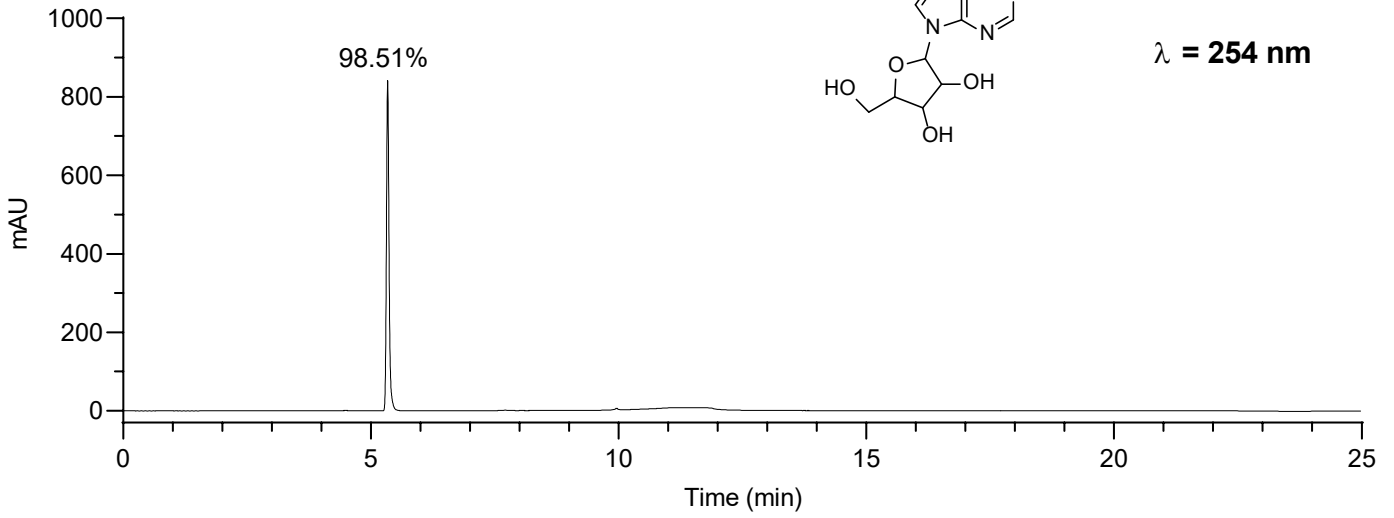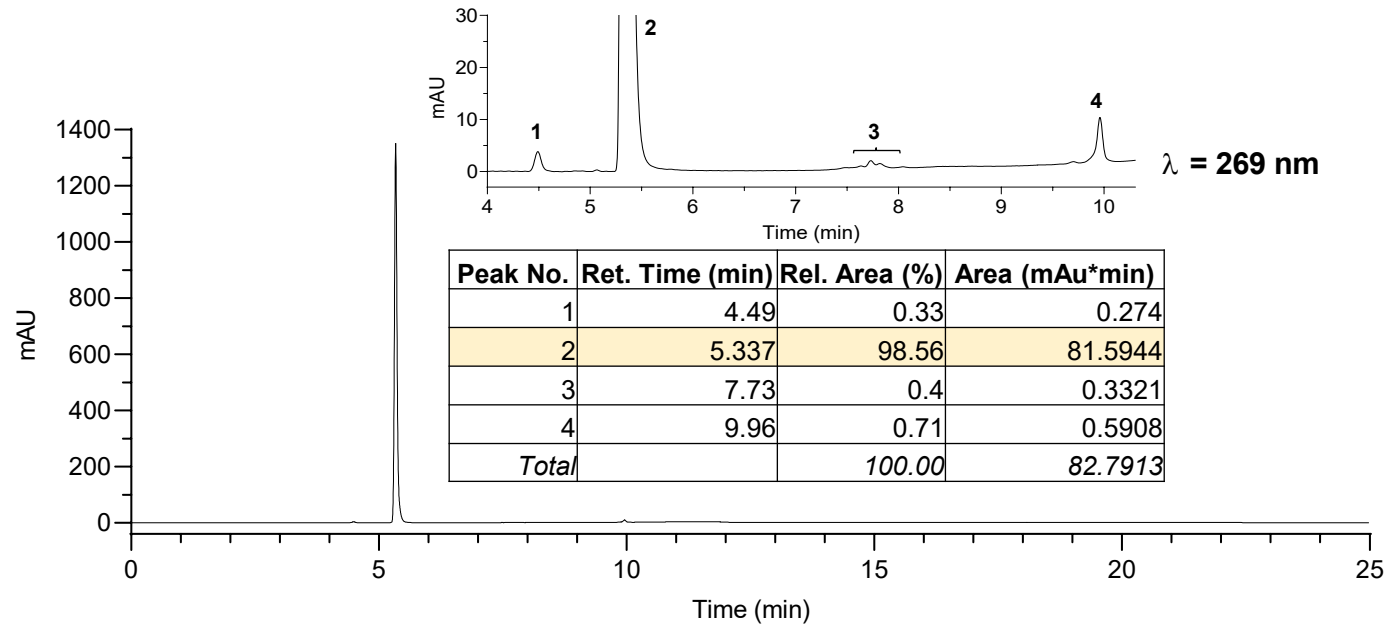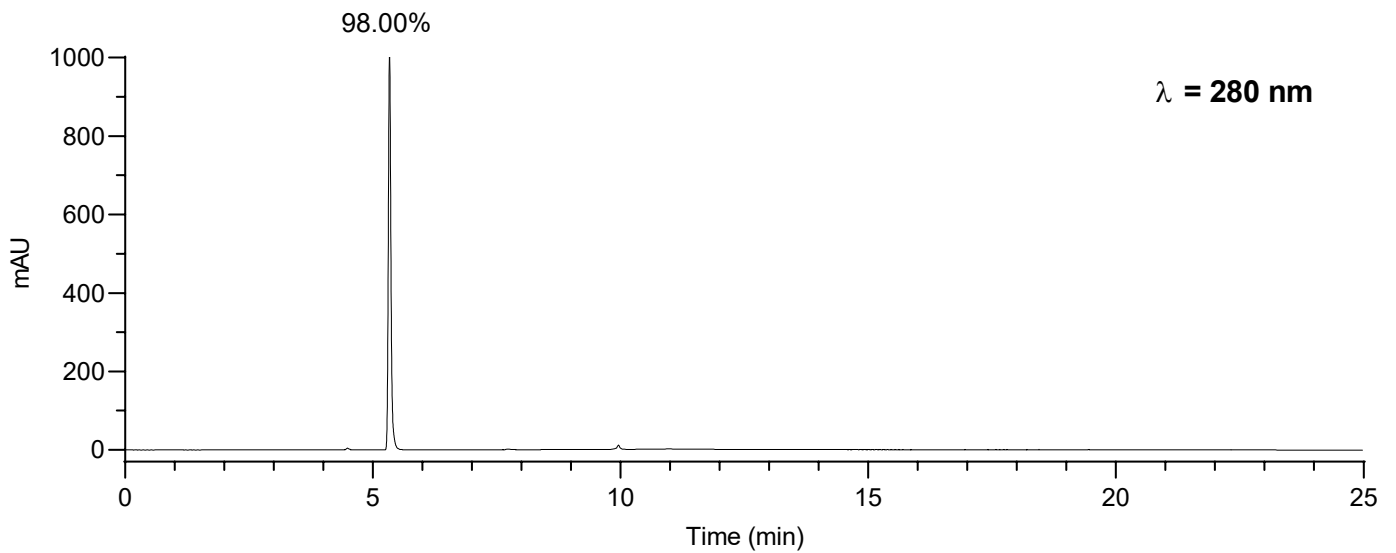

15

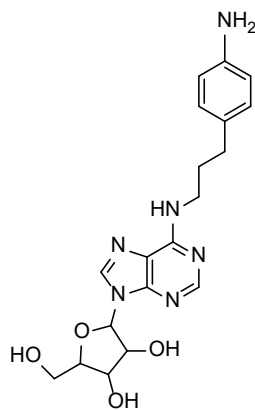

15 #1-30 RT: 0.02-0.42 AV: 30 NL: 1.59E7 T: FTMS  
+ p ESI Full ms [100.00-2000.00]

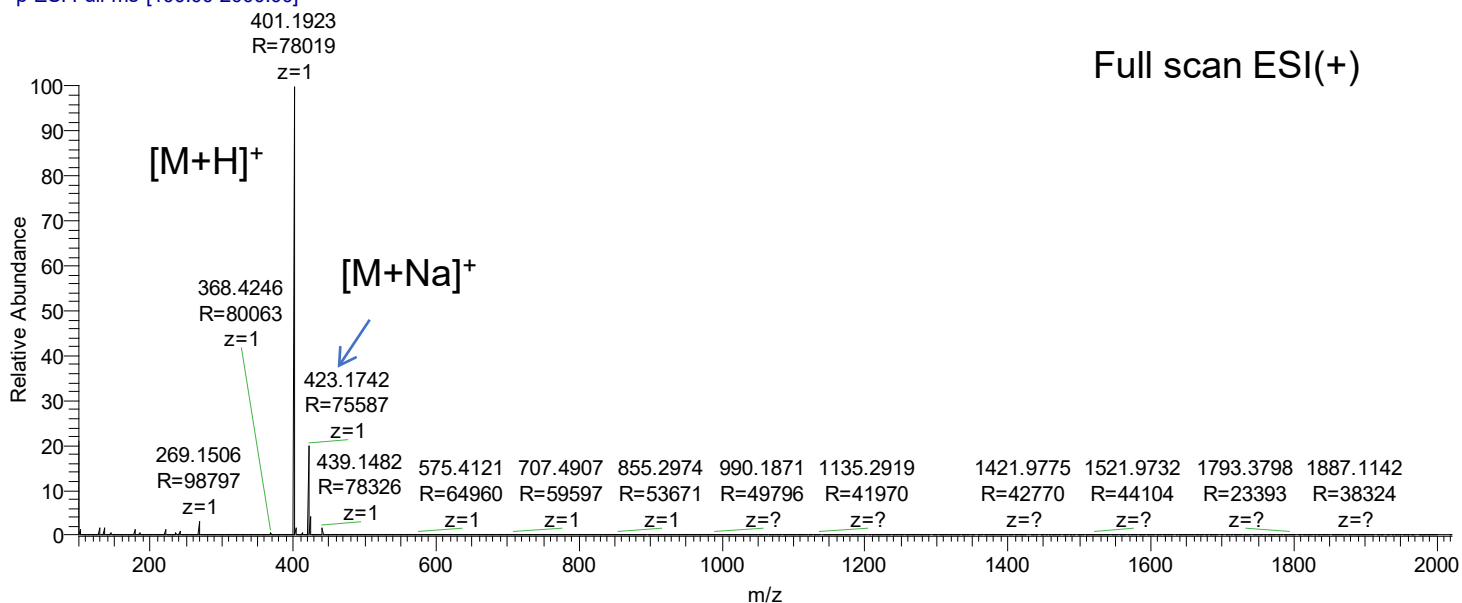

Experimental

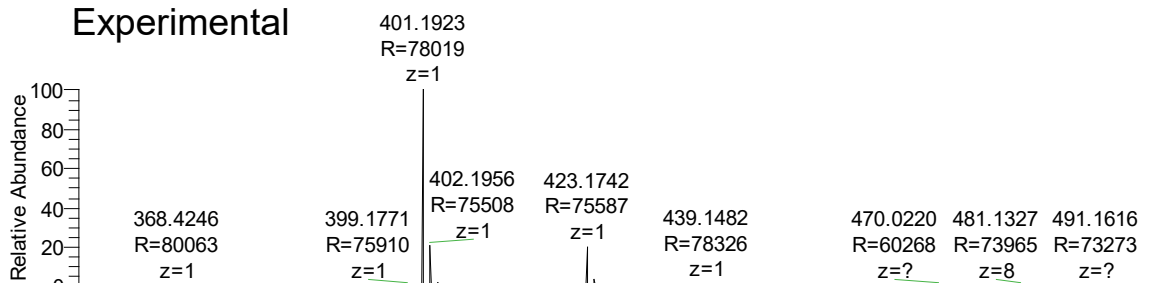

NL:  
1.59E7  
15#1-30 RT:  
0.02-0.42 AV: 30 T: FTMS +  
p ESI Full ms  
[100.00-2000.00]

Theoretical

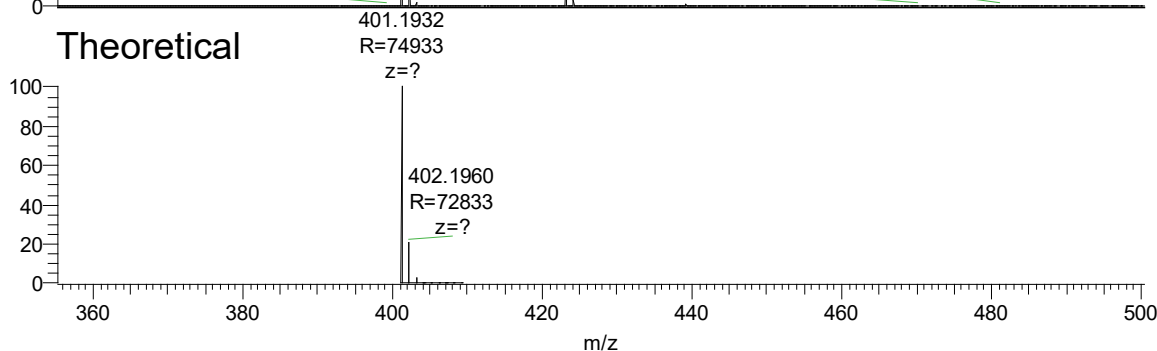

NL:  
1.85E4  
C<sub>19</sub>H<sub>24</sub>N<sub>6</sub>O<sub>4</sub> +H:  
C<sub>19</sub>H<sub>25</sub>N<sub>6</sub>O<sub>4</sub>  
p (gss, s /p:40) Chrg 1  
R: 75000 Res .Pwr. @FWHM

$\Delta m = 2.24 \text{ ppm}$



**15**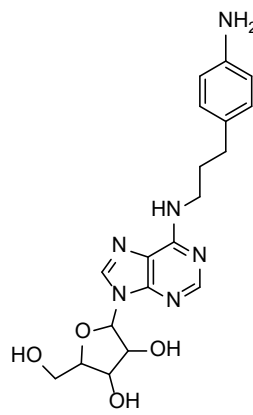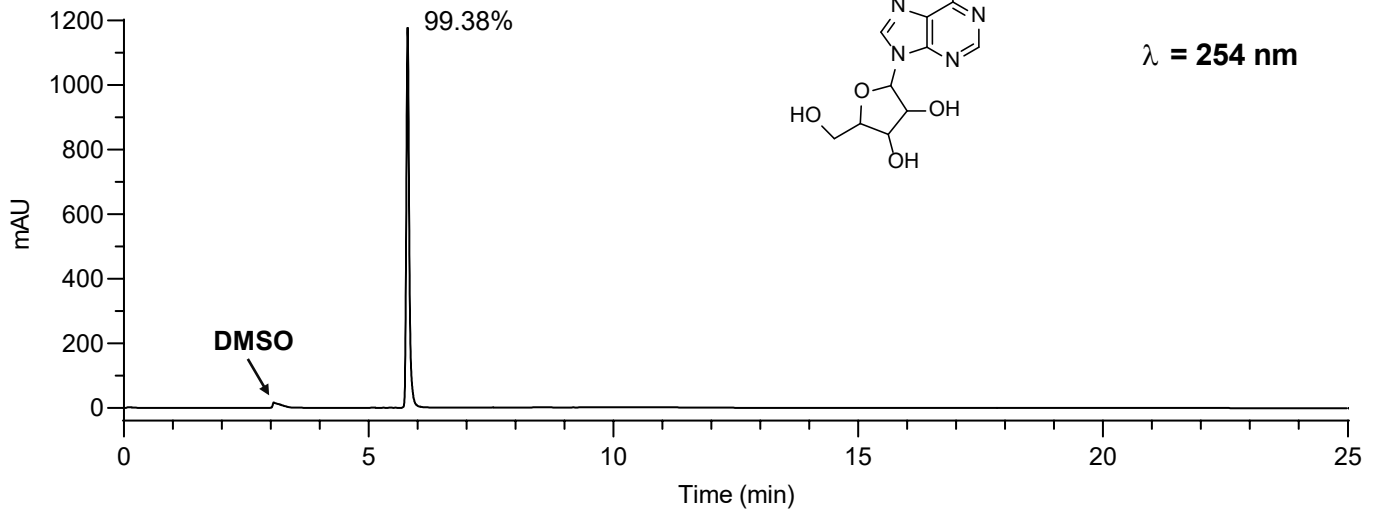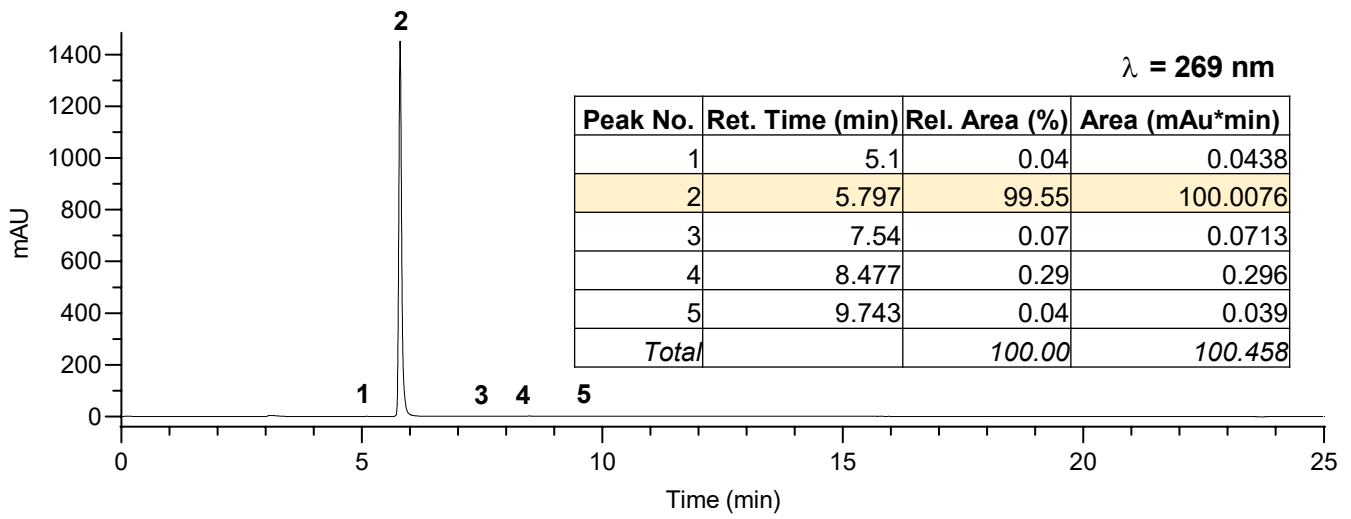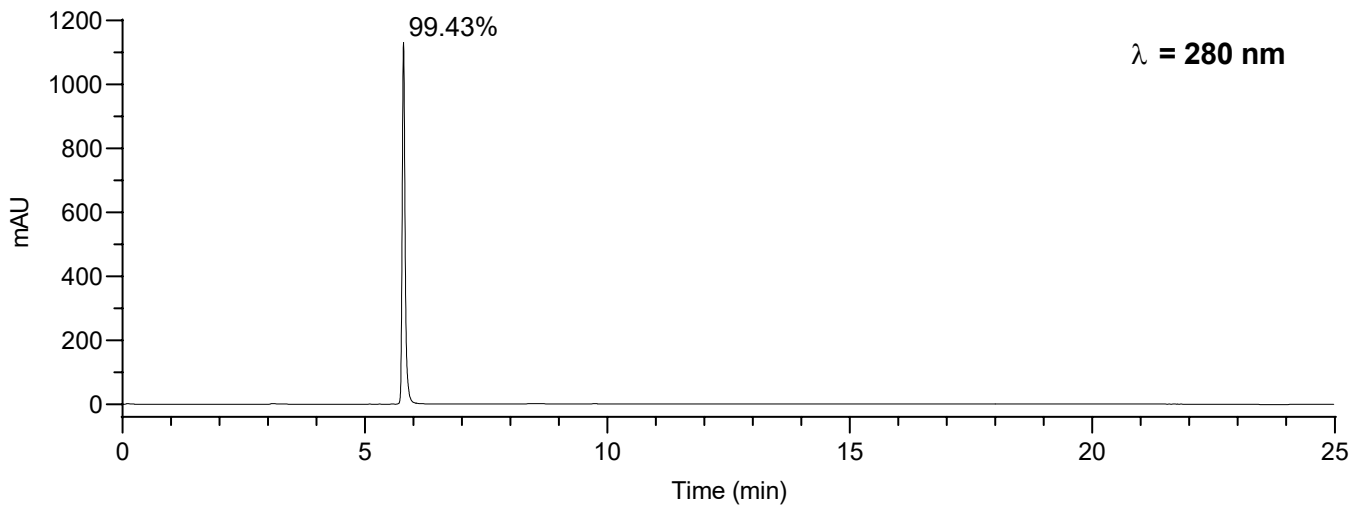

16

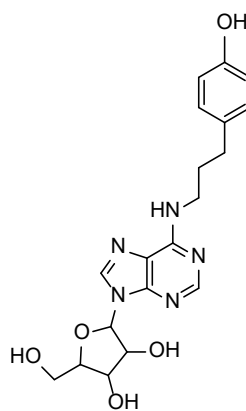

16 #1-30 RT: 0.02-0.46 AV: 30 NL: 1.34E6 T: FTMS  
+ p ESI Full ms [100.00-2000.00]

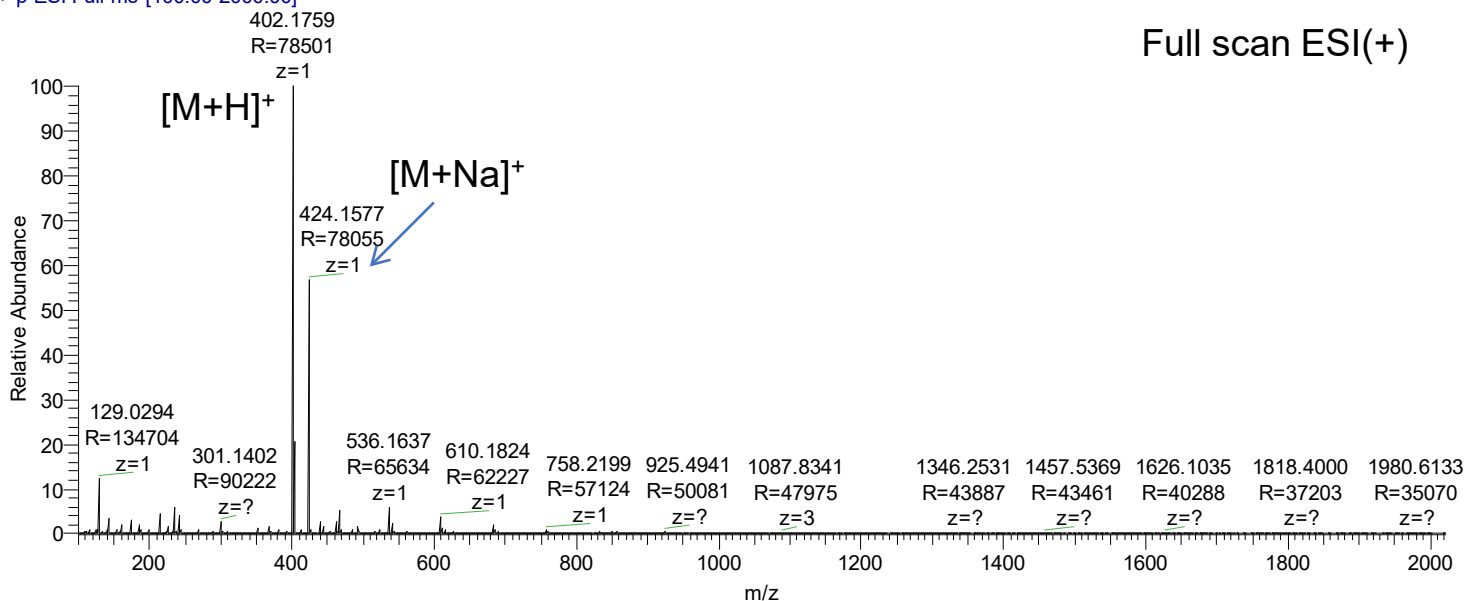

Experimental

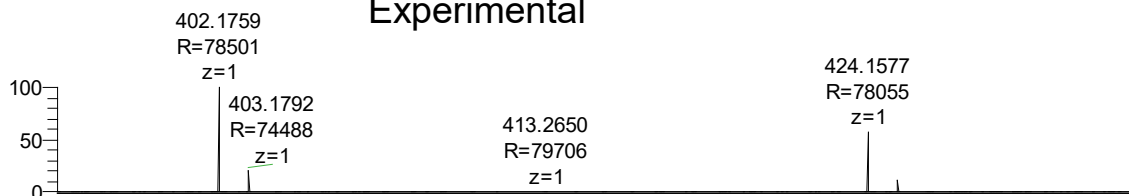

NL:  
1.34E6  
16#1-30 RT: 0.02-0.46 AV:  
30 T: FTMS + p ESI Full ms  
[100.00-2000.00]

Theoretical

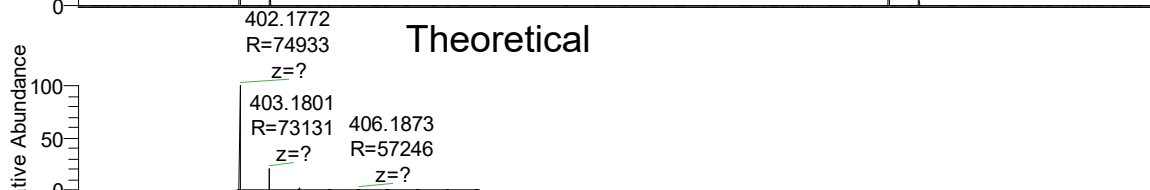

NL:  $\Delta m = 3.24 \text{ ppm}$   
1.85E4

$C_{23}H_{23}N_5O_5 + H$   
 $C_{23}H_{24}N_5O_5$   
p (gss, s /p:40) Chrg 1  
R: 75000 Res .Pwr . @FWHM

Theoretical

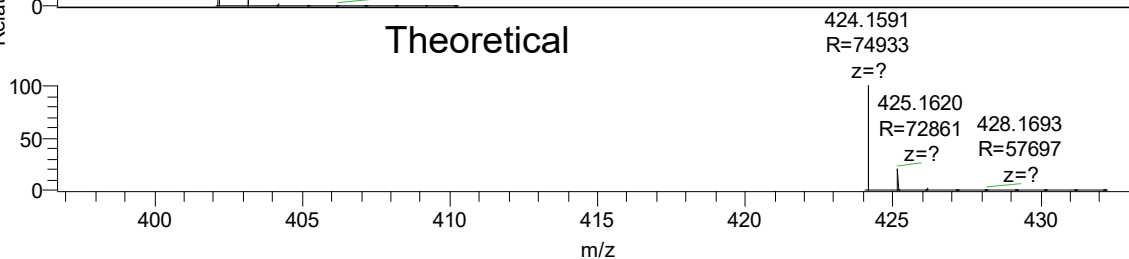

NL:  $\Delta m = 3.30 \text{ ppm}$   
1.85E4

$C_{23}H_{23}N_5O_5 + Na$   
 $C_{23}H_{23}N_5O_5Na_1$   
p (gss, s /p:40) Chrg 1  
R: 75000 Res .Pwr . @FWHM

**16**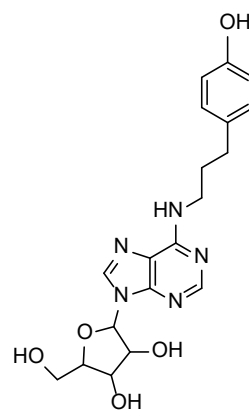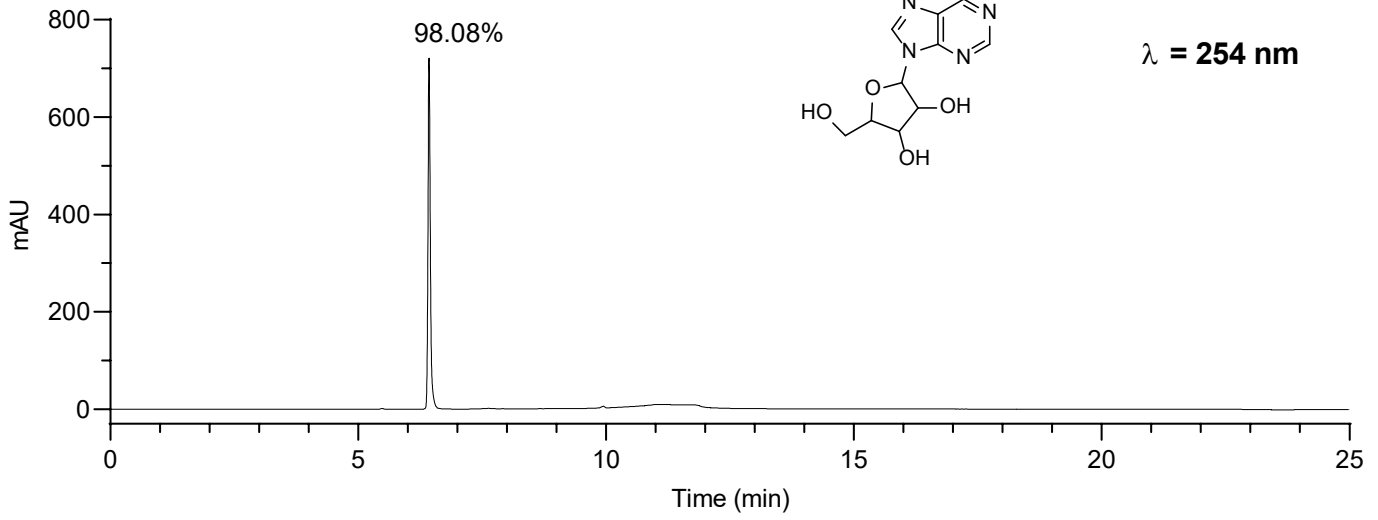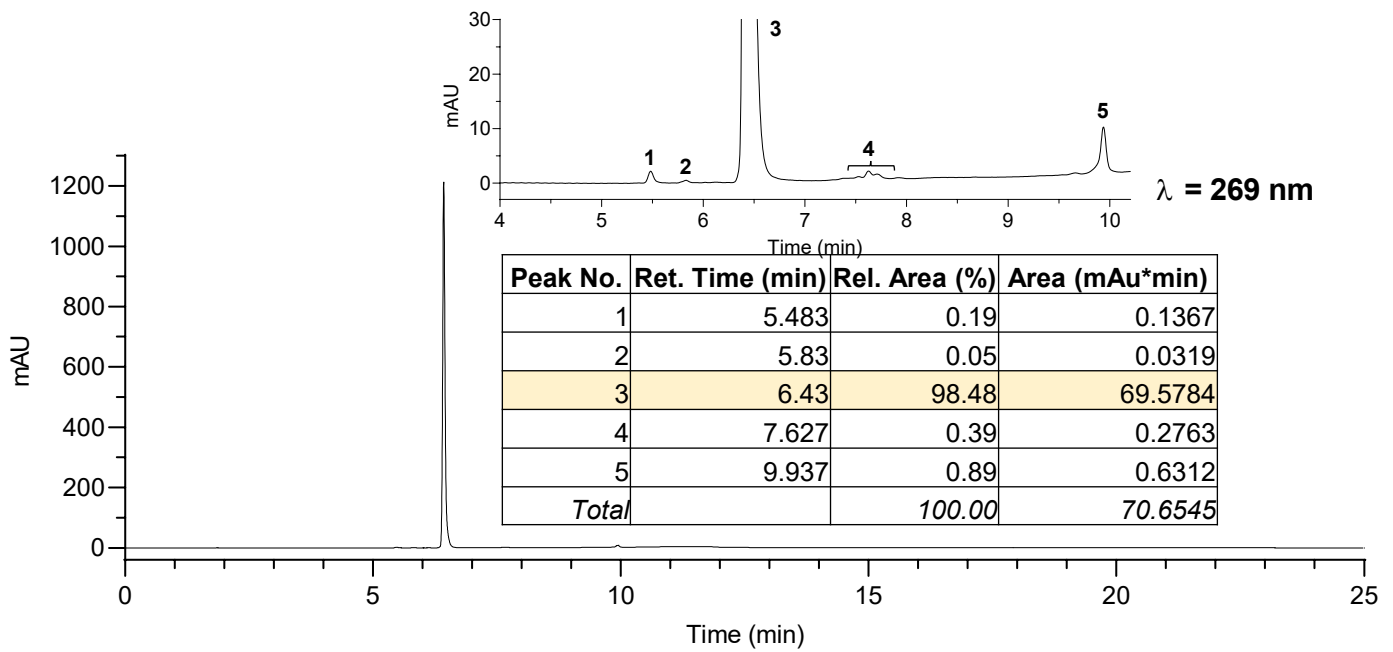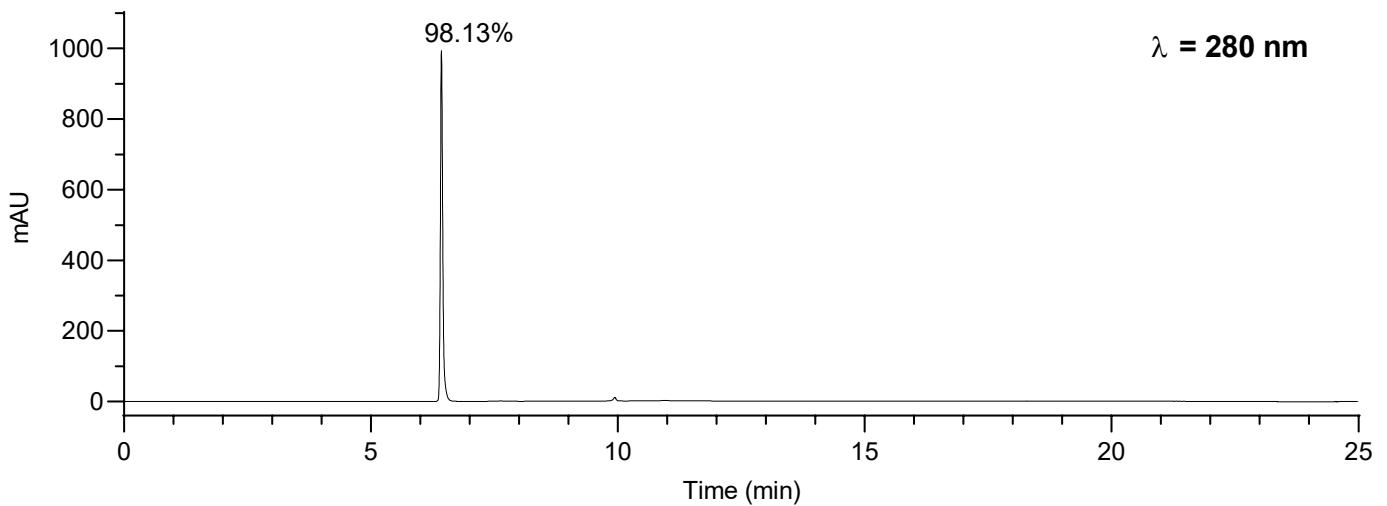

17

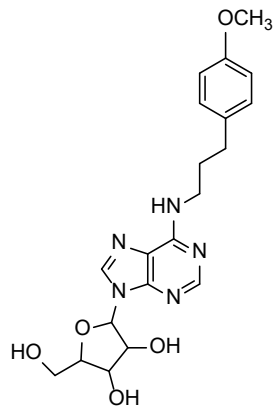

17 #1-30 RT: 0.02-0.41 AV: 30 NL: 1.79E7 T: FTMS  
+ p ESI Full ms [100.00-2000.00]

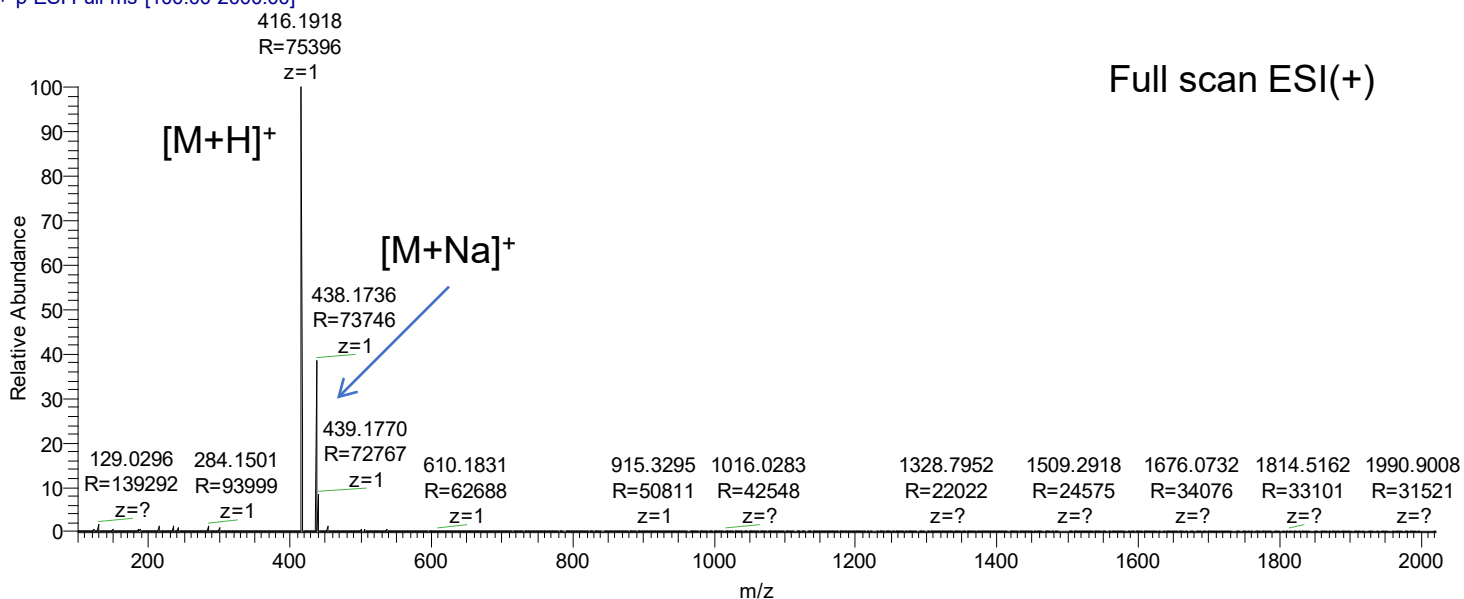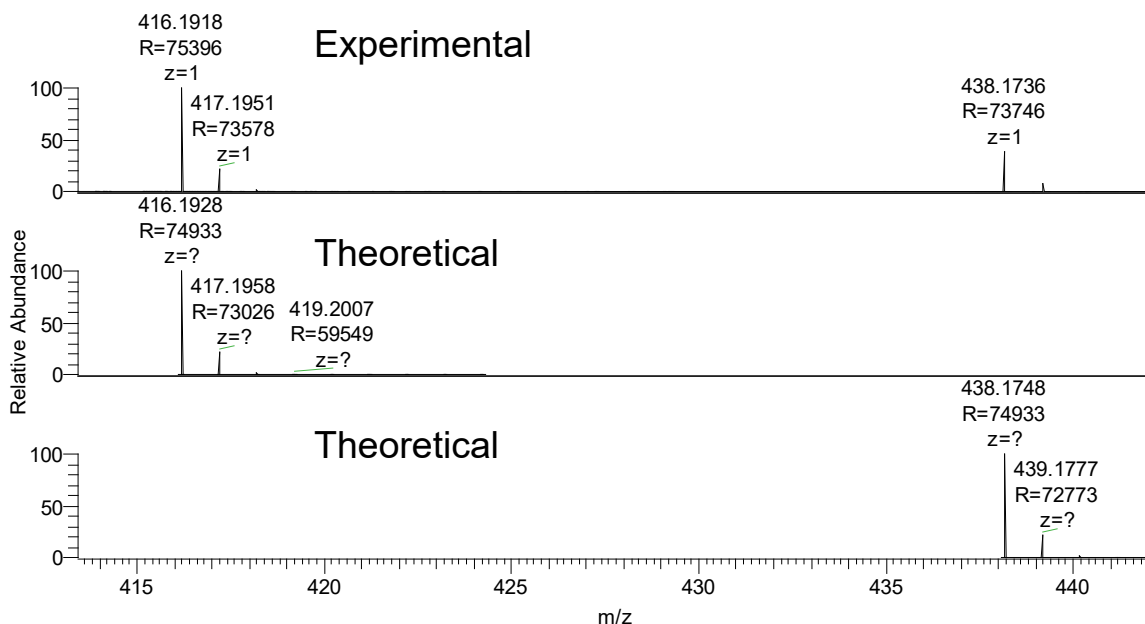

NL: 1.79E7  
17#1-30 RT: 0.02-0.41 AV: 30 T: FTMS + p ESI Full ms [100.00-2000.00]

NL:  $\Delta m = 2.40$  ppm  
1.83E4

C<sub>20</sub> H<sub>25</sub> N<sub>5</sub> O<sub>5</sub> + H:  
C<sub>20</sub> H<sub>26</sub> N<sub>5</sub> O<sub>5</sub>  
p (gss, s /p:40) Chrg 1  
R: 75000 Res .Pwr . @FWHM

NL:  $\Delta m = 2.74$  ppm  
1.83E4

C<sub>20</sub> H<sub>25</sub> N<sub>5</sub> O<sub>5</sub> + Na:  
C<sub>20</sub> H<sub>25</sub> N<sub>5</sub> O<sub>5</sub> Na<sub>1</sub>  
p (gss, s /p:40) Chrg 1  
R: 75000 Res .Pwr . @FWHM

**17**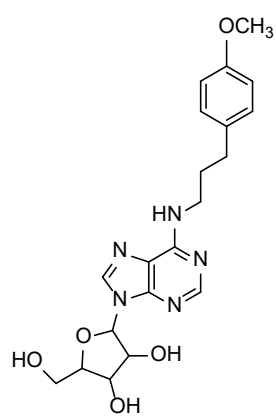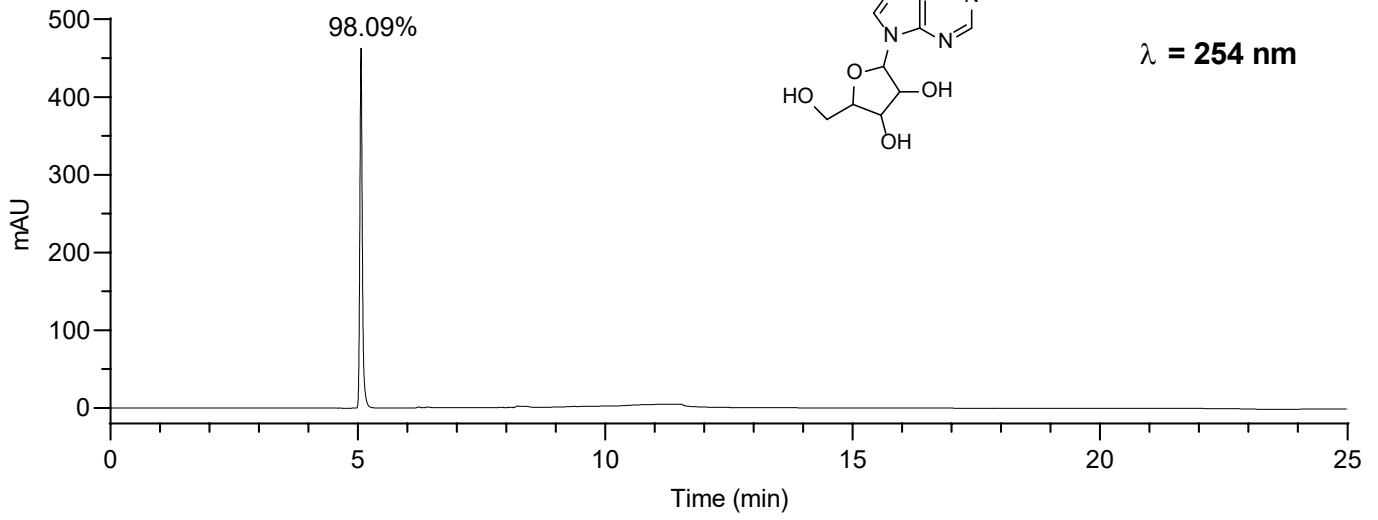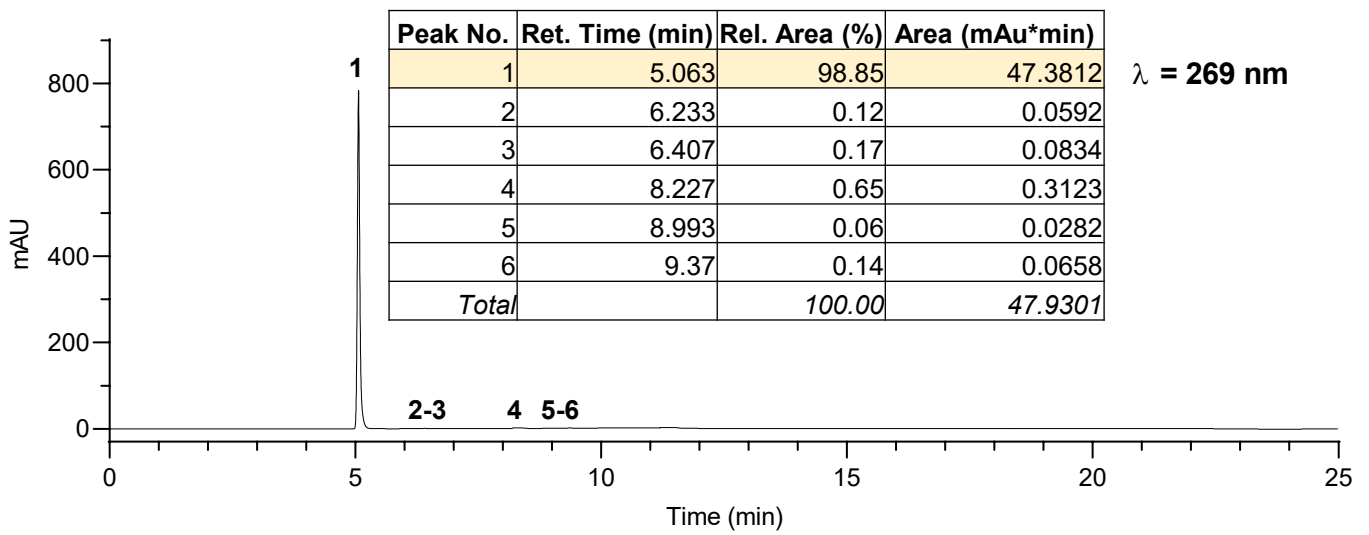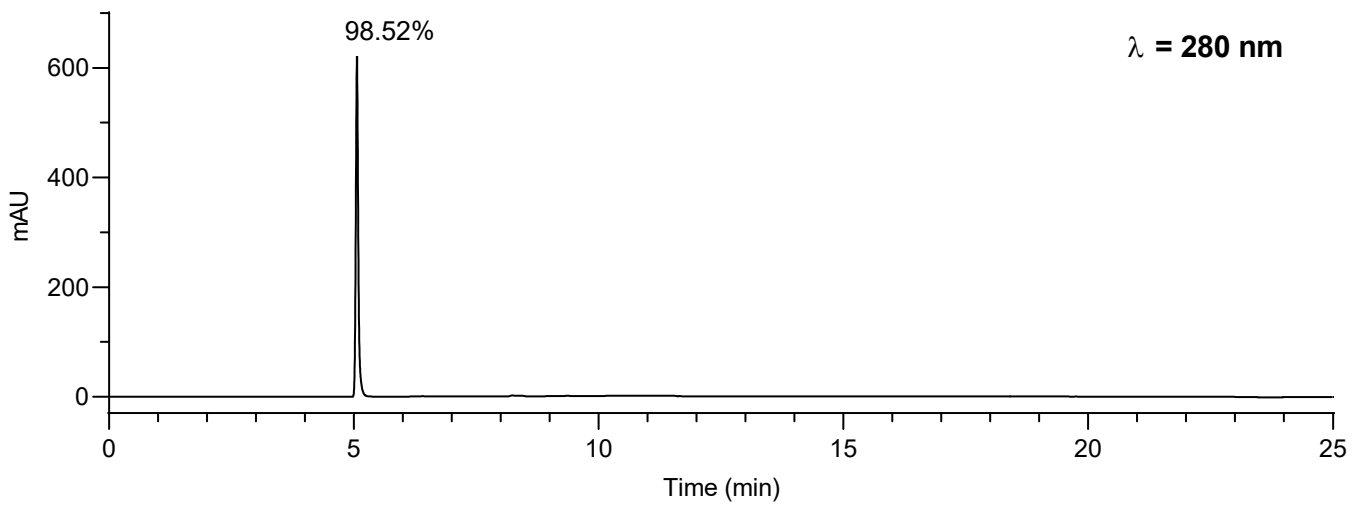

18

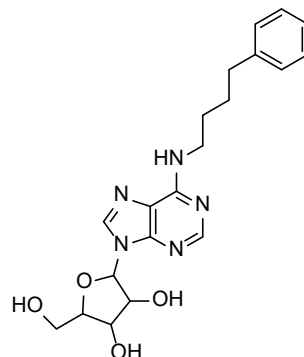

18 #1-30 RT: 0.02-0.42 AV: 30 NL: 1.24E7 T: FTMS  
+ p ESI Full ms [100.00-2000.00]

Full scan ESI(+)

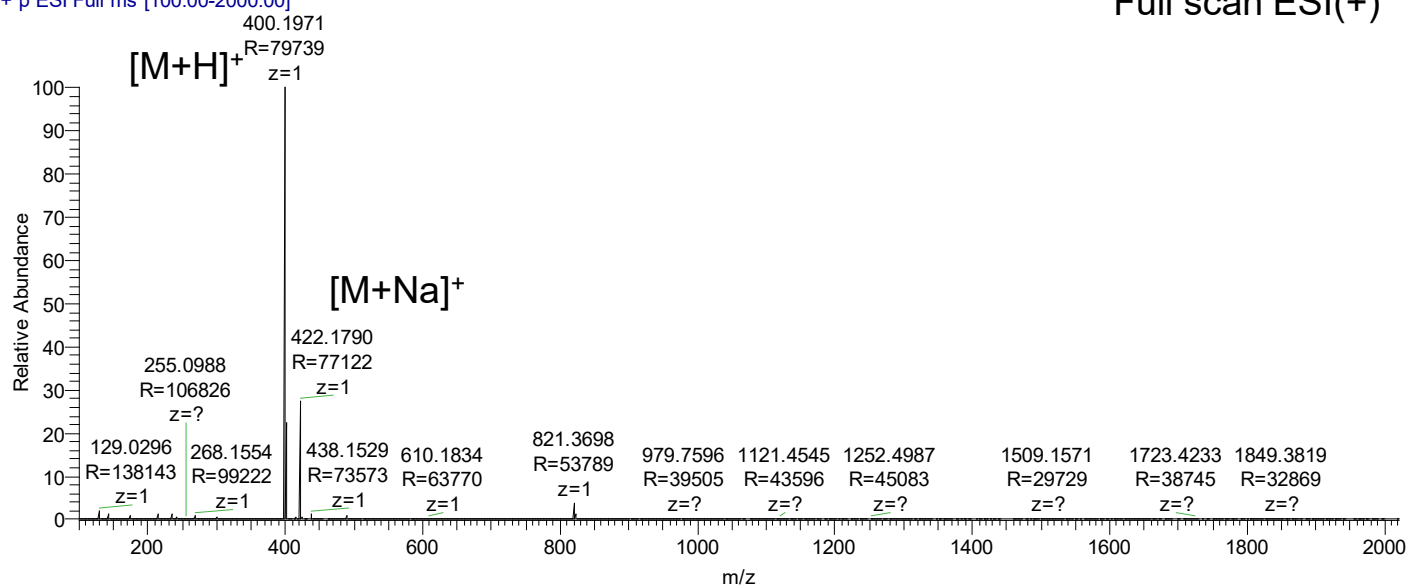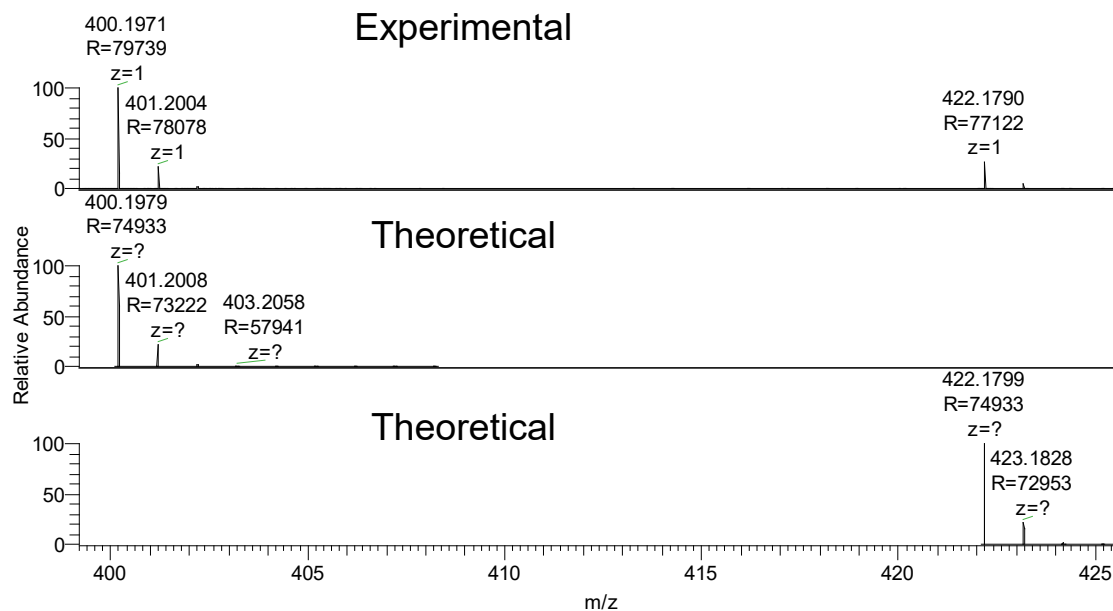

NL:  
1.24E7  
18#1-30 RT: 0.02-0.42 AV:  
30 T: FTMS + p ESI Full ms  
[100.00-2000.00]

NL:  $\Delta m = 2.00$  ppm  
1.83E4

C<sub>20</sub> H<sub>25</sub> N<sub>5</sub> O<sub>4</sub> +H:  
C<sub>20</sub> H<sub>26</sub> N<sub>5</sub> O<sub>4</sub>  
p (gss, s /p:40) Chrg 1  
R: 75000 Res .Pwr. @FWHM

NL:  $\Delta m = 2.13$  ppm  
1.83E4

C<sub>20</sub> H<sub>25</sub> N<sub>5</sub> O<sub>4</sub> +Na:  
C<sub>20</sub> H<sub>25</sub> N<sub>5</sub> O<sub>4</sub> Na<sub>1</sub>  
p (gss, s /p:40) Chrg 1  
R: 75000 Res .Pwr. @FWHM

**18**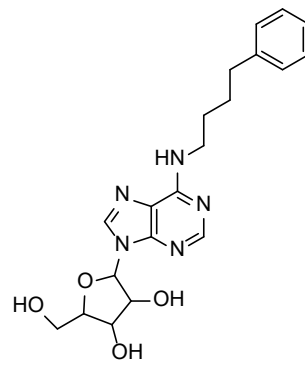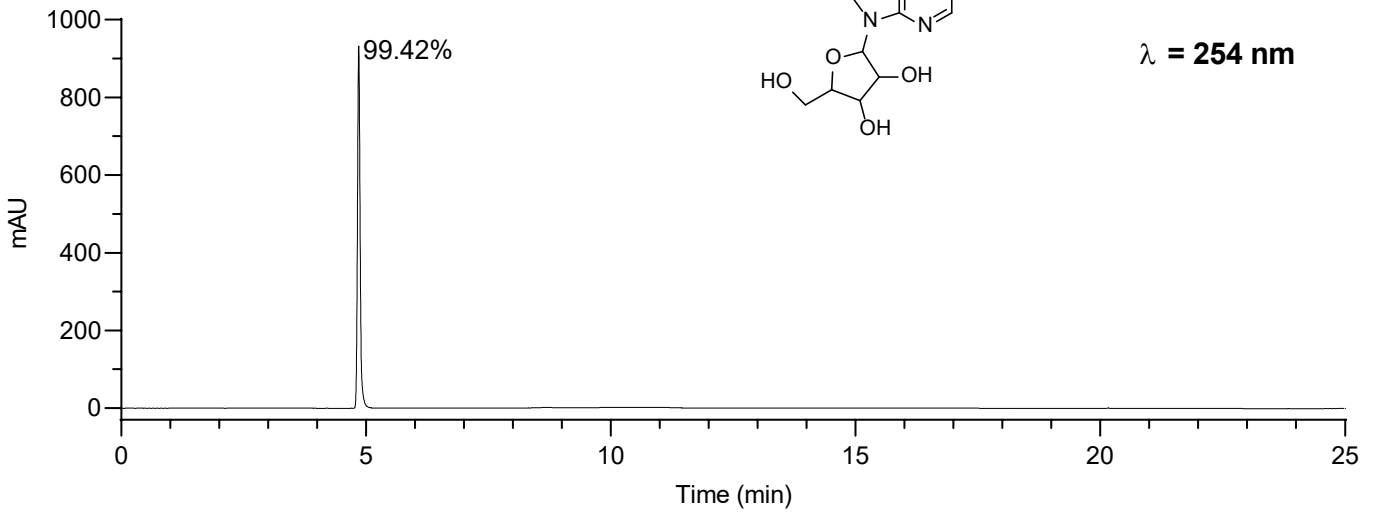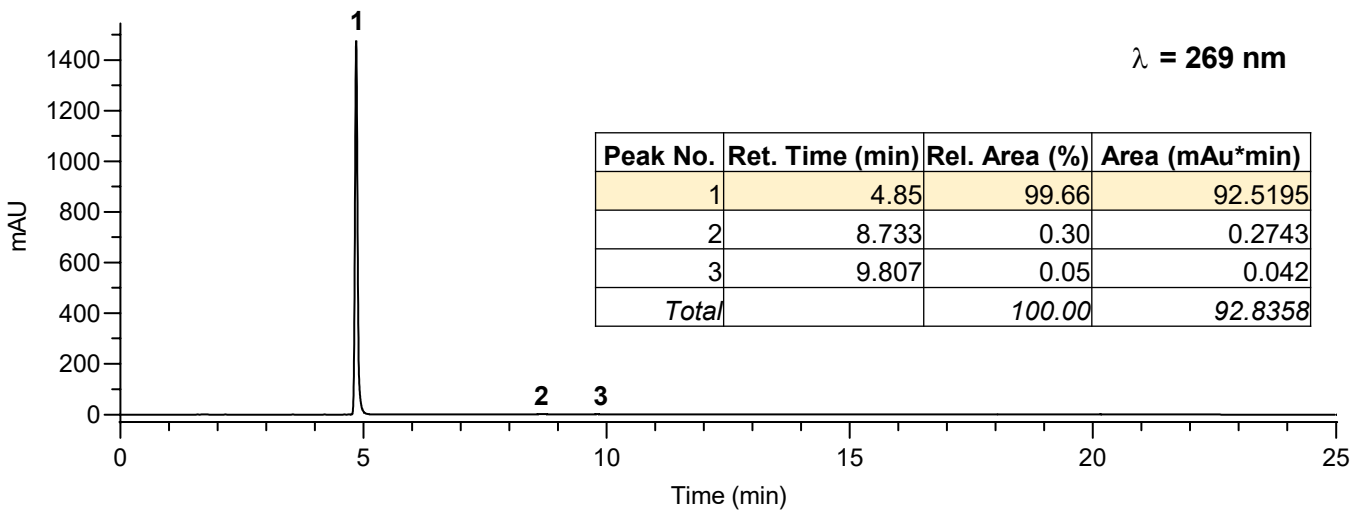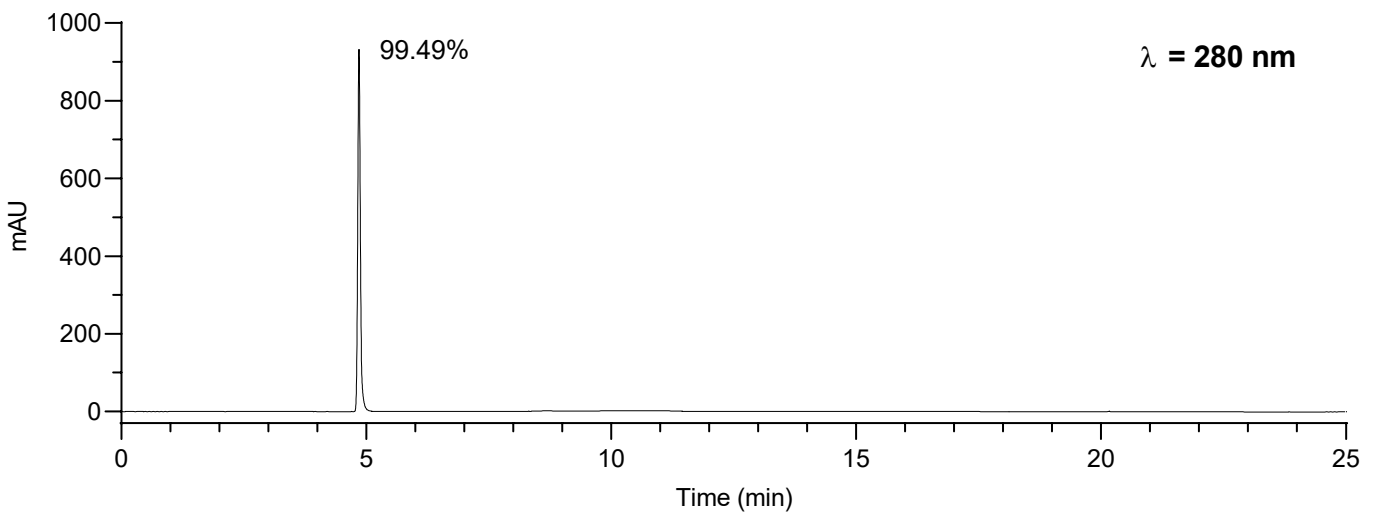

19

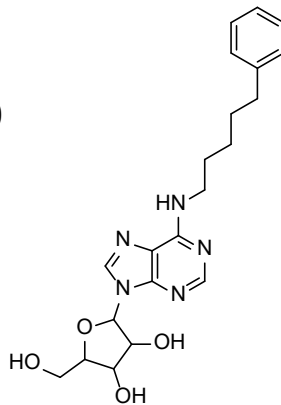

19 #1-30 RT: 0.02-0.41 AV: 30 NL: 2.54E7 T: FTMS  
+ p ESI Full ms [100.00-2000.00]

Full scan ESI(+)

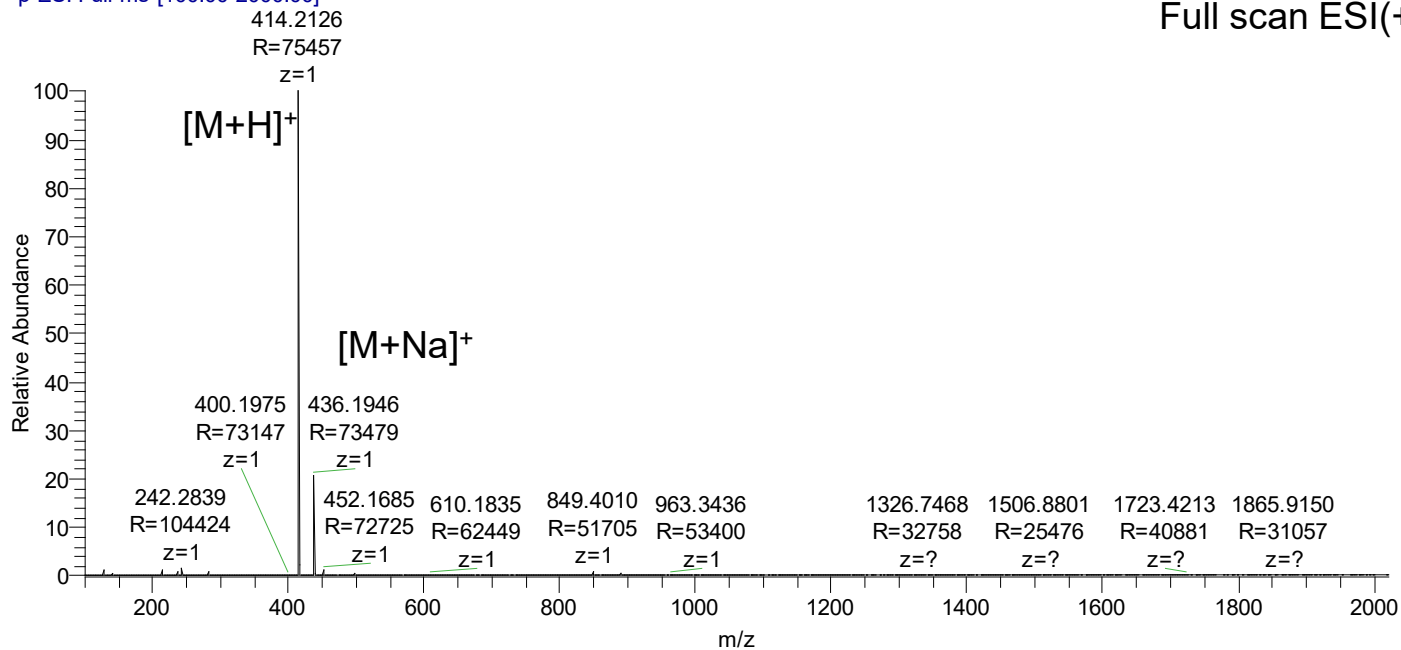

Experimental

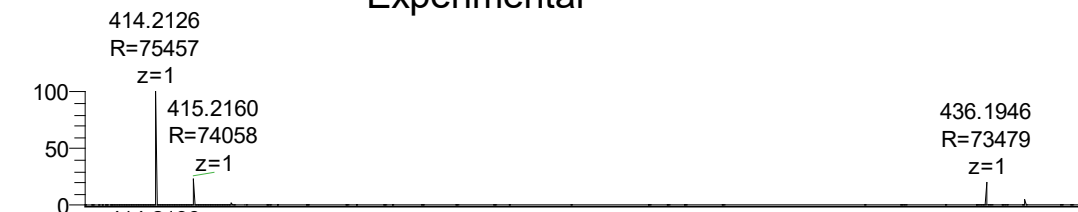

NL:  
2.54E7  
19#1-30 RT: 0.02-0.41 AV:  
30 T: FTMS + p ESI Full ms  
[100.00-2000.00]

Theoretical

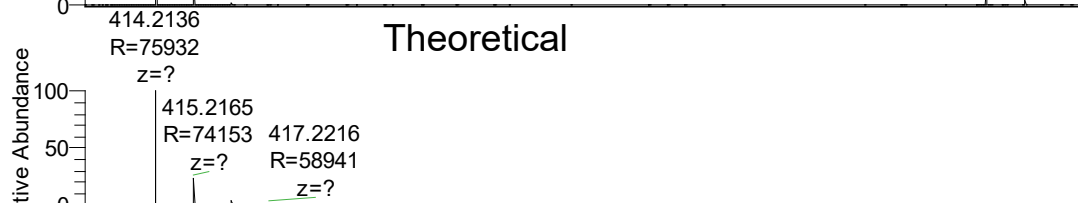

NL:  $\Delta m = 2.41$  ppm  
1.81E4

C<sub>21</sub>H<sub>27</sub>N<sub>5</sub>O<sub>4</sub> +H:  
C<sub>21</sub>H<sub>28</sub>N<sub>5</sub>O<sub>4</sub>  
p (gss, s /p:40) Chrg 1  
R: 76000 Res .Pwr . @FWHM

Theoretical

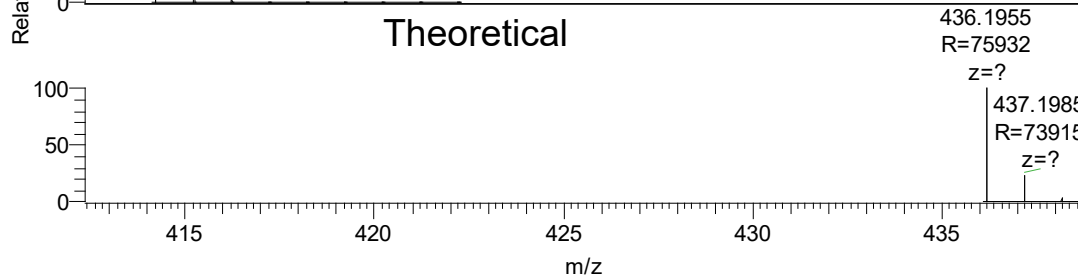

NL:  $\Delta m = 2.06$  ppm  
1.81E4

C<sub>21</sub>H<sub>27</sub>N<sub>5</sub>O<sub>4</sub> +Na:  
C<sub>21</sub>H<sub>27</sub>N<sub>5</sub>O<sub>4</sub>Na<sub>1</sub>  
p (gss, s /p:40) Chrg 1  
R: 76000 Res .Pwr . @FWHM



**19**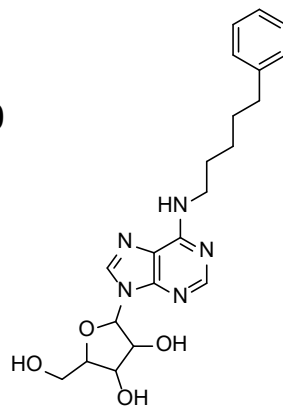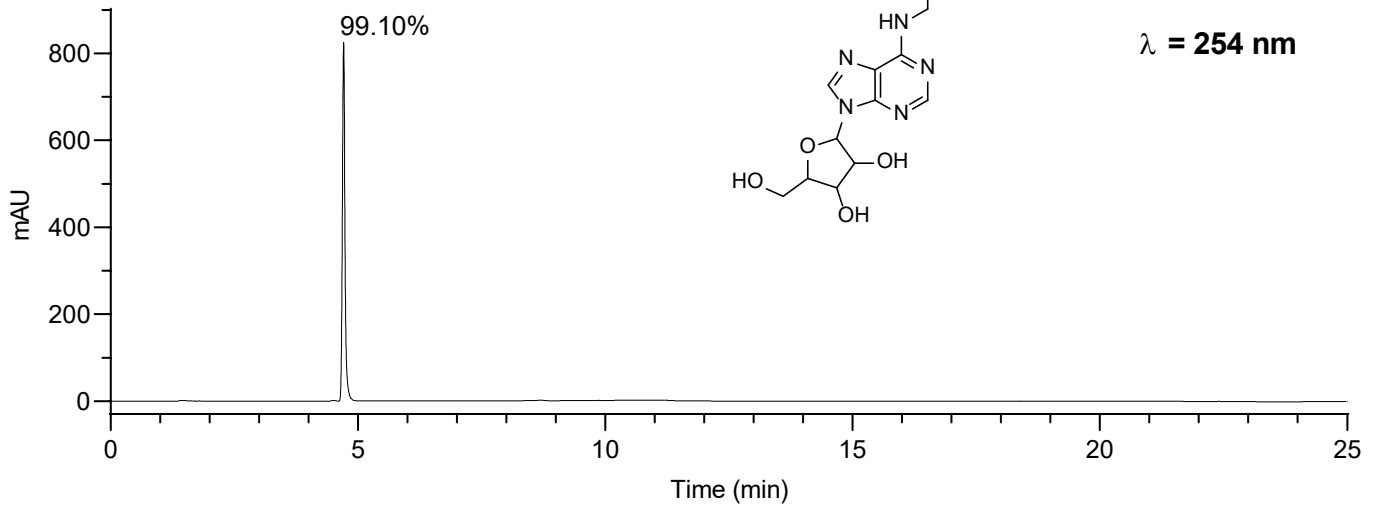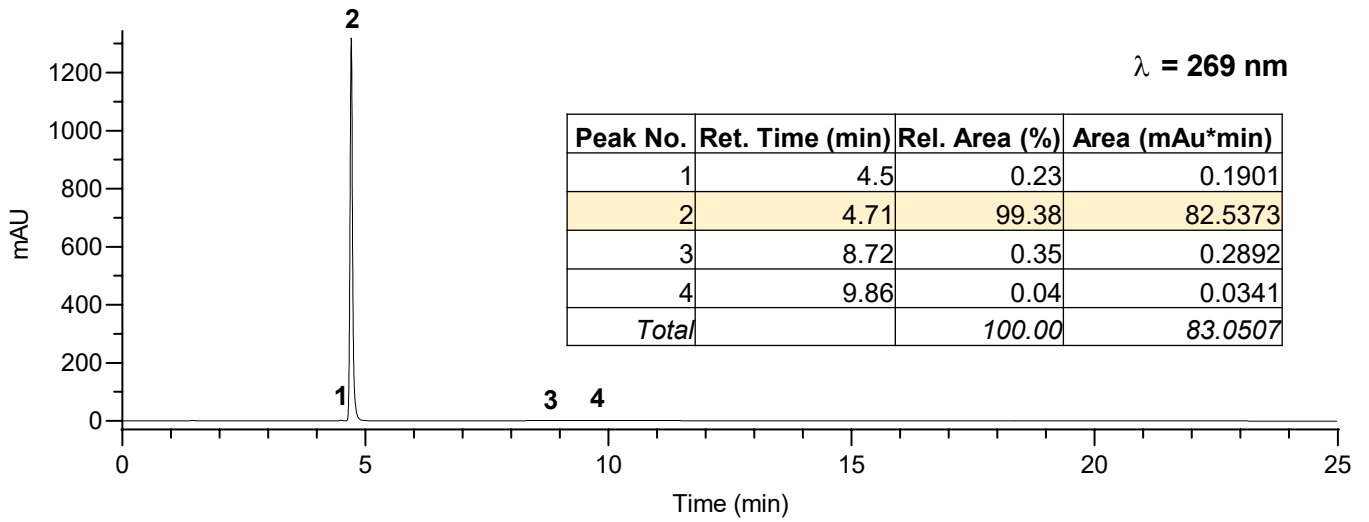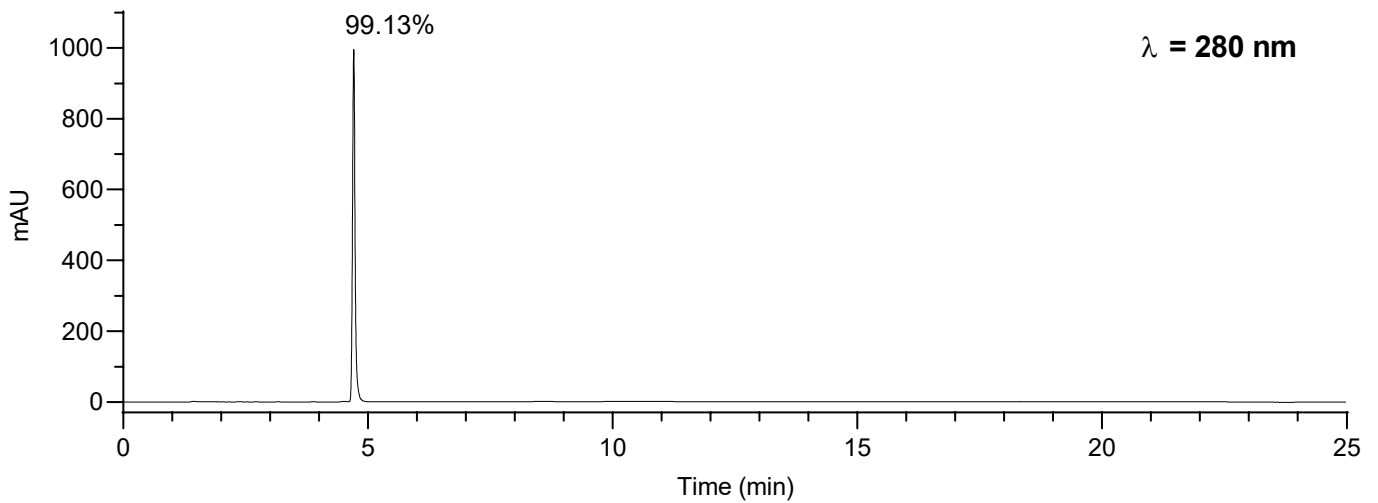

20

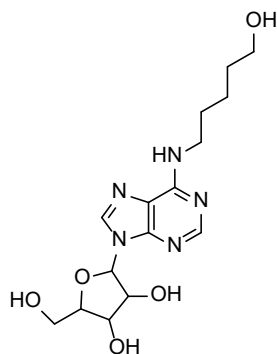

20 #1-30 RT: 0.02-0.43 AV: 30 NL: 6.88E6 T: FTMS  
+ p ESI Full ms [100.00-2000.00]

Full scan ESI(+)

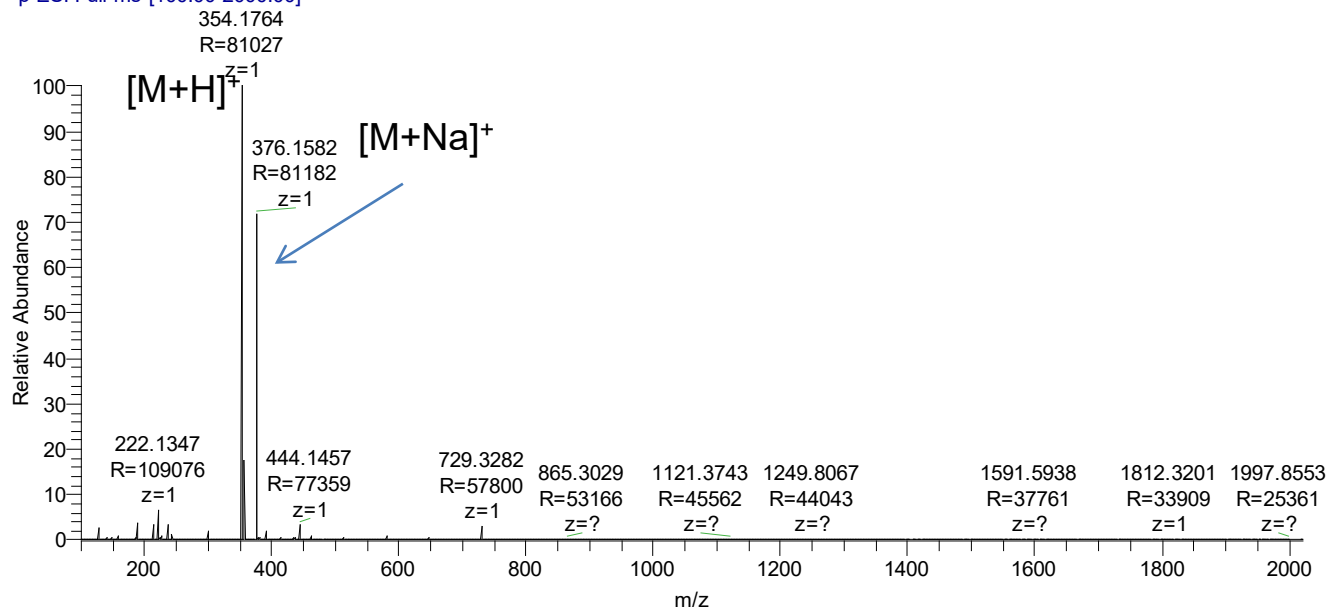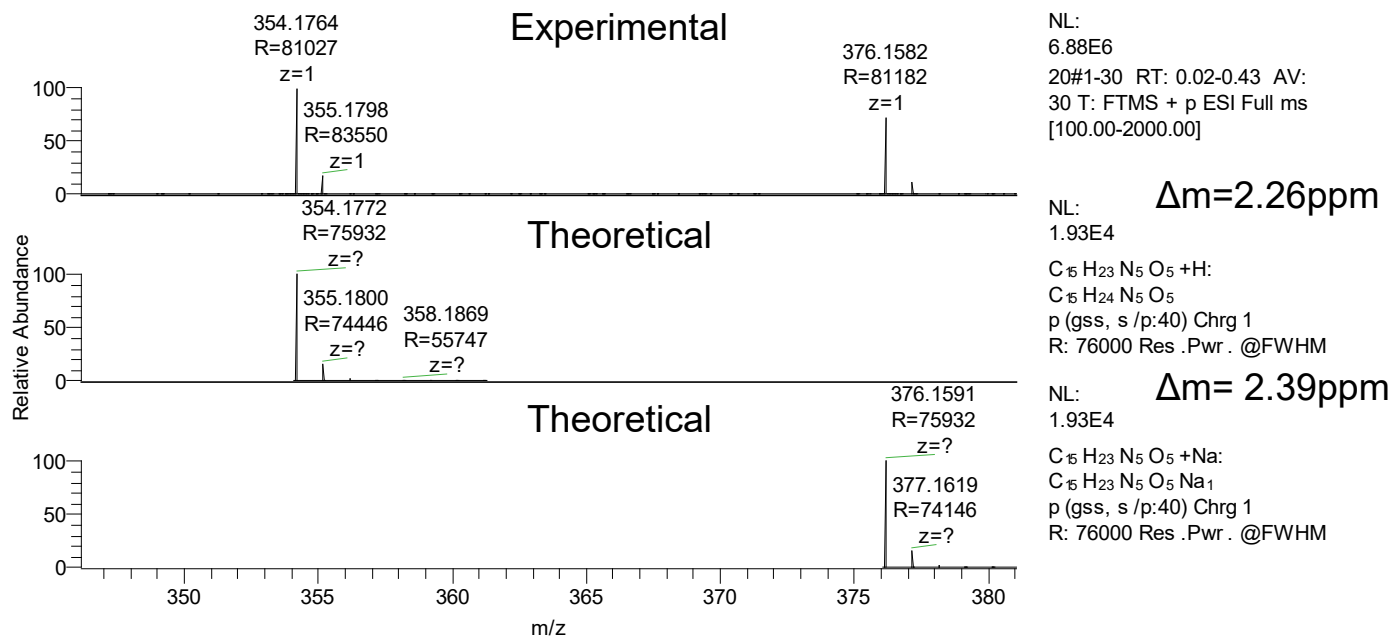

20

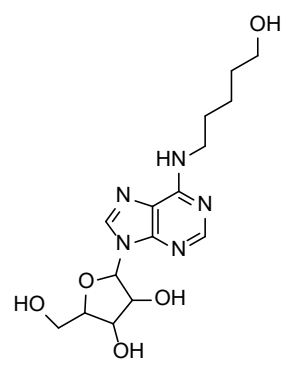

$\lambda = 254 \text{ nm}$

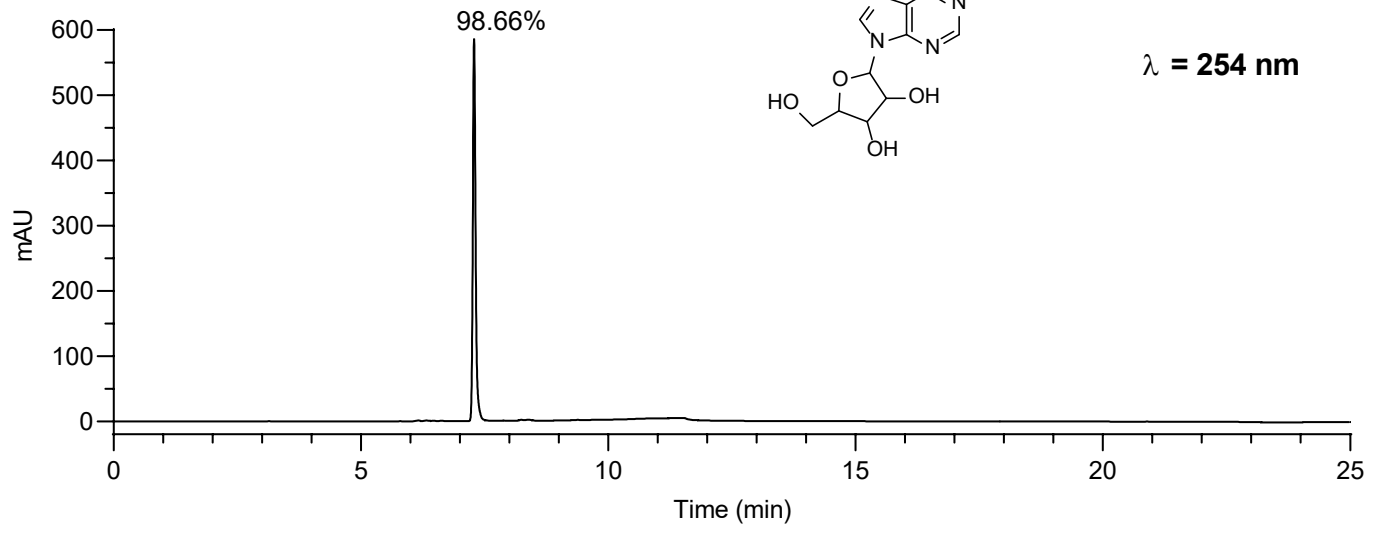

$\lambda = 269 \text{ nm}$

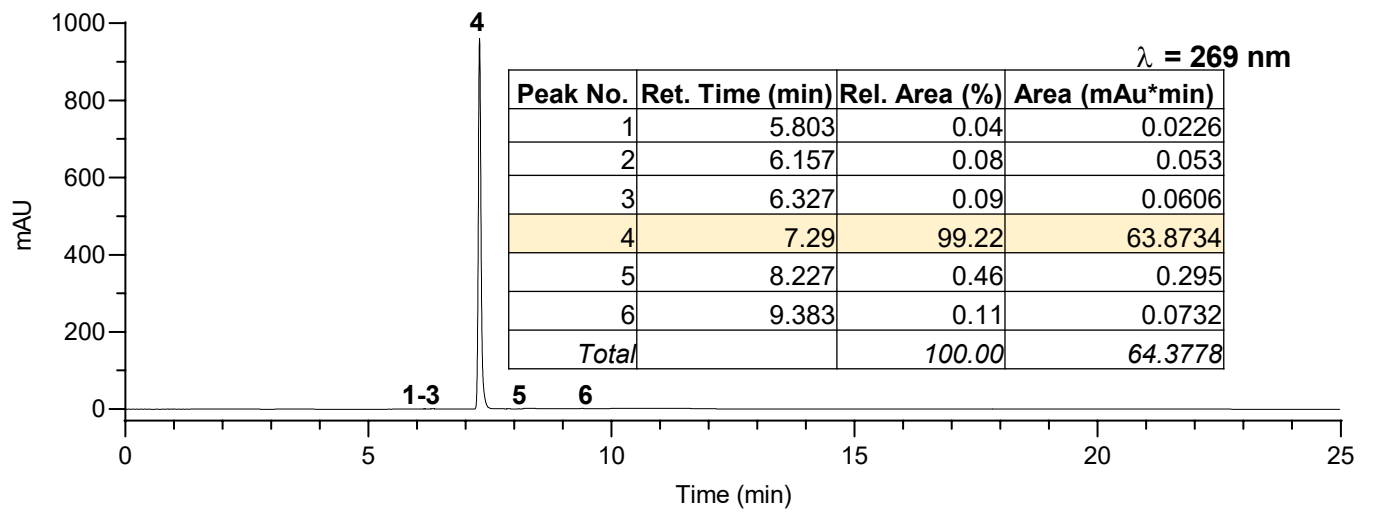

$\lambda = 280 \text{ nm}$

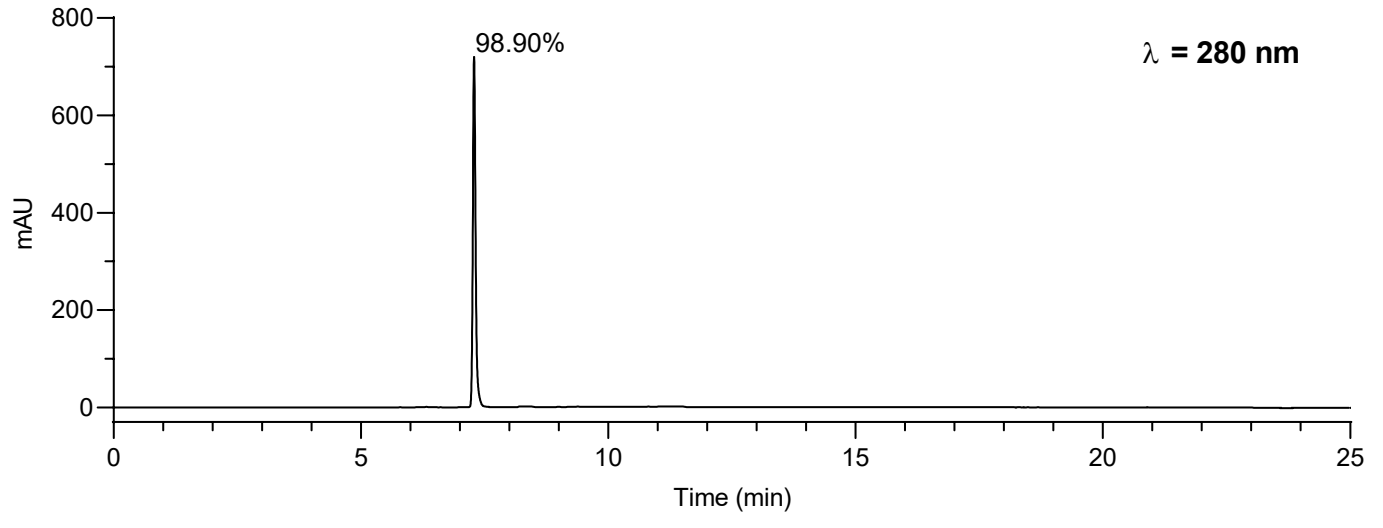

21

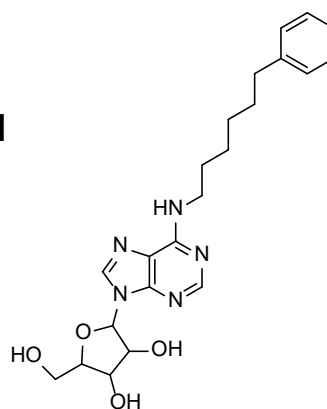

21 #1-29 RT: 0.02-0.40 AV: 29 NL: 2.48E7 T: FTMS  
+ p ESI Full ms [100.00-2000.00]

Full scan ESI(+)

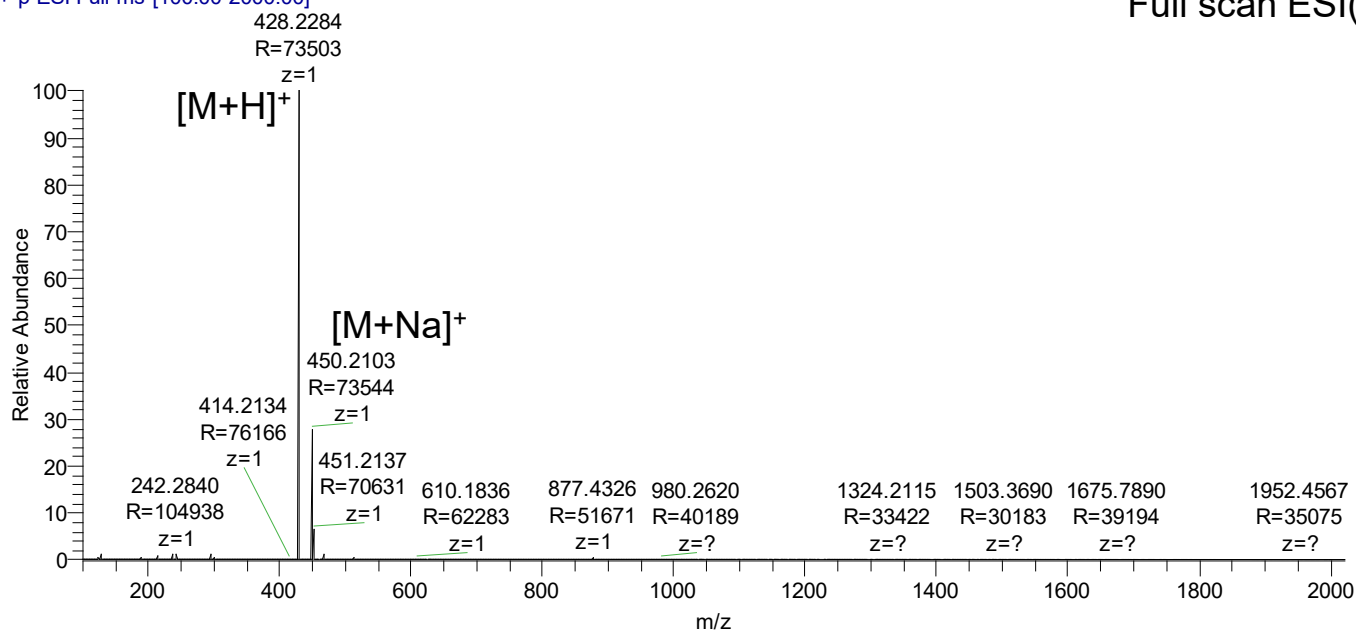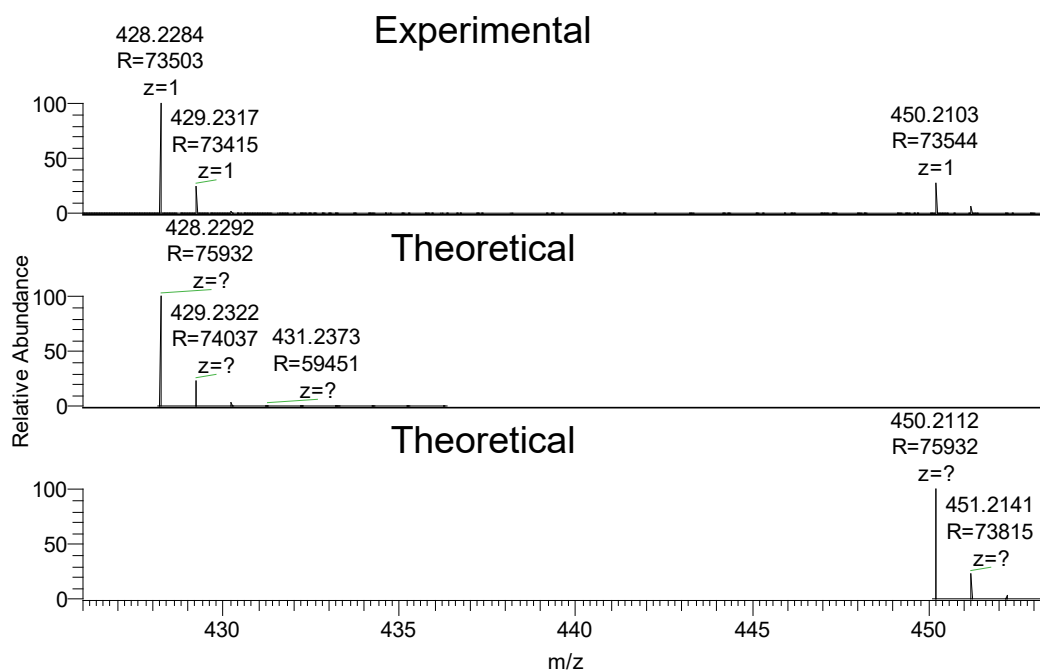

NL:  
2.48E7  
21#1-29 RT: 0.02-0.40 AV:  
29 T: FTMS + p ESI Full ms  
[100.00-2000.00]

NL:  $\Delta m = 1.87$  ppm  
1.79E4

C<sub>22</sub>H<sub>29</sub>N<sub>5</sub>O<sub>4</sub> +H:  
C<sub>22</sub>H<sub>30</sub>N<sub>5</sub>O<sub>4</sub>  
p (gss, s /p:40) Chrg 1  
R: 76000 Res .Pwr . @FWHM

NL:  $\Delta m = 2.00$  ppm  
1.79E4

C<sub>22</sub>H<sub>29</sub>N<sub>5</sub>O<sub>4</sub> +Na:  
C<sub>22</sub>H<sub>29</sub>N<sub>5</sub>O<sub>4</sub>Na<sub>1</sub>  
p (gss, s /p:40) Chrg 1  
R: 76000 Res .Pwr . @FWHM

**21**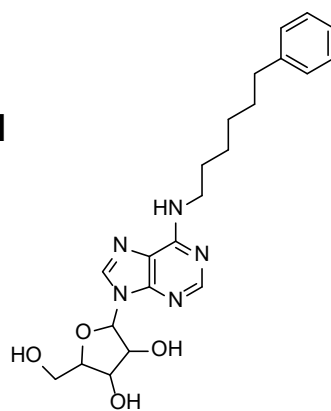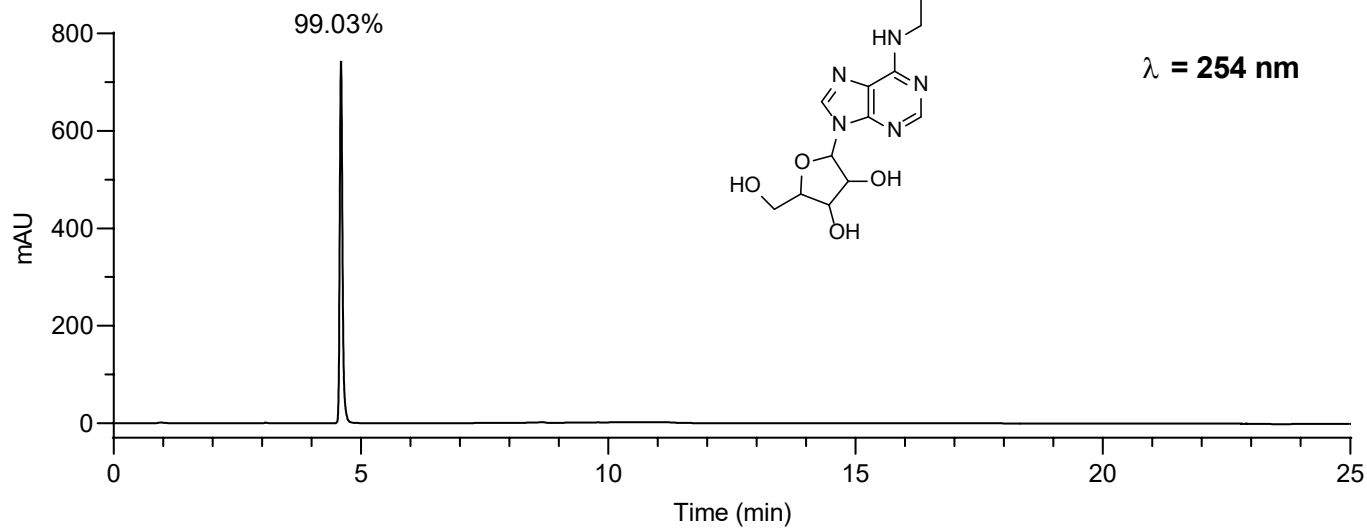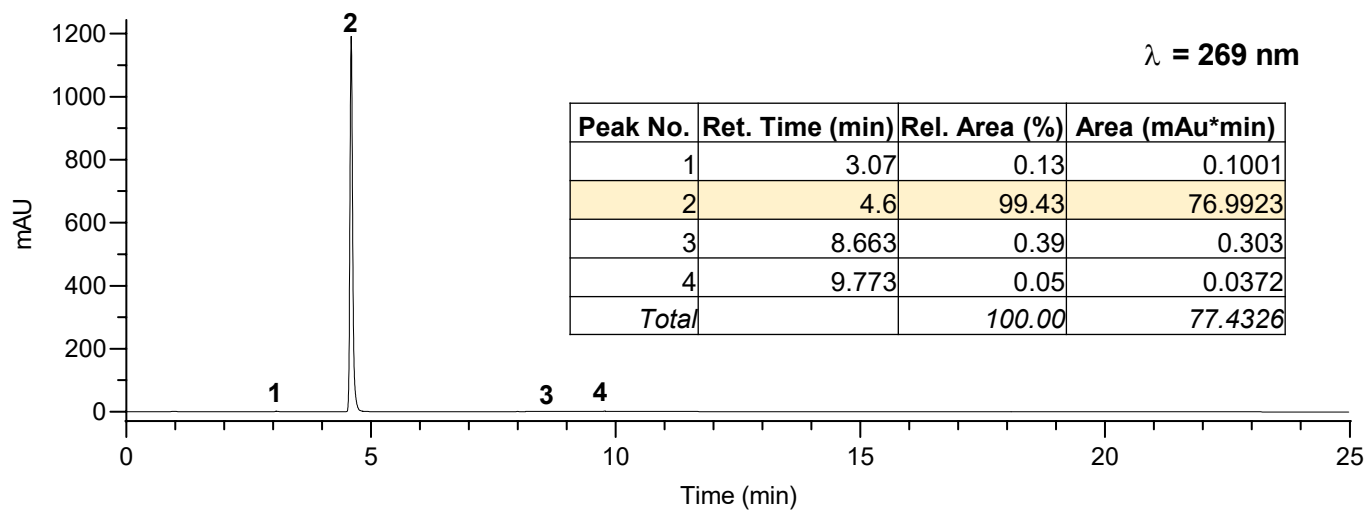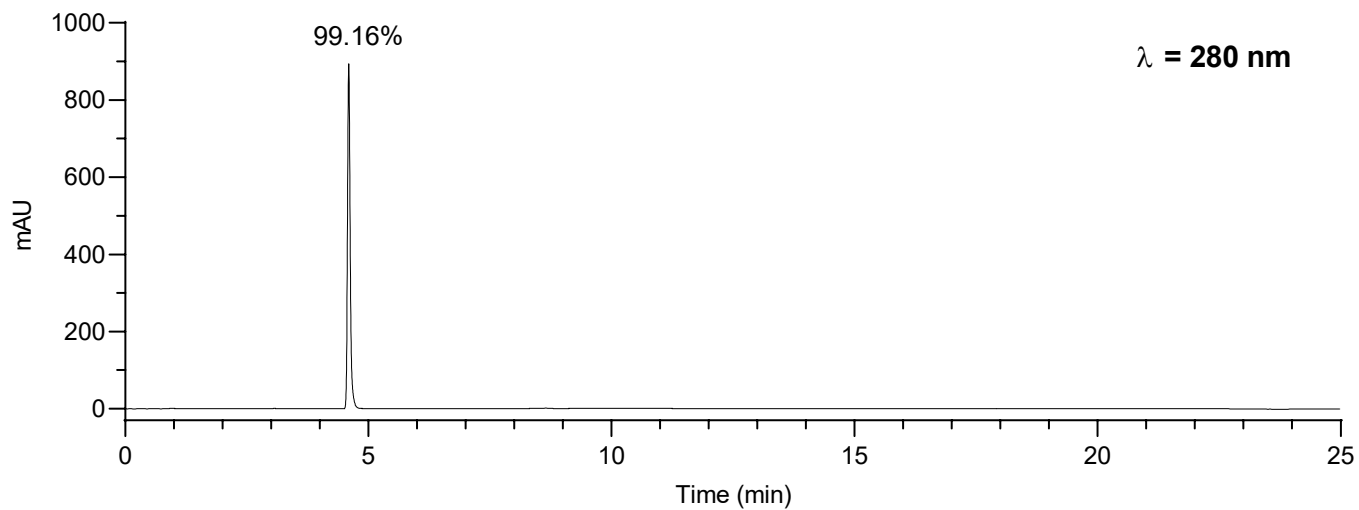

22

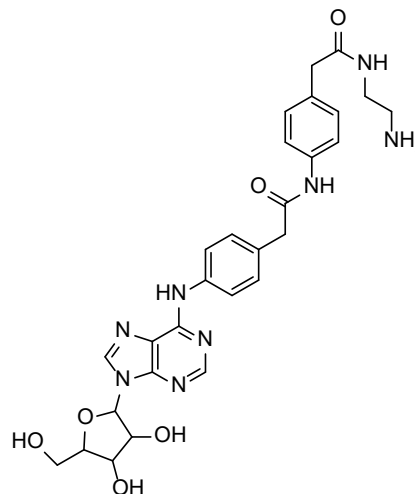

22 #1-30 RT: 0.02-0.41 AV: 30 NL: 9.48E7 T: FTMS  
+ p ESI Full ms [100.00-2000.00]

Full scan ESI(+)

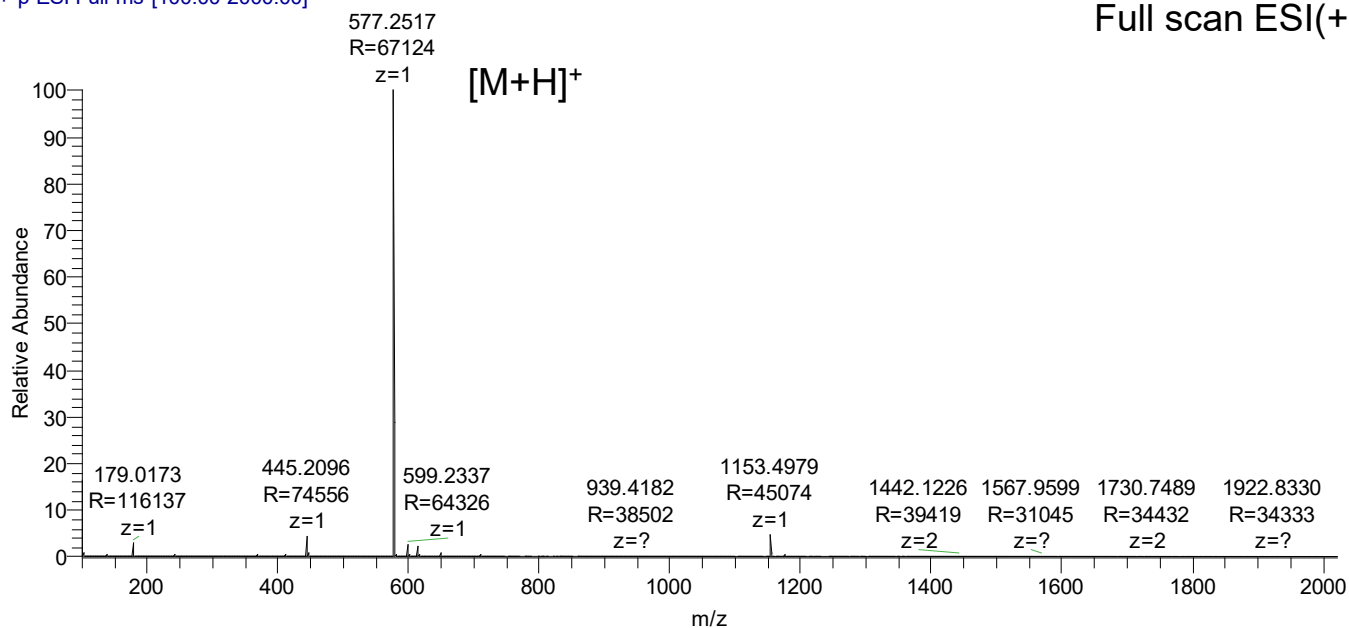

Experimental

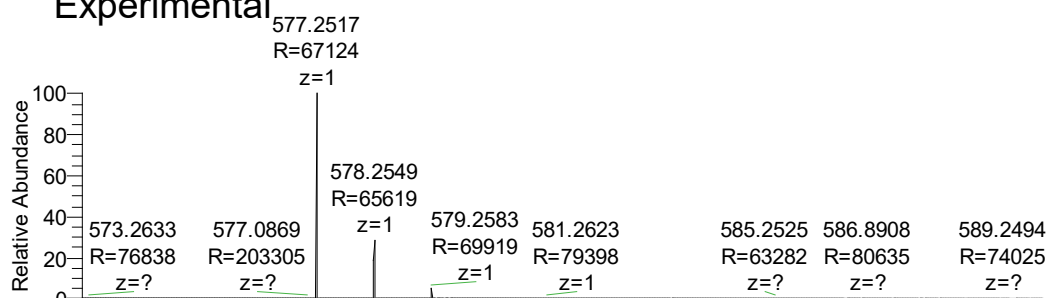

NL:  
9.48E7  
22#1-30 RT:  
0.02-0.41 AV: 30 T: FTMS +  
p ESI Full ms  
[100.00-2000.00]

Theoretical

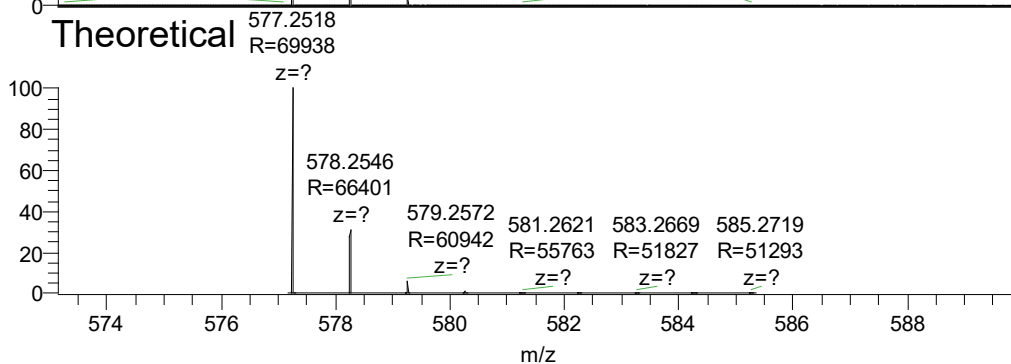

NL:  
1.66E4  
C<sub>28</sub> H<sub>32</sub> N<sub>8</sub> O<sub>6</sub> +H:  
C<sub>28</sub> H<sub>33</sub> N<sub>8</sub> O<sub>6</sub>  
p (gss, s /p:40) Chrg 1  
R: 70000 Res .Pwr . @FWHM  
**Δm = 0.17ppm**

**22**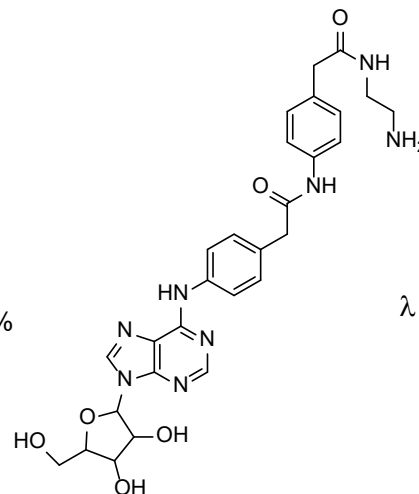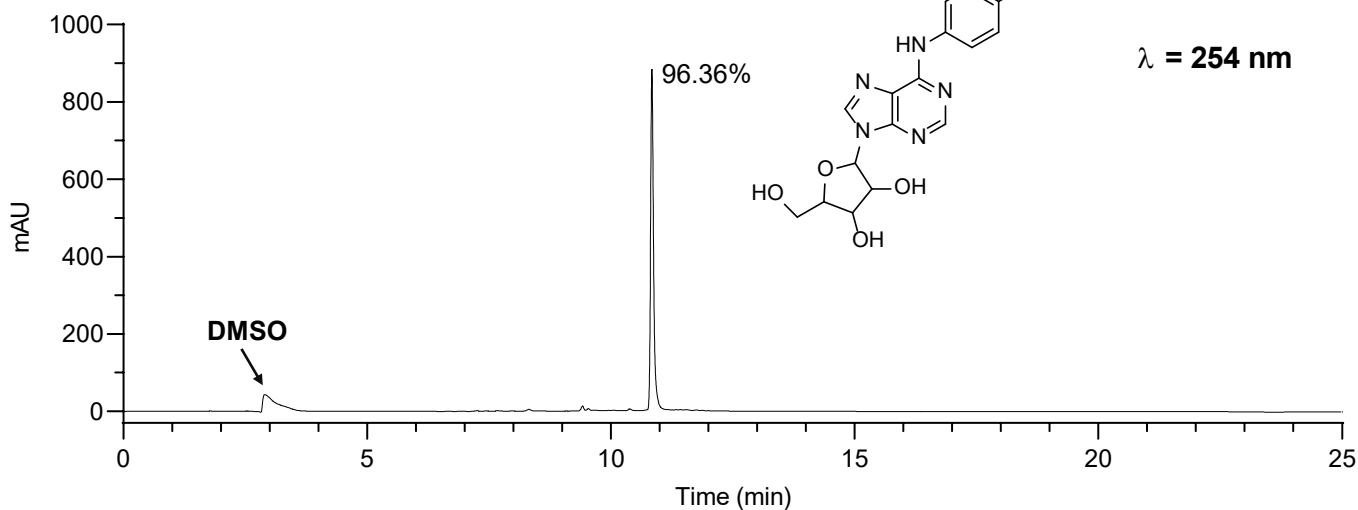

| Peak No. | Ret. Time (min) | Rel. Area (%) | Area (mAu*min) |
|----------|-----------------|---------------|----------------|
| 1        | 8.317           | 0.71          | 0.3723         |
| 2        | 9.417           | 1.28          | 0.6671         |
| 3        | 9.537           | 0.92          | 0.481          |
| 4        | 10.387          | 0.37          | 0.1918         |
| 5        | 10.843          | 95.72         | 49.9898        |
| 6        | 11.43           | 0.56          | 0.2926         |
| 7        | 11.777          | 0.44          | 0.2292         |
| Total    |                 | 100.00        | 52.2238        |

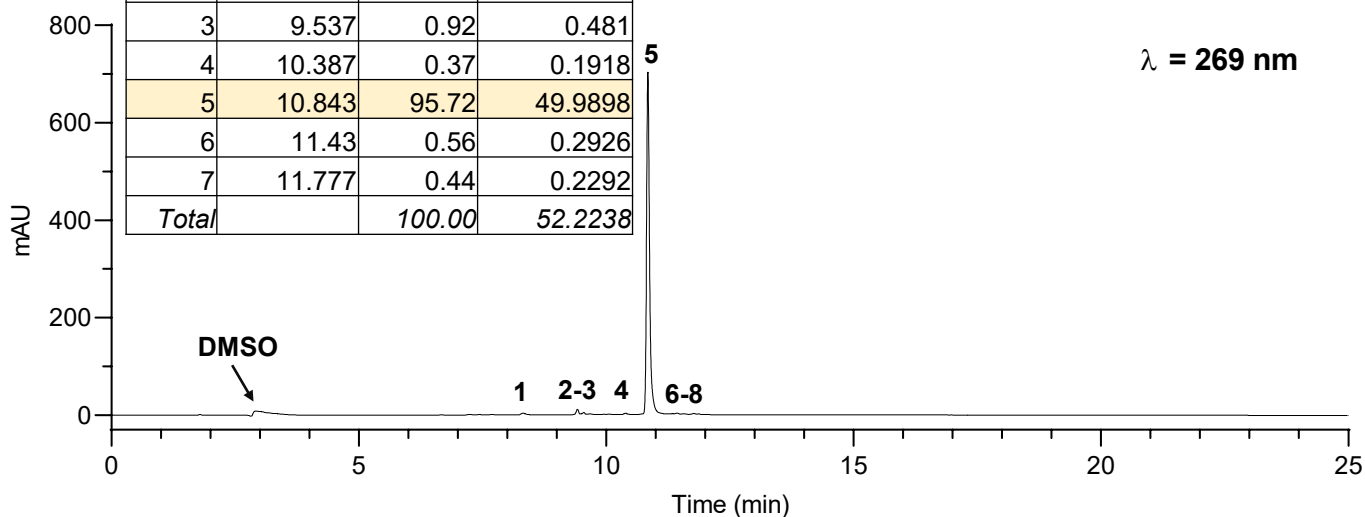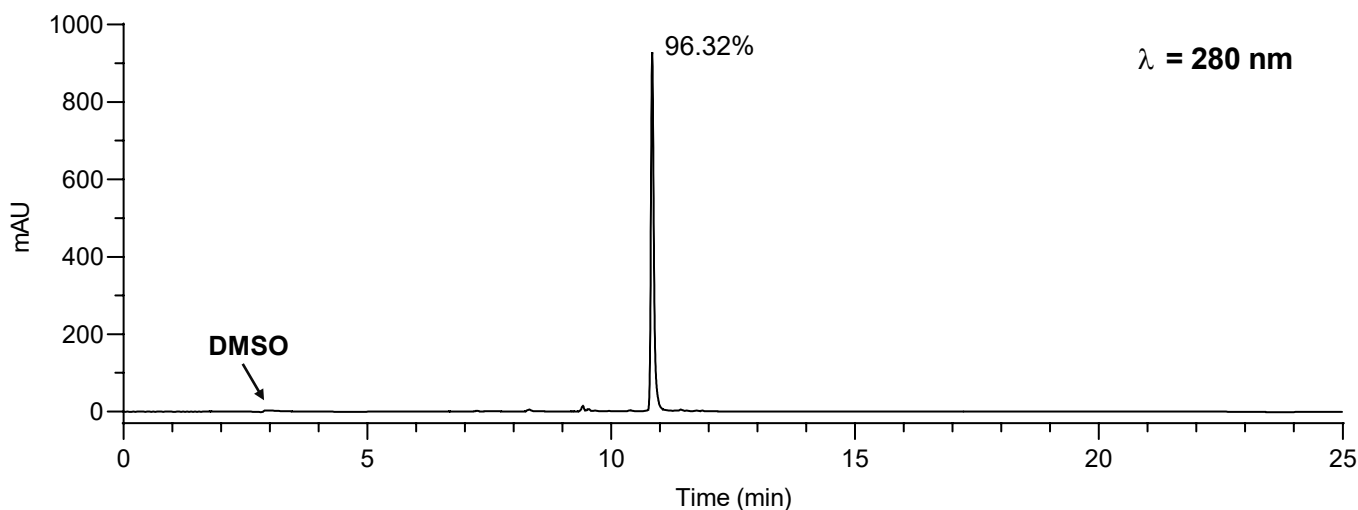

23

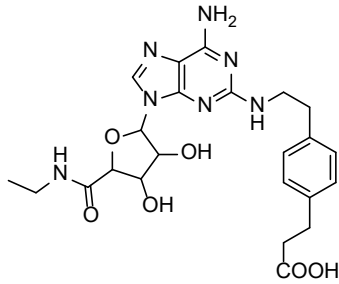

23 #1-30 RT: 0.02-0.41 AV: 30 NL: 2.96E7 T: FTMS  
 + p ESI Full ms [100.00-2000.00]

Full scan ESI(+)

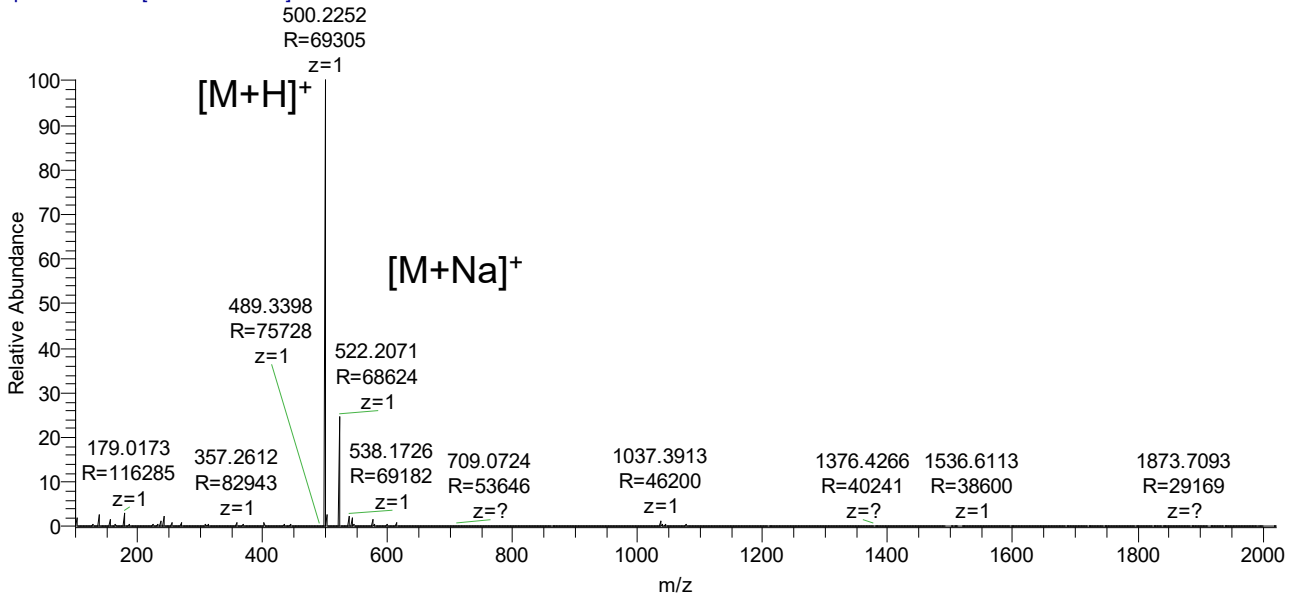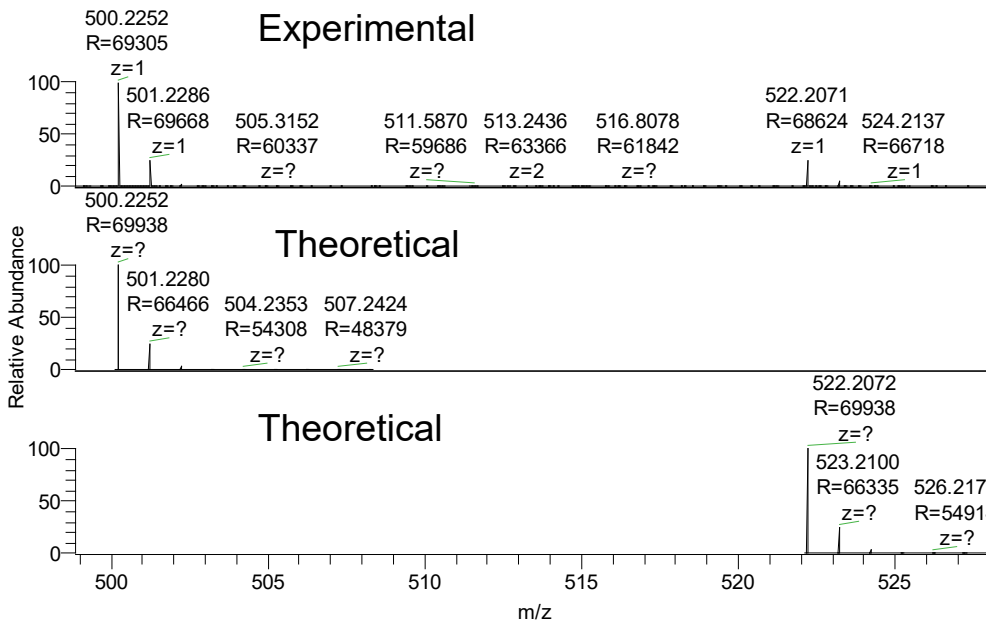

NL: 2.96E7  
 23#1-30 RT: 0.02-0.41 AV: 30 T: FTMS + p ESI Full ms [100.00-2000.00]

NL: 1.75E4 **delta m = 0.00 ppm**

C<sub>23</sub> H<sub>29</sub> N<sub>7</sub> O<sub>6</sub> +H:  
 C<sub>23</sub> H<sub>30</sub> N<sub>7</sub> O<sub>6</sub>  
 p (gss, s /p:40) Chrg 1  
 R: 70000 Res. Pwr. @FWHM

NL: 1.75E4 **delta m = 0.19 ppm**

C<sub>23</sub> H<sub>29</sub> N<sub>7</sub> O<sub>6</sub> +Na:  
 C<sub>23</sub> H<sub>29</sub> N<sub>7</sub> O<sub>6</sub> Na<sub>1</sub>  
 p (gss, s /p:40) Chrg 1  
 R: 70000 Res. Pwr. @FWHM



**23**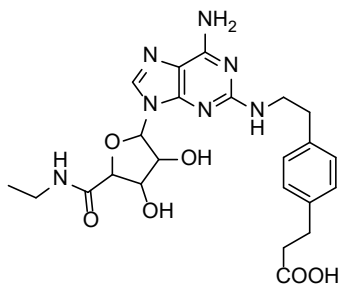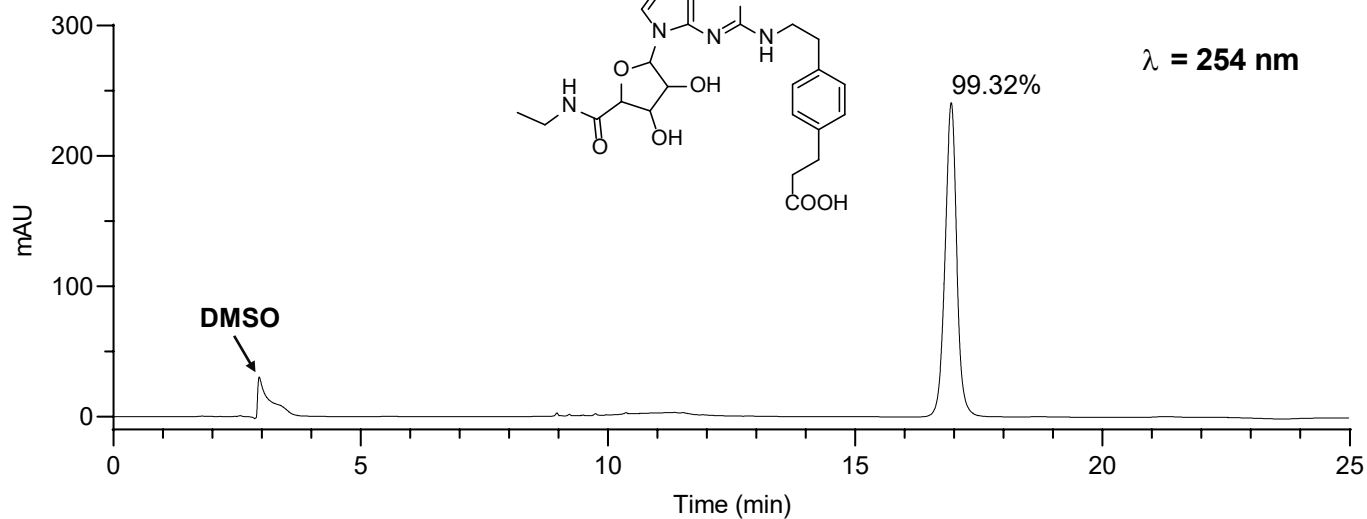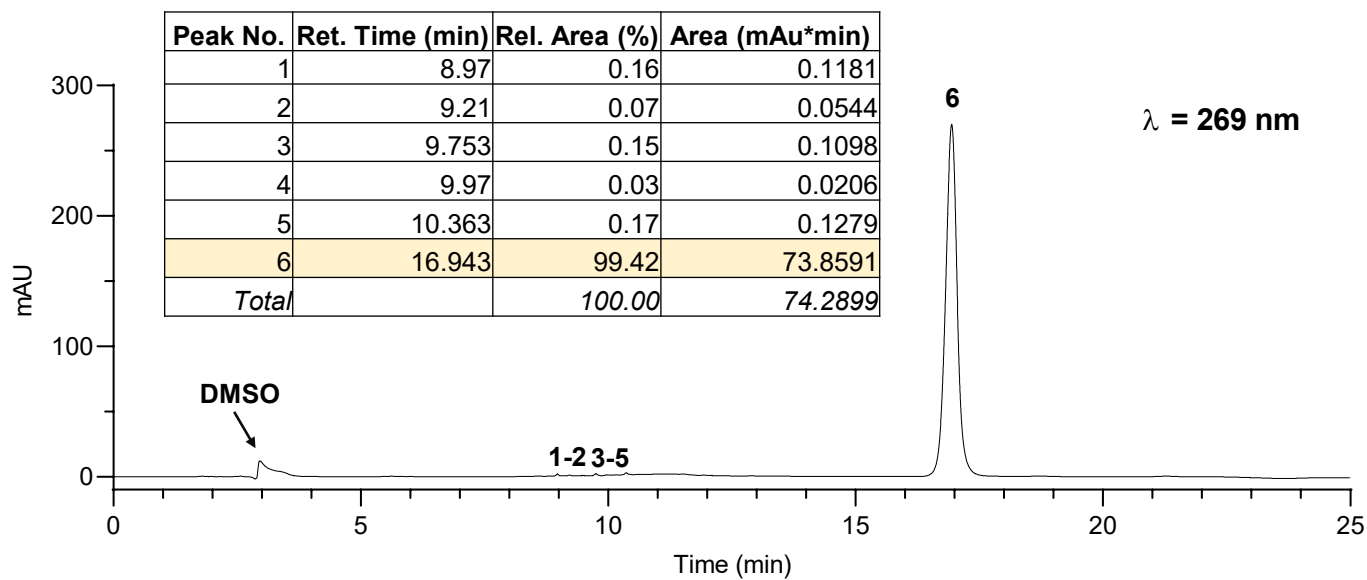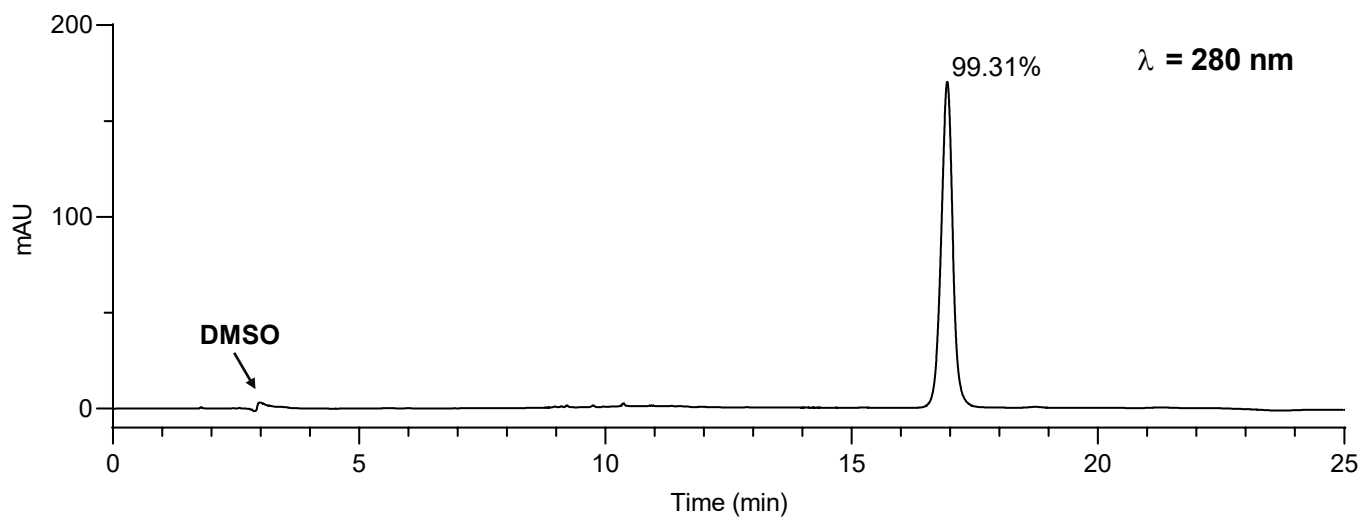

24

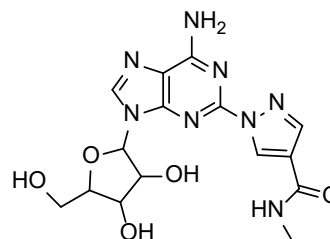

24 #1-30 RT: 0.02-0.42 AV: 30 NL: 1.17E7 T: FTMS  
+ p ESI Full ms [100.00-2000.00]

Full scan ESI(+)

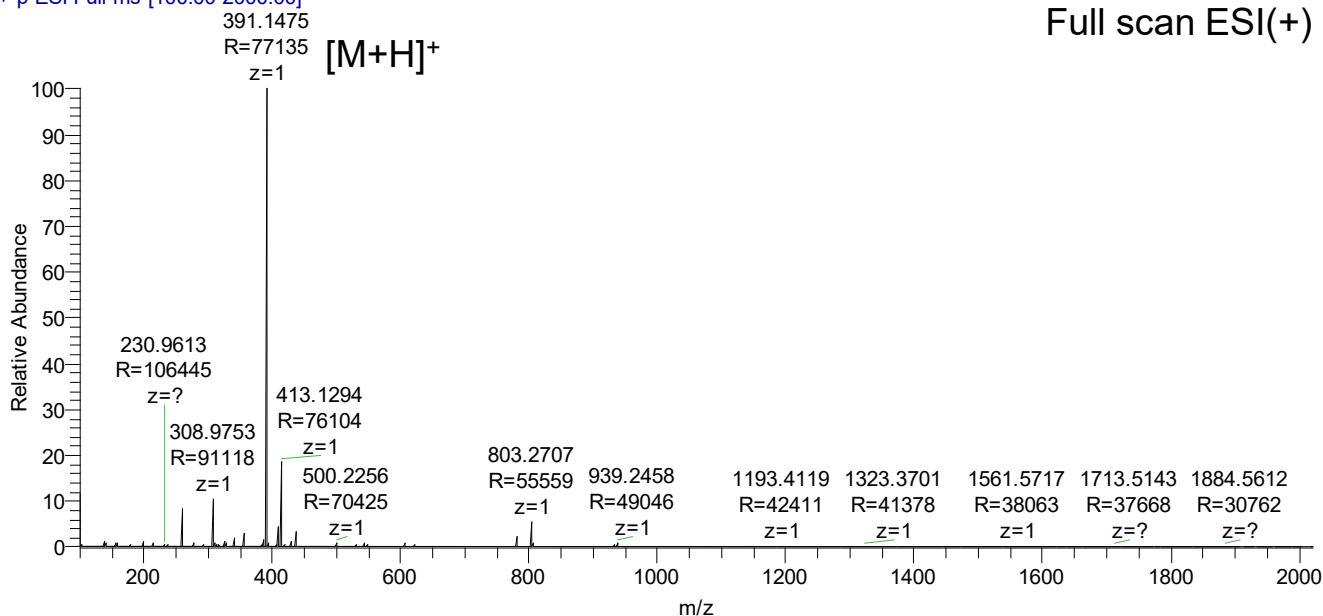

Experimental

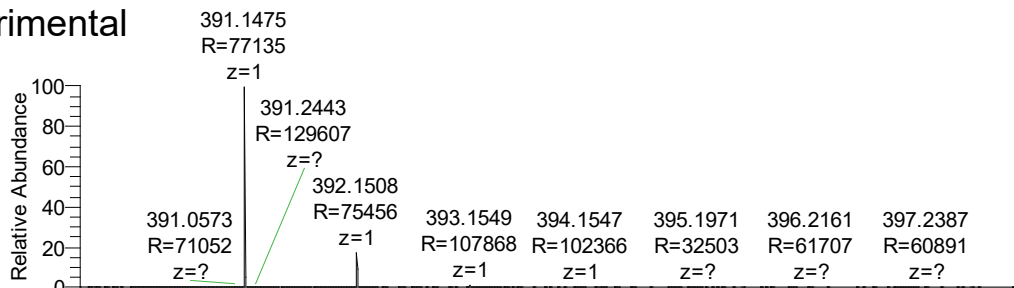

NL:  
1.17E7  
24#1-30 RT:  
0.02-0.42 AV: 30 T: FTMS +  
p ESI Full ms  
[100.00-2000.00]

Theoretical

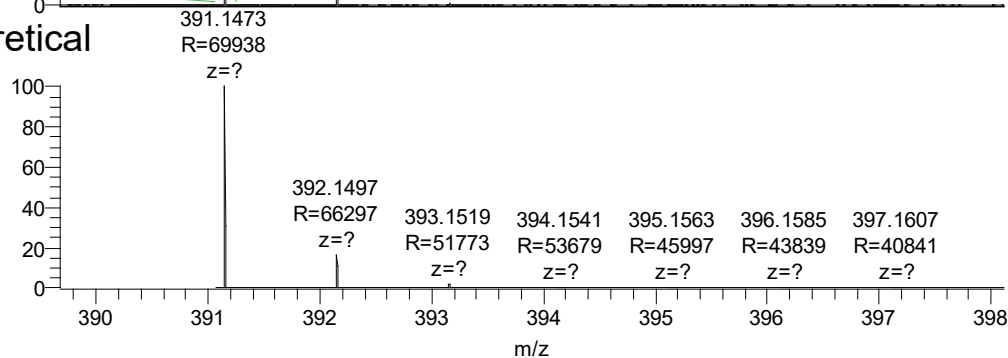

NL:  
1.91E4  
C<sub>15</sub>H<sub>18</sub>N<sub>8</sub>O<sub>5</sub> + H:  
C<sub>15</sub>H<sub>18</sub>N<sub>8</sub>O<sub>5</sub>  
p (gss, s /p:40) Chrg 1  
R: 70000 Res .Pwr. @FWHM

 $\Delta m = 0.51 \text{ ppm}$

**24** $\lambda = 254 \text{ nm}$ 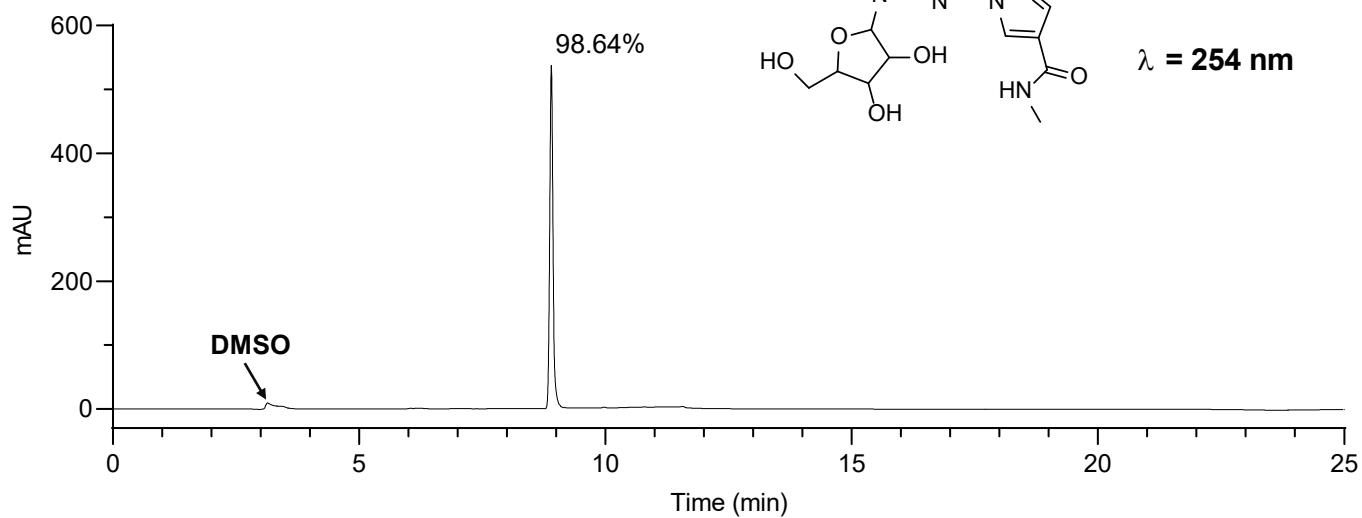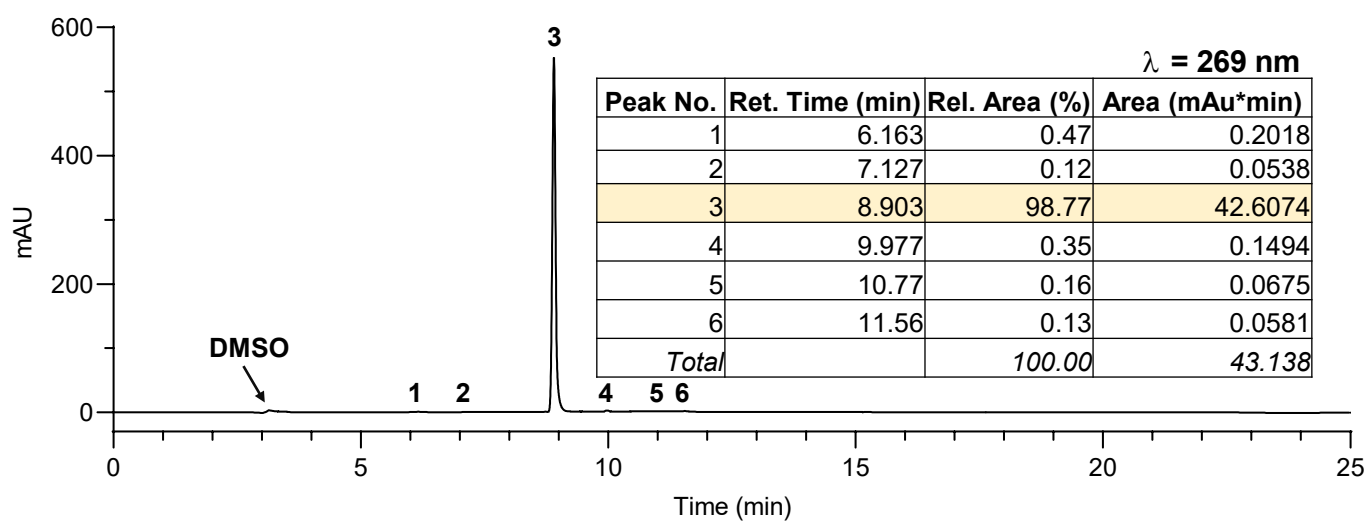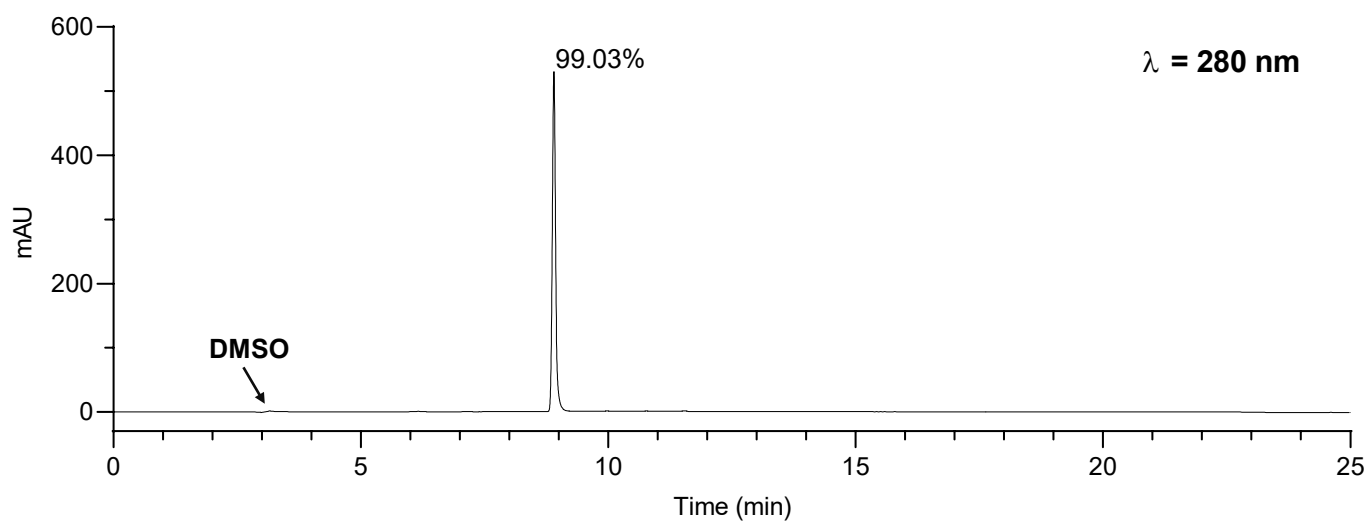

25

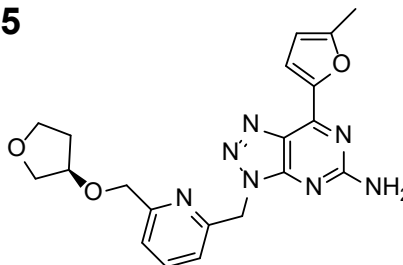

25 #1-30 RT: 0.02-0.41 AV: 30 NL: 3.04E7 T: FTMS  
+ p ESI Full ms [100.00-2000.00]

Full scan ESI(+)

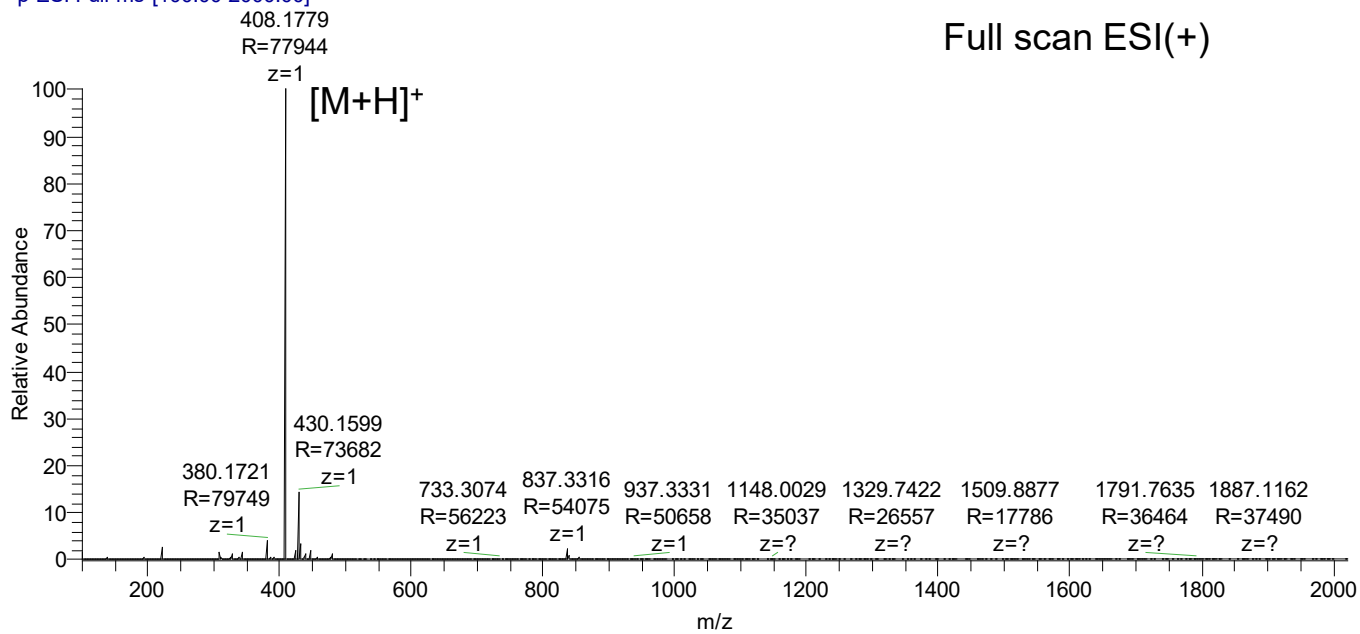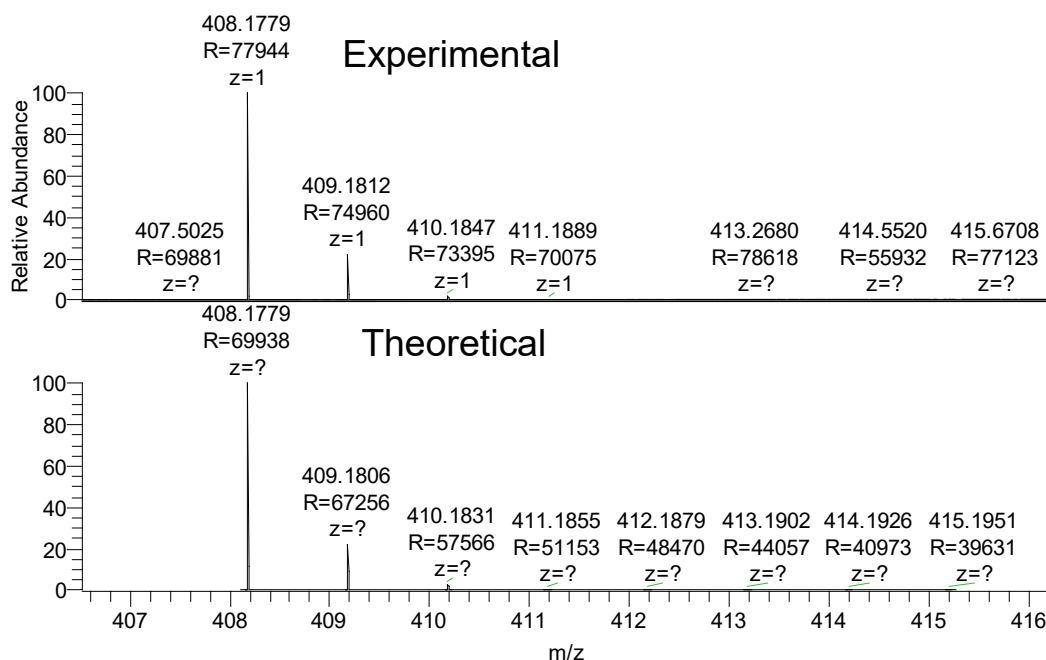

NL:  
3.04E7  
25#1-30 RT:  
0.02-0.41 AV: 30 T: FTMS +  
p ESI Full ms  
[100.00-2000.00]

NL:  
1.83E4  
C<sub>20</sub> H<sub>21</sub> N<sub>7</sub> O<sub>3</sub> +H:  
C<sub>20</sub> H<sub>22</sub> N<sub>7</sub> O<sub>3</sub>  
p (gss, s /p:40) Chrg 1  
R: 70000 Res .Pwr . @FWHM

**25**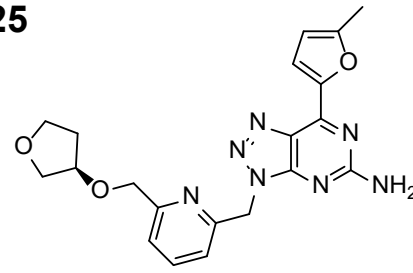 $\lambda = 230 \text{ nm}$ 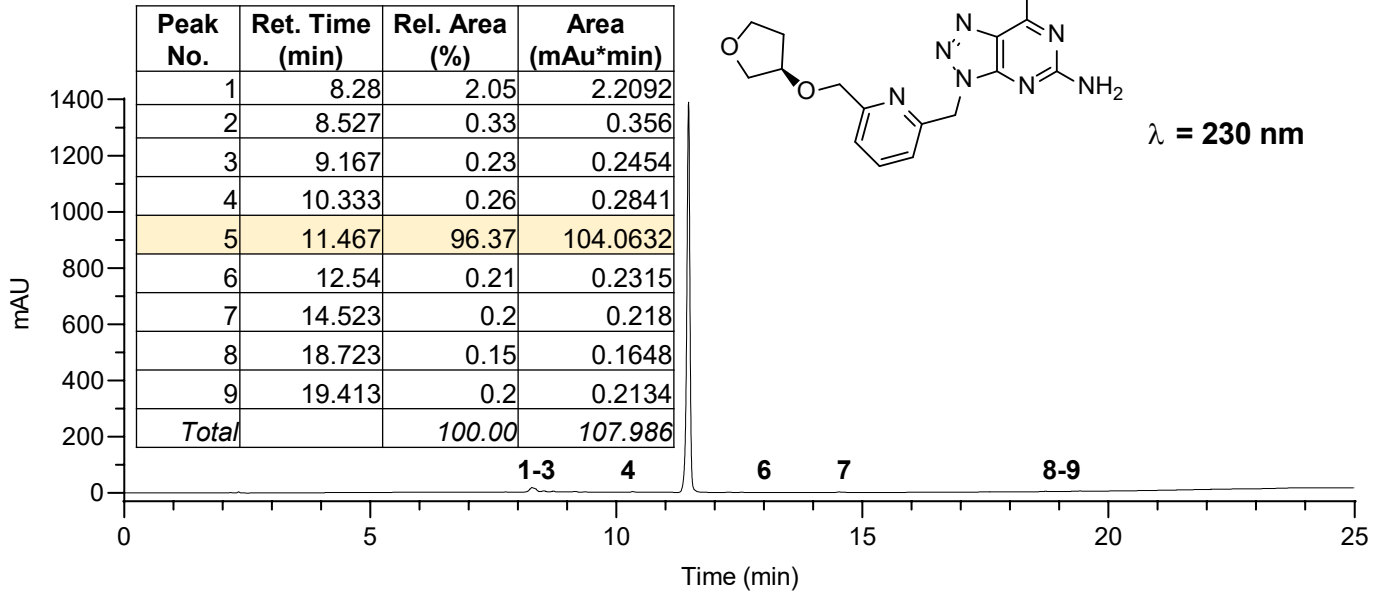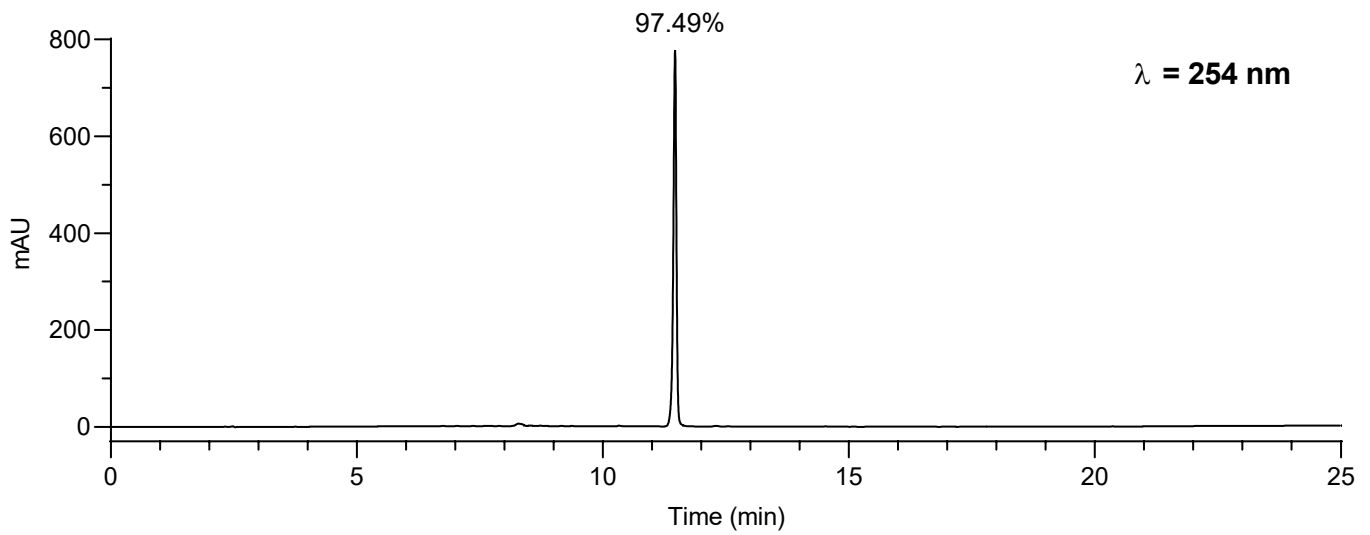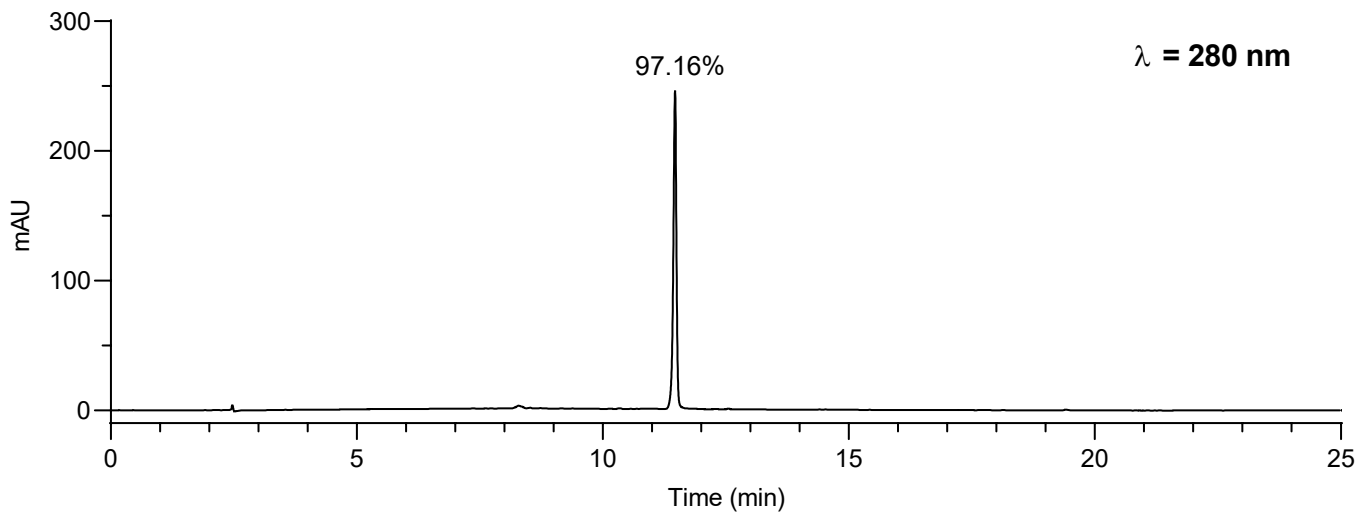

26

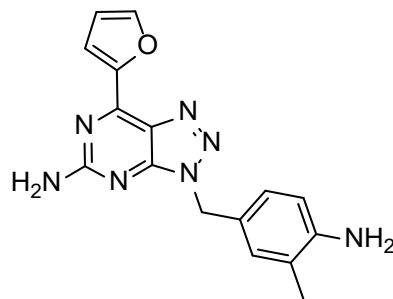

26 #1-30 RT: 0.02-0.41 AV: 30 NL: 3.75E7 T: FTMS  
+ p ESI Full ms [100.00-2000.00]

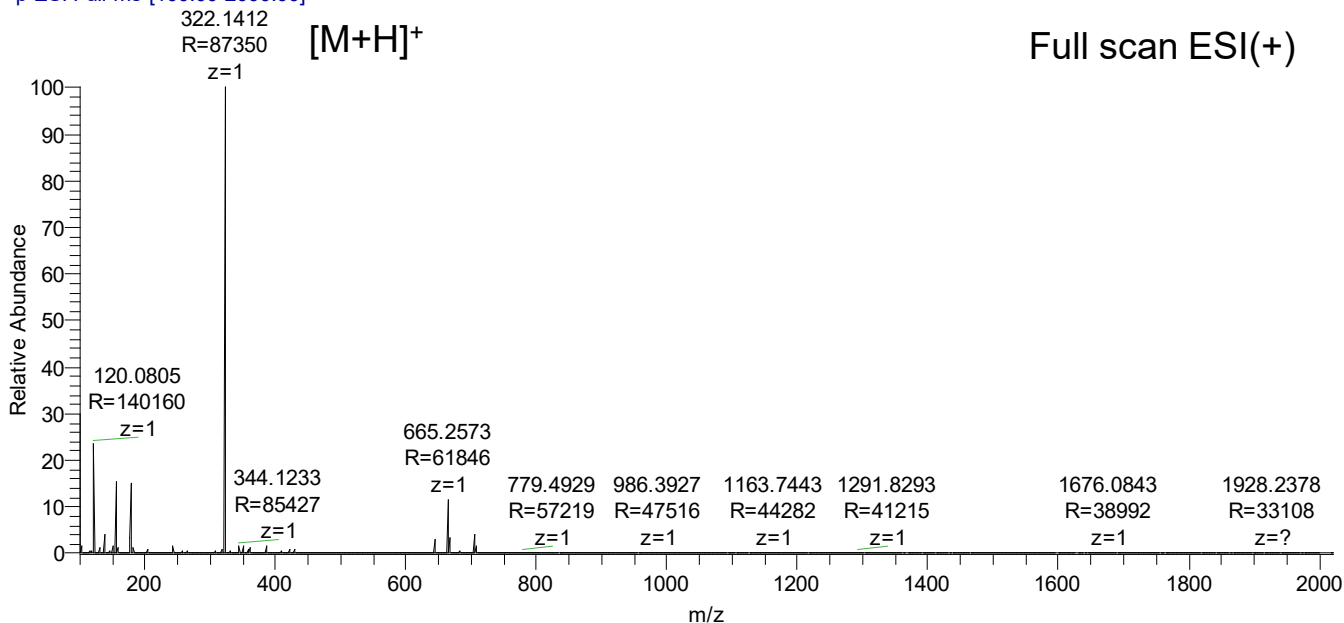

Experimental

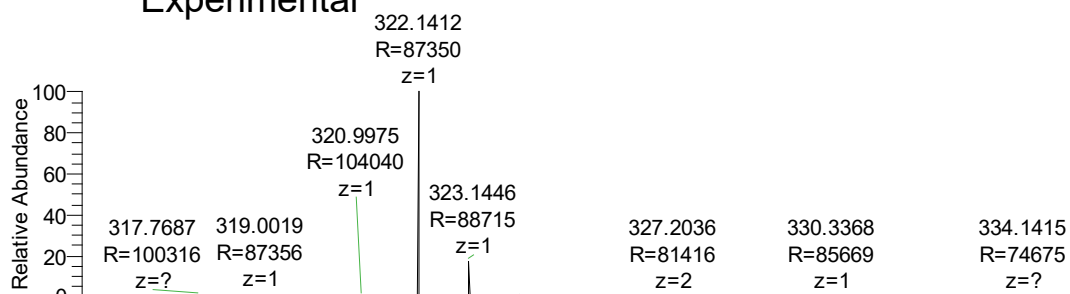

NL:  
3.75E7  
26#1-30 RT:  
0.02-0.41 AV: 30 T: FTMS +  
p ESI Full ms  
[100.00-2000.00]

Theoretical

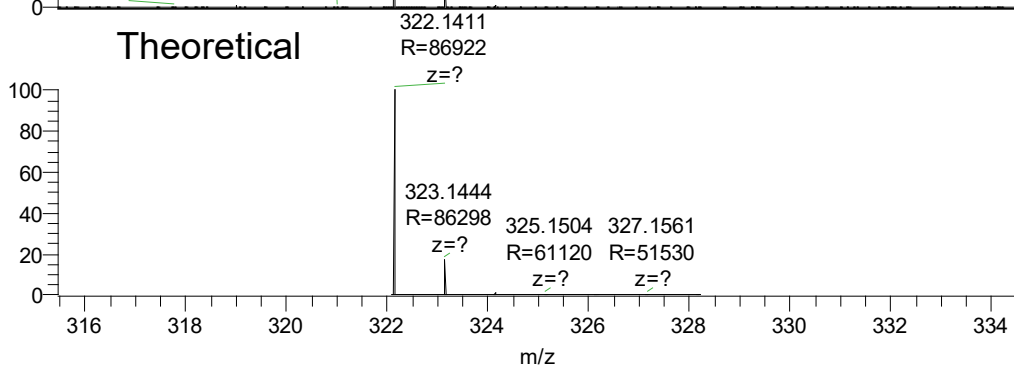

NL:  
1.92E4  
C<sub>6</sub>H<sub>6</sub>N<sub>7</sub>O +H:  
C<sub>6</sub>H<sub>6</sub>N<sub>7</sub>O<sub>1</sub>  
p (gss, s /p:40) Chrg 1  
R: 87000 Res .Pwr. @FWHM  
**Δm= 0.31ppm**

26

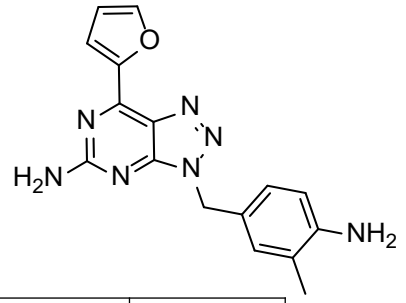

$\lambda = 230 \text{ nm}$

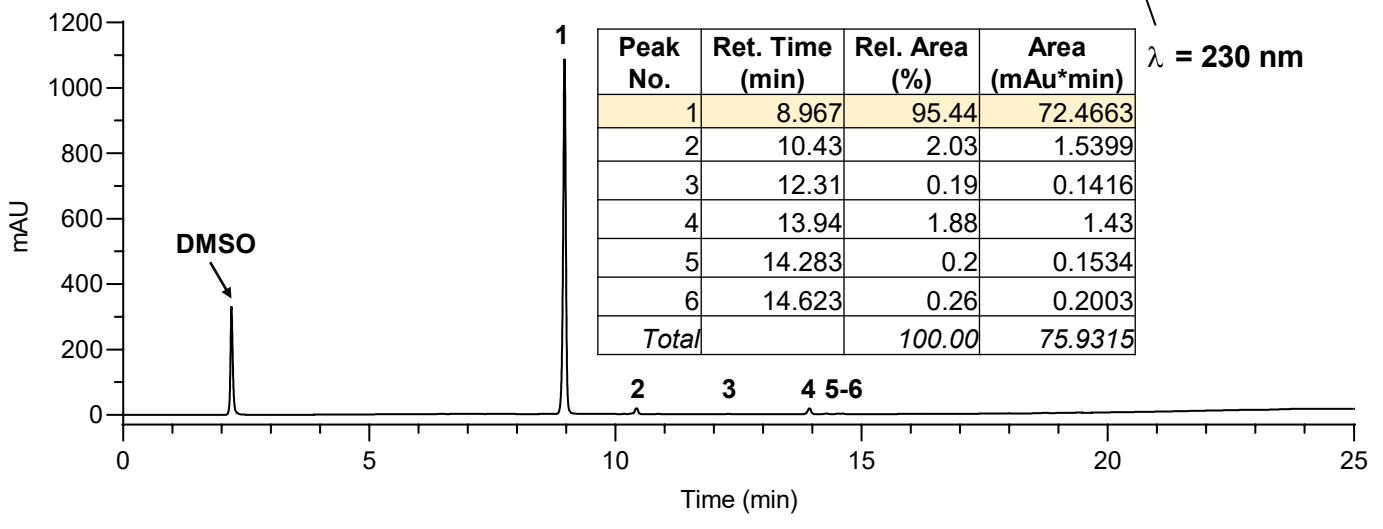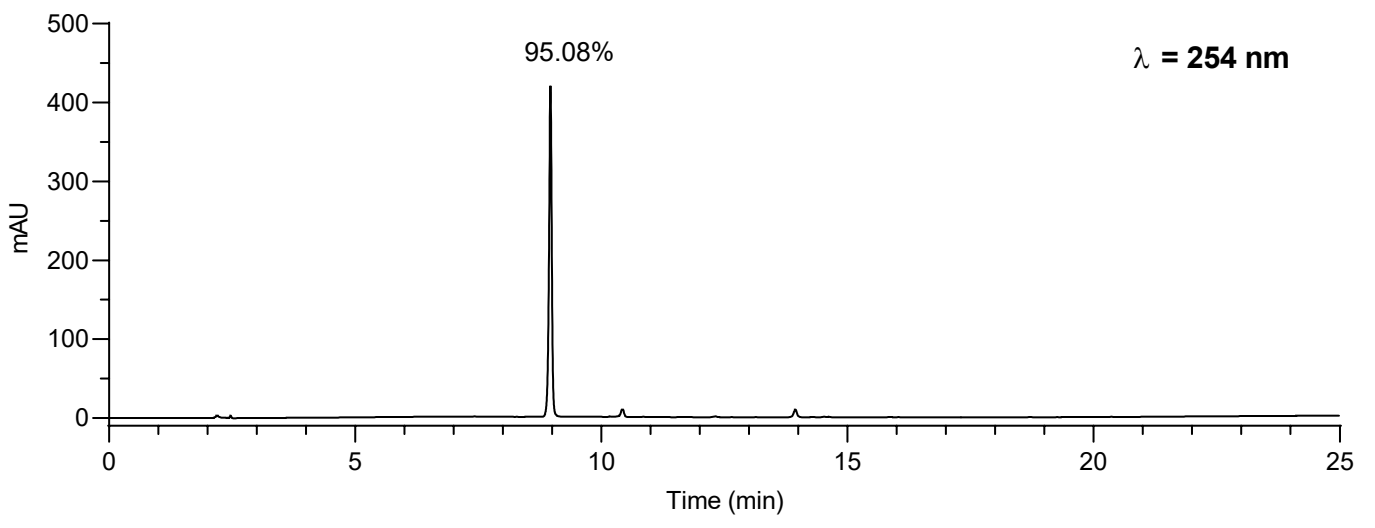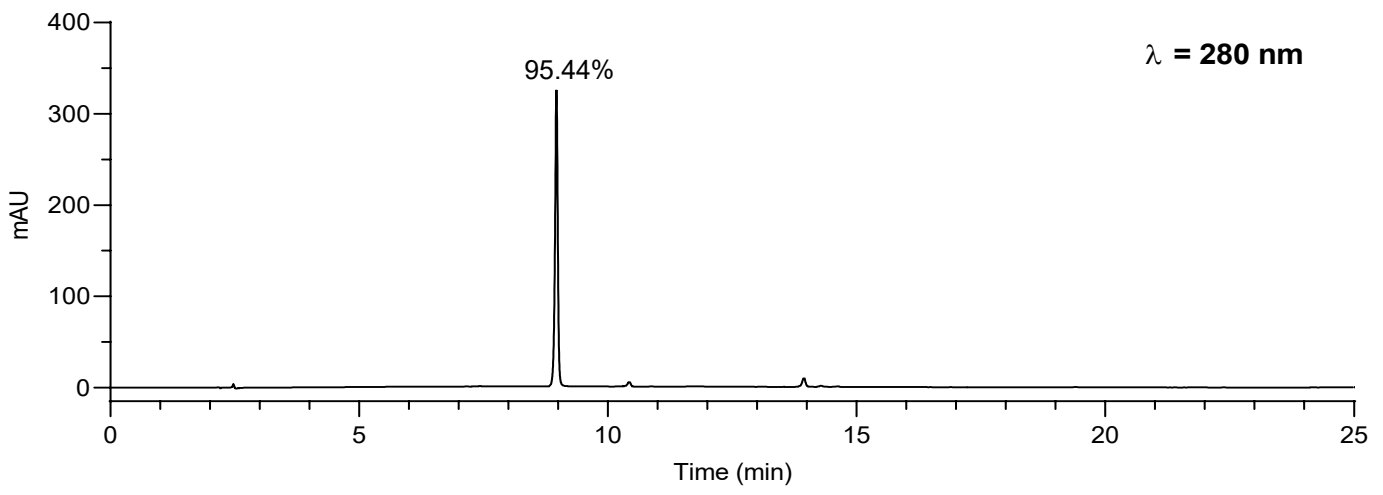

27

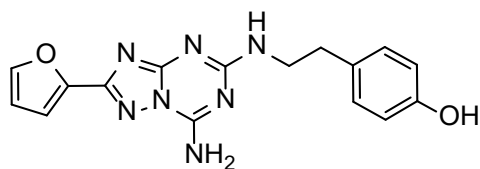

27 #2-29 RT: 0.03-0.40 AV: 28 NL: 1.74E7 T: FTMS  
+ p ESI Full ms [100.00-2000.00]

Full scan ESI(+)

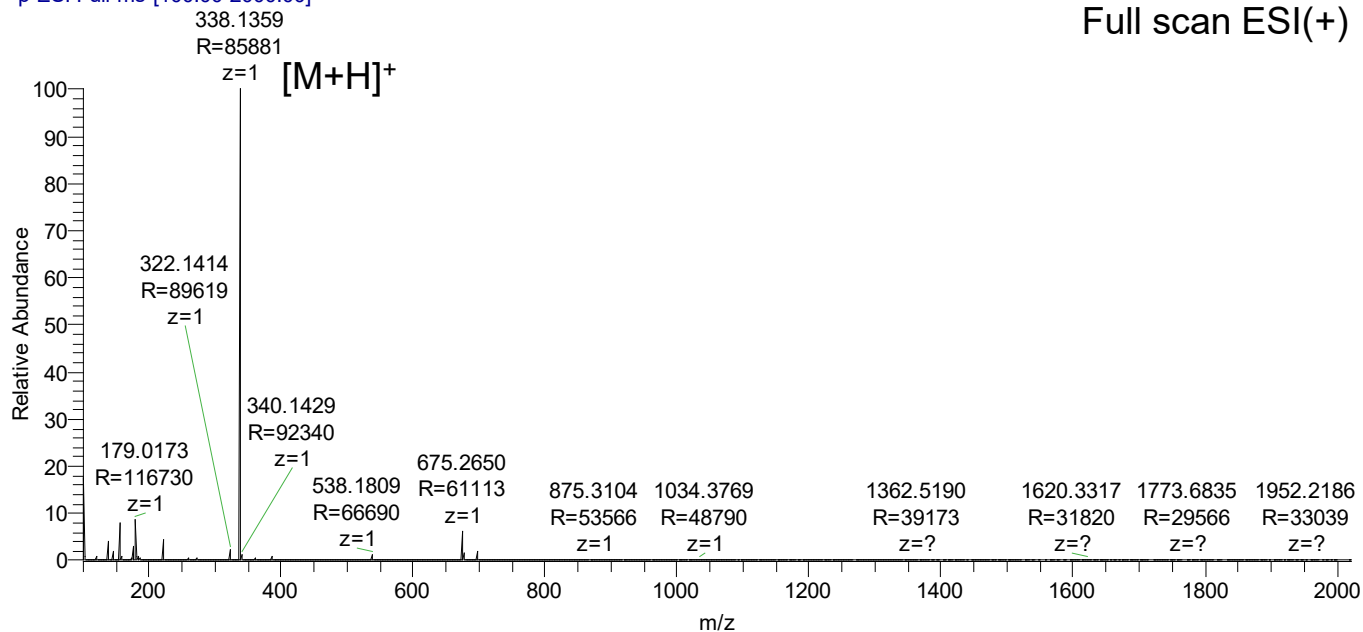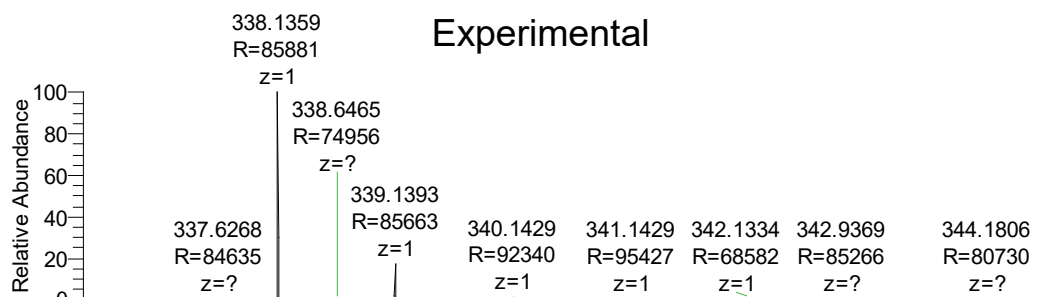

NL:  
1.74E7  
27#2-29 RT:  
0.03-0.40 AV: 28 T: FTMS +  
p ESI Full ms  
[100.00-2000.00]

NL:  
1.91E4  
C<sub>16</sub>H<sub>15</sub>N<sub>7</sub>O<sub>2</sub> + H:  
C<sub>16</sub>H<sub>16</sub>N<sub>7</sub>O<sub>2</sub>  
p (gss, s /p:40) Chrg 1  
R: 87000 Res. Pwr. @FWHM  
**Δm= 0.30ppm**

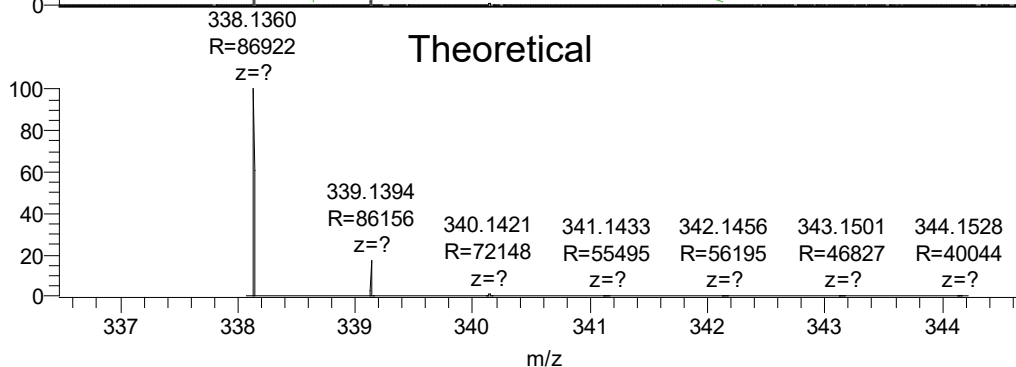



**27**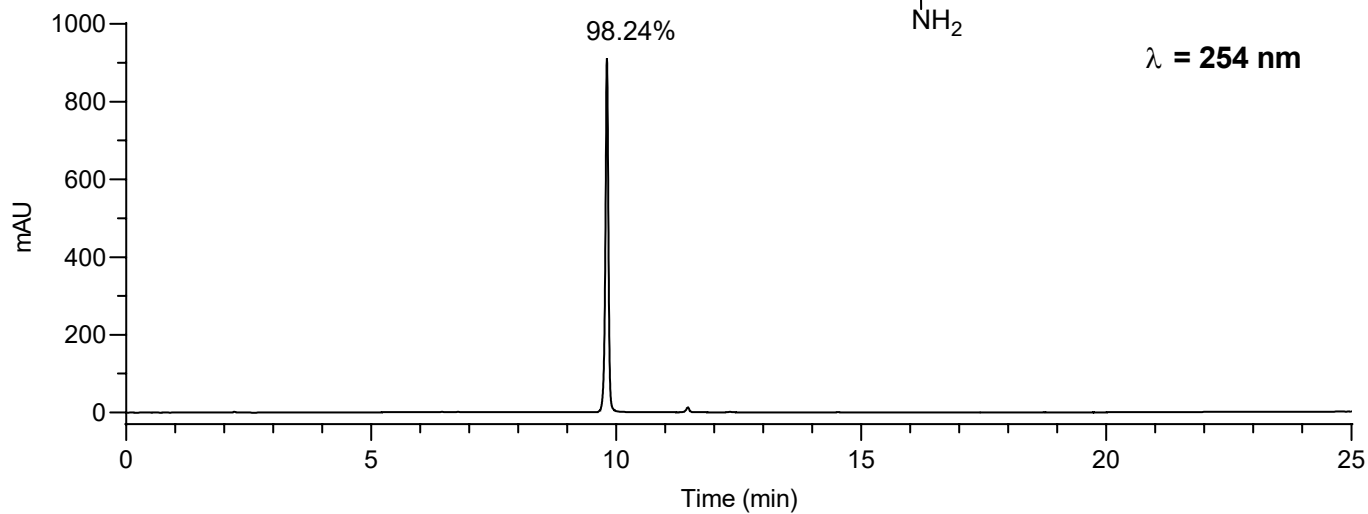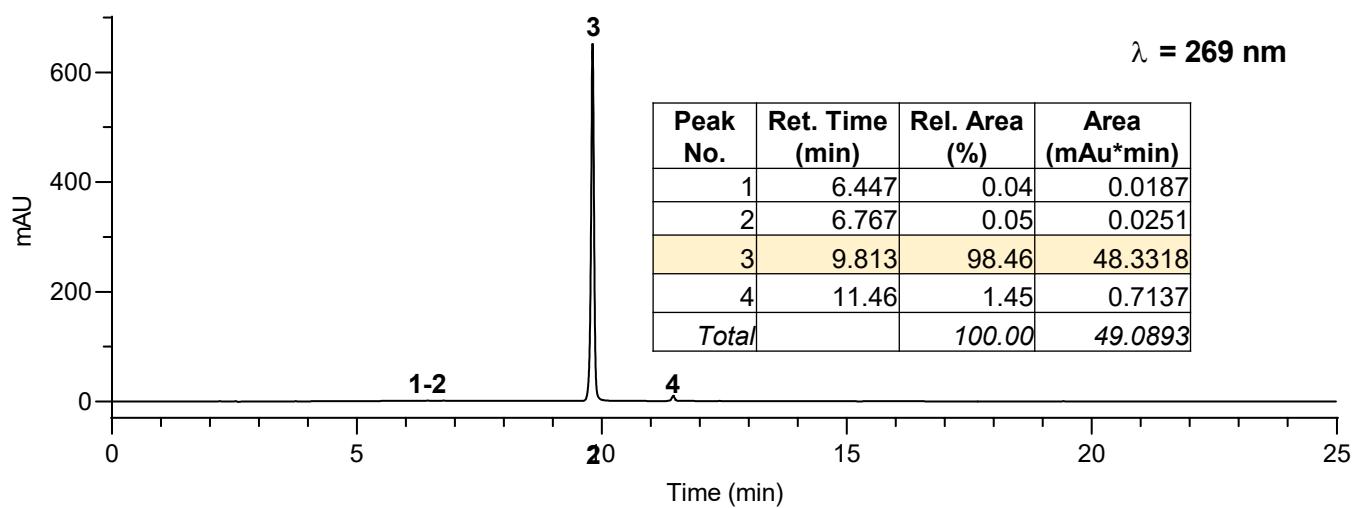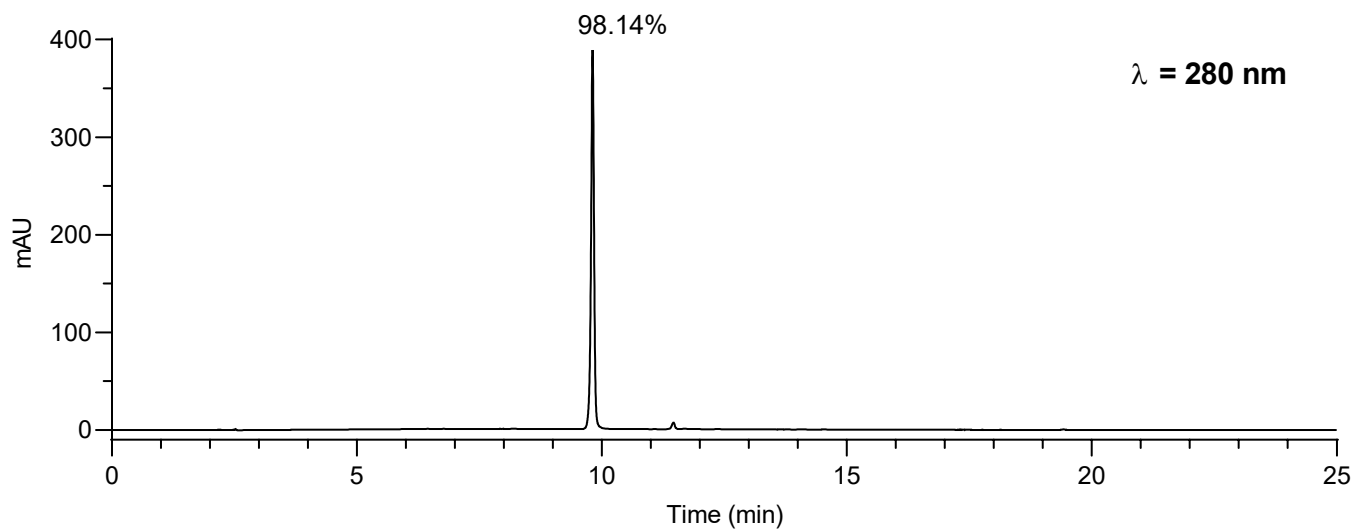

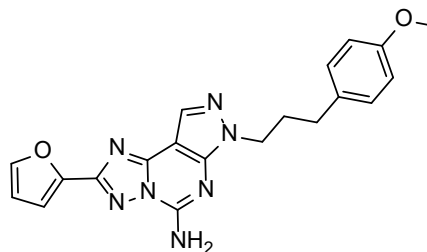

28 #1-30 RT: 0.02-0.41 AV: 30 NL: 2.35E7 T: FTMS

+ p ESI Full ms [100.00-2000.00]

Full scan ESI(+)

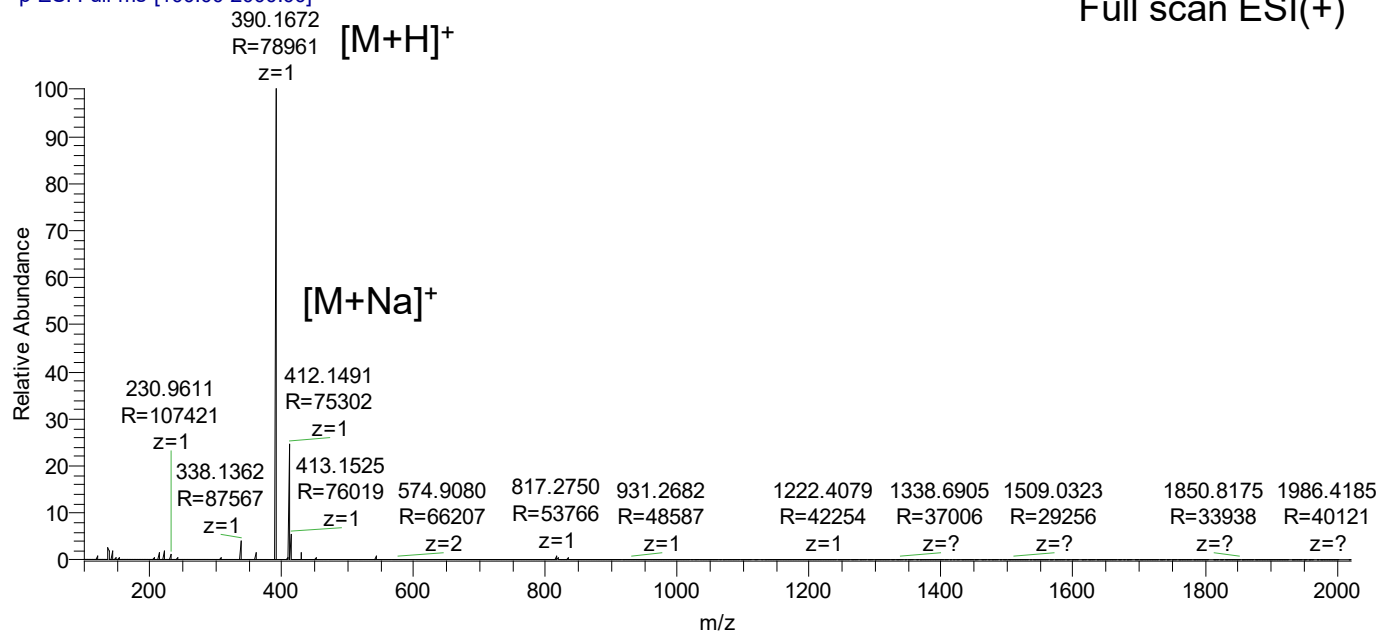

## Experimental

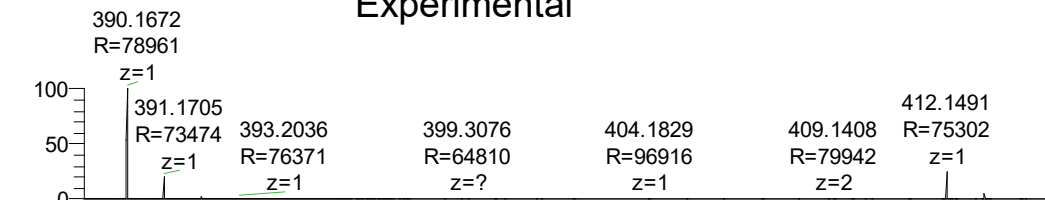

NL:

2.35E7

28#1-30 RT: 0.02-0.41 AV:  
30 T: FTMS + p ESI Full ms  
[100.00-2000.00]

## Theoretical

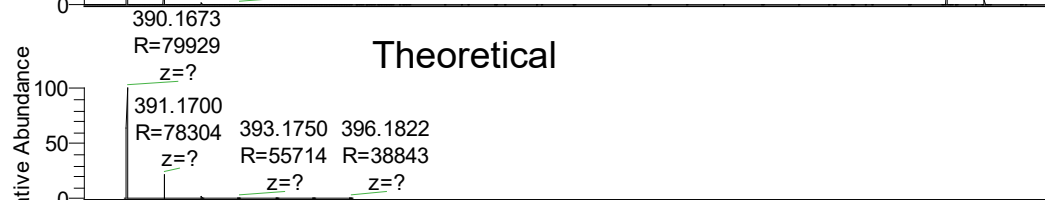NL:  $\Delta m = 0.26\text{ppm}$   
1.83E4 $C_{20}H_{19}N_7O_2 + H$ : $C_{20}H_{20}N_7O_2$ 

p (gss, s /p:40) Chrg 1

R: 80000 Res .Pwr. @FWHM

## Theoretical

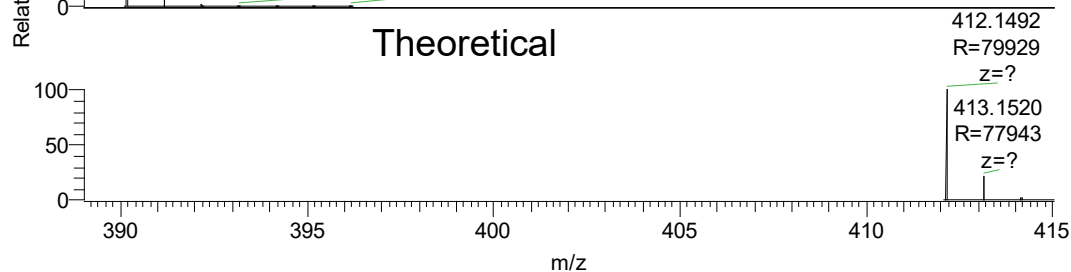NL:  $\Delta m = 0.24\text{ppm}$   
1.83E4 $C_{20}H_{19}N_7O_2 + Na$ : $C_{20}H_{19}N_7O_2 Na_1$ 

p (gss, s /p:40) Chrg 1

R: 80000 Res .Pwr. @FWHM

28

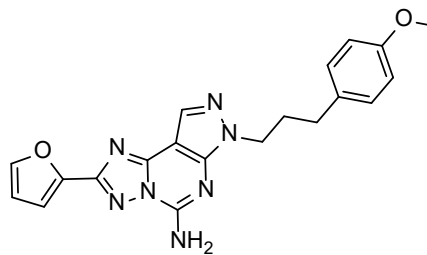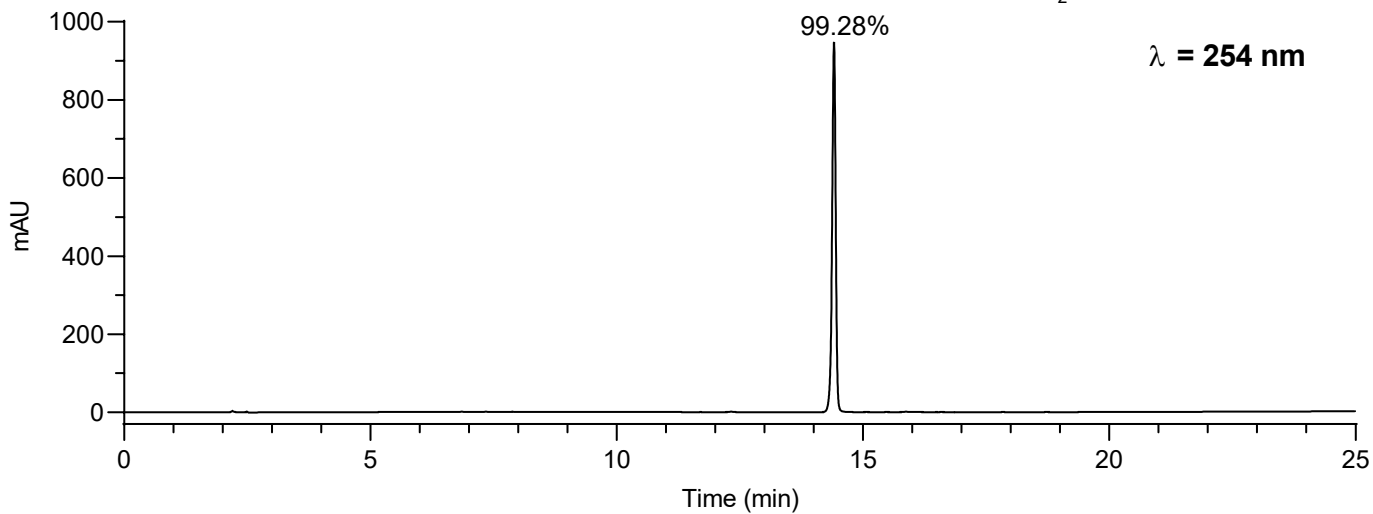

| Peak No. | Ret. Time (min) | Rel. Area (%) | Area (mAu*min) |
|----------|-----------------|---------------|----------------|
| 1        | 6.837           | 0.04          | 0.0302         |
| 2        | 14.413          | 99.49         | 85.2503        |
| 3        | 15.067          | 0.03          | 0.0241         |
| 4        | 15.48           | 0.05          | 0.0404         |
| 5        | 15.887          | 0.31          | 0.2655         |
| 6        | 17.847          | 0.05          | 0.0457         |
| 7        | 19.42           | 0.03          | 0.0272         |
| Total    |                 | 100.00        | 85.6834        |

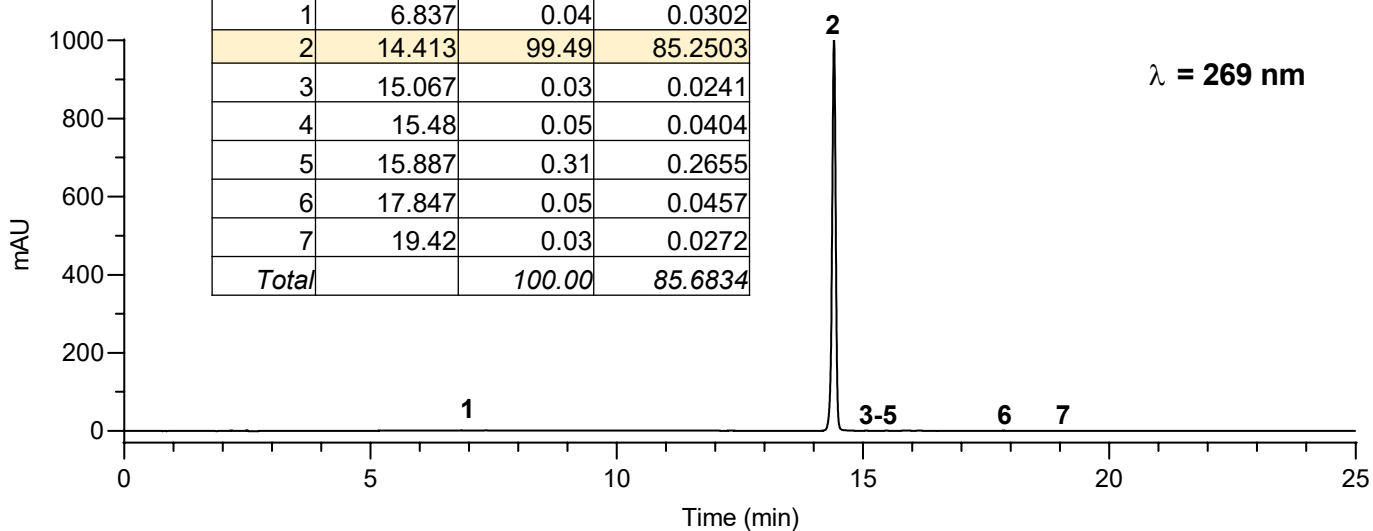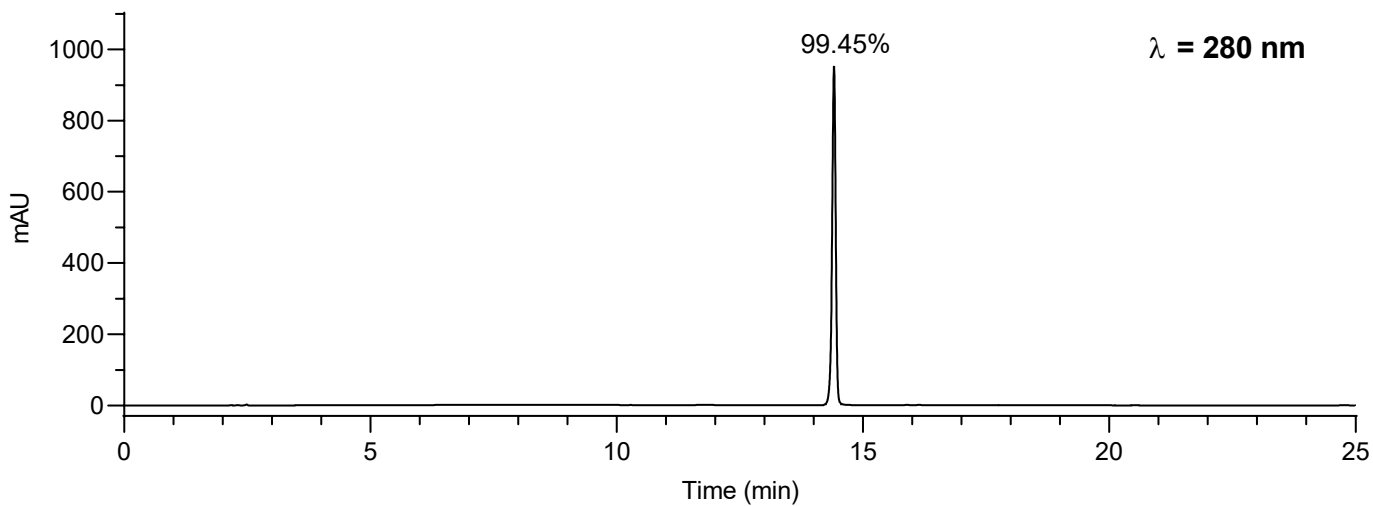

29

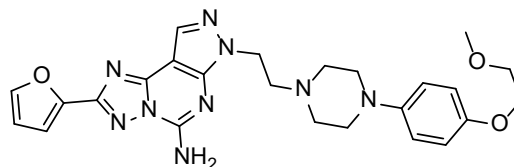

29 #1-30 RT: 0.02-0.41 AV: 30 NL: 1.18E8 T: FTMS  
+ p ESI Full ms [100.00-2000.00]

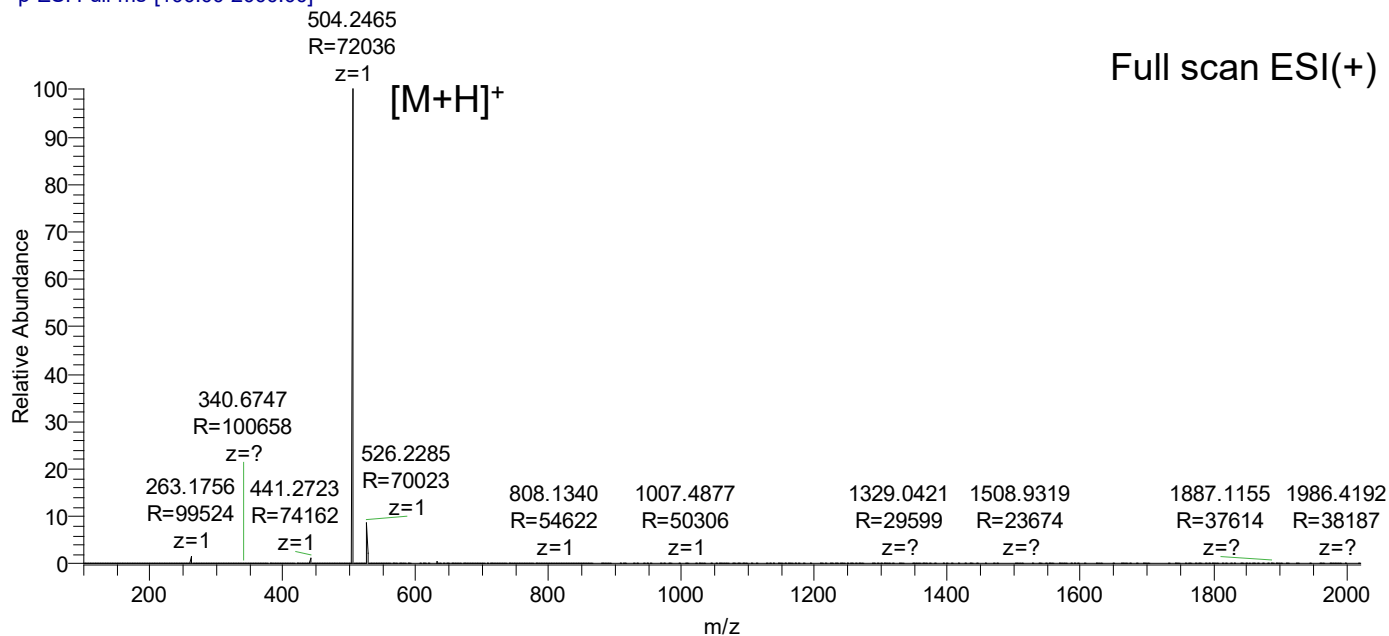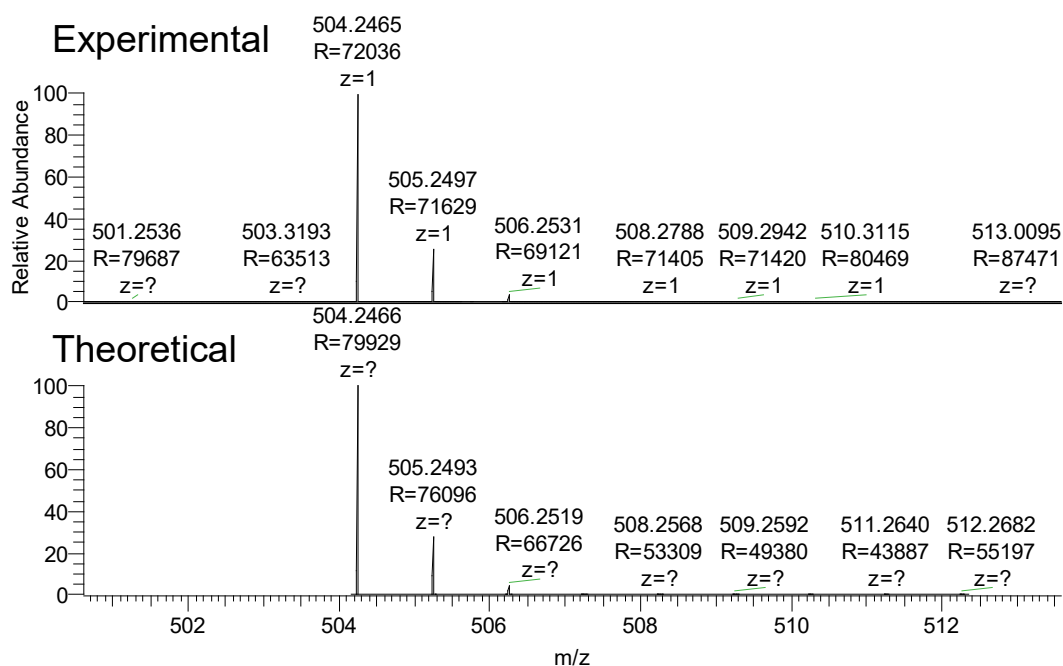

NL:  
1.18E8  
29#1-30 RT:  
0.02-0.41 AV: 30 T: FTMS +  
p ESI Full ms  
[100.00-2000.00]

NL:  
1.72E4  
C<sub>25</sub>H<sub>29</sub>N<sub>9</sub>O<sub>3</sub> +H:  
C<sub>25</sub>H<sub>30</sub>N<sub>9</sub>O<sub>3</sub>  
p (gss, s /p:40) Chrg 1  
R: 80000 Res .Pwr . @FWHM

$\Delta m = 0.20$  ppm

**29**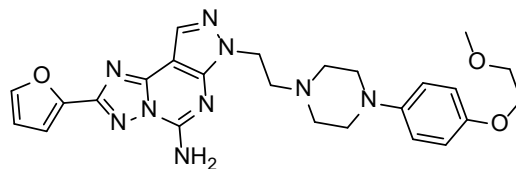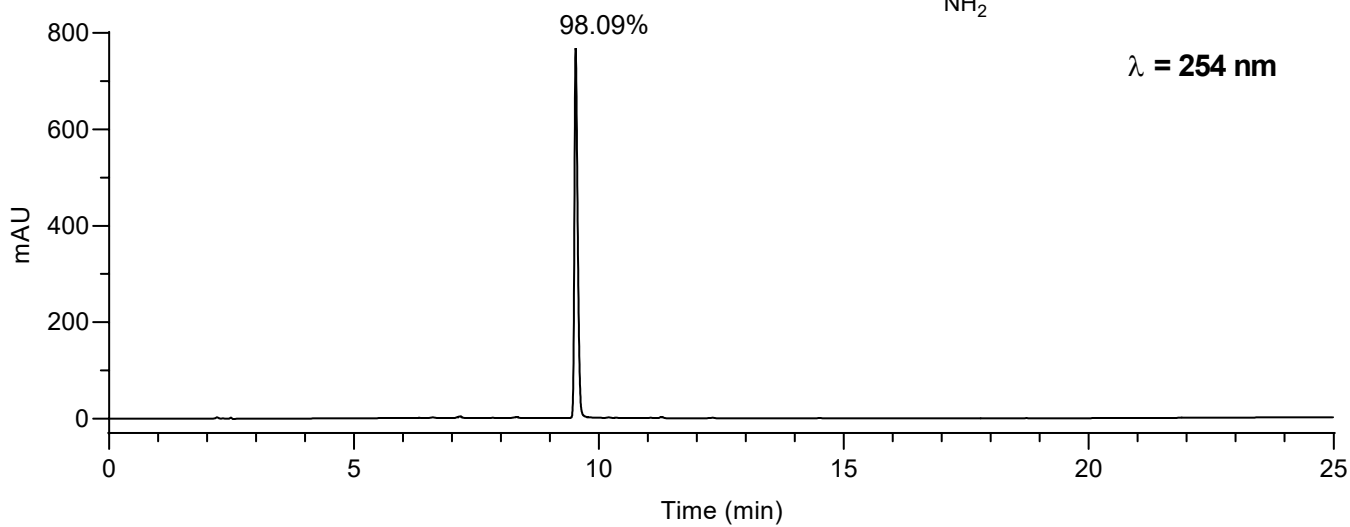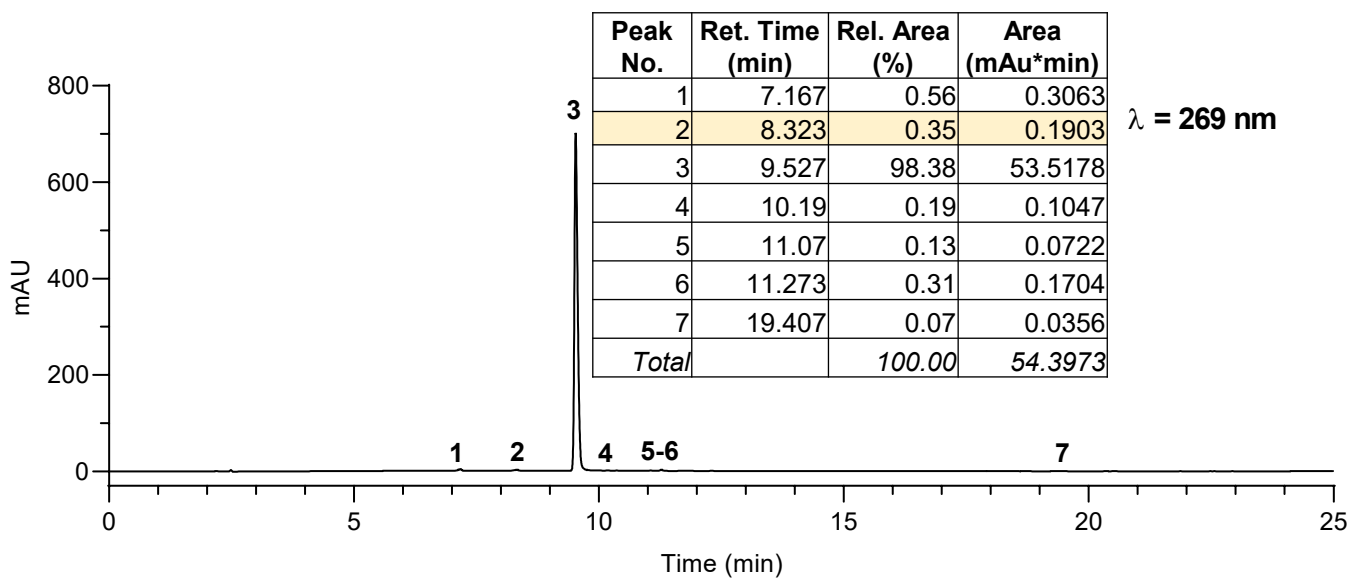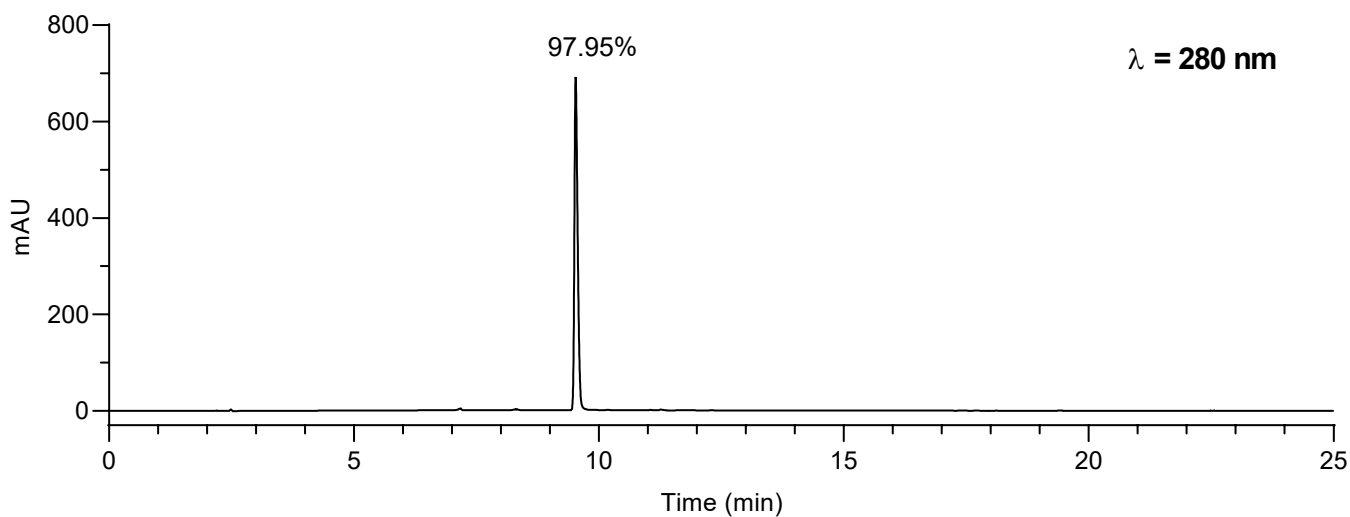

30

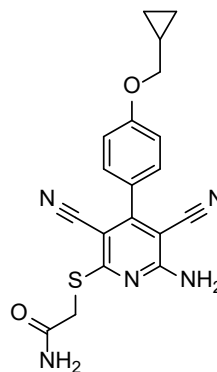

30 #2-28 RT: 0.03-0.39 AV: 27 NL: 3.03E7 T: FTMS  
+ p ESI Full ms [100.00-2000.00]

Full scan ESI(+)

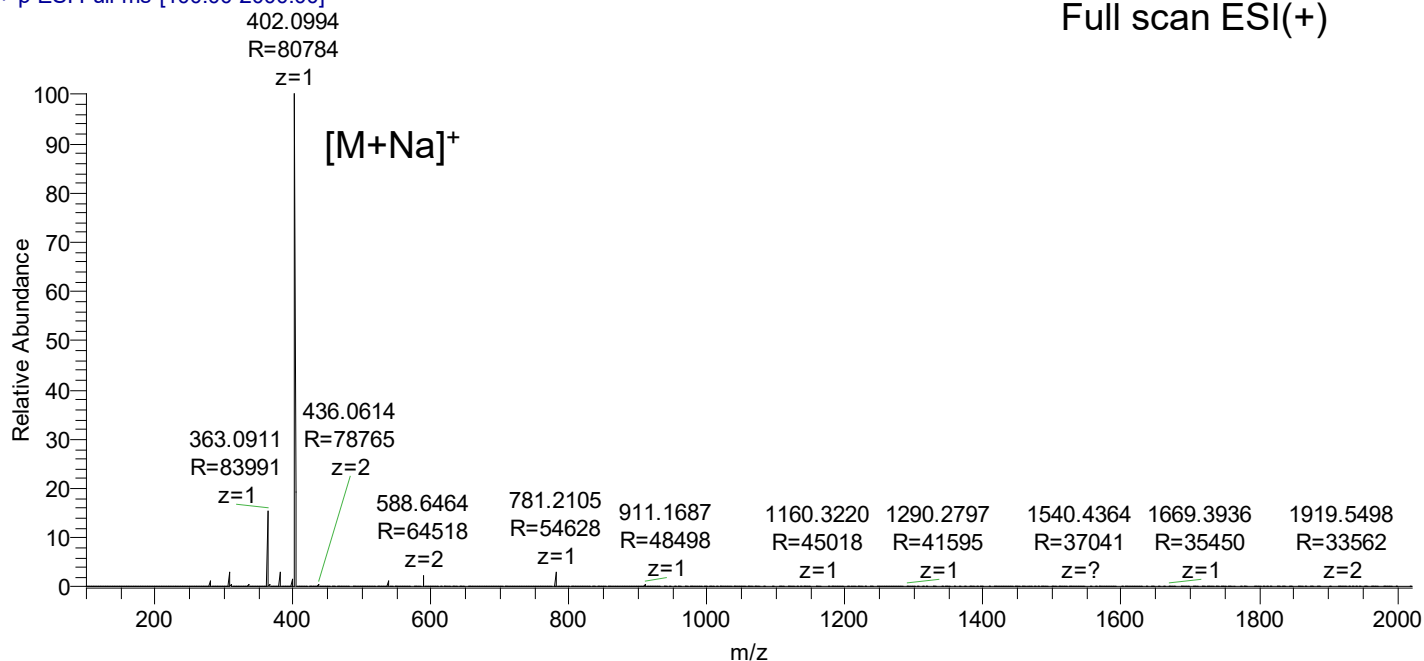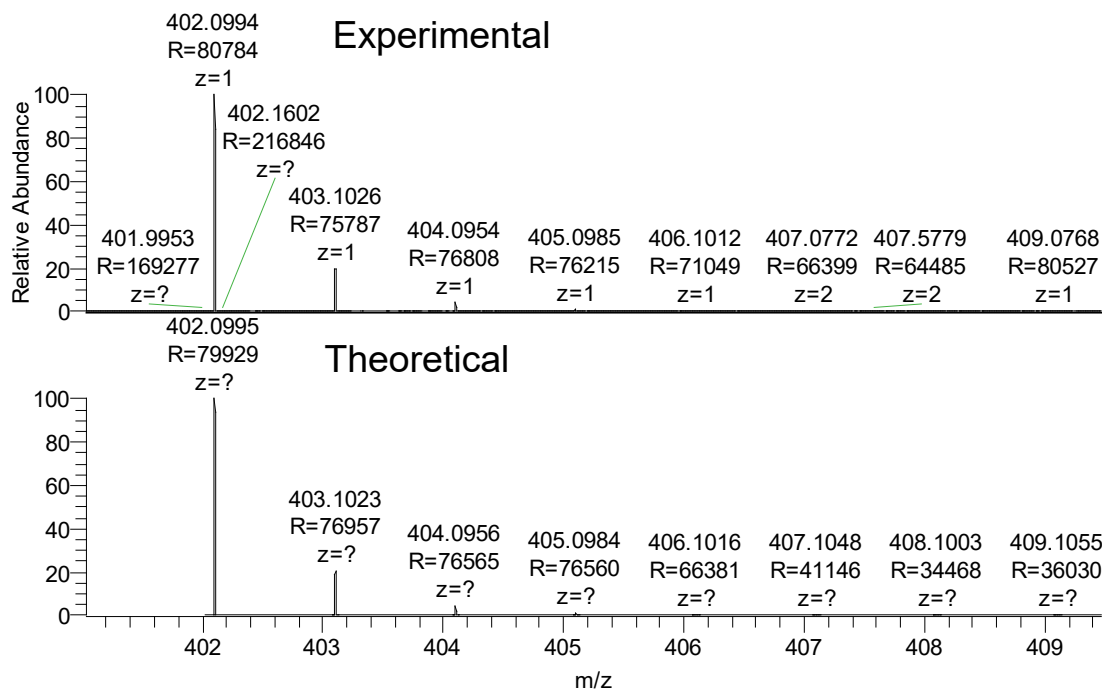

NL:  
3.03E7  
30#2-28 RT:  
0.03-0.39 AV: 27 T: FTMS +  
p ESI Full ms  
[100.00-2000.00]

NL:  
1.77E4  
C<sub>19</sub>H<sub>17</sub>N<sub>5</sub>O<sub>2</sub>S + Na:  
C<sub>19</sub>H<sub>17</sub>N<sub>5</sub>O<sub>2</sub>S<sub>1</sub>Na<sub>1</sub>  
p (gss, s /p:40) Chrg 1  
R: 80000 Res .Pwr . @FWHM

Δm= 0.25 ppm

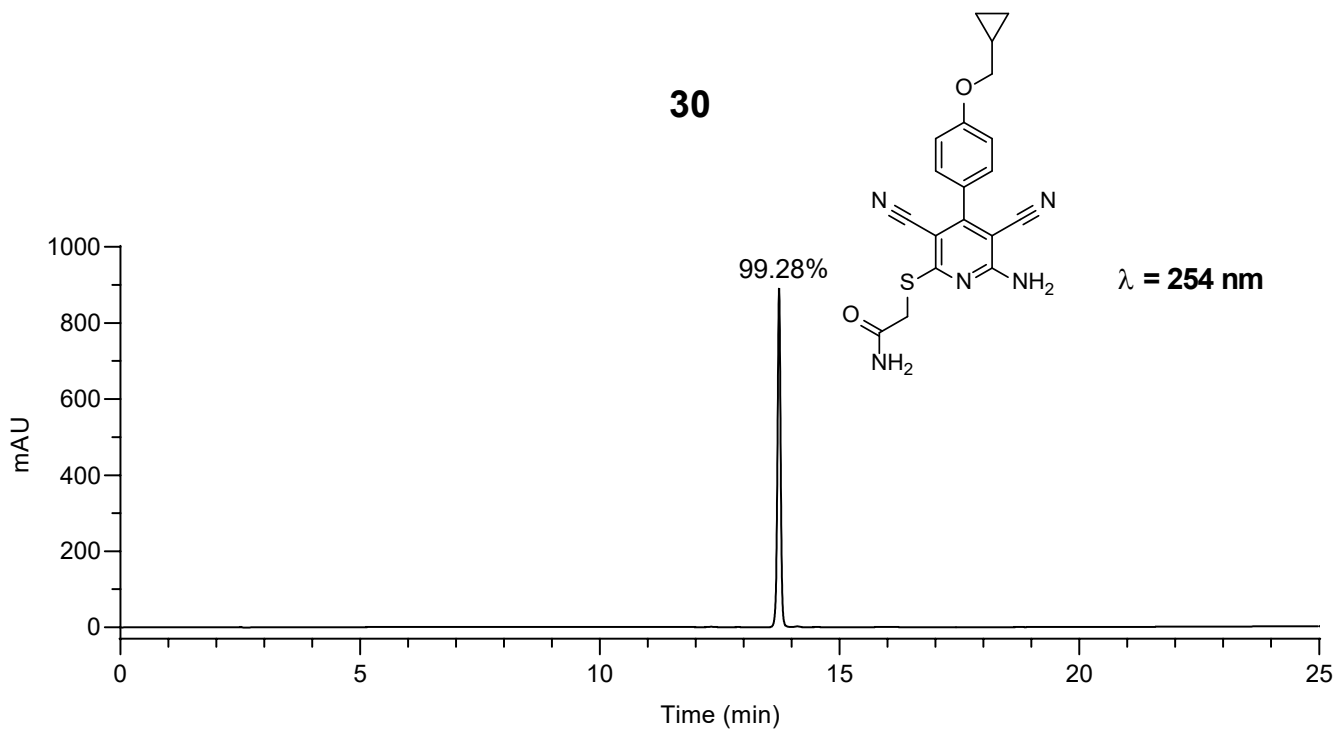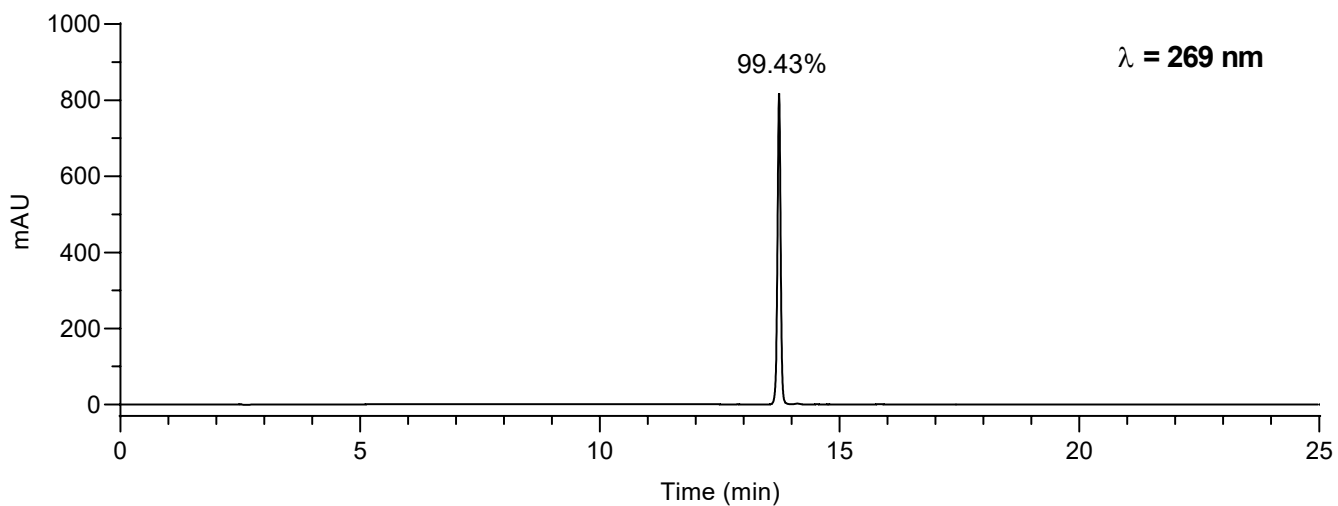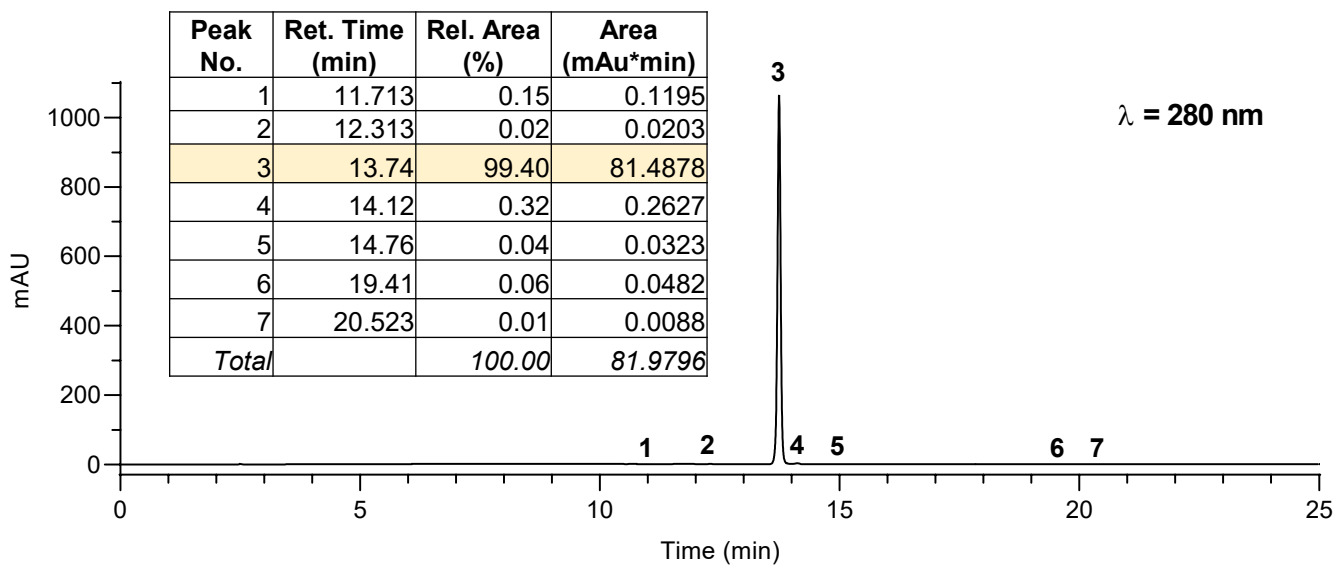

**31**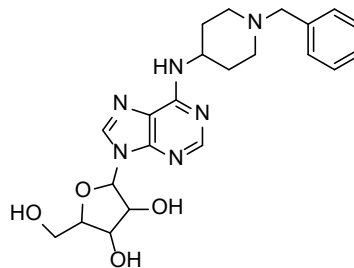

31 #1-30 RT: 0.02-0.42 AV: 30 NL: 1.46E7 T: FTMS  
+ p ESI Full ms [100.00-2000.00]

Full scan ESI(+)

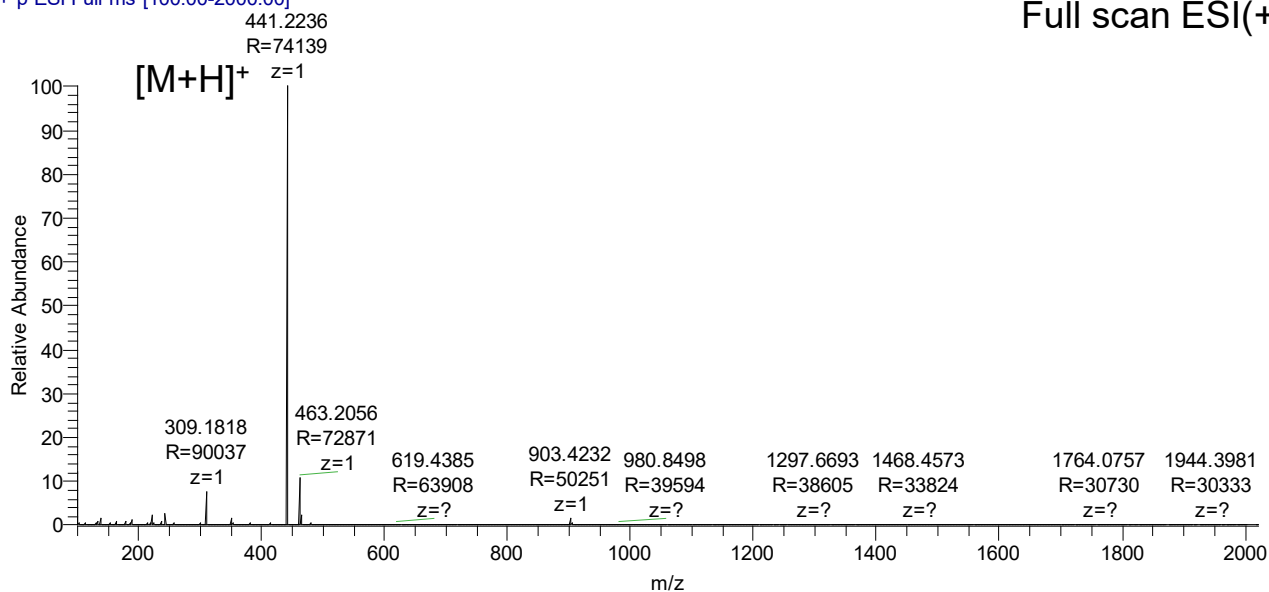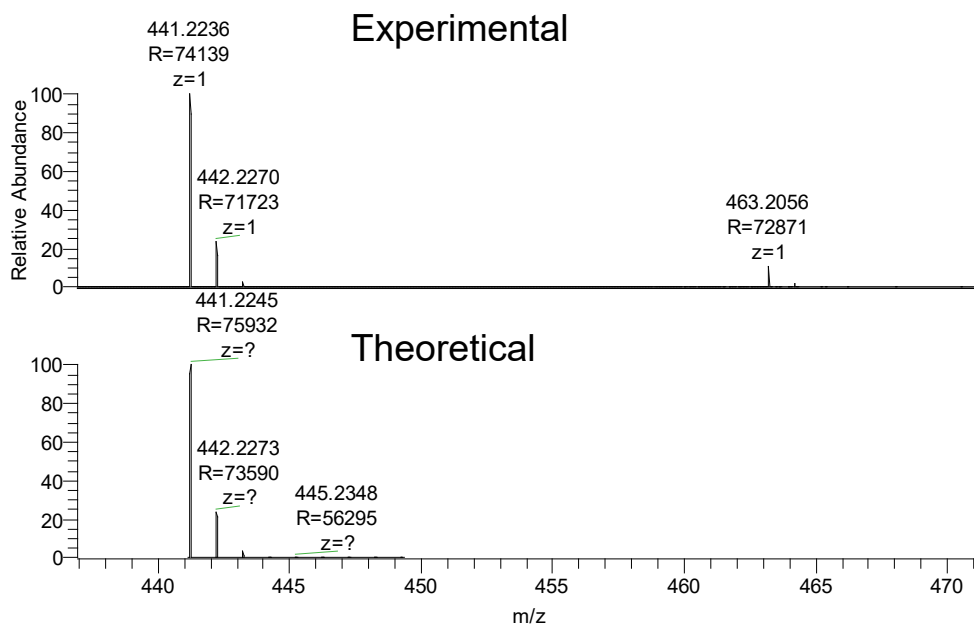

NL:  
1.46E7  
31#1-30 RT:  
0.02-0.42 AV: 30 T: FTMS +  
p ESI Full ms  
[100.00-2000.00]

NL:  
1.79E4  
C<sub>22</sub> H<sub>28</sub> N<sub>6</sub> O<sub>4</sub> +H:  
C<sub>22</sub> H<sub>29</sub> N<sub>6</sub> O<sub>4</sub>  
p (gss, s /p:40) Chrg 1  
R: 76000 Res. Pwr. @FWHM

$\Delta m = 2.04$  ppm



**31**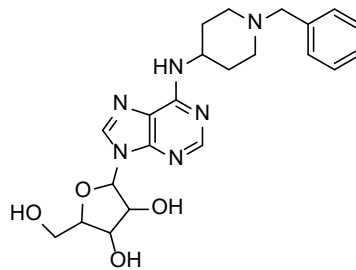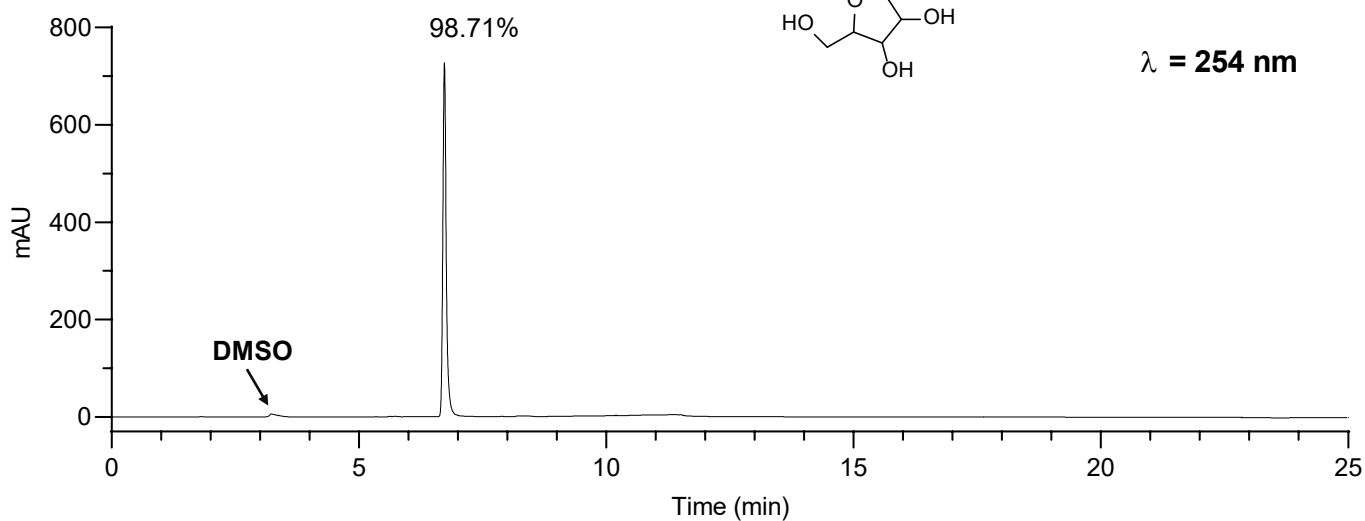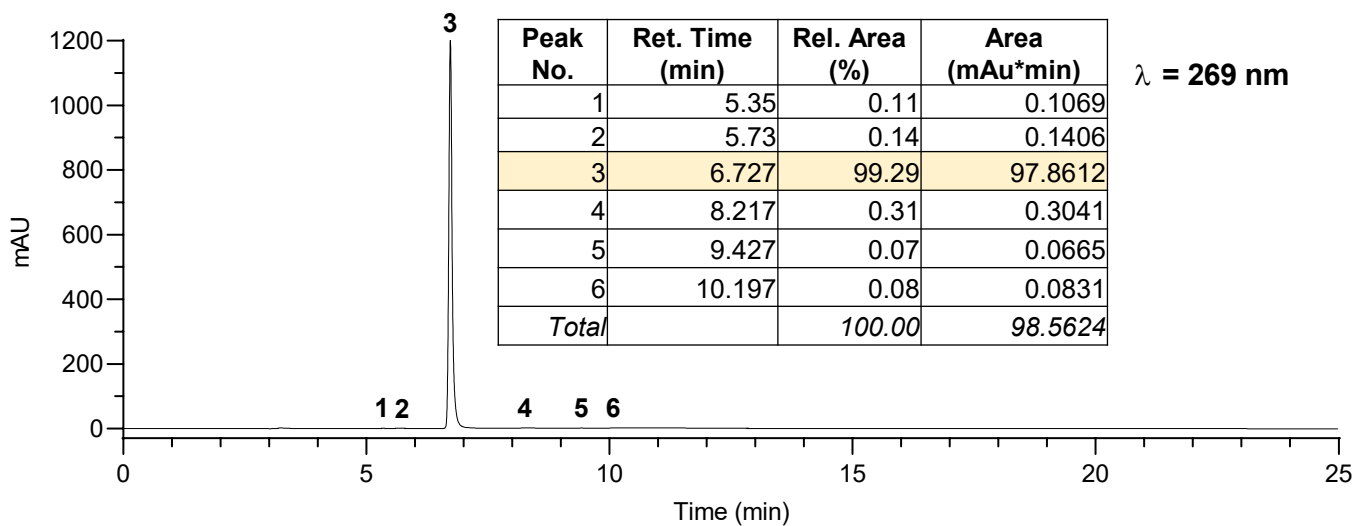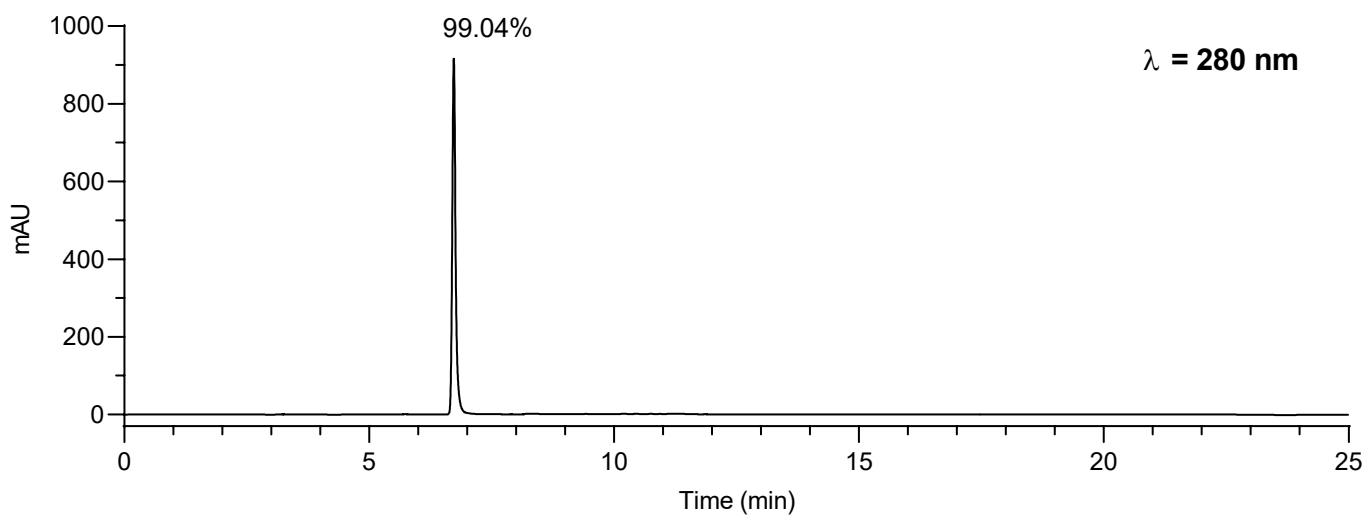

32

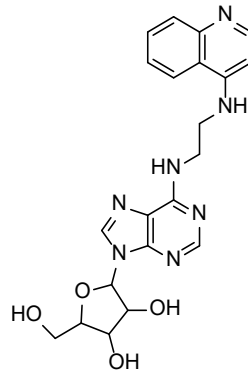

32 #1-30 RT: 0.02-0.42 AV: 30 NL: 1.49E7 T: FTMS  
+ p ESI Full ms [100.00-2000.00]

Full scan ESI(+)

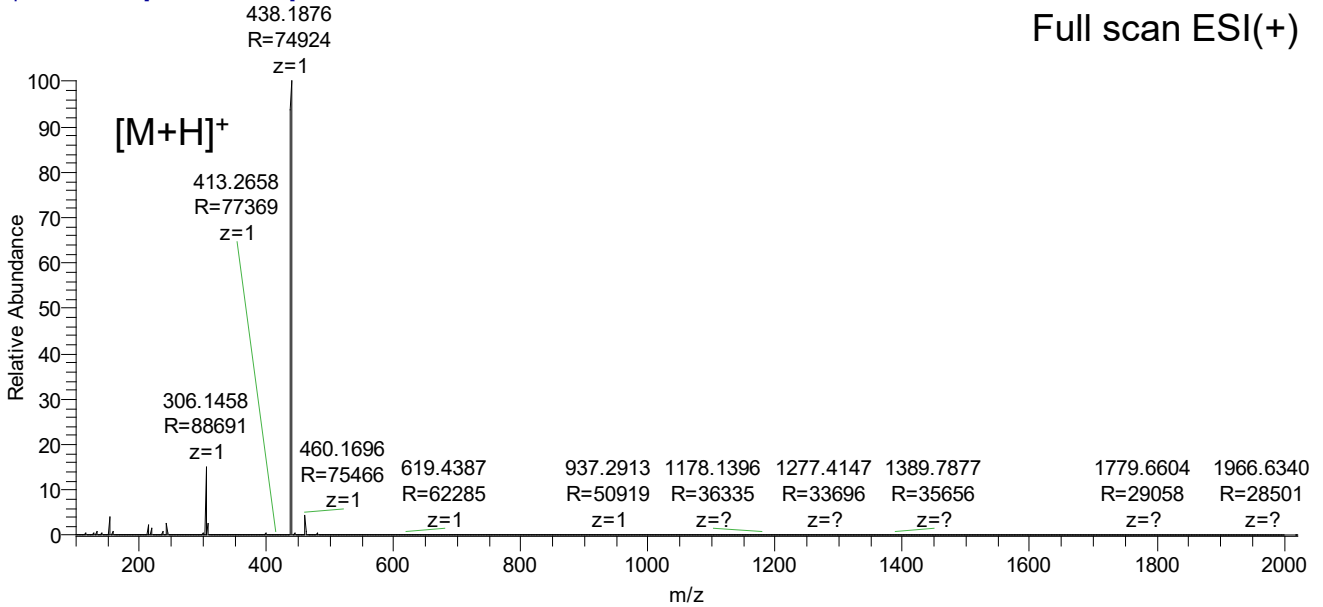

Experimental

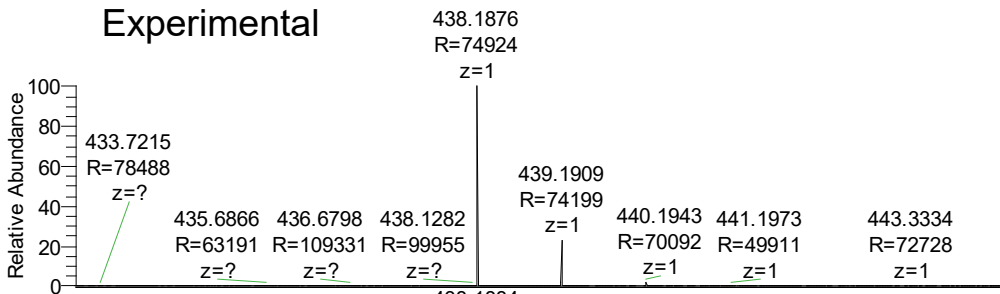

NL: 1.49E7  
32#1-30 RT: 0.02-0.42 AV: 30 T: FTMS + p ESI Full ms [100.00-2000.00]

Theoretical

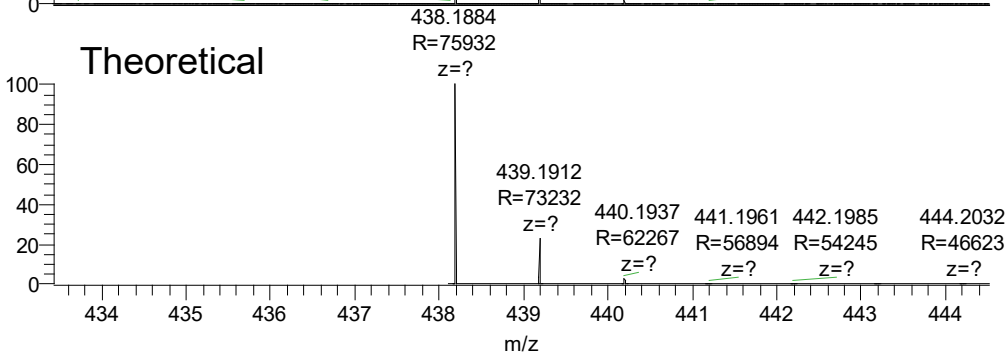

NL: 1.80E4  
C<sub>21</sub>H<sub>23</sub>N<sub>7</sub>O<sub>4</sub> +H:  
C<sub>21</sub>H<sub>24</sub>N<sub>7</sub>O<sub>4</sub>  
p (gss, s /p:40) Chrg 1  
R: 76000 Res .Pwr . @FWHM

Δm= 1.83 ppm

**32**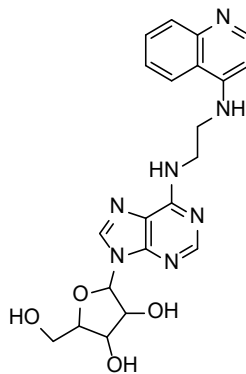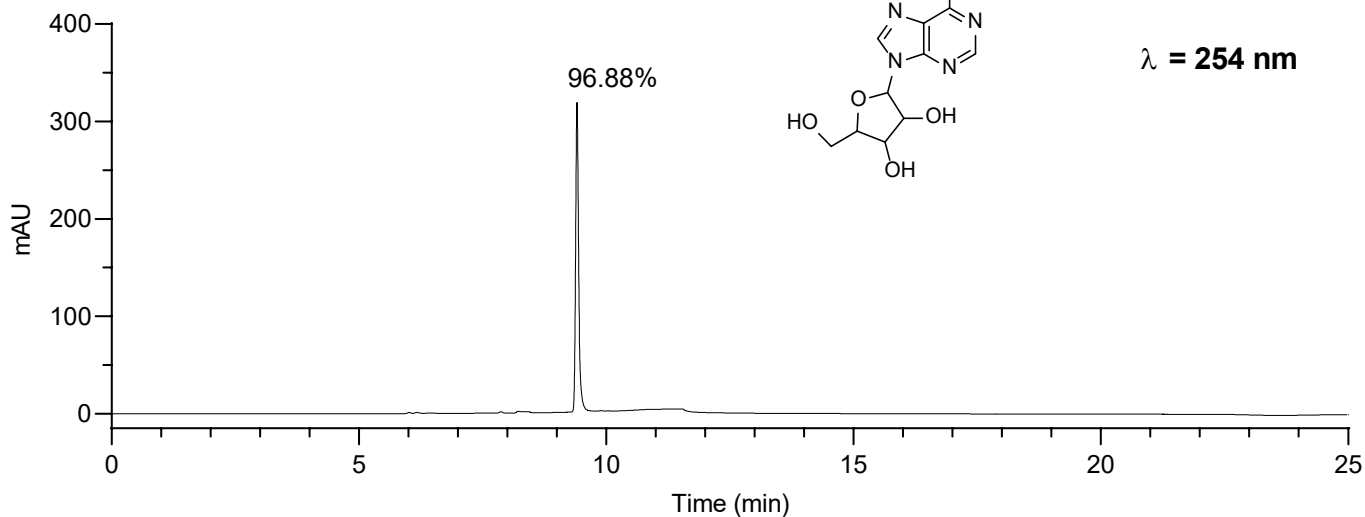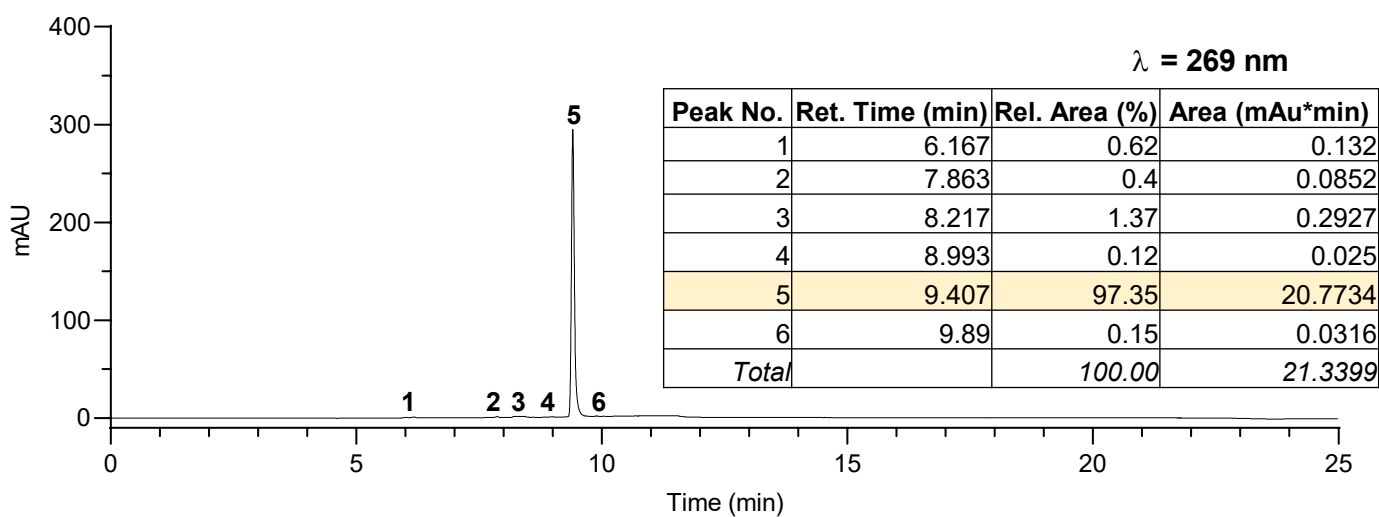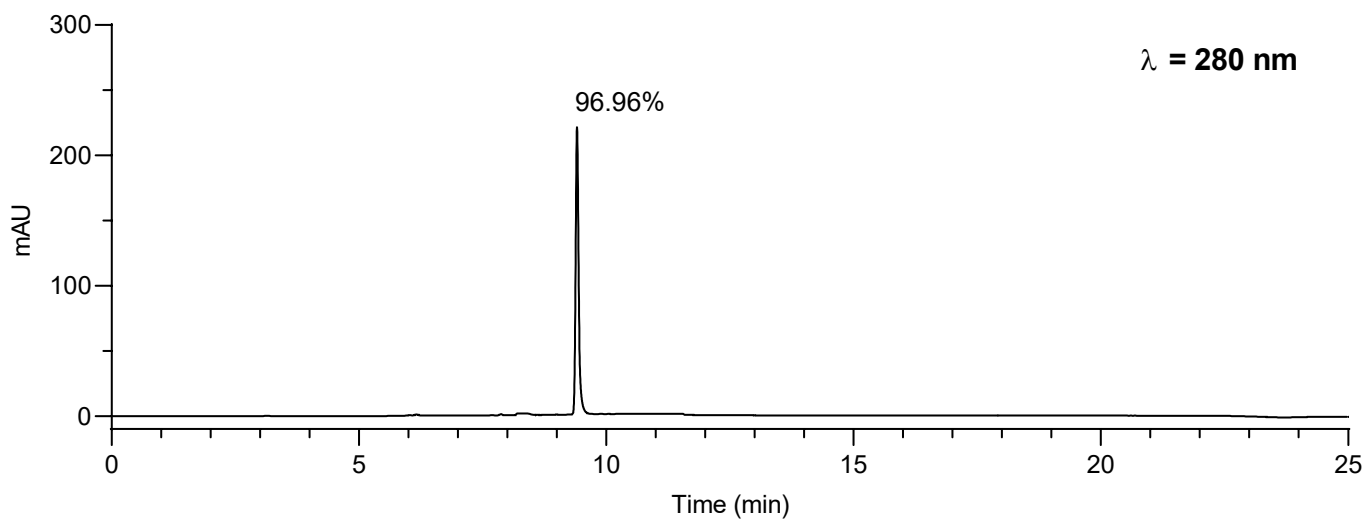

33

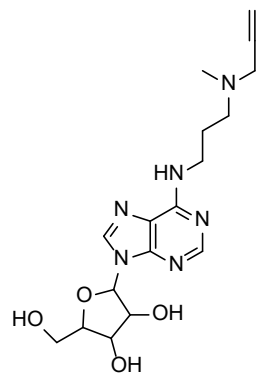

33 #1-30 RT: 0.02-0.41 AV: 30 NL: 3.09E7 T: FTMS  
+ p ESI Full ms [100.00-2000.00]

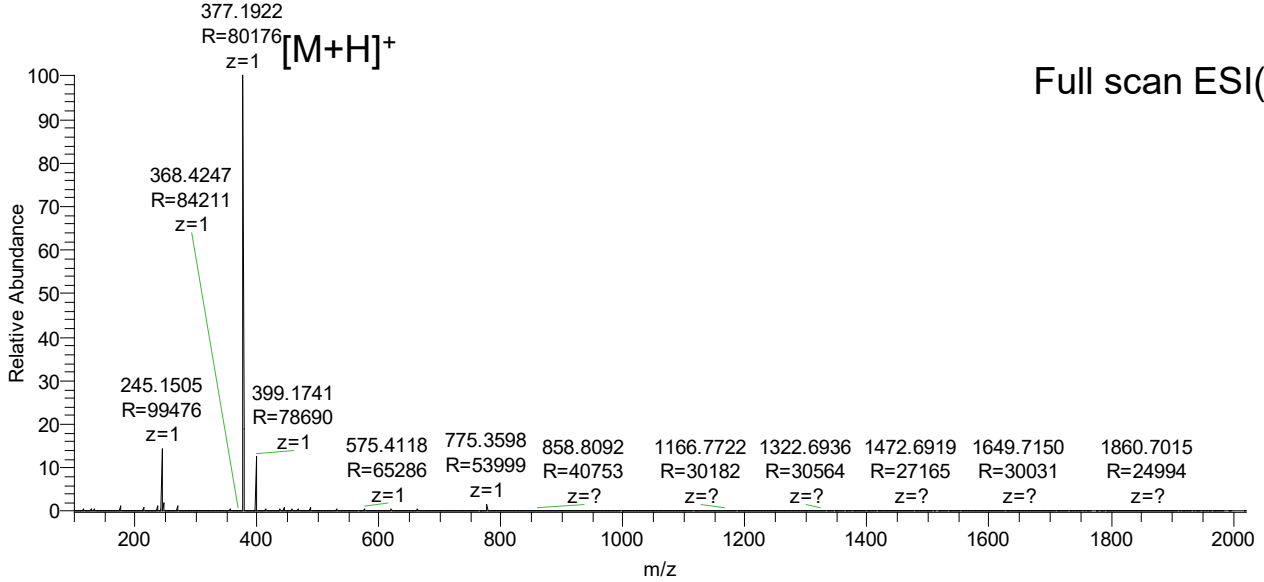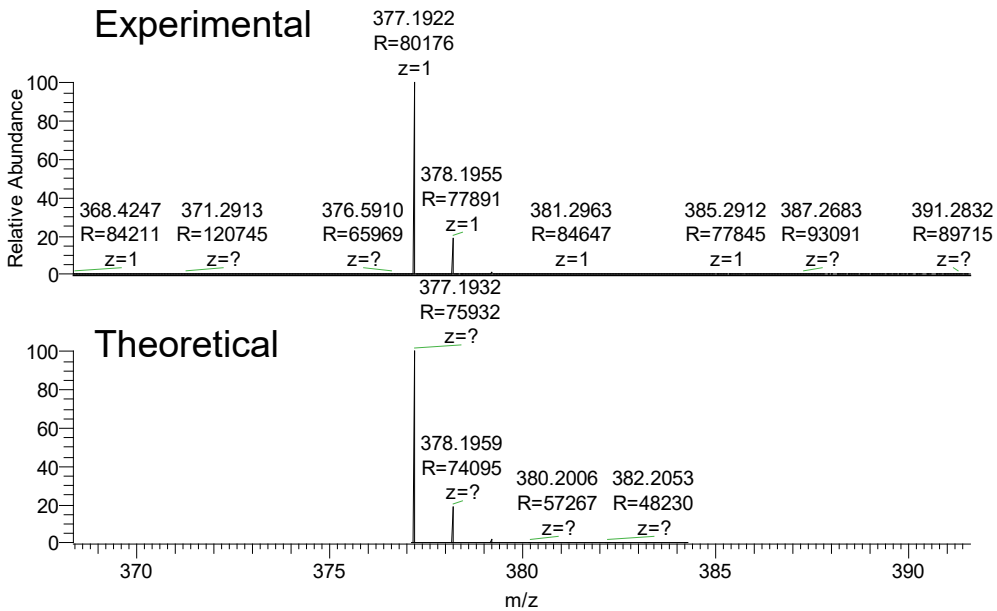

**33**

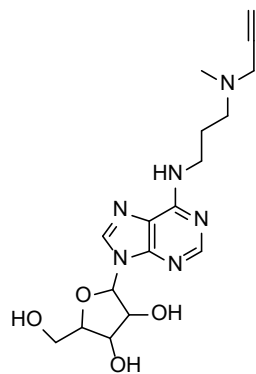

$\lambda = 254 \text{ nm}$

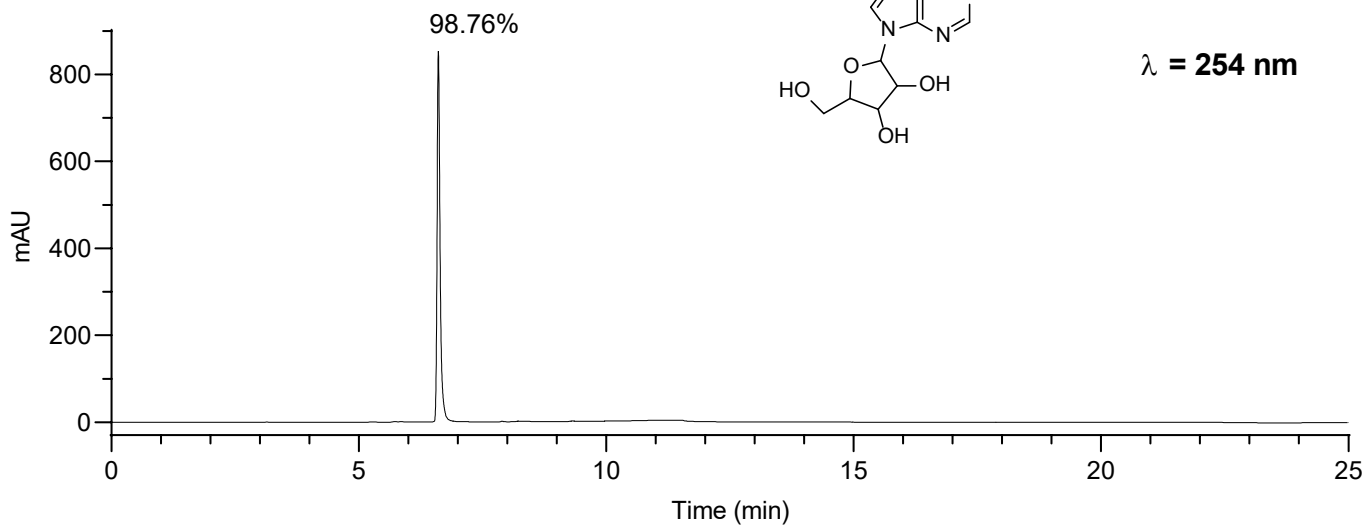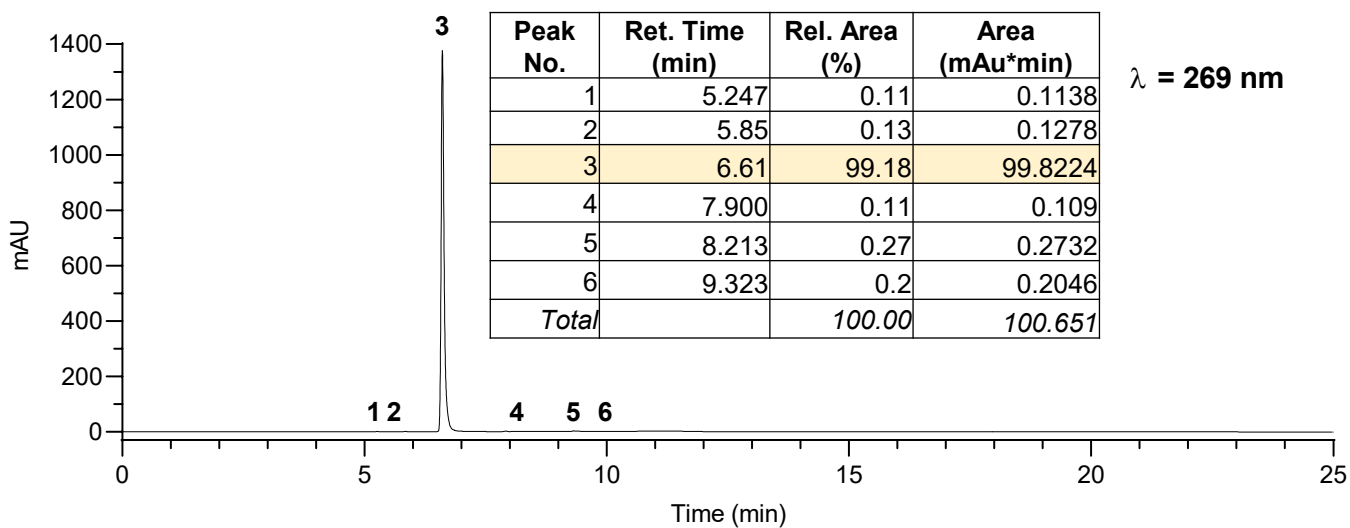

$\lambda = 269 \text{ nm}$

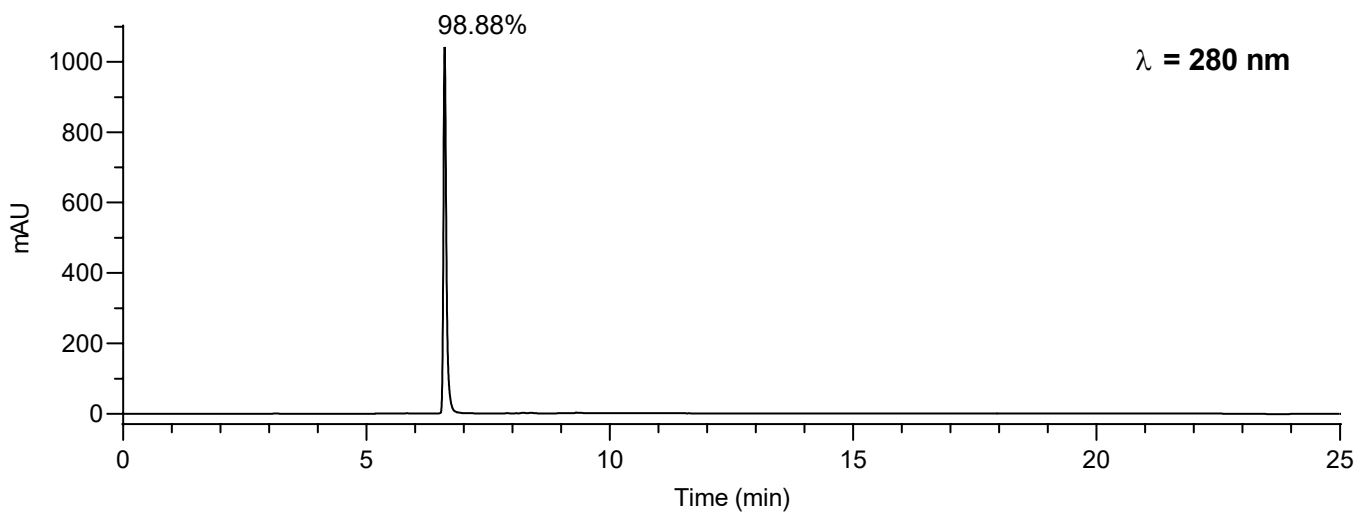

$\lambda = 280 \text{ nm}$

34

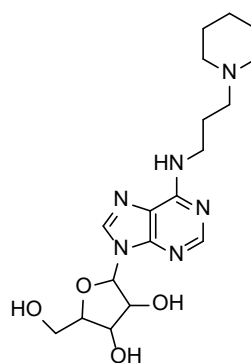

34 #1-30 RT: 0.02-0.41 AV: 30 NL: 1.28E8 T: FTMS  
+ p ESI Full ms [100.00-2000.00]

Full scan ESI(+)

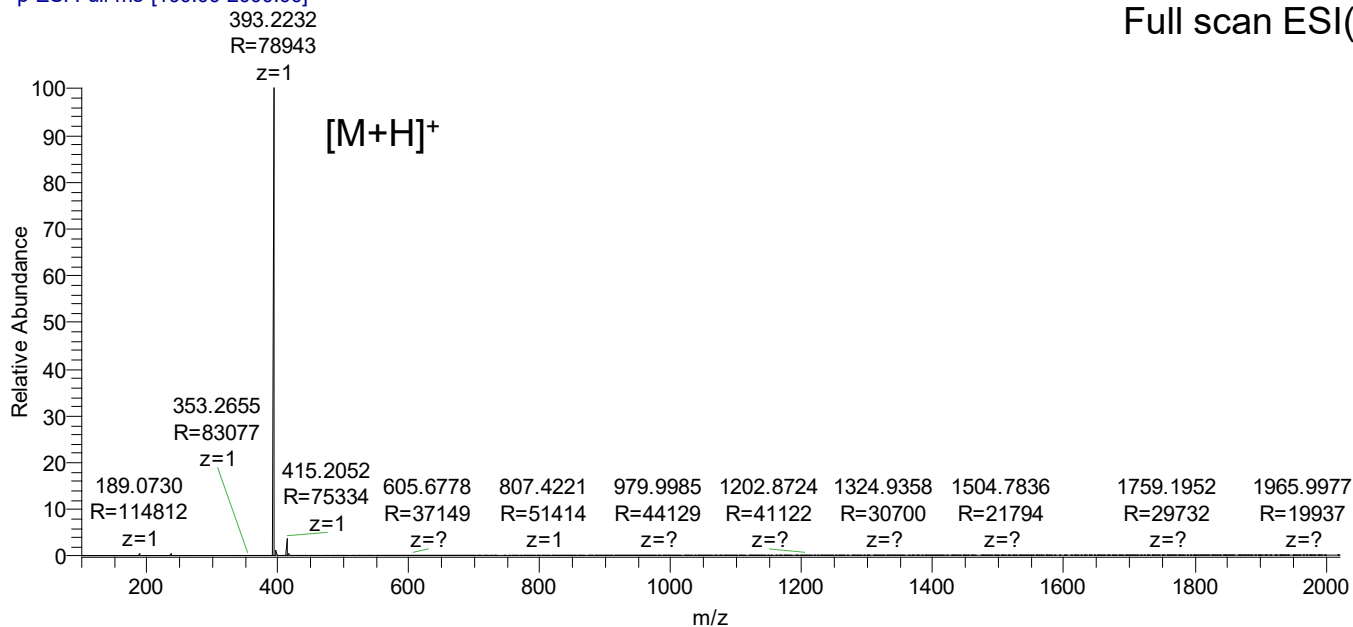

Experimental

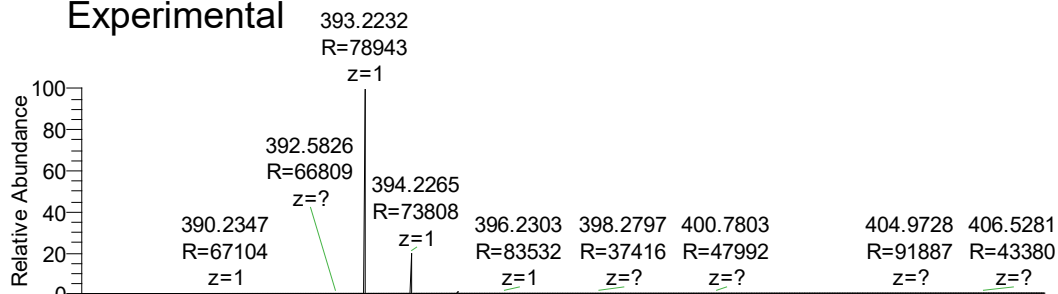

NL:  
1.28E8  
34#1-30 RT:  
0.02-0.41 AV: 30 T: FTMS +  
p ESI Full ms  
[100.00-2000.00]

Theoretical

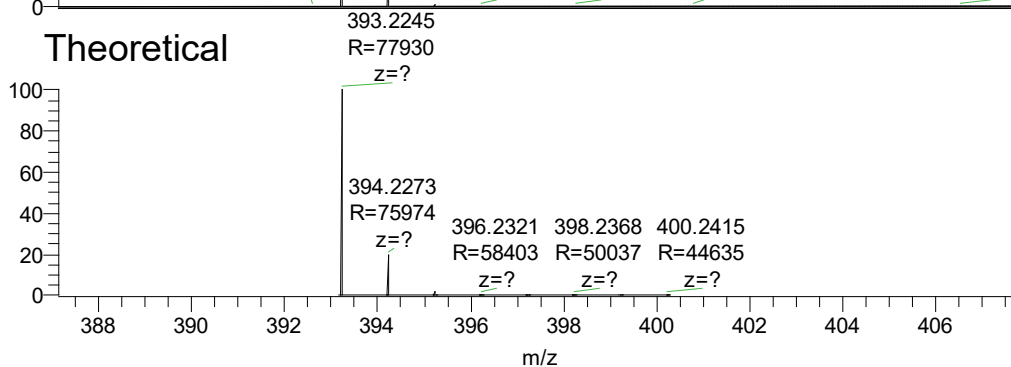

NL:  
1.87E4  
C<sub>18</sub>H<sub>28</sub>N<sub>6</sub>O<sub>4</sub> +H:  
C<sub>18</sub>H<sub>29</sub>N<sub>6</sub>O<sub>4</sub>  
p (gss, s /p:40) Chrg 1  
R: 78000 Res .Pwr . @FWHM

 $\Delta m = 3.31$  ppm

**34**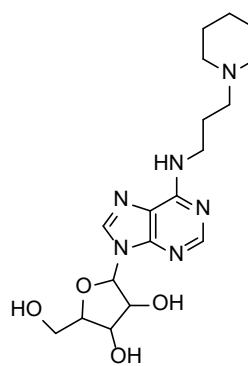 $\lambda = 254 \text{ nm}$ 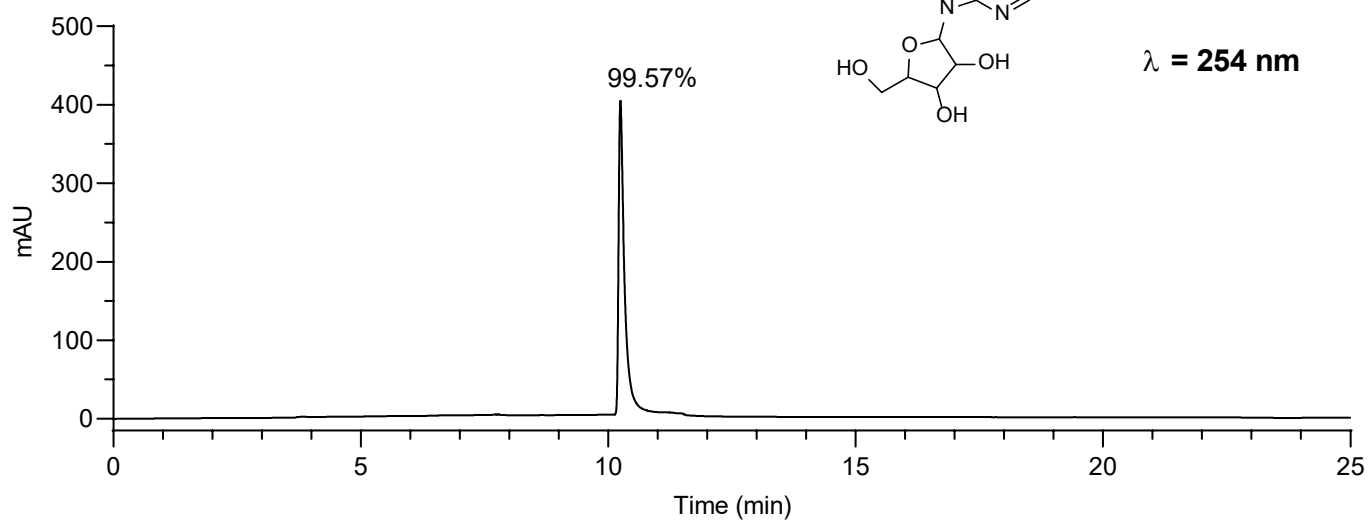 $\lambda = 269 \text{ nm}$ 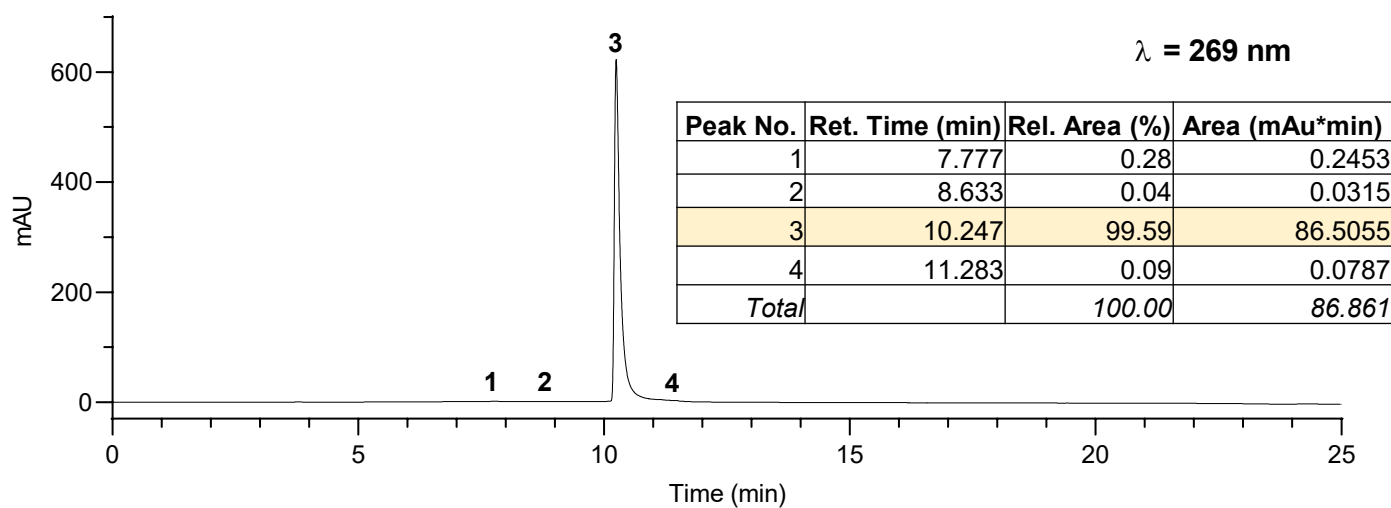 $\lambda = 280 \text{ nm}$ 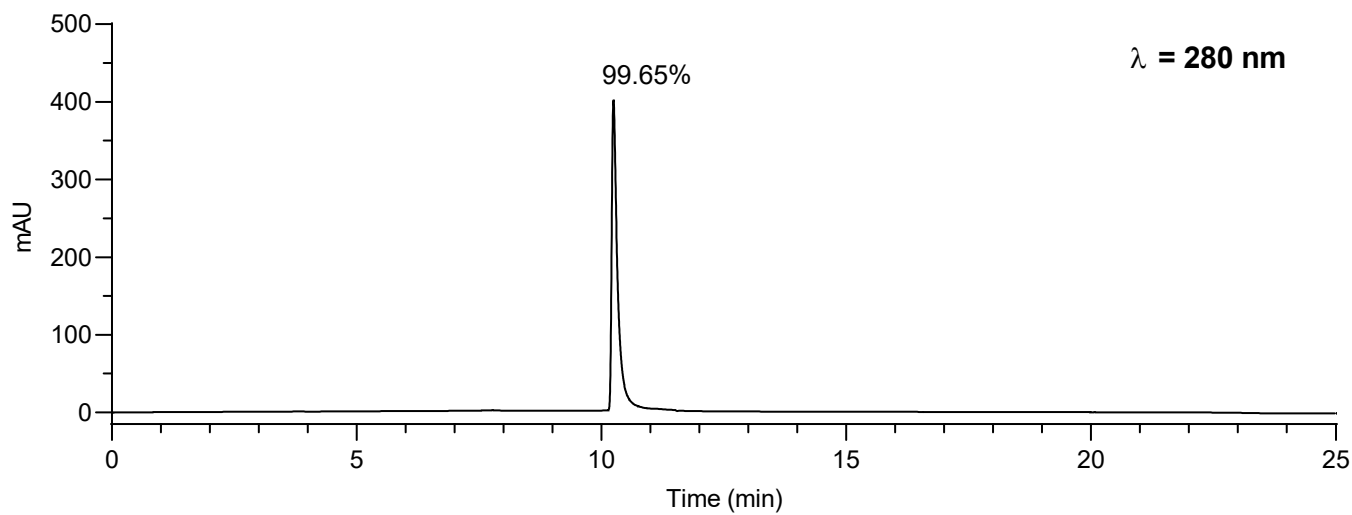

35

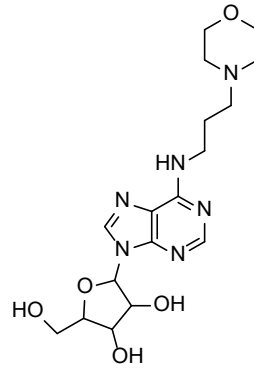

35 #1-30 RT: 0.02-0.41 AV: 30 NL: 1.24E7 T: FTMS + p  
ESI Full ms [100.00-2000.00]

Full scan ESI(+)

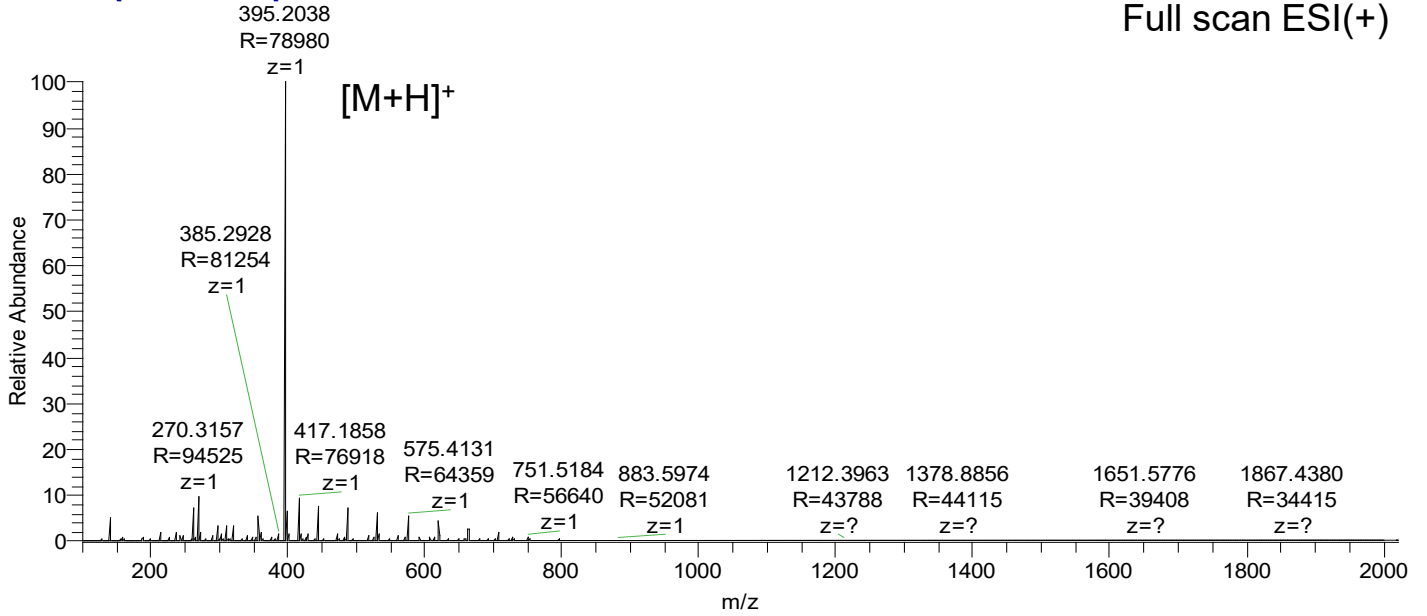

Experimental

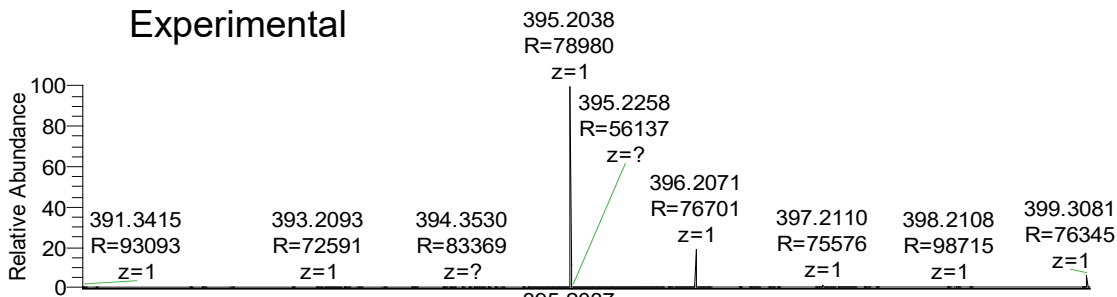

NL: 1.24E7  
35#1-30 RT: 0.02-0.41 AV: 30 T: FTMS + p ESI Full ms [100.00-2000.00]

Theoretical

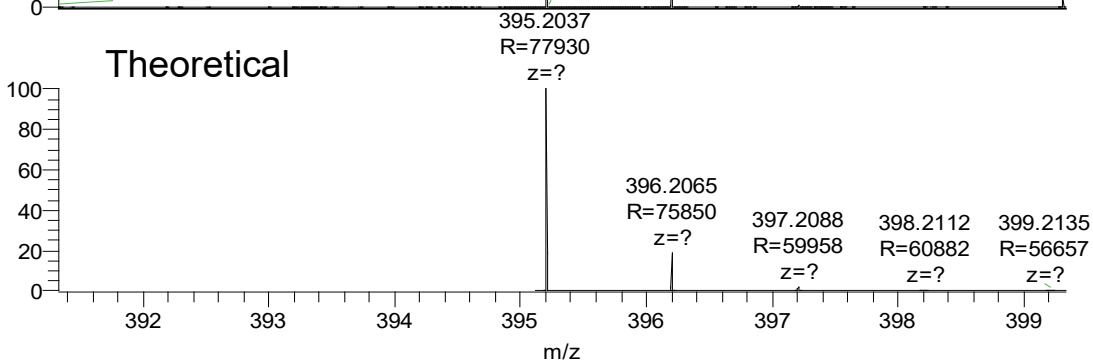

NL: 1.88E4  
C<sub>17</sub>H<sub>26</sub>N<sub>6</sub>O<sub>5</sub> +H:  
C<sub>17</sub>H<sub>27</sub>N<sub>6</sub>O<sub>5</sub>  
p (gss, s /p:40) Chrg 1  
R: 78000 Res .Pwr . @FWHM

$\Delta m = 0.25$  ppm



**35**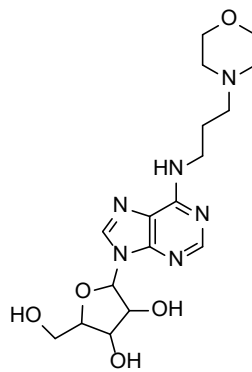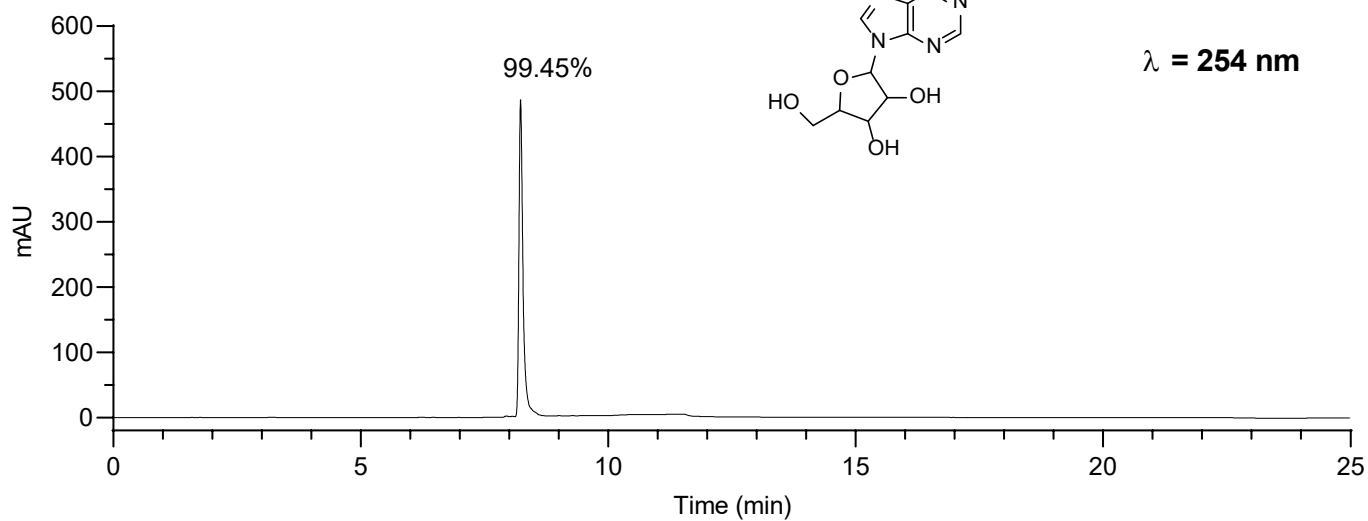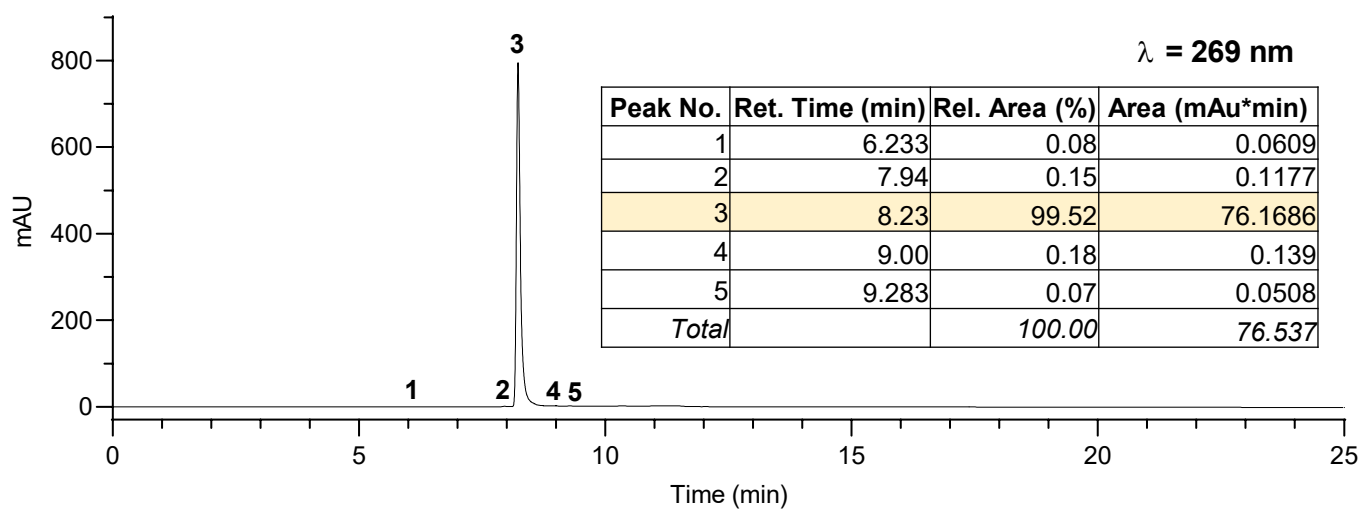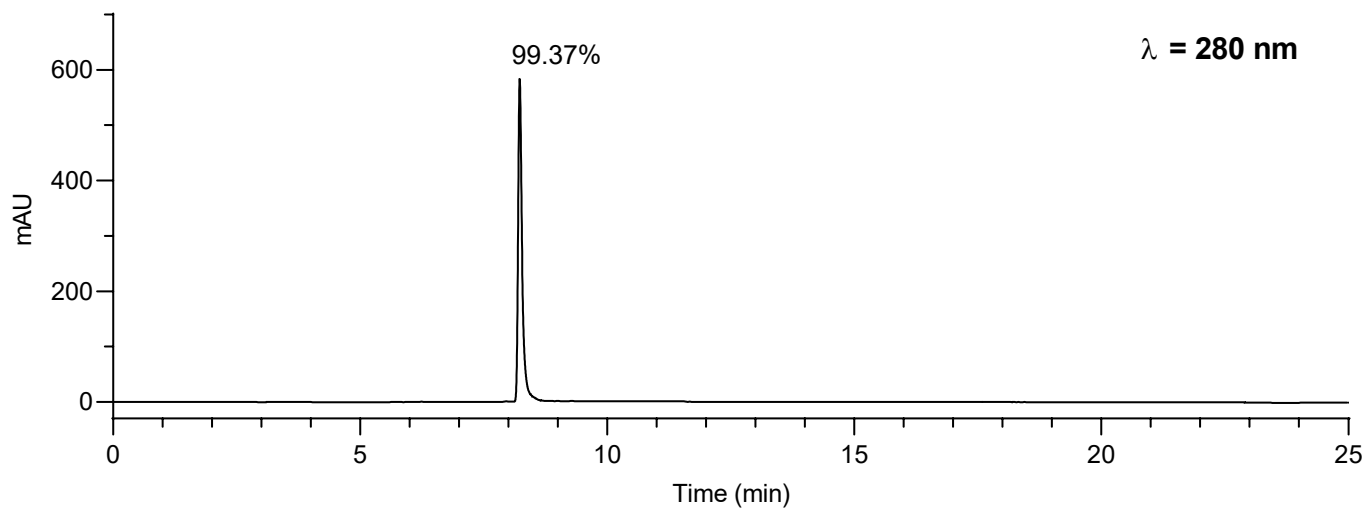

36

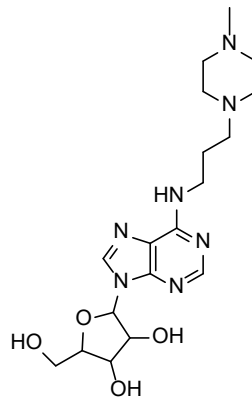

36 #2-26 RT: 0.03-0.36 AV: 25 NL: 5.60E6 T: FTMS  
+ p ESI Full ms [100.00-2000.00]

Full scan ESI(+)

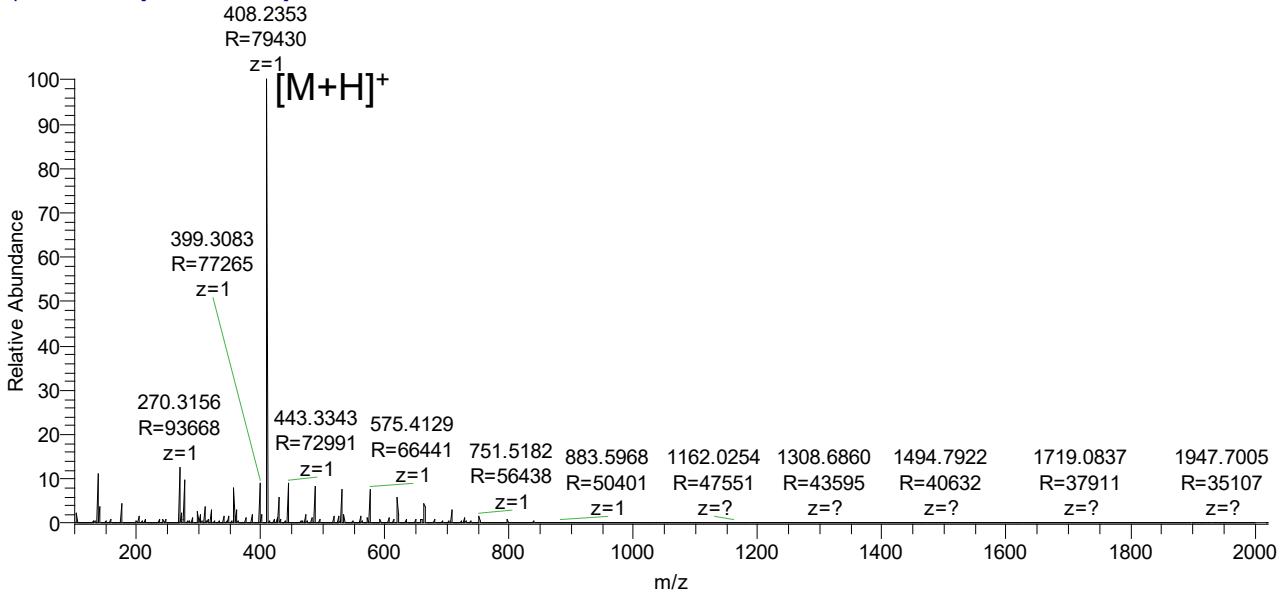

Experimental

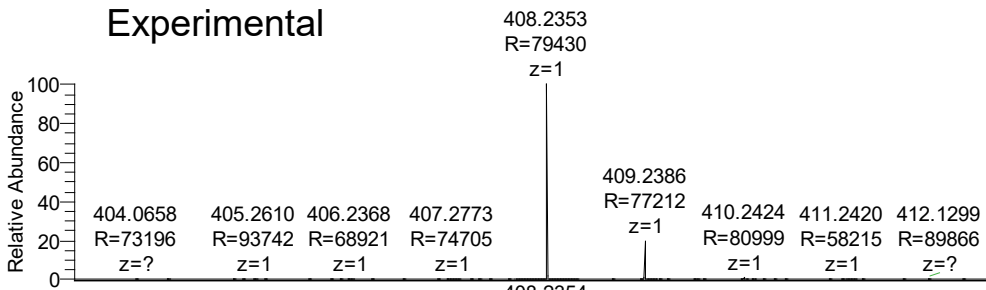

NL:  
5.60E6  
36#2-26 RT:  
0.03-0.36 AV: 25 T: FTMS +  
p ESI Full ms  
[100.00-2000.00]

Theoretical

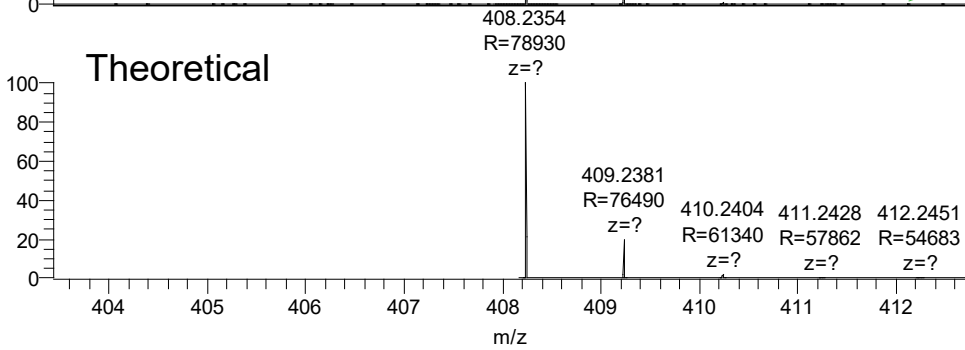

NL:  
1.86E4  
C<sub>18</sub>H<sub>29</sub>N<sub>7</sub>O<sub>4</sub> +H:  
C<sub>18</sub>H<sub>30</sub>N<sub>7</sub>O<sub>4</sub>  
p (gss, s /p:40) Chrg 1  
R: 79000 Res. Pwr. @FWHM

$\Delta m = 0.24 \text{ ppm}$

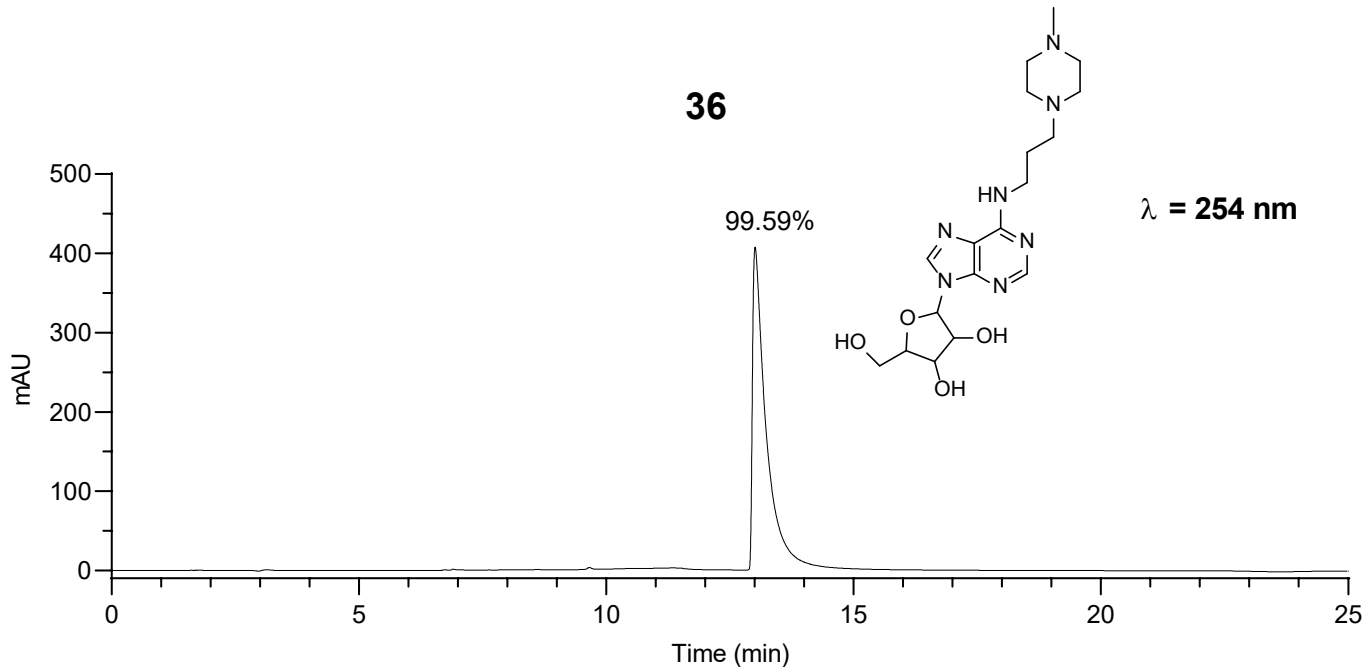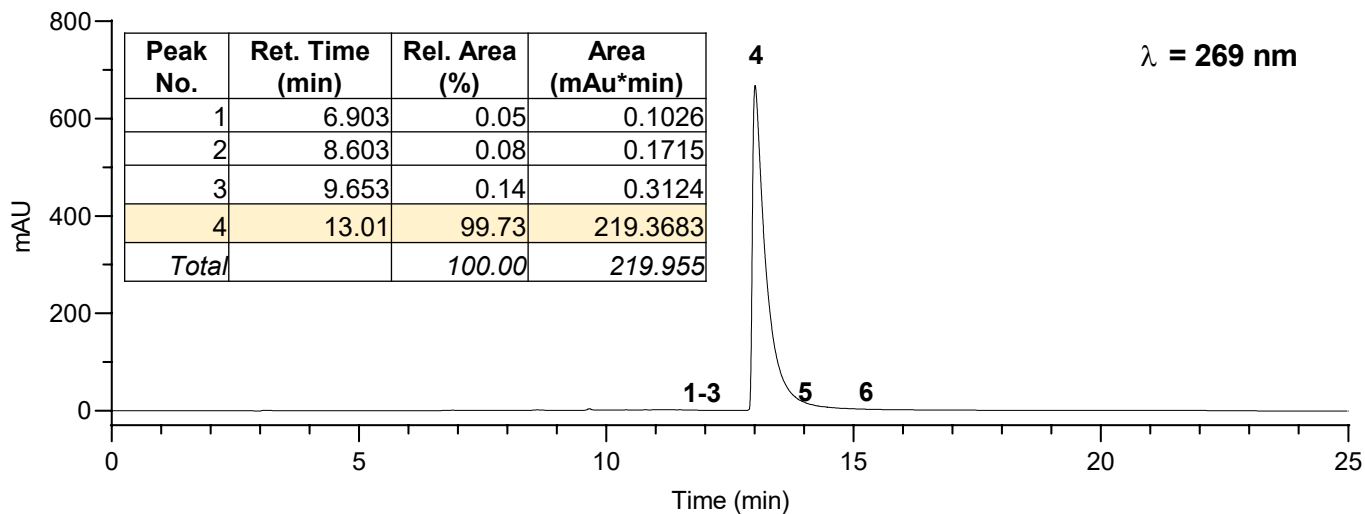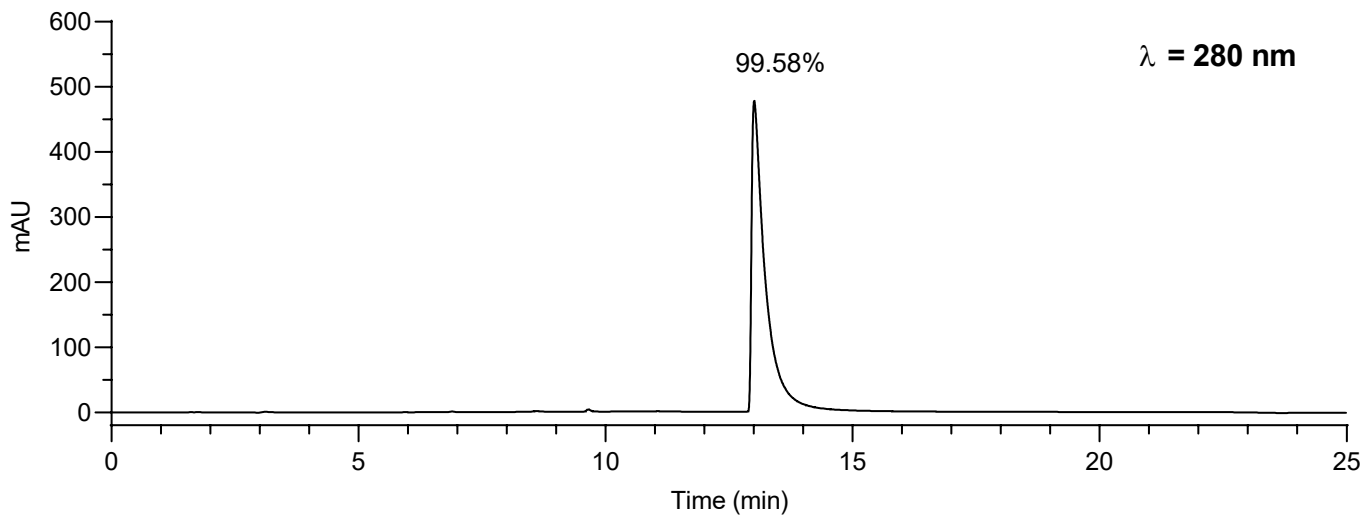

37

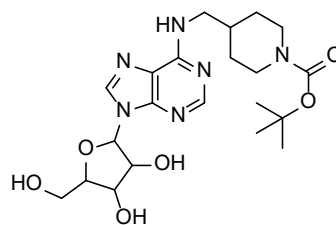

37 #2-29 RT: 0.03-0.41 AV: 28 NL: 9.35E6 T: FTMS  
+ p ESI Full ms [100.00-2000.00]

Full scan ESI(+)

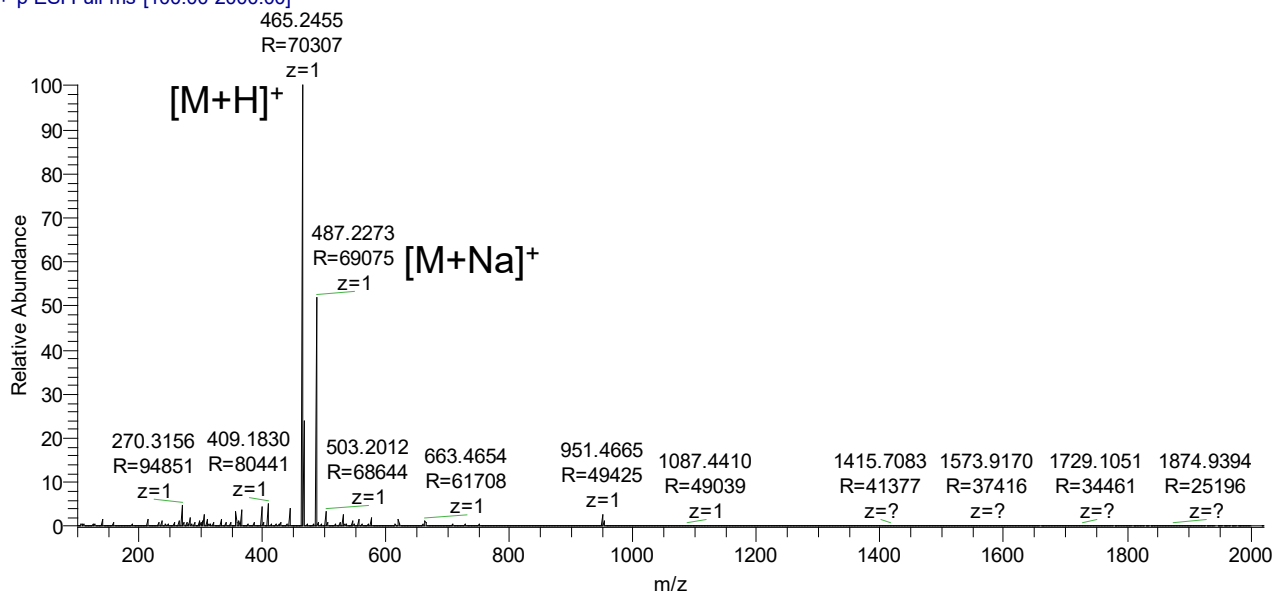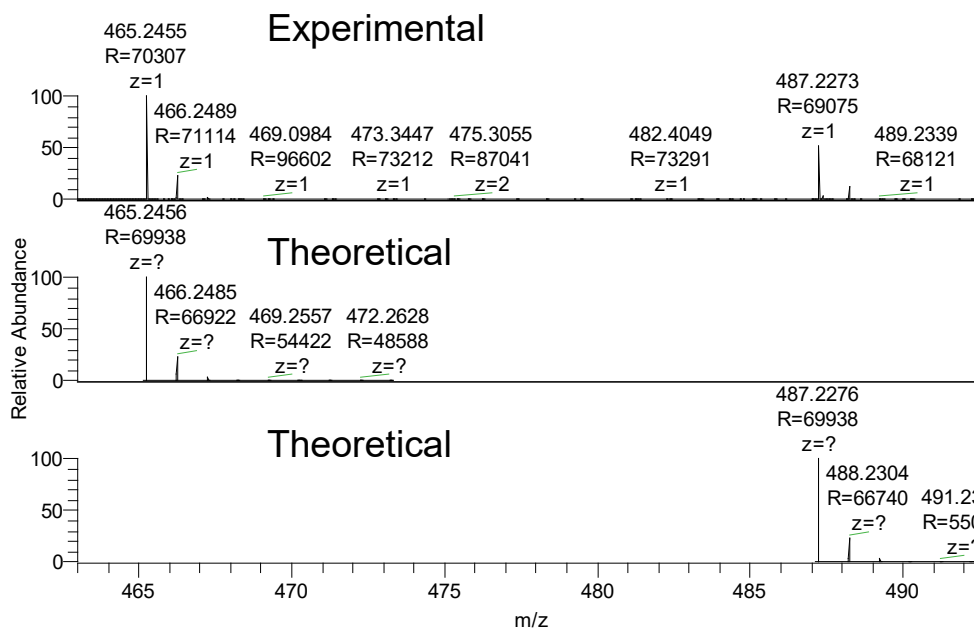

NL:  
9.35E6  
37#2-29 RT: 0.03-0.41 AV:  
28 T: FTMS + p ESI Full ms  
[100.00-2000.00]

NL:  
1.80E4  $\Delta m = 0.21 \text{ ppm}$

C<sub>21</sub>H<sub>32</sub>N<sub>6</sub>O<sub>6</sub> + H:  
C<sub>21</sub>H<sub>33</sub>N<sub>6</sub>O<sub>6</sub>  
p (gss, s /p:40) Chrg 1  
R: 70000 Res .Pwr . @FWHM

NL:  
1.80E4  $\Delta m = 0.62 \text{ ppm}$

C<sub>21</sub>H<sub>32</sub>N<sub>6</sub>O<sub>6</sub> + Na:  
C<sub>21</sub>H<sub>32</sub>N<sub>6</sub>O<sub>6</sub>Na<sub>1</sub>  
p (gss, s /p:40) Chrg 1  
R: 70000 Res .Pwr . @FWHM

**37**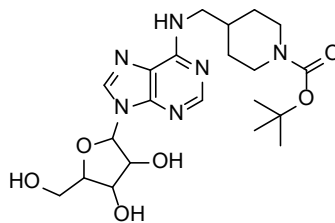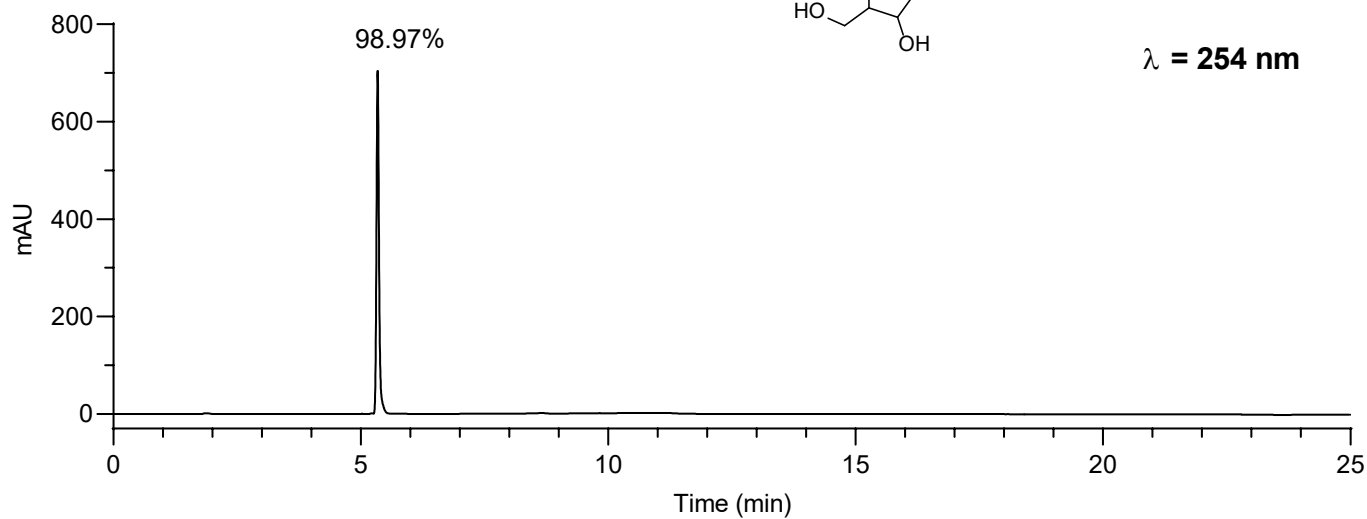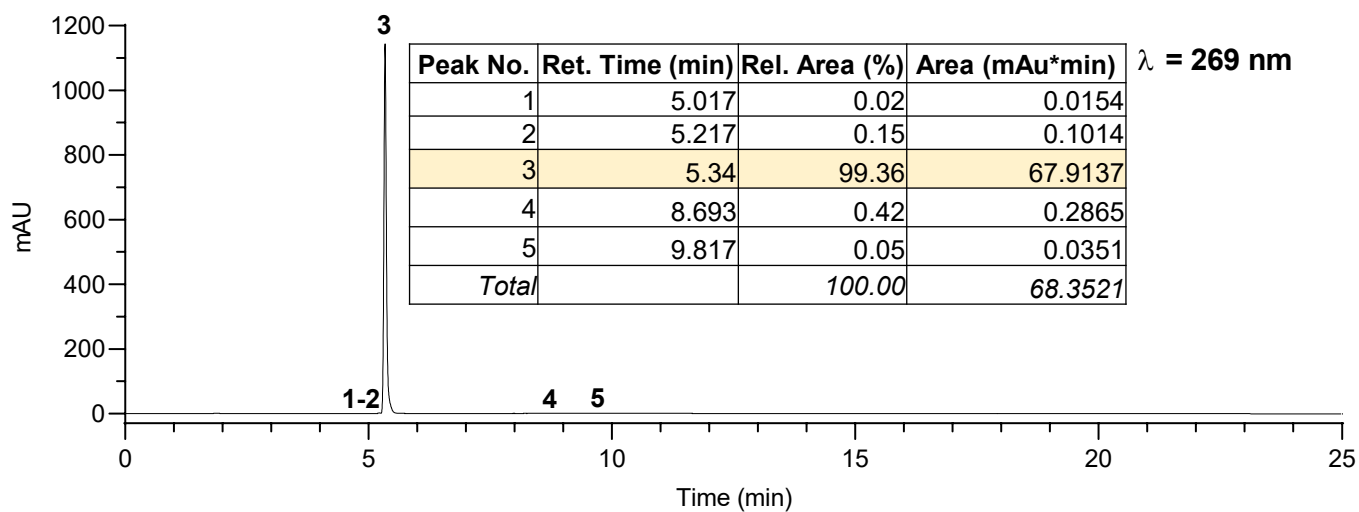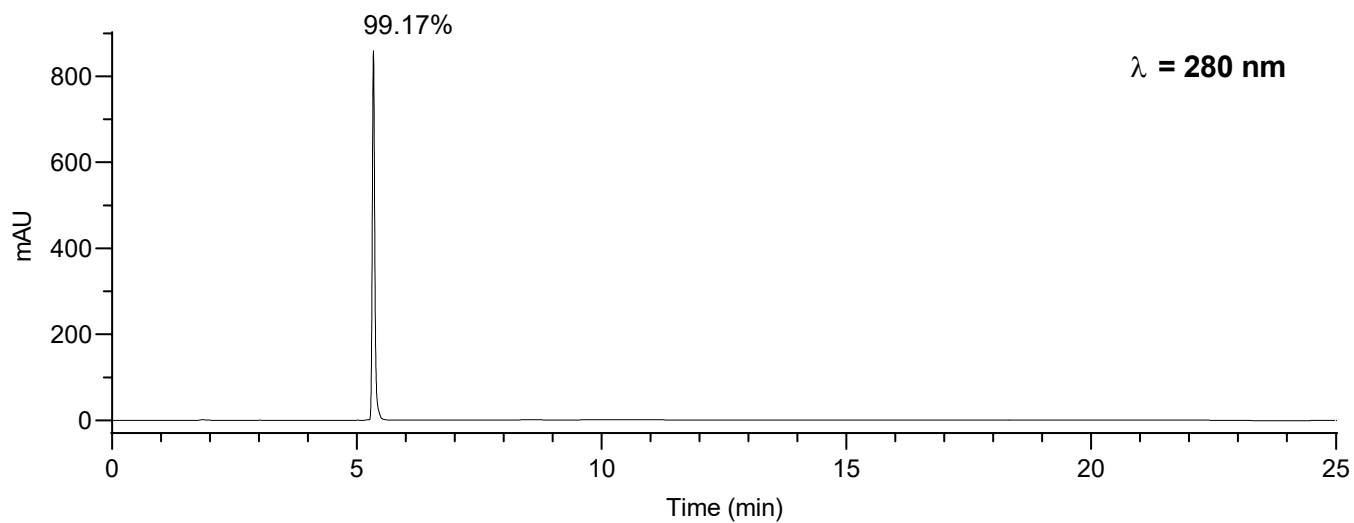

38

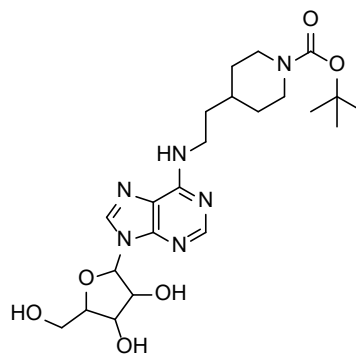

38 #1-30 RT: 0.02-0.42 AV: 30 NL: 1.51E7 T: FTMS  
+ p ESI Full ms [100.00-2000.00]

Full scan ESI(+)

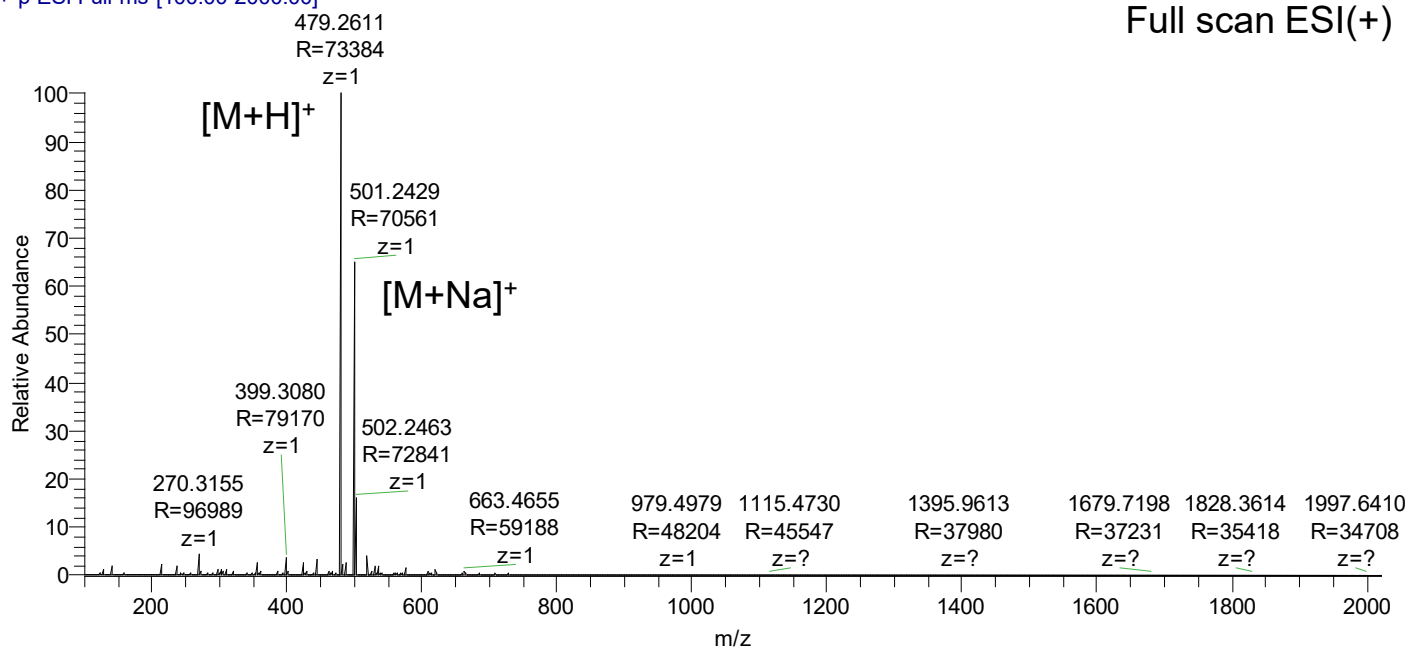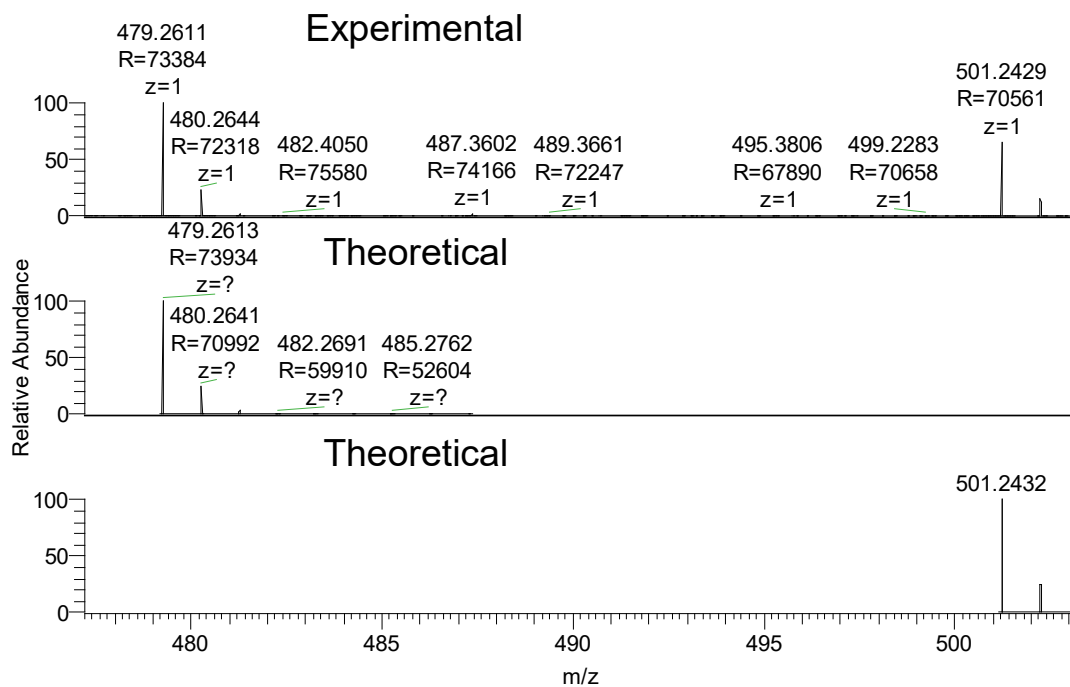

NL: 1.51E7  
38#1-30 RT: 0.02-0.42 AV: 30 T: FTMS + p ESI Full ms [100.00-2000.00]

NL: 1.78E4  $\Delta m = 0.42$  ppm

C<sub>22</sub>H<sub>34</sub>N<sub>6</sub>O<sub>6</sub> + H:  
C<sub>22</sub>H<sub>35</sub>N<sub>6</sub>O<sub>6</sub>  
p (gss, s /p:40) Chrg 1  
R: 74000 Res .Pwr . @FWHM

NL: 1.78E4  $\Delta m = 0.60$  ppm

C<sub>22</sub>H<sub>34</sub>N<sub>6</sub>O<sub>6</sub> + Na:  
C<sub>22</sub>H<sub>34</sub>N<sub>6</sub>O<sub>6</sub>Na<sub>1</sub>  
p (gss, s /p:40) Chrg 1  
R: 70000 Res .Pwr . @FWHM

**38**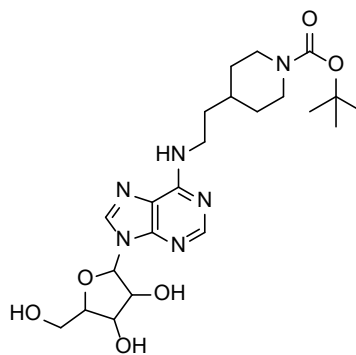 $\lambda = 254 \text{ nm}$ 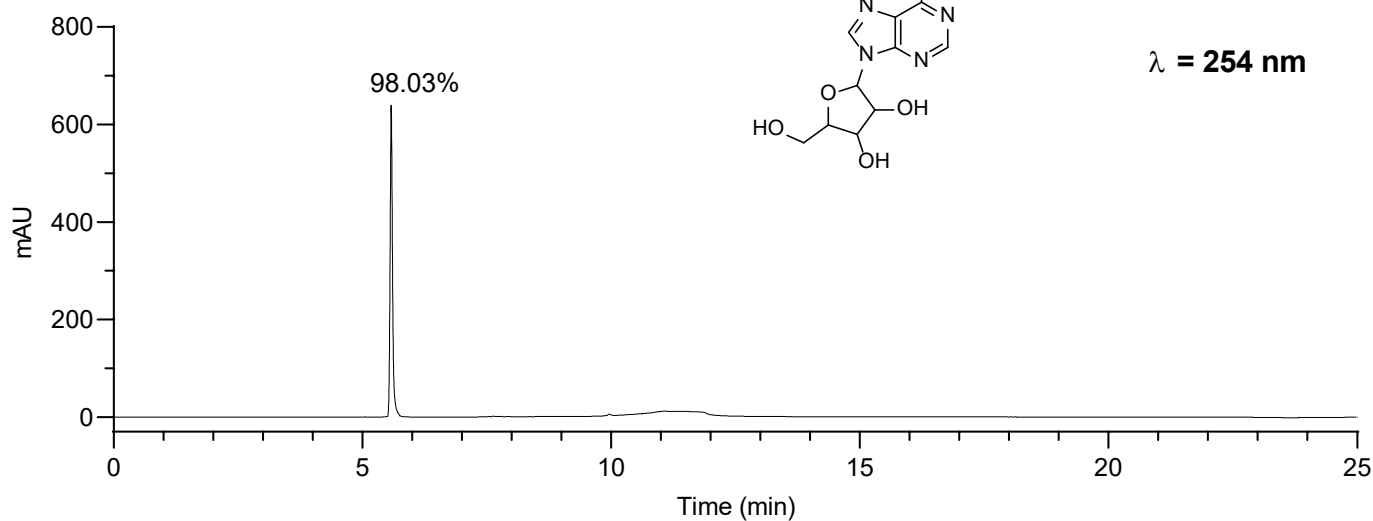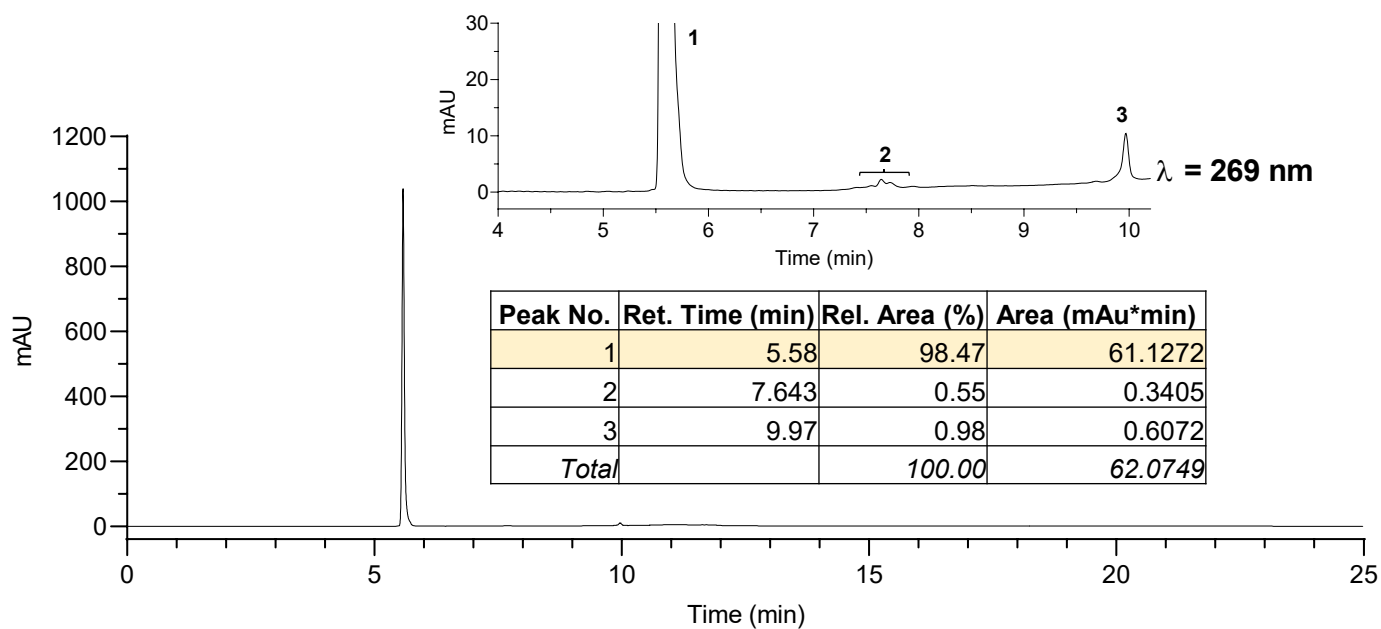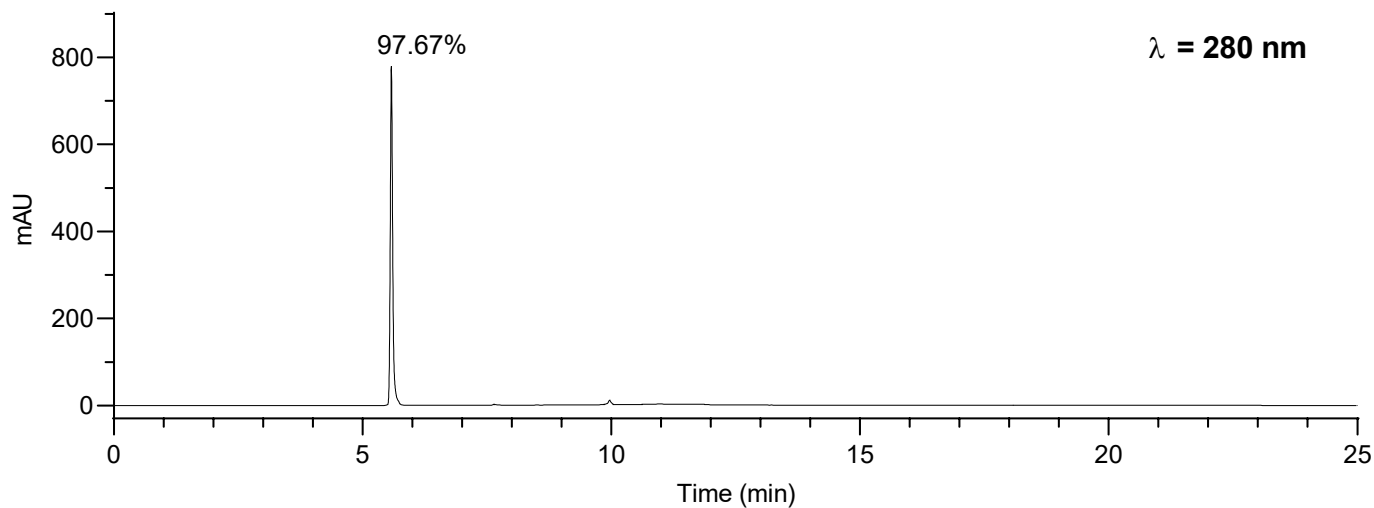

39

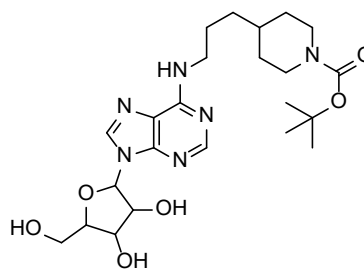

39 #1-29 RT: 0.02-0.40 AV: 29 NL: 2.97E7 T: FTMS  
+ p ESI Full ms [100.00-2000.00]

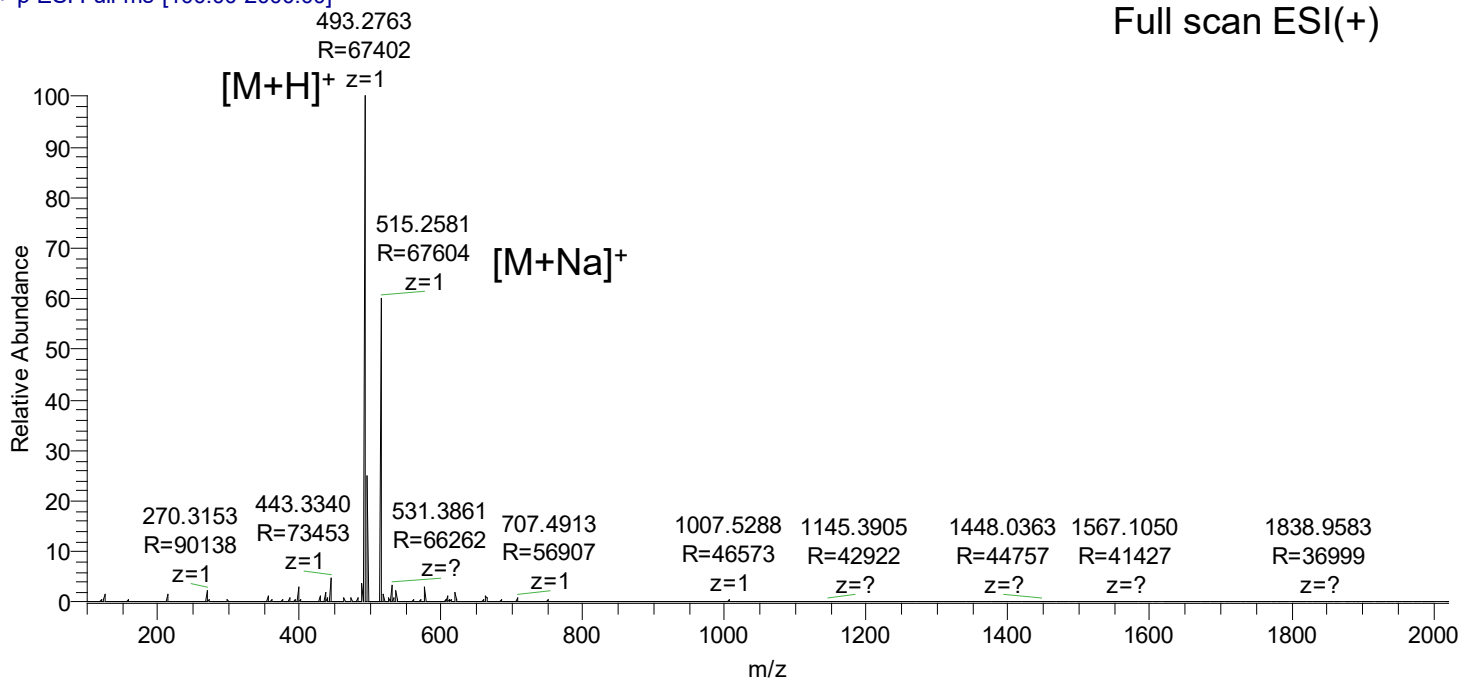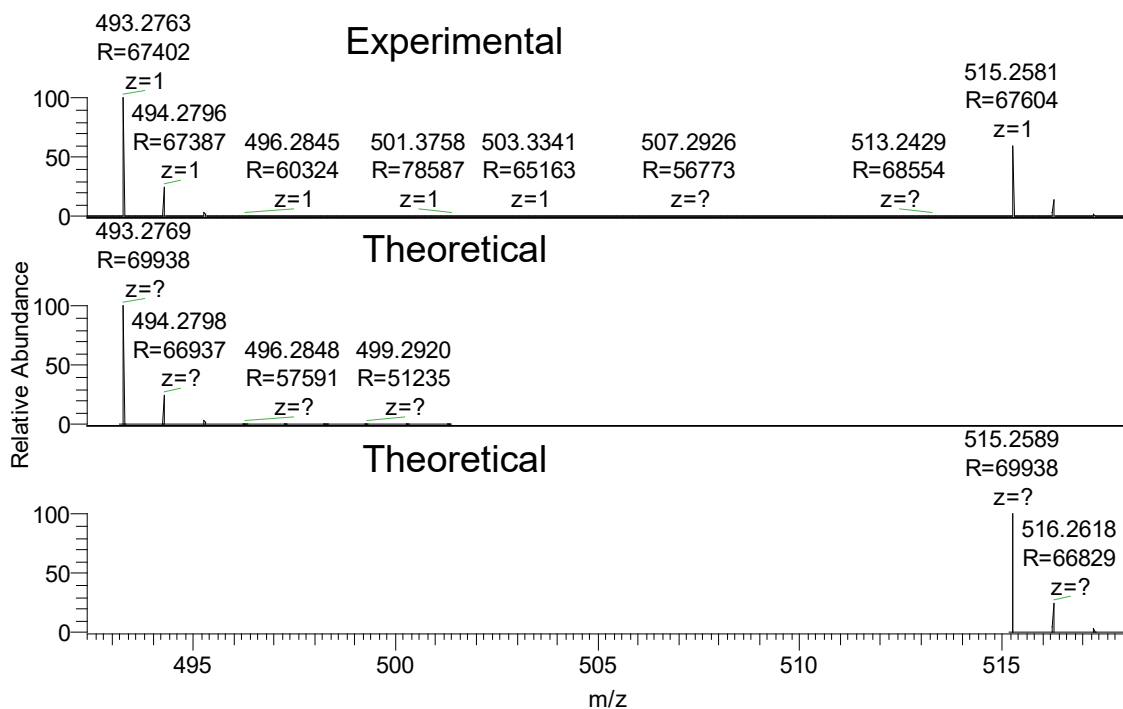

NL: 2.97E7  
39#1-29 RT: 0.02-0.40 AV: 29 T: FTMS + p ESI Full ms [100.00-2000.00]

NL:  $\Delta m = 1.22 \text{ ppm}$   
1.76E4

C<sub>23</sub> H<sub>36</sub> N<sub>6</sub> O<sub>6</sub> +H:  
C<sub>23</sub> H<sub>37</sub> N<sub>6</sub> O<sub>6</sub>  
p (gss, s /p:40) Chrg 1  
R: 70000 Res .Pwr. @FWHM

NL:  $\Delta m = 1.55 \text{ ppm}$   
1.76E4

C<sub>23</sub> H<sub>36</sub> N<sub>6</sub> O<sub>6</sub> +Na:  
C<sub>23</sub> H<sub>36</sub> N<sub>6</sub> O<sub>6</sub> Na<sub>1</sub>  
p (gss, s /p:40) Chrg 1  
R: 70000 Res .Pwr. @FWHM



**39**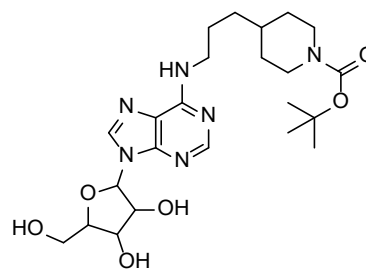 $\lambda = 254 \text{ nm}$ 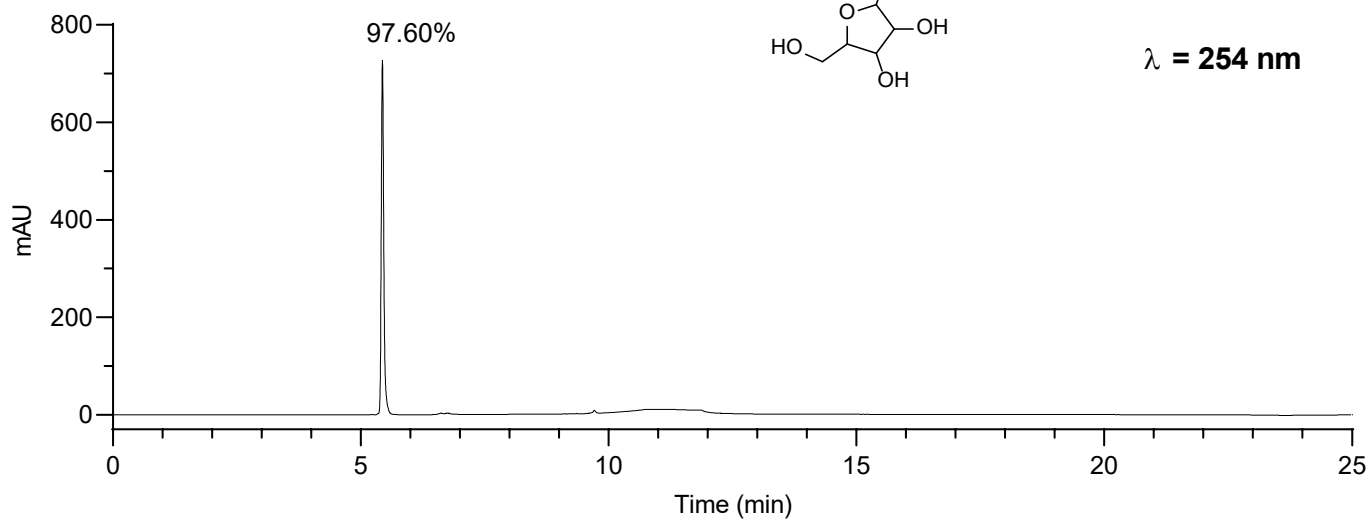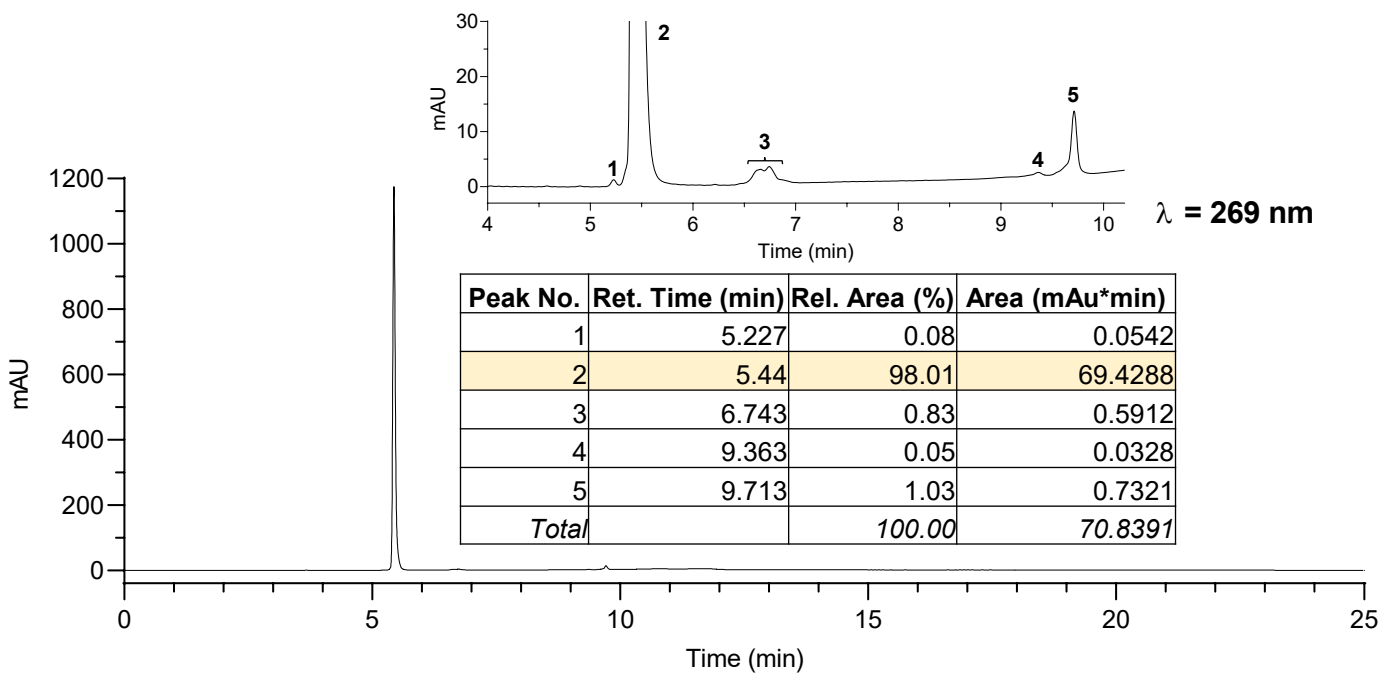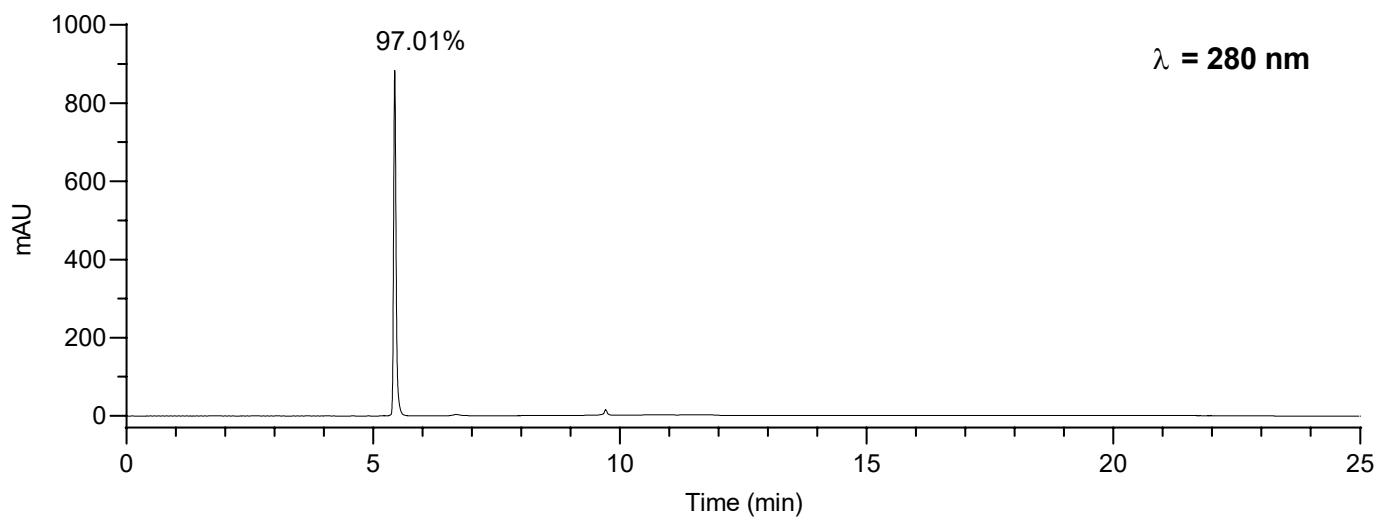

40

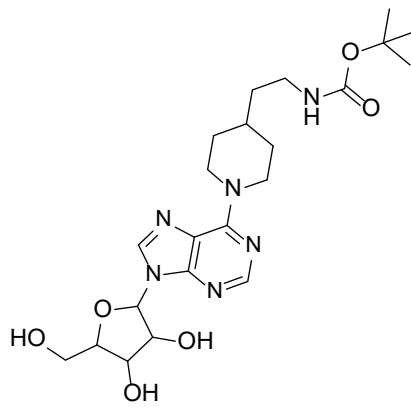

40 #1-30 RT: 0.02-0.45 AV: 30 NL: 2.94E6 T: FTMS  
+ p ESI Full ms [100.00-2000.00]

Full scan ESI(+)

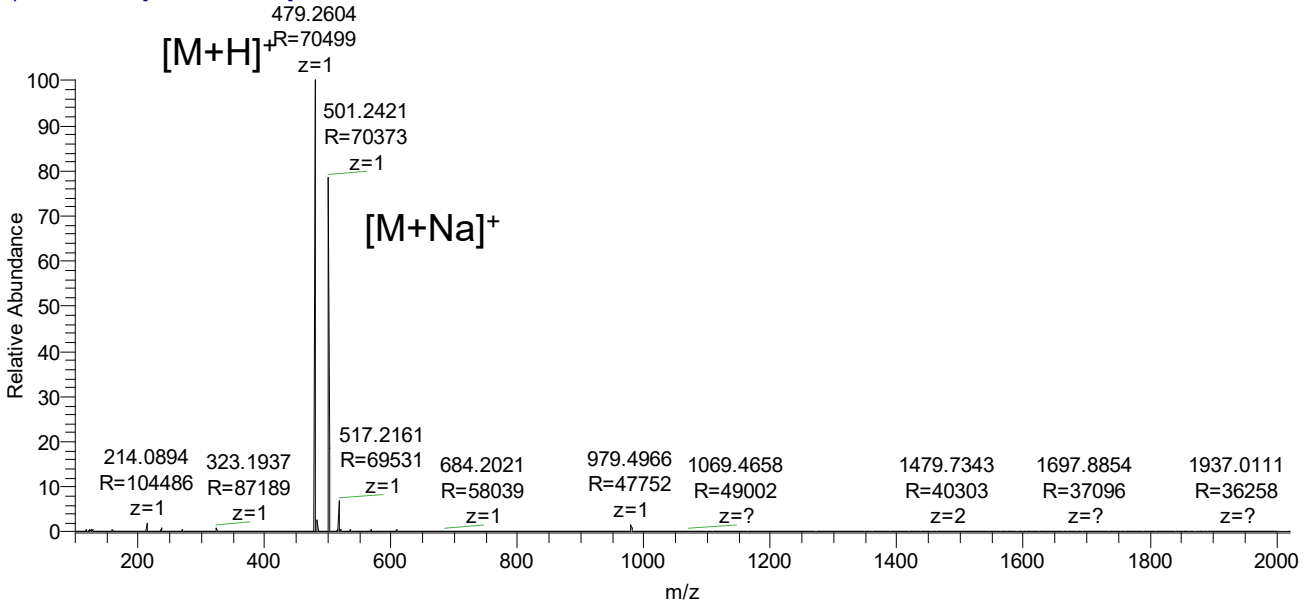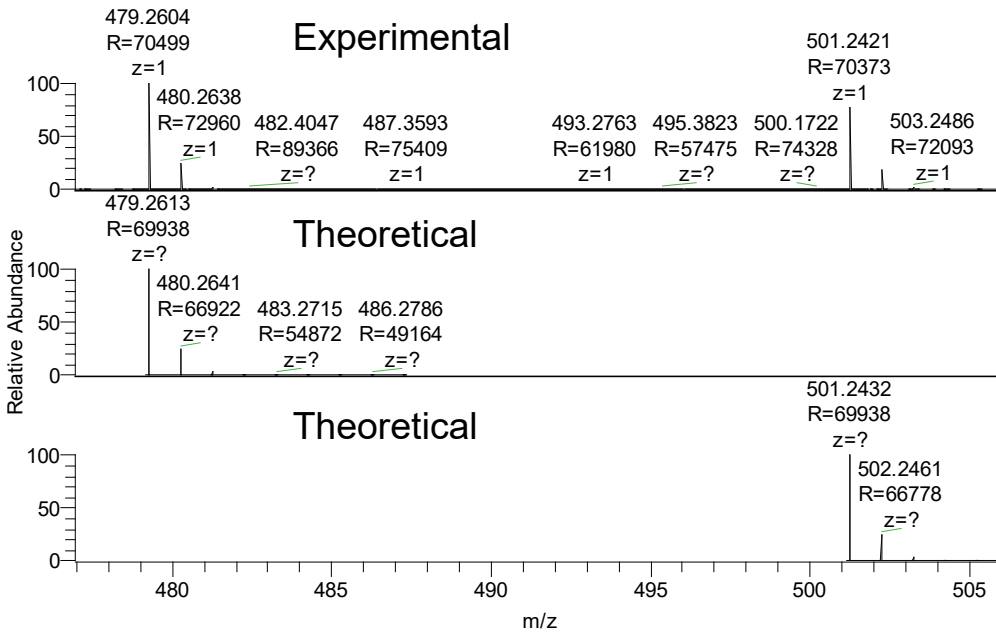

NL:  
2.94E6  
40#1-30 RT: 0.02-0.45 AV:  
30 T: FTMS + p ESI Full ms  
[100.00-2000.00]

NL:  $\Delta m = 1.90$  ppm  
1.78E4

C<sub>22</sub> H<sub>34</sub> N<sub>6</sub> O<sub>6</sub> +H:  
C<sub>22</sub> H<sub>35</sub> N<sub>6</sub> O<sub>6</sub>  
p (gss, s /p:40) Chrg 1  
R: 70000 Res .Pwr . @FWHM

NL:  $\Delta m = 2.19$  ppm  
1.78E4

C<sub>22</sub> H<sub>34</sub> N<sub>6</sub> O<sub>6</sub> +Na:  
C<sub>22</sub> H<sub>34</sub> N<sub>6</sub> O<sub>6</sub> Na<sub>1</sub>  
p (gss, s /p:40) Chrg 1  
R: 70000 Res .Pwr . @FWHM

40

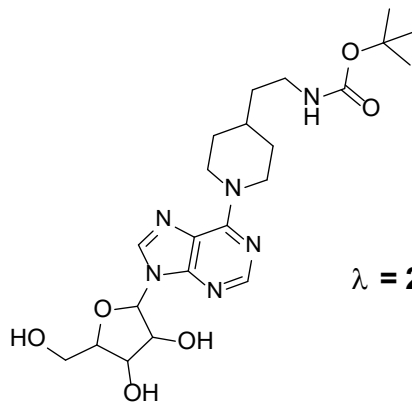

$\lambda = 254 \text{ nm}$

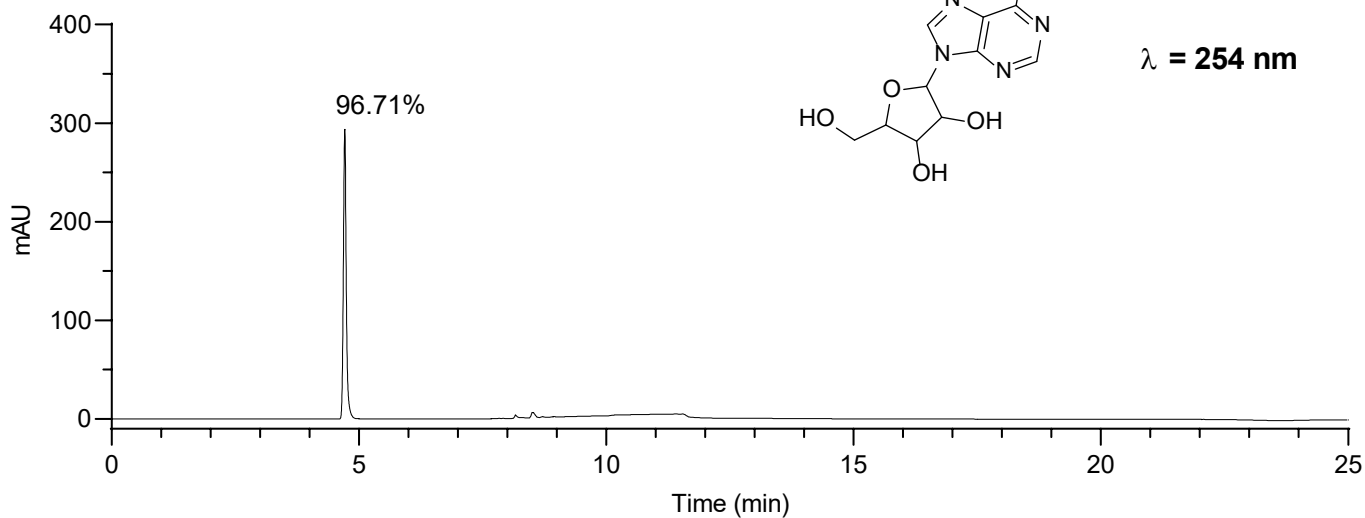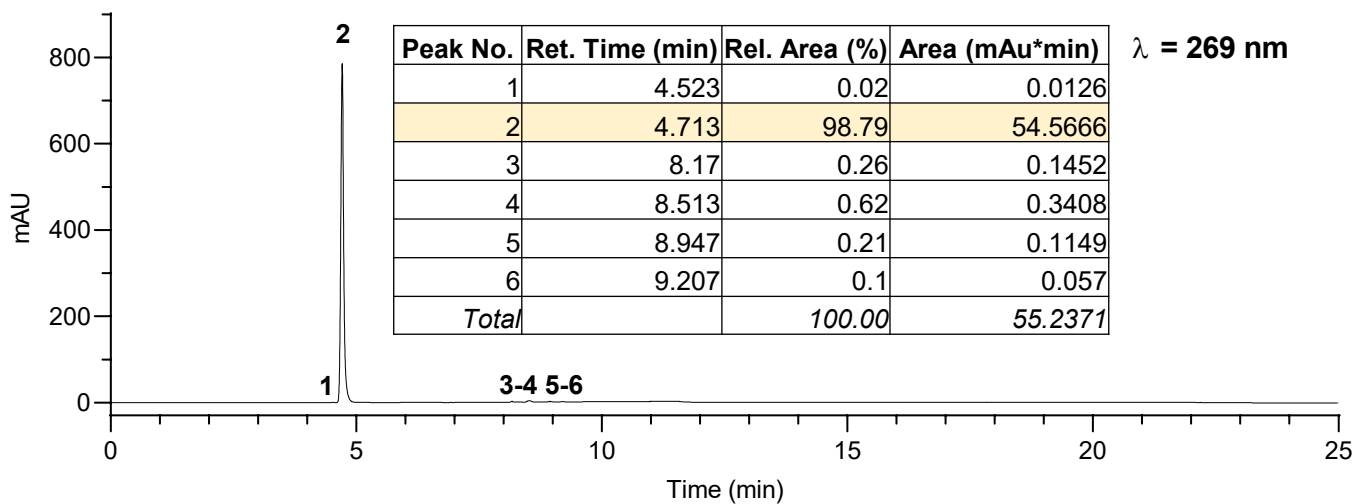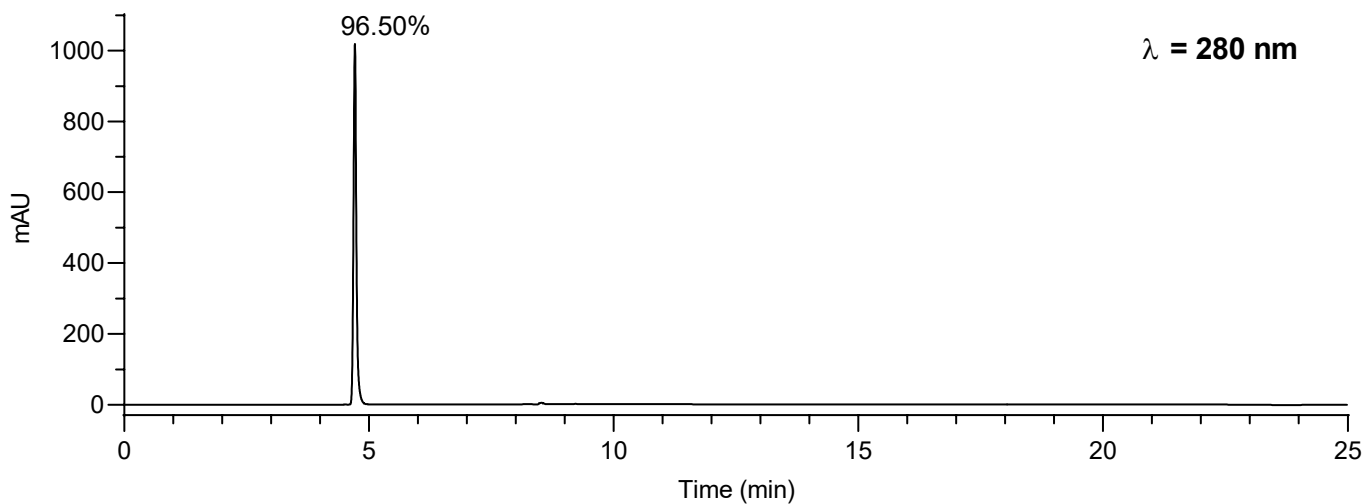

41

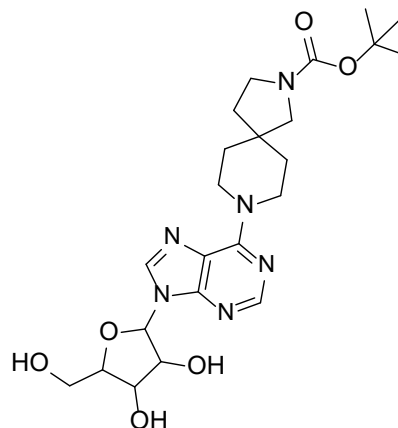

41#1-29 RT: 0.02-0.44 AV: 29 NL: 8.40E5 T: FTMS + p  
ESI Full ms [100.00-2000.00]

Full scan ESI(+)

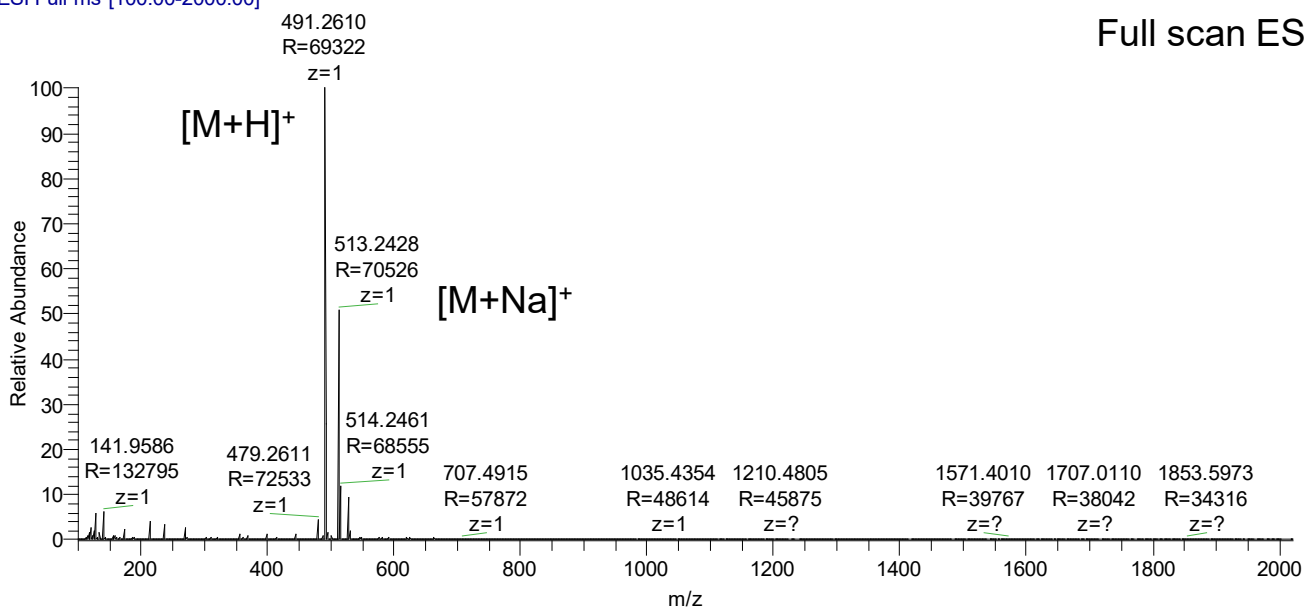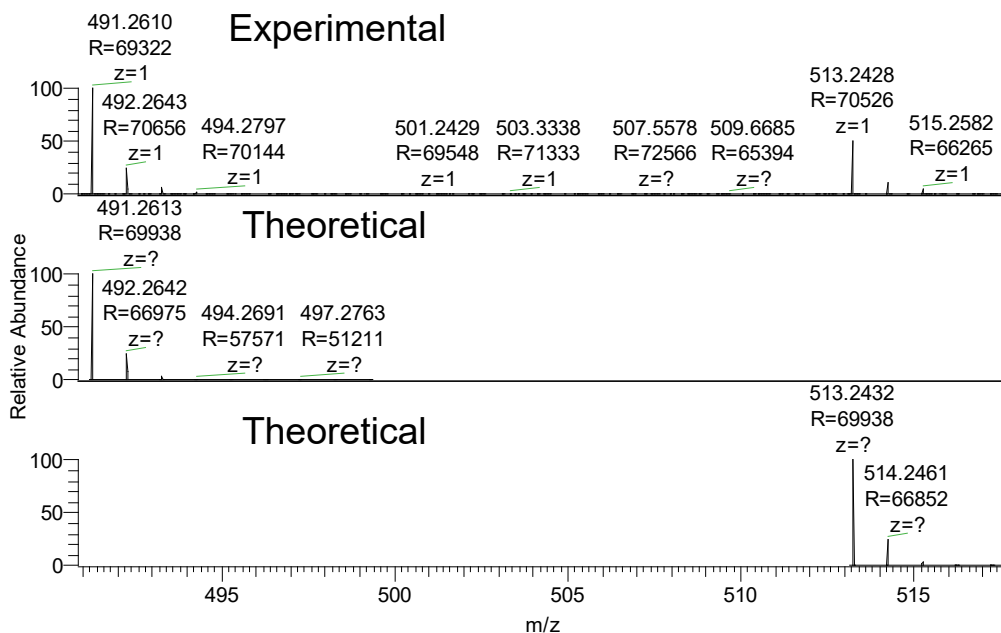

NL:  
8.40E5  
41#1-29 RT: 0.02-0.44 AV:  
29 T: FTMS + p ESI Full ms  
[100.00-2000.00]

NL:  
1.76E4  $\Delta m = 0.61$  ppm

C<sub>23</sub> H<sub>34</sub> N<sub>6</sub> O<sub>6</sub> +H:  
C<sub>23</sub> H<sub>35</sub> N<sub>6</sub> O<sub>6</sub>  
p (gss, s /p:40) Chrg 1  
R: 70000 Res .Pwr . @FWHM

NL:  
1.76E4  $\Delta m = 0.78$  ppm

C<sub>23</sub> H<sub>34</sub> N<sub>6</sub> O<sub>6</sub> +Na:  
C<sub>23</sub> H<sub>34</sub> N<sub>6</sub> O<sub>6</sub> Na<sub>1</sub>  
p (gss, s /p:40) Chrg 1  
R: 70000 Res .Pwr . @FWHM

**41**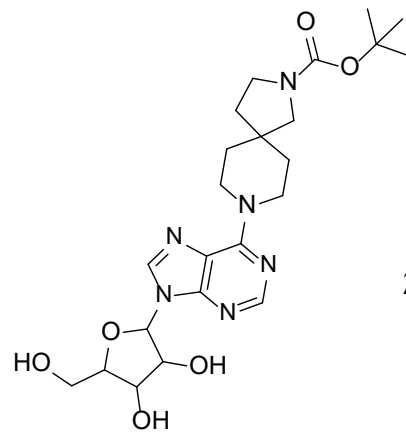 $\lambda = 254 \text{ nm}$ 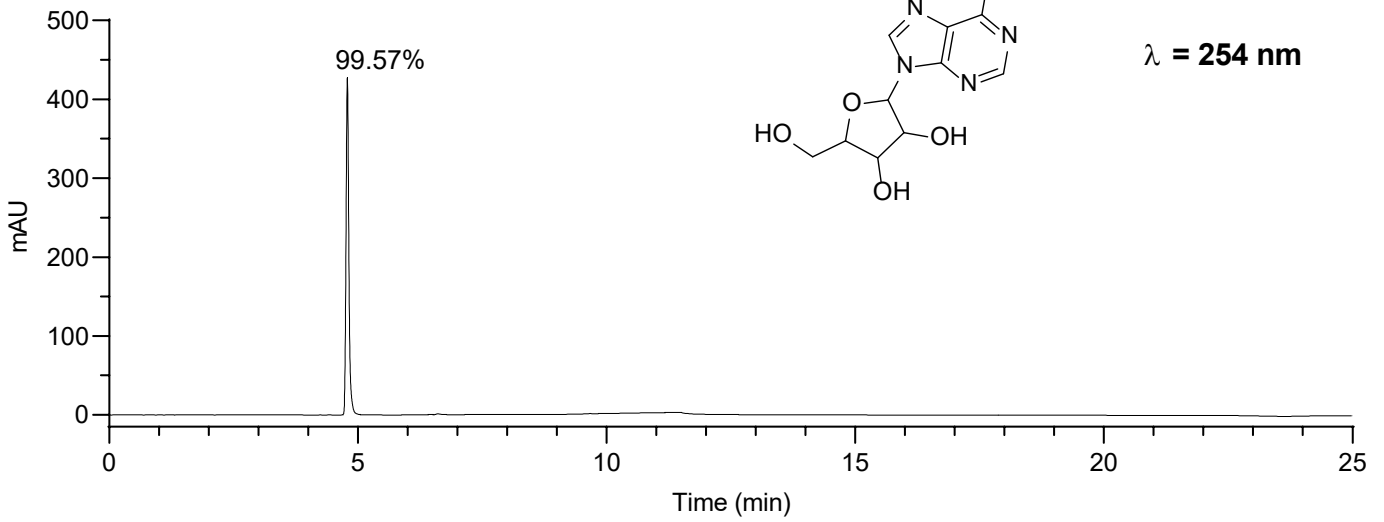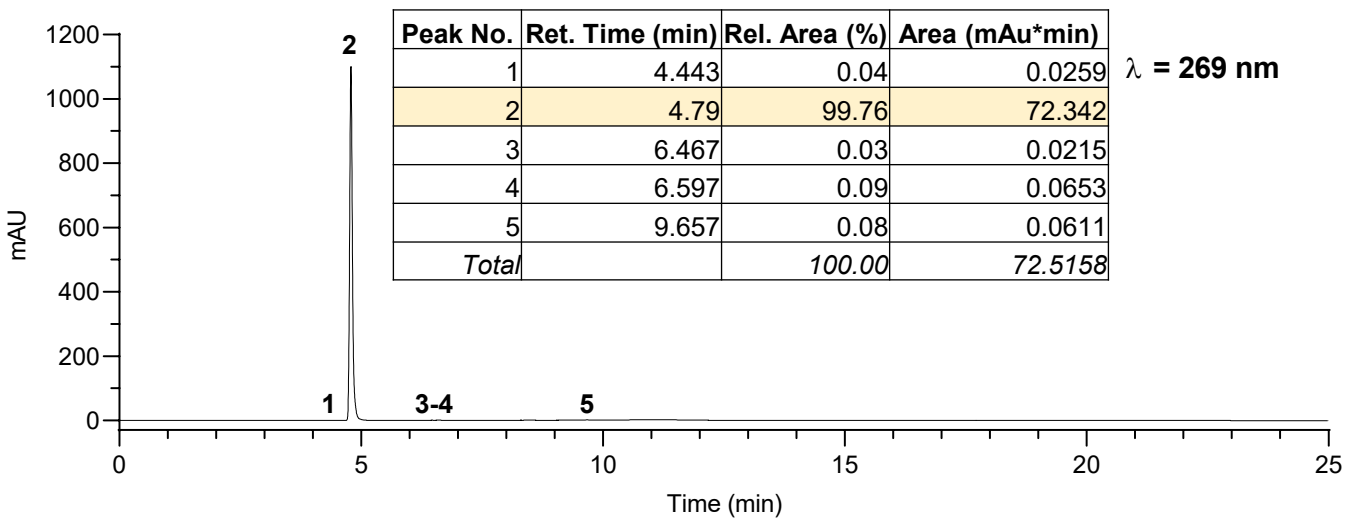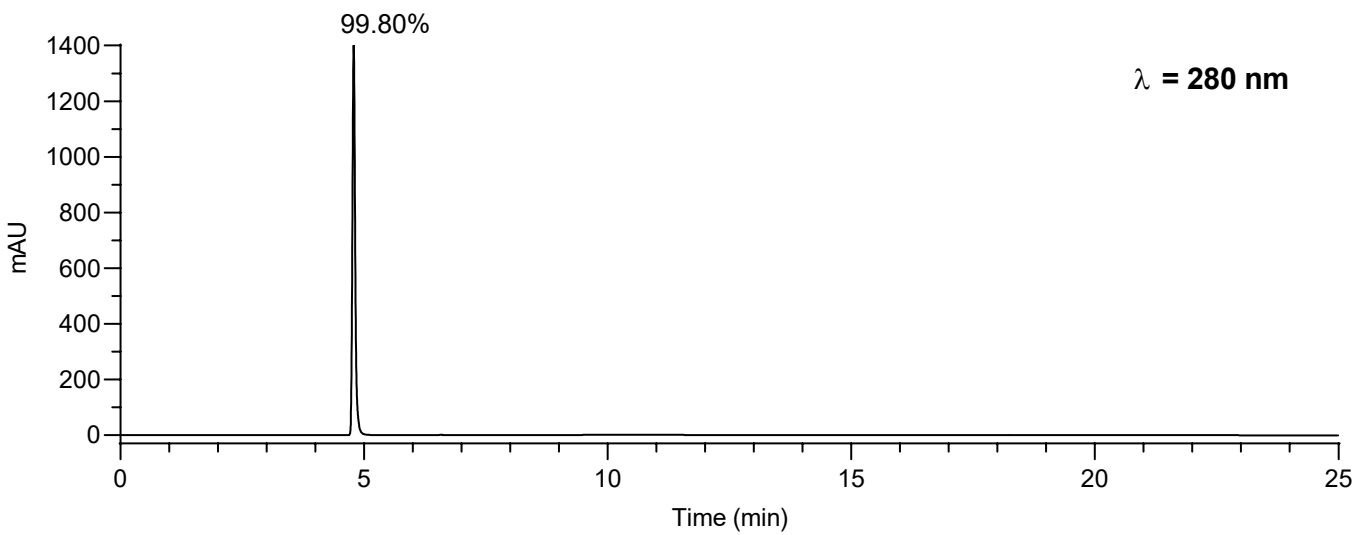

42

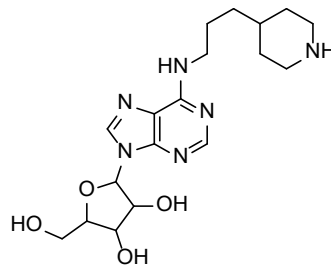

42#1-30 RT: 0.02-0.41 AV: 30 NL: 6.65E8 T: FTMS + p  
ESI Full ms [100.00-2000.00]

Full scan ESI(+)

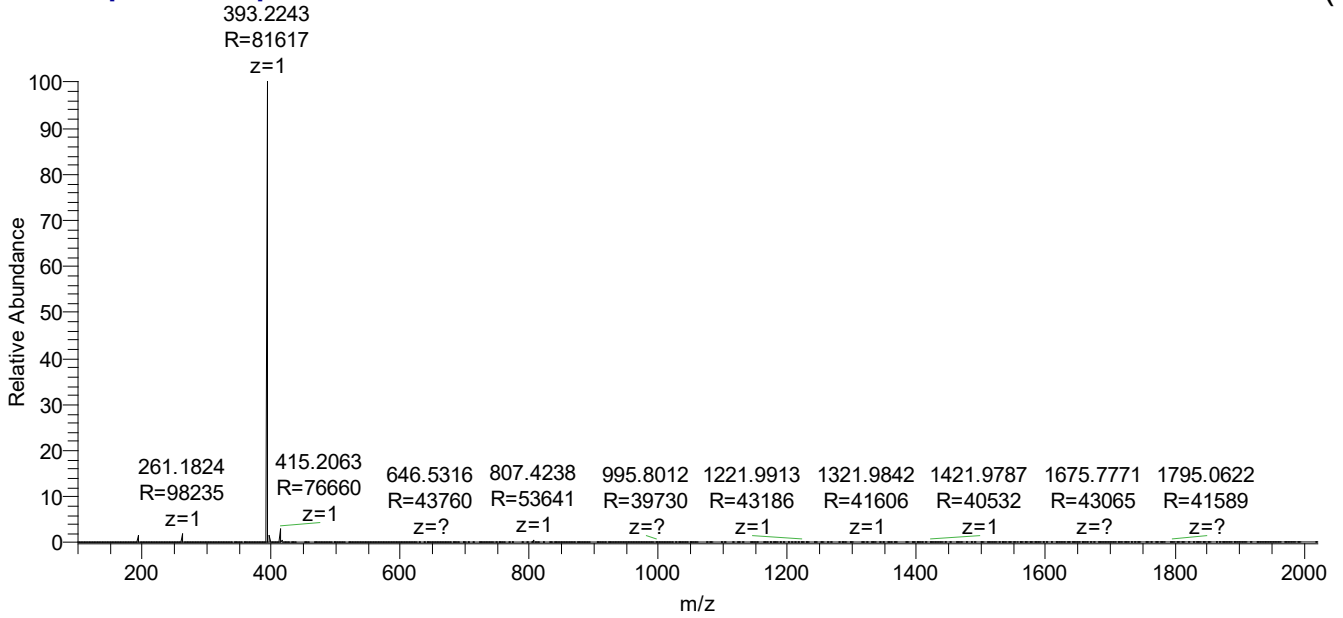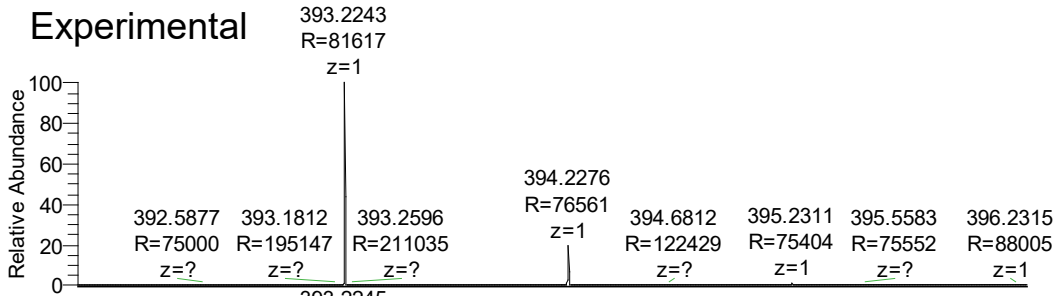

NL:  
6.65E8  
421-30 RT: 0.02-0.41 AV: 30  
T: FTMS + p ESI Full ms  
[100.00-2000.00]

NL:  
1.87E4  
C<sub>18</sub>H<sub>28</sub>N<sub>6</sub>O<sub>4</sub> +H:  
C<sub>18</sub>H<sub>29</sub>N<sub>6</sub>O<sub>4</sub>  
p (gss, s /p:40) Chrg 1  
R: 80000 Res .Pwr . @FWHM

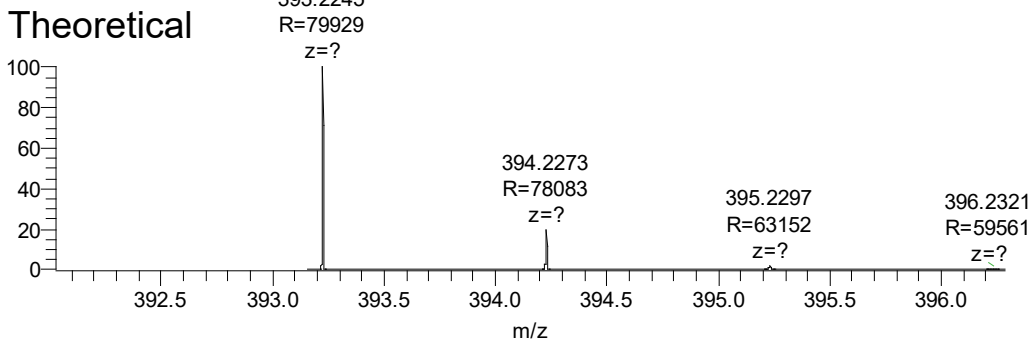

$\Delta m = 0.51$  ppm

42

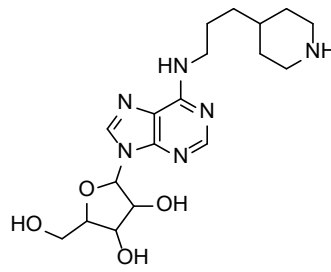

$\lambda = 254 \text{ nm}$

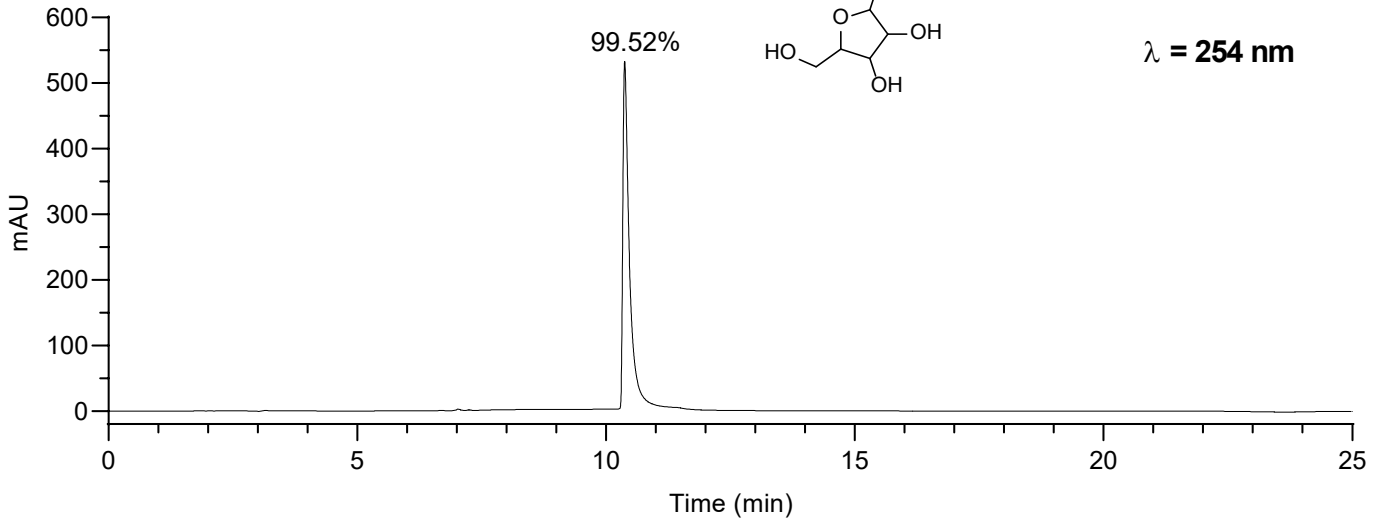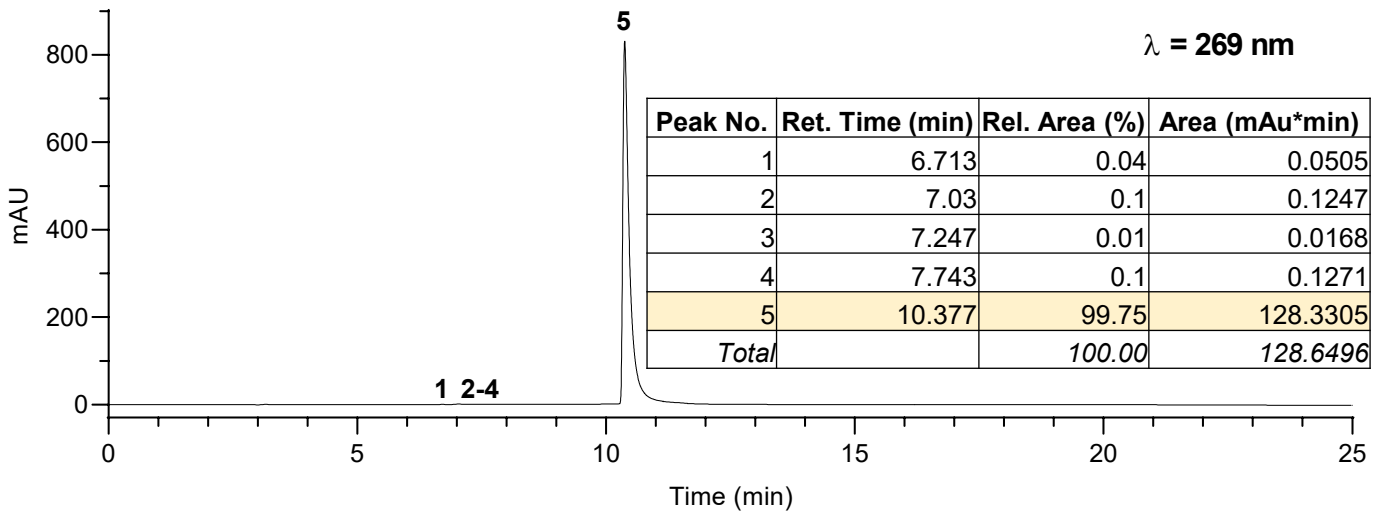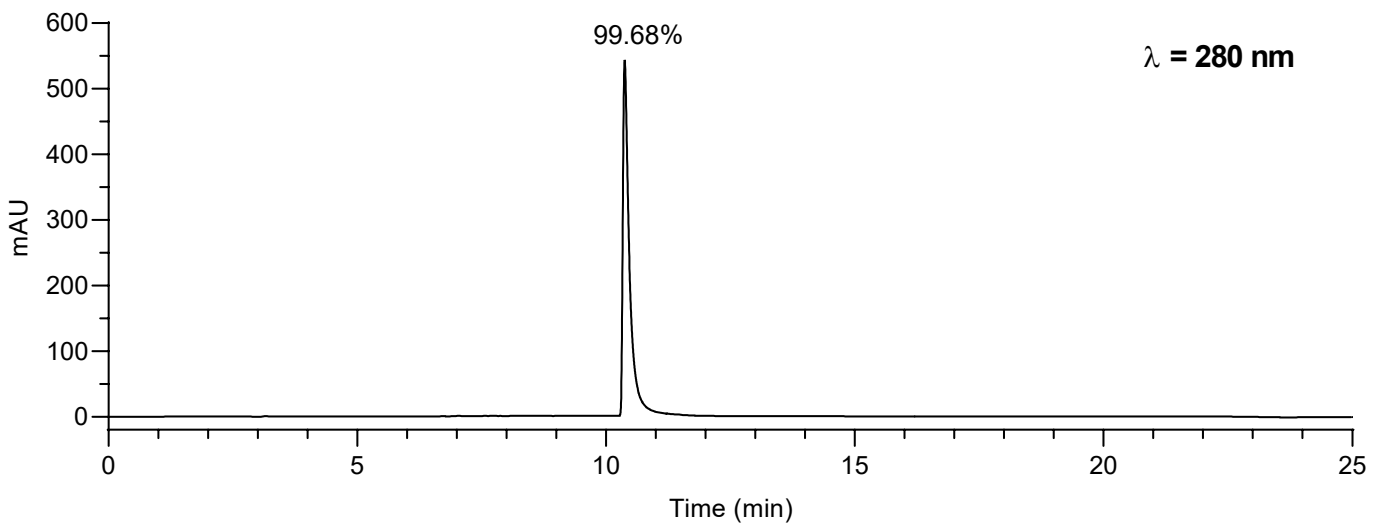

**Reversed phase HPLC analysis of compounds from Figure S1.** Compounds were analyzed by reversed phase HPLC (MZ-Aqua Perfect C-18 column, 250 x 4.6 mm, 5  $\mu$ m, 120 Å, equipped with a C-18 pre-column, 8.0 mm x 4.0 mm, 5  $\mu$ m, 120 Å) using acetonitrile gradient A (0% – 7% in 15 min and 7% – 70% in 5 min) or gradient B (4.9% – 52.5% in 30 min and 52.5 – 70% in 1 min) in aqueous TFA solution (0.01 % TFA) with a flow of 1 mL/min and detection at 260 nm.

**201 (dcSAM), gradient A**

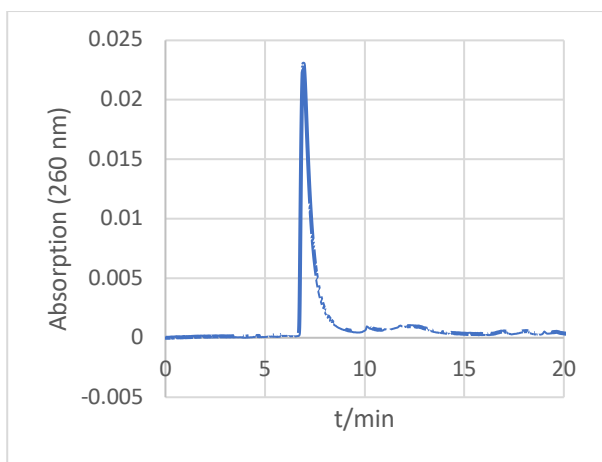

**202 (daSAM), gradient A**

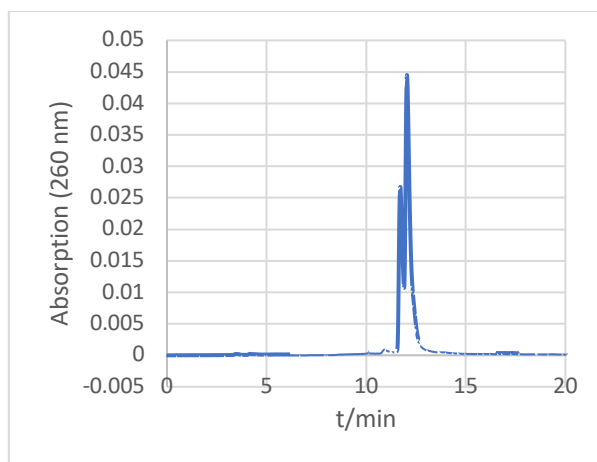

**203 (DMTA), gradient A**

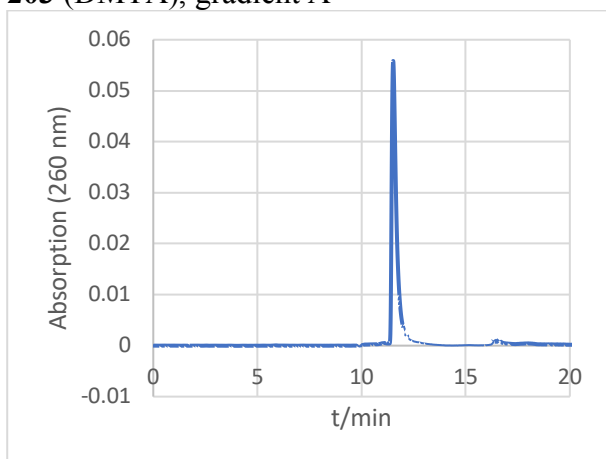

**204 (sinefungin), gradient A**

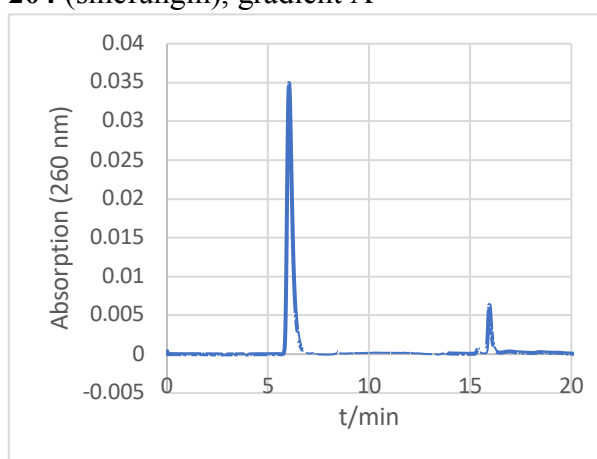



**205 (Aza-SAM), gradient A**

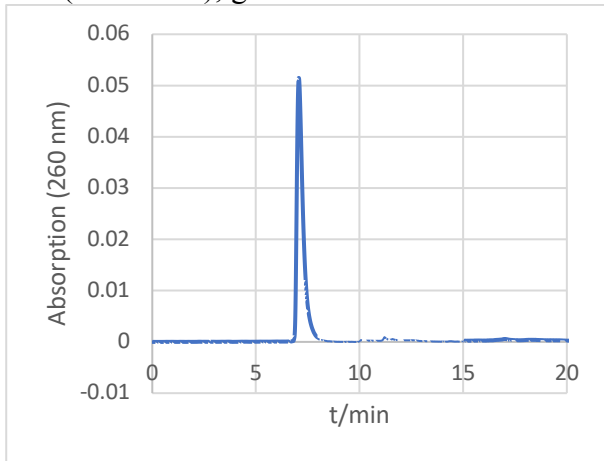

**206 (L-SAH), gradient B**

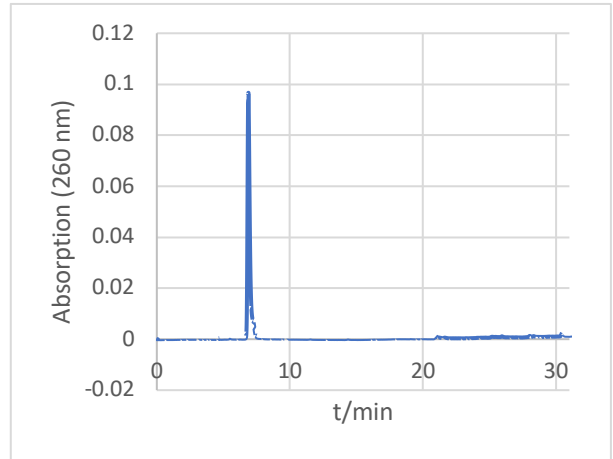

**207 (D-SAH), gradient B**

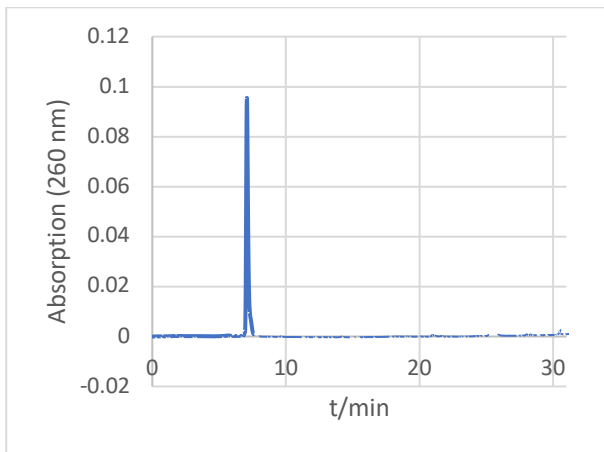

**208 (dc-SAH), gradient B**

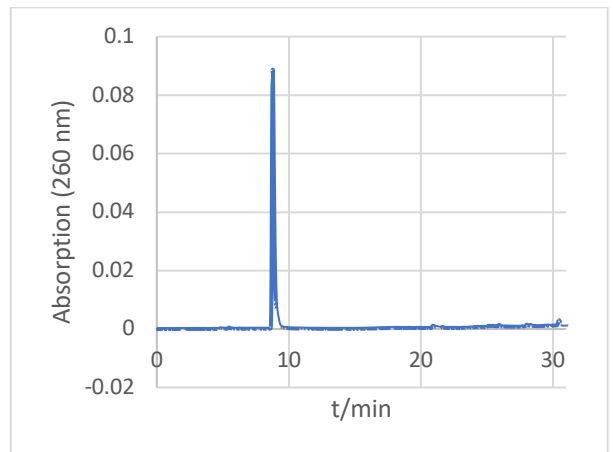

**209 (5'-adenosyl-L-cysteine), gradient B**

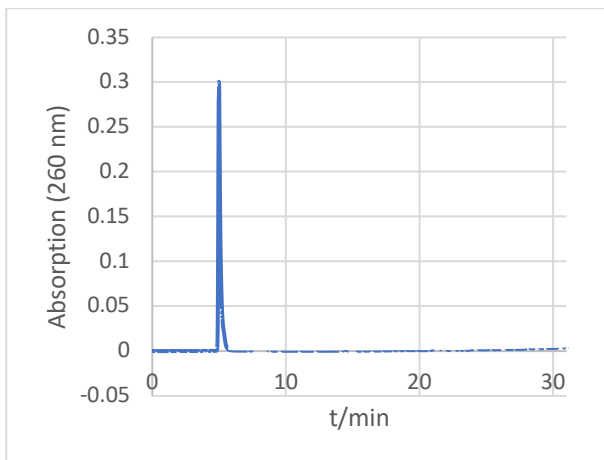

**210 (CPTA), gradient B**

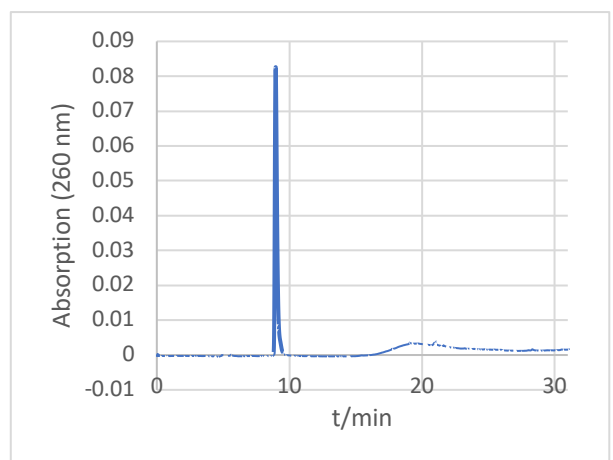

**211** (CPTA methylester), gradient B

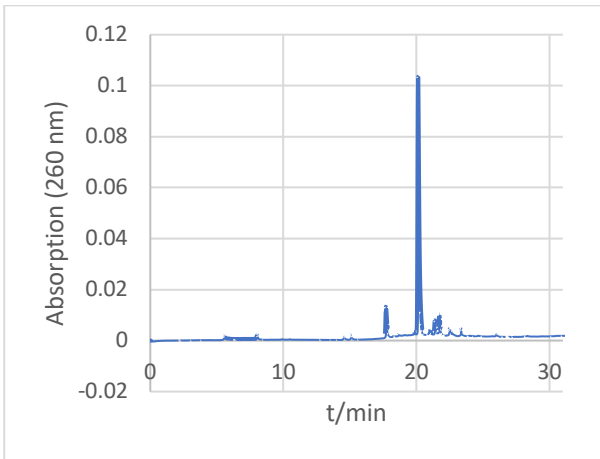

**212** (AETA), gradient A

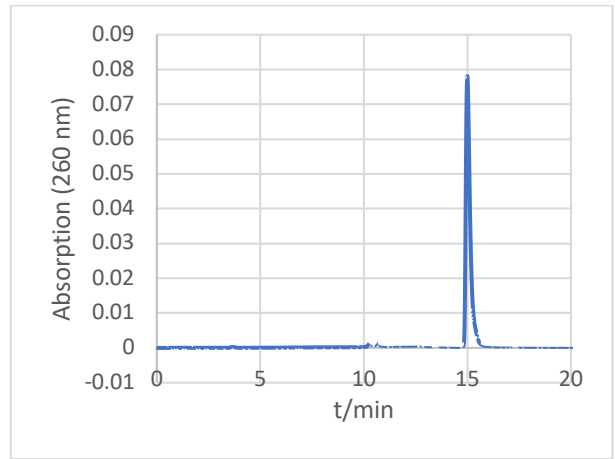

**213** (CETA), gradient B

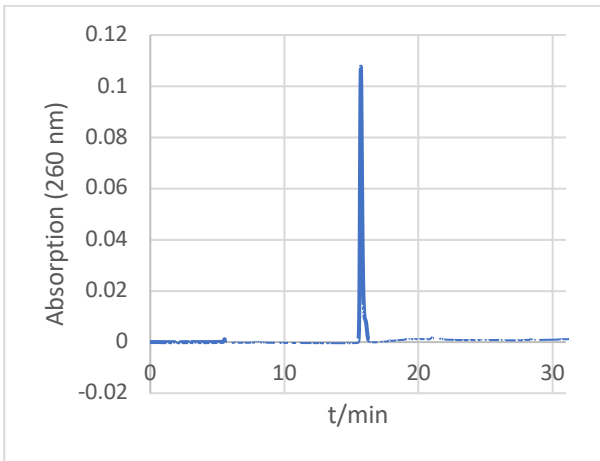

**214** (MTA), gradient B

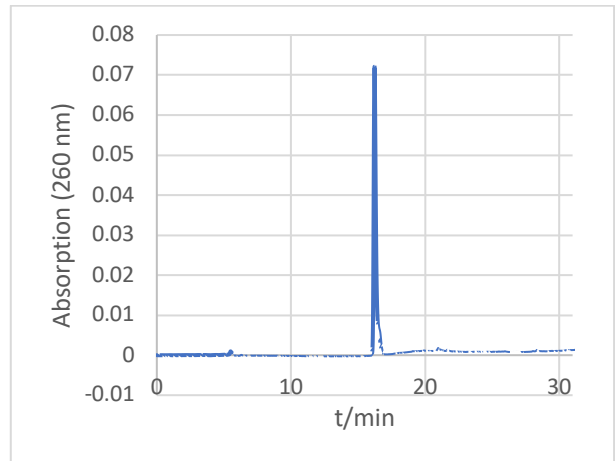

**215** (5'-thiadenosine), gradient B

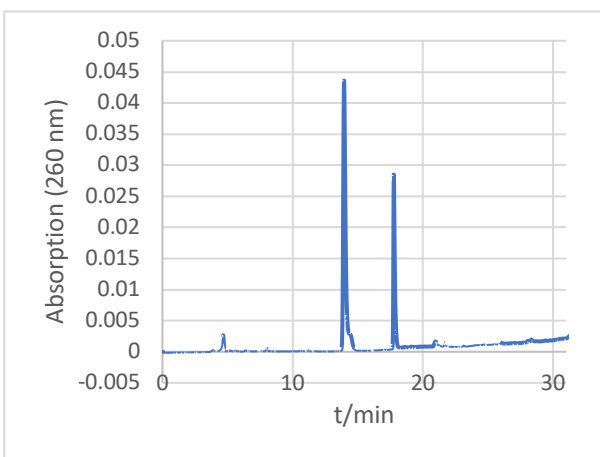

**216** (adenosine), gradient B

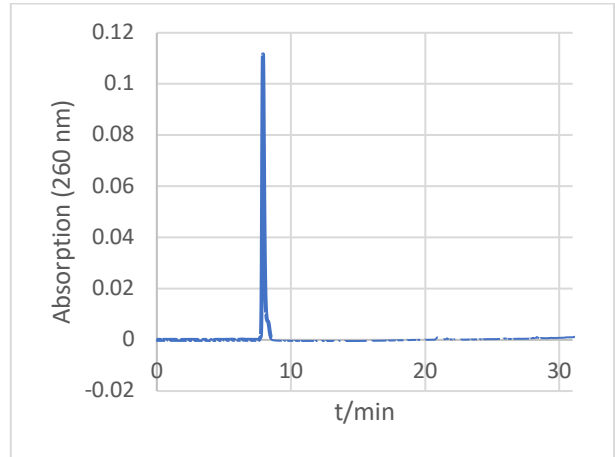

**218** (5'-aminoadenosine), gradient A

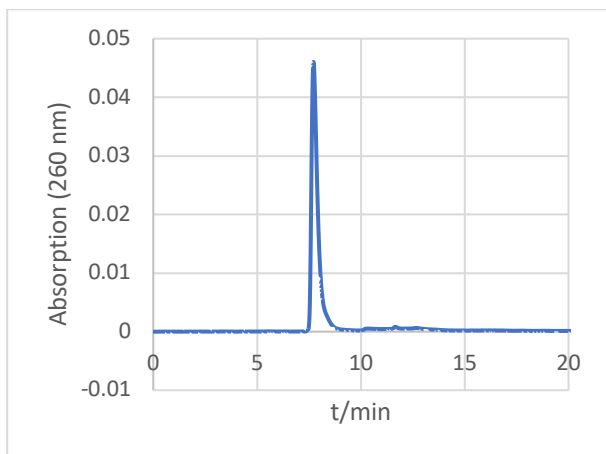

**219** (N6-methyl-2'-deoxyadenosine), gradient B

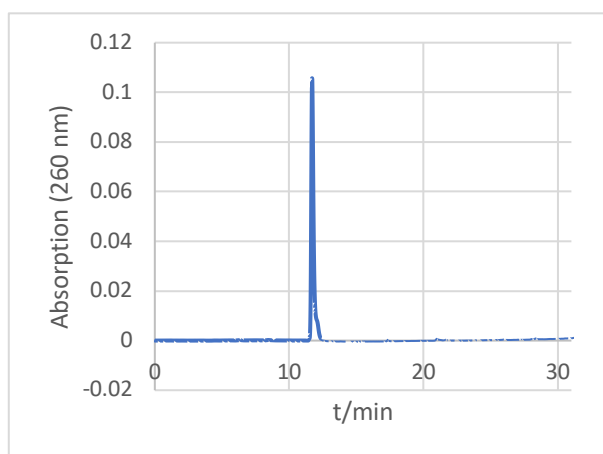

**220** (TL-107-2), gradient B

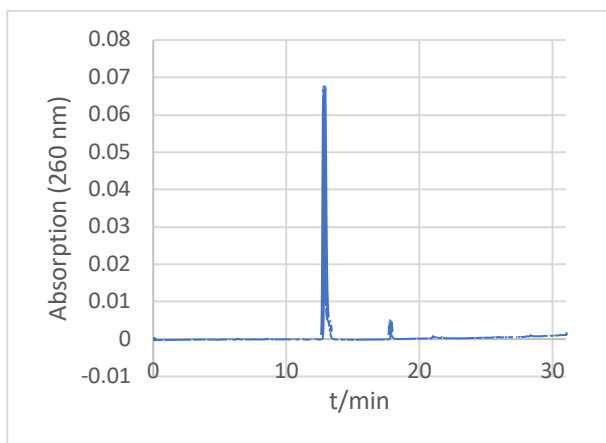

**221** (TL-106), gradient B

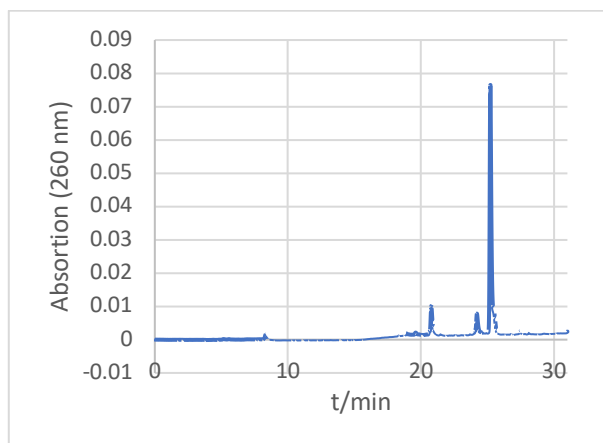

**222** (TL-104), gradient B

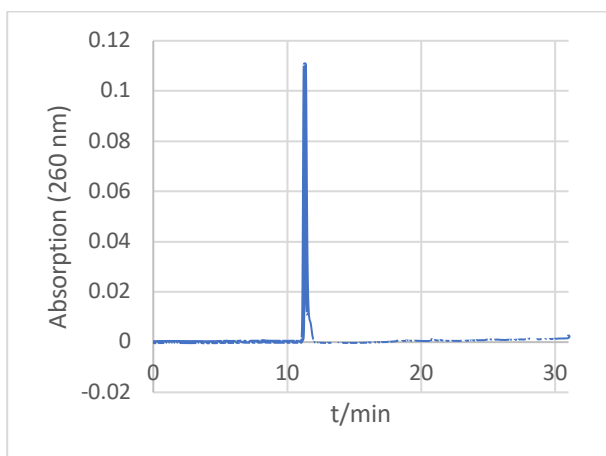

**223** (TL-100-2), gradient B

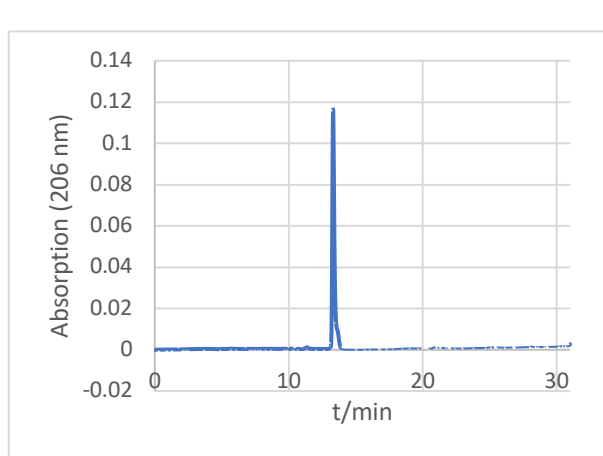

**224 (AEA), gradient A**

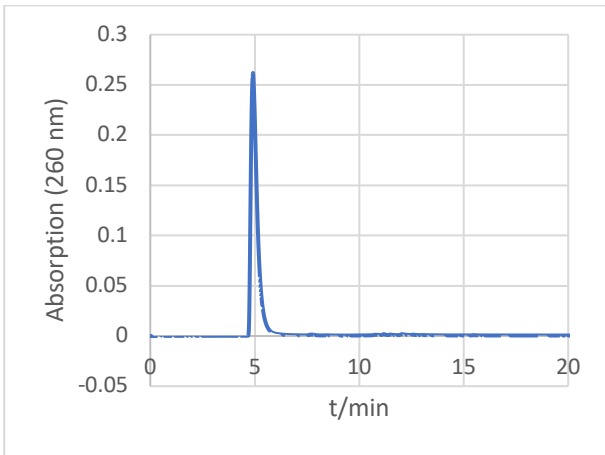

**225 (CMTA), gradient B**

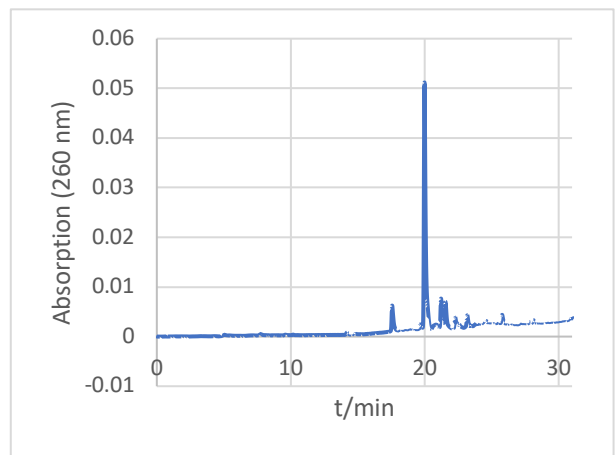

**226 (5'-deoxy-5'-chloroadenosine), gradient B**

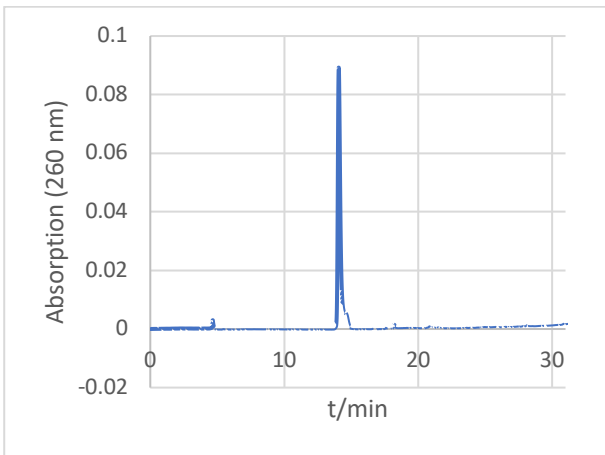

**227 (5'-phthalimidoadenosine), gradient B**

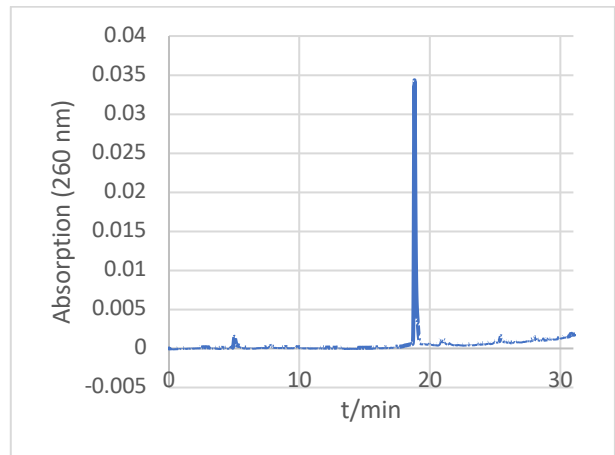

**228 (5'-deoxy-5'-acetyladenosine), gradient B**

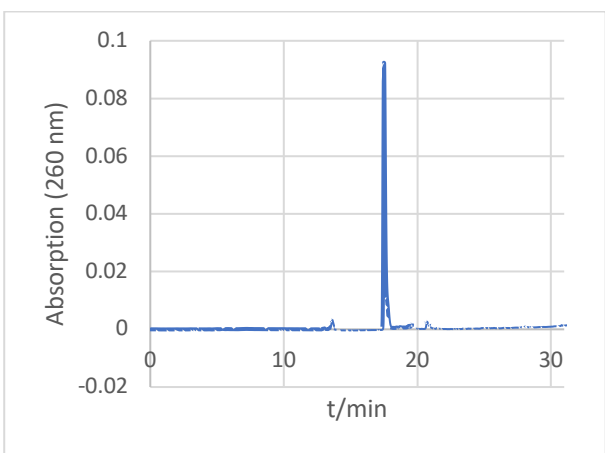

**229 (South-SAH), gradient B**

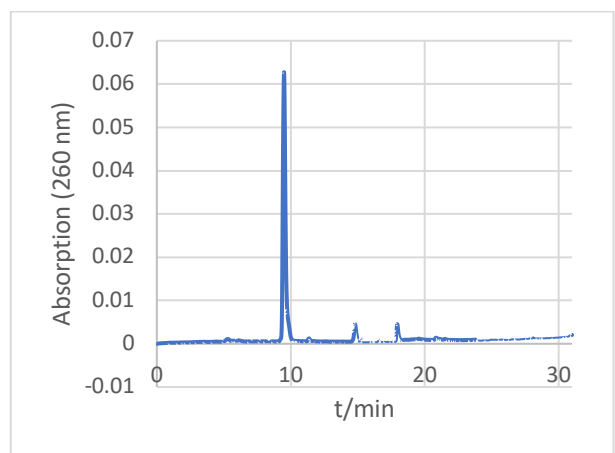

**230** (*North*-SAH), gradient B

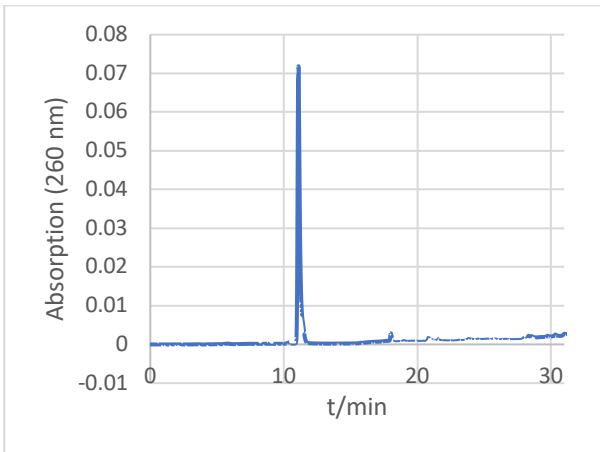

**231** (5'-ethylthioadenosine), gradient B

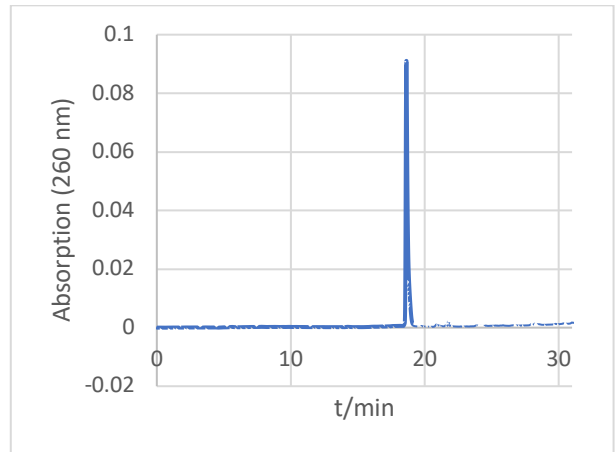

**232** (5'-propylthioadenosine), gradient B

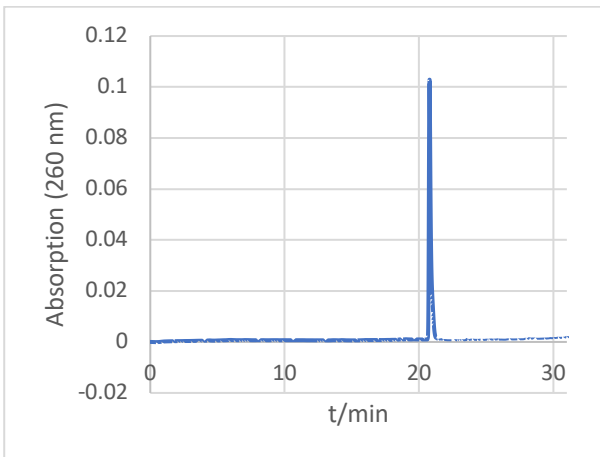

**233** (5'-butylthioadenosine), gradient B

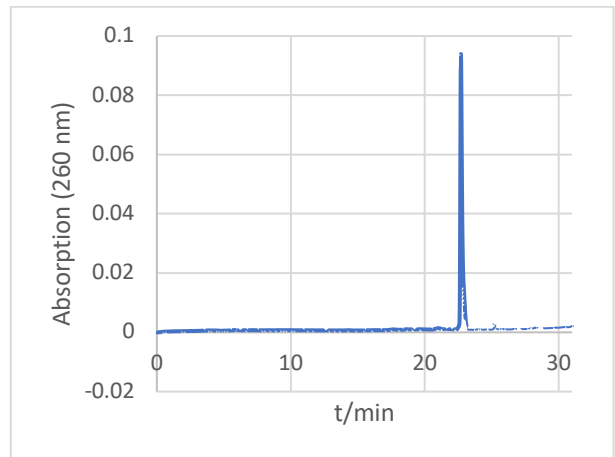

**234** (5'-methylbutylthioadenosine), gradient B

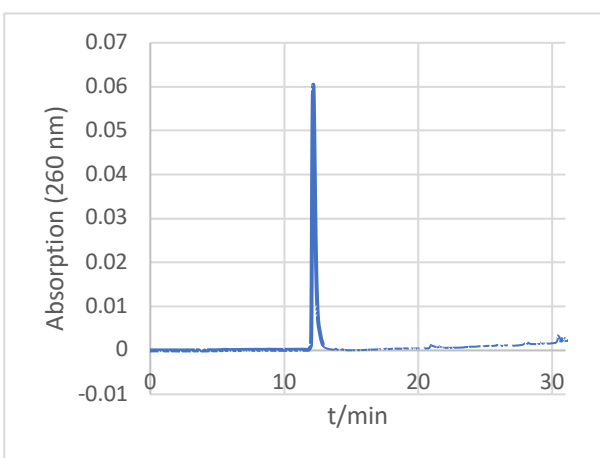

**235** (5'-methylpropylthioadenosine), gradient B

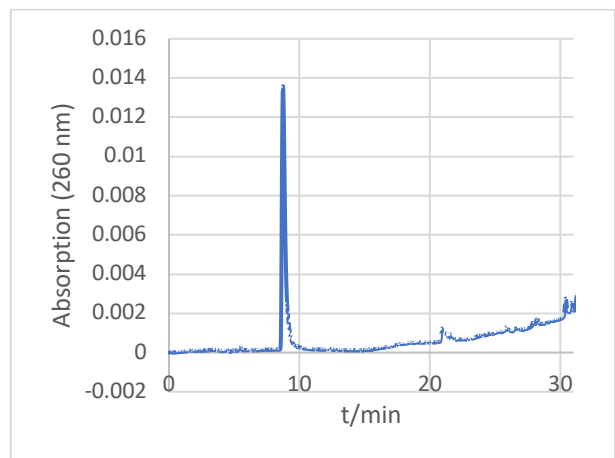

**236** (5'-methylethylthioadenosine), gradient A

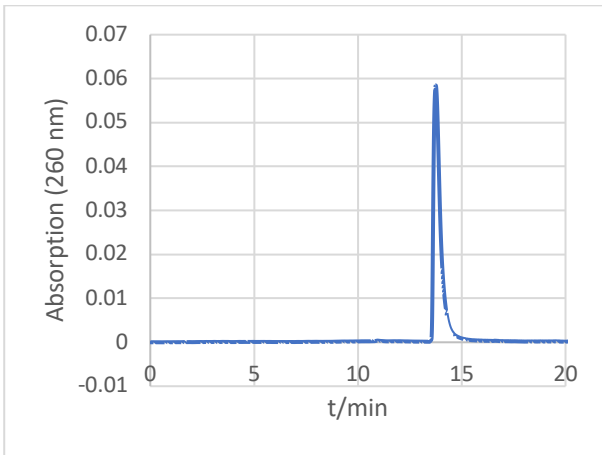

**237** (AEAA), gradient A

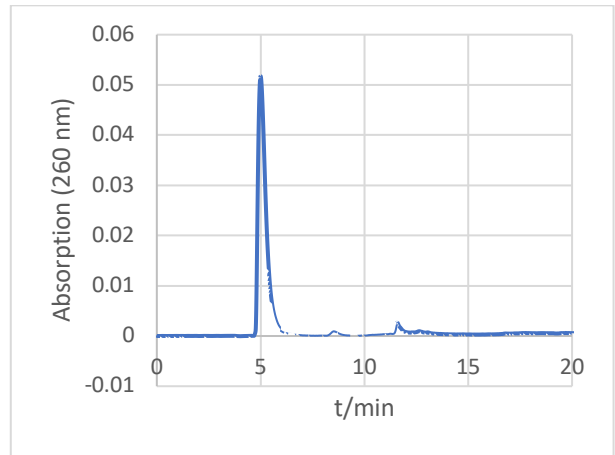

**238** (phETA), gradient B

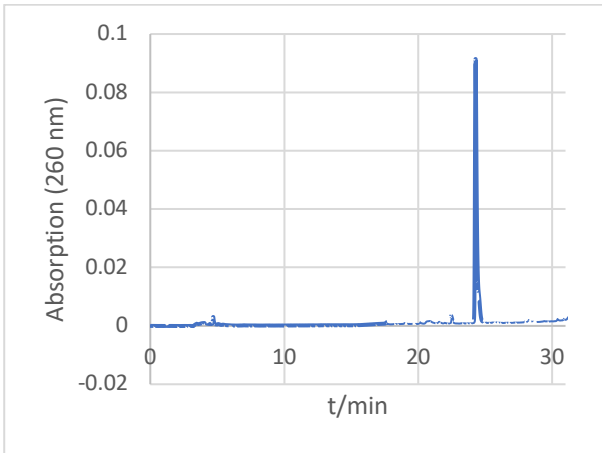

**239** (Bisubstrate inhibitor), gradient B

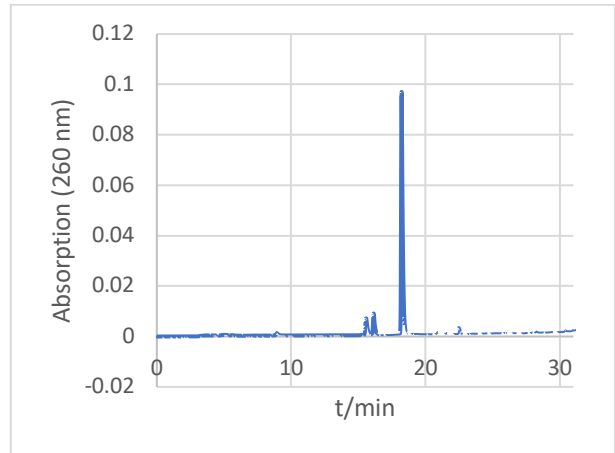

**240** (5'-iodo-5'-deoxyadenosine), gradient B

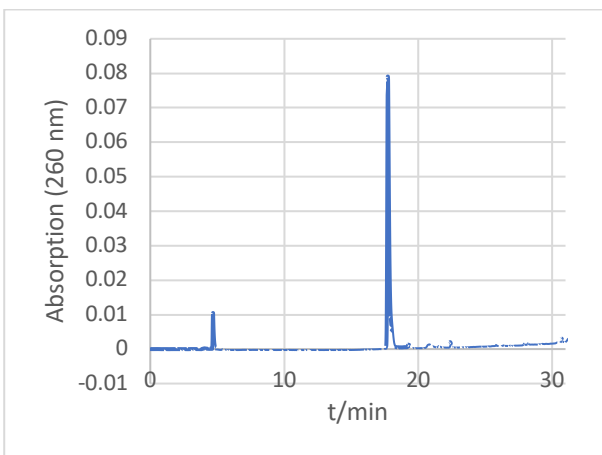

**241** (5'-tosyladenosine), gradient B

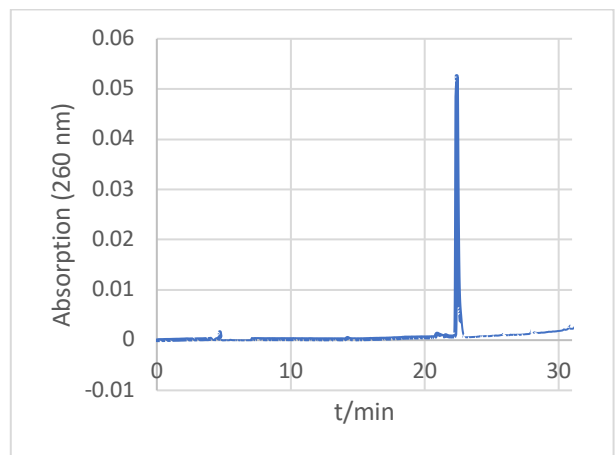

Supplement: jm2c01789_si_002.pdf [file jm2c01789_si_002.pdf]
